# Supplementary material for: Synthetic gene circuits that selectively target RAS-driven cancers
Source: eLife. 2026 Feb 24;14:RP104320. doi: 10.7554/eLife.104320 (PMC12931925; doi:10.7554/eLife.104320)
Supplement: Figure 7—source data 1. [file elife-104320-fig7-data1.xlsx]

## Sheet: Sheet1
Figure 7 - Source Data 1 | file with data from figure 7 used to create the figures. R scripts used for plotting are available on github (see data availability statement)
#	Flow Sample Names	Plate	$BTIM	replicate		Output	sensor number	MM	Circuit_ID		Sensor	RE	Layer1 NarX		Layer 2 NarL	Layer 3 Transfection reagent	DNA amount	cell line	RAS_mutation	RAS	include	Replicate	Normalized Output [RU]	Normalized Output [percent]	Absolute Output [AU]	Absolute Transfection	Single Cells | Count	mCerulean | Count	mCerulean | Freq. of Parent	mCerulean | Mean (445[B]-A)	mCherry | Count	mCherry high | Freq. of Parent	mCherry high | Mean (561[D]-A)	mScarlet | Count	mScarlet | Freq. of Parent	mScarlet | Mean (445[B]-A)	BFP | Count	BFP high | Freq. of Parent	BFP high | Mean (561[D]-A)
1	A549-V_E7_E07_049.fcs	E_GS3_98_1_mCerulean_Plate_004	21:48:37	A	1	RAS Circuit	6	MM6	MM6: RAS Sensor_F.L.T.	RAS Sensor_F.L.T.	NarX = EF1a_RBDCRD-6xfL NarL = EF1a_Narl-F.L.T.	EF1a	EF1a_RBDCRD-6xfL		EF1a_Narl-F.L.T.	Viafect [8 µL/µg]	1.5x	A549-V	mutated	KRAS G12S	no	1	0.0022004	0.0405594	6.554	2978.55	32997	240	0.0058	1130	5895	0.143	20829	36	0.0011	177602	44	0.0013	1416
2	A549-V_E8_E08_050.fcs	E_GS3_98_1_mCerulean_Plate_004	21:49:46	A	2	RAS Circuit	6	MM6	MM6: RAS Sensor_F.L.T.	RAS Sensor_F.L.T.	NarX = EF1a_RBDCRD-6xfL NarL = EF1a_Narl-F.L.T.	EF1a	EF1a_RBDCRD-6xfL		EF1a_Narl-F.L.T.	Viafect [8 µL/µg]	1.5x	A549-V	mutated	KRAS G12S	no	2	0.00176801	0.0491018	6.232	3524.87	23194	250	0.0082	760	5134	0.167	21107	21	0.00091	178898	25	0.0011	1333
3	A549-V_E9_E09_051.fcs	E_GS3_98_1_mCerulean_Plate_004	21:50:54	A	3	RAS Circuit	6	MM6	MM6: RAS Sensor_F.L.T.	RAS Sensor_F.L.T.	NarX = EF1a_RBDCRD-6xfL NarL = EF1a_Narl-F.L.T.	EF1a	EF1a_RBDCRD-6xfL		EF1a_Narl-F.L.T.	Viafect [8 µL/µg]	1.5x	A549-V	mutated	KRAS G12S	no	3	0.00189038	0.045122	6.7932	3593.57	27338	264	0.0074	918	5875	0.164	21912	26	0.00095	174741	32	0.0012	1316
4	A549-V_E10_E10_052.fcs	E_GS3_98_1_mCerulean_Plate_004	21:52:03	A	4	RAS Circuit	10	MM10	MM10: PY2_NarL-F.L.T.	PY2_NarL-F.L.T.	NarX = EF1a_RBDCRD-6xfL NarL = PY2_NarL-F.L.T	PY2	EF1a_RBDCRD-6xfL		PY2_NarL-F.L.T	Viafect [8 µL/µg]	1.5x	A549-V	mutated	KRAS G12S	no	1	0.000560571	0.0331429	2.3026	4107.6	22547	172	0.0058	397	5207	0.175	23472	24	0.0011	180353	25	0.0011	1218
5	A549-V_E11_E11_053.fcs	E_GS3_98_1_mCerulean_Plate_004	21:53:12	A	5	RAS Circuit	10	MM10	MM10: PY2_NarL-F.L.T.	PY2_NarL-F.L.T.	NarX = EF1a_RBDCRD-6xfL NarL = PY2_NarL-F.L.T	PY2	EF1a_RBDCRD-6xfL		PY2_NarL-F.L.T	Viafect [8 µL/µg]	1.5x	A549-V	mutated	KRAS G12S	no	2	0.000551981	0.0317204	2.3777	4307.57	19480	159	0.0059	403	5035	0.186	23159	32	0.0016	176325	36	0.0018	1238
6	A549-V_E12_E12_054.fcs	E_GS3_98_1_mCerulean_Plate_004	21:54:21	A	6	RAS Circuit	10	MM10	MM10: PY2_NarL-F.L.T.	PY2_NarL-F.L.T.	NarX = EF1a_RBDCRD-6xfL NarL = PY2_NarL-F.L.T	PY2	EF1a_RBDCRD-6xfL		PY2_NarL-F.L.T	Viafect [8 µL/µg]	1.5x	A549-V	mutated	KRAS G12S	no	3	0.000656048	0.0333333	2.706	4124.7	17927	148	0.006	451	4447	0.18	22915	40	0.0022	178795	49	0.0027	1169
7	A549-V_F10_F10_058.fcs	E_GS3_98_1_mCerulean_Plate_004	21:58:55	B	4	RAS Circuit	11	MM11	MM11: PY2_all_F.L.T.	PY2_all_F.L.T.	NarX = PY2_RBDCRD-6xfL NarL = PY2_NarL-F.L.T	PY2	PY2_RBDCRD-6xfL		PY2_NarL-F.L.T	Viafect [8 µL/µg]	1.5x	A549-V	mutated	KRAS G12S	no	1	0.00151041	0.0313333	4.183	2769.45	22850	138	0.0047	890	4358	0.15	18463	22	0.00096	178527	29	0.0013	1625
8	A549-V_F11_F11_059.fcs	E_GS3_98_1_mCerulean_Plate_004	22:00:05	B	5	RAS Circuit	11	MM11	MM11: PY2_all_F.L.T.	PY2_all_F.L.T.	NarX = PY2_RBDCRD-6xfL NarL = PY2_NarL-F.L.T	PY2	PY2_RBDCRD-6xfL		PY2_NarL-F.L.T	Viafect [8 µL/µg]	1.5x	A549-V	mutated	KRAS G12S	no	2	0.000873168	0.0308642	2.85	3263.98	21170	139	0.005	570	4514	0.162	20148	17	0.0008	181565	19	0.0009	1193
9	A549-V_F12_F12_060.fcs	E_GS3_98_1_mCerulean_Plate_004	22:01:14	B	6	RAS Circuit	11	MM11	MM11: PY2_all_F.L.T.	PY2_all_F.L.T.	NarX = PY2_RBDCRD-6xfL NarL = PY2_NarL-F.L.T	PY2	PY2_RBDCRD-6xfL		PY2_NarL-F.L.T	Viafect [8 µL/µg]	1.5x	A549-V	mutated	KRAS G12S	no	3	0.00119401	0.0329114	3.6712	3074.68	18579	126	0.0052	706	3845	0.158	19460	14	0.00075	185047	19	0.001	1388
10	A549-V_G7_G07_061.fcs	E_GS3_98_1_mCerulean_Plate_004	22:02:21	C	1	RAS Circuit	8	MM8	MM8: pFos_NarL-F.L.T.	pFos_NarL-F.L.T.	NarX = EF1a_RBDCRD-6xfL NarL = pFos_NarL-F.L.T	pFos	EF1a_RBDCRD-6xfL		pFos_NarL-F.L.T	Viafect [8 µL/µg]	1.5x	A549-V	mutated	KRAS G12S	no	1	0.00326169	0.0645963	10.1088	3099.25	28574	384	0.0104	972	5919	0.161	19250	21	0.00073	185513	28	0.00098	1435
11	A549-V_G8_G08_062.fcs	E_GS3_98_1_mCerulean_Plate_004	22:03:30	C	2	RAS Circuit	8	MM8	MM8: pFos_NarL-F.L.T.	pFos_NarL-F.L.T.	NarX = EF1a_RBDCRD-6xfL NarL = pFos_NarL-F.L.T	pFos	EF1a_RBDCRD-6xfL		pFos_NarL-F.L.T	Viafect [8 µL/µg]	1.5x	A549-V	mutated	KRAS G12S	no	2	0.00338981	0.0781818	11.3262	3341.25	23550	400	0.0129	878	5114	0.165	20250	19	0.00081	173749	23	0.00098	1519
12	A549-V_G9_G09_063.fcs	E_GS3_98_1_mCerulean_Plate_004	22:04:38	C	3	RAS Circuit	8	MM8	MM8: pFos_NarL-F.L.T.	pFos_NarL-F.L.T.	NarX = EF1a_RBDCRD-6xfL NarL = pFos_NarL-F.L.T	pFos	EF1a_RBDCRD-6xfL		pFos_NarL-F.L.T	Viafect [8 µL/µg]	1.5x	A549-V	mutated	KRAS G12S	no	3	0.00396492	0.0922652	14.9465	3769.69	22517	506	0.0167	895	5496	0.181	20827	19	0.00084	166605	21	0.00093	1358
13	A549-V_G10_G10_064.fcs	E_GS3_98_1_mCerulean_Plate_004	22:05:47	C	4	Control	12	MM12	MM12: RBDr89lCRDc168S_Sensor	RBDr89lCRDc168S_Sensor	NarX = EF1a_RBDr89lCRDc168s NarL = EF1a_Narl-F.L.T.	EF1a	EF1a_RBDr89lCRDc168s		EF1a_Narl-F.L.T.	Viafect [8 µL/µg]	1.5x	A549-V	mutated	KRAS G12S	no	1	0.000711547	0.0375	2.8578	4016.32	16859	150	0.0066	433	4016	0.176	22820	27	0.0016	175856	33	0.002	1183
14	A549-V_G11_G11_065.fcs	E_GS3_98_1_mCerulean_Plate_004	22:06:56	C	5	Control	12	MM12	MM12: RBDr89lCRDc168S_Sensor	RBDr89lCRDc168S_Sensor	NarX = EF1a_RBDr89lCRDc168s NarL = EF1a_Narl-F.L.T.	EF1a	EF1a_RBDr89lCRDc168s		EF1a_Narl-F.L.T.	Viafect [8 µL/µg]	1.5x	A549-V	mutated	KRAS G12S	no	2	0.000740057	0.0366337	3.293	4449.66	12387	130	0.0074	445	3541	0.202	22028	22	0.0018	184669	23	0.0019	1187
15	A549-V_G12_G12_066.fcs	E_GS3_98_1_mCerulean_Plate_004	22:08:05	C	6	Control	12	MM12	MM12: RBDr89lCRDc168S_Sensor	RBDr89lCRDc168S_Sensor	NarX = EF1a_RBDr89lCRDc168s NarL = EF1a_Narl-F.L.T.	EF1a	EF1a_RBDr89lCRDc168s		EF1a_Narl-F.L.T.	Viafect [8 µL/µg]	1.5x	A549-V	mutated	KRAS G12S	no	3	0.000832772	0.0385787	3.6176	4344.05	14644	155	0.0076	476	4031	0.197	22051	24	0.0016	171179	25	0.0017	1196
16	A549-V_H7_H07_067.fcs	E_GS3_98_1_mCerulean_Plate_004	22:09:13	D	1	RAS Circuit	9	MM9	MM9: SRE_NarL-F.L.T.	SRE_NarL-F.L.T.	NarX = EF1a_RBDCRD-6xfL NarL = SRE_NarL-F.L.T	SRE	EF1a_RBDCRD-6xfL		SRE_NarL-F.L.T	Viafect [8 µL/µg]	1.5x	A549-V	mutated	KRAS G12S	no	1	0.000574109	0.0267081	2.0554	3580.16	28386	159	0.0043	478	6000	0.161	22237	27	0.00095	181236	33	0.0012	1232
17	A549-V_H8_H08_068.fcs	E_GS3_98_1_mCerulean_Plate_004	22:10:22	D	2	RAS Circuit	9	MM9	MM9: SRE_NarL-F.L.T.	SRE_NarL-F.L.T.	NarX = EF1a_RBDCRD-6xfL NarL = SRE_NarL-F.L.T	SRE	EF1a_RBDCRD-6xfL		SRE_NarL-F.L.T	Viafect [8 µL/µg]	1.5x	A549-V	mutated	KRAS G12S	no	2	0.000932918	0.0335484	3.1772	3405.66	24864	168	0.0052	611	5021	0.155	21972	24	0.00097	181829	28	0.0011	1318
18	A549-V_H9_H09_069.fcs	E_GS3_98_1_mCerulean_Plate_004	22:11:30	D	3	RAS Circuit	9	MM9	MM9: SRE_NarL-F.L.T.	SRE_NarL-F.L.T.	NarX = EF1a_RBDCRD-6xfL NarL = SRE_NarL-F.L.T	SRE	EF1a_RBDCRD-6xfL		SRE_NarL-F.L.T	Viafect [8 µL/µg]	1.5x	A549-V	mutated	KRAS G12S	no	3	0.00154496	0.05	6.4263	4159.52	18529	239	0.0093	691	4803	0.186	22363	24	0.0013	173417	27	0.0015	1232
19	A549-V_H1_H01_064.fcs	E_GS3_98_1_mScarlet_Plate_006	04:52:46	A	4	MAPK Sensor	15	MM15	MM15: pFos_mScarlet	pFos_mScarlet	NarX = pFos_mScarlet NarL = 0	pFos	pFos_mScarlet		0	Viafect [8 µL/µg]	1.5x	A549-V	mutated	KRAS G12S	no	1	0.000864461	0.0263636	1.5457	1788.05	46819	0	0		0	0		135	0.0029	533	5173	0.11	16255
20	A549-V_H2_H02_065.fcs	E_GS3_98_1_mScarlet_Plate_006	04:53:54	A	5	MAPK Sensor	15	MM15	MM15: pFos_mScarlet	pFos_mScarlet	NarX = pFos_mScarlet NarL = 0	pFos	pFos_mScarlet		0	Viafect [8 µL/µg]	1.5x	A549-V	mutated	KRAS G12S	no	2	0.0012949	0.0355372	2.4209	1869.57	38739	0	0		0	0		166	0.0043	563	4690	0.121	15451
21	A549-V_H3_H03_066.fcs	E_GS3_98_1_mScarlet_Plate_006	04:55:02	A	6	MAPK Sensor	15	MM15	MM15: pFos_mScarlet	pFos_mScarlet	NarX = pFos_mScarlet NarL = 0	pFos	pFos_mScarlet		0	Viafect [8 µL/µg]	1.5x	A549-V	mutated	KRAS G12S	no	3	0.00105233	0.0336207	1.9773	1878.97	41082	0	0		0	0		162	0.0039	507	4775	0.116	16198
22	A549-V_H4_H04_067.fcs	E_GS3_98_1_mScarlet_Plate_006	04:56:11	B	1	MAPK Sensor	16	MM16	MM16: PY2_mScarlet	PY2_mScarlet	NarX = PY2_mScarlet NarL = 0	PY2	PY2_mScarlet		0	Viafect [8 µL/µg]	1.5x	A549-V	mutated	KRAS G12S	no	1	0.000175331	0.00431655	0.3942	2248.33	38296	0	0		0	0		23	0.0006	657	5334	0.139	16175
23	A549-V_H5_H05_068.fcs	E_GS3_98_1_mScarlet_Plate_006	04:57:19	B	2	MAPK Sensor	16	MM16	MM16: PY2_mScarlet	PY2_mScarlet	NarX = PY2_mScarlet NarL = 0	PY2	PY2_mScarlet		0	Viafect [8 µL/µg]	1.5x	A549-V	mutated	KRAS G12S	no	2	0.000111131	0.00398649	0.26727	2405	35867	0	0		0	0		21	0.00059	453	5323	0.148	16250
24	A549-V_H6_H06_069.fcs	E_GS3_98_1_mScarlet_Plate_006	04:58:28	B	3	MAPK Sensor	16	MM16	MM16: PY2_mScarlet	PY2_mScarlet	NarX = PY2_mScarlet NarL = 0	PY2	PY2_mScarlet		0	Viafect [8 µL/µg]	1.5x	A549-V	mutated	KRAS G12S	no	3	0.00014421	0.00493421	0.35175	2439.14	29477	0	0		0	0		22	0.00075	469	4495	0.152	16047
25	A549-V_H7_H07_070.fcs	E_GS3_98_1_mScarlet_Plate_006	04:59:36	B	4	MAPK Sensor	17	MM17	MM17: SRE_mScarlet	SRE_mScarlet	NarX = SRE_mScarlet NarL = 0	SRE	SRE_mScarlet		0	Viafect [8 µL/µg]	1.5x	A549-V	mutated	KRAS G12S	no	1	0.000442175	0.0129771	1.02	2306.78	36033	0	0		0	0		62	0.0017	600	4722	0.131	17609
26	A549-V_H8_H08_071.fcs	E_GS3_98_1_mScarlet_Plate_006	05:00:44	B	5	MAPK Sensor	17	MM17	MM17: SRE_mScarlet	SRE_mScarlet	NarX = SRE_mScarlet NarL = 0	SRE	SRE_mScarlet		0	Viafect [8 µL/µg]	1.5x	A549-V	mutated	KRAS G12S	no	2	0.000581094	0.0160839	1.403	2414.41	29769	0	0		0	0		68	0.0023	610	4266	0.143	16884
27	A549-V_H9_H09_072.fcs	E_GS3_98_1_mScarlet_Plate_006	05:01:53	B	6	MAPK Sensor	17	MM17	MM17: SRE_mScarlet	SRE_mScarlet	NarX = SRE_mScarlet NarL = 0	SRE	SRE_mScarlet		0	Viafect [8 µL/µg]	1.5x	A549-V	mutated	KRAS G12S	no	3	0.000412054	0.011194	0.9375	2275.19	35633	0	0		0	0		54	0.0015	625	4792	0.134	16979
28	AsPC-1-F_E1_E01_049.fcs	E_GS3_98_1_mCerulean_Plate_002-2	00:06:35	A	1	RAS Circuit	6	MM6	MM6: RAS Sensor_F.L.T.	RAS Sensor_F.L.T.	NarX = EF1a_RBDCRD-6xfL NarL = EF1a_Narl-F.L.T.	EF1a	EF1a_RBDCRD-6xfL		EF1a_Narl-F.L.T.	Fugene [3.5 µL/µg]	1.5x	AsPC-1-F	mutated	KRAS G12D	no	1	0.00359679	0.0477876	4.8492	1348.2	14564	105	0.0054	898	2207	0.113	11931	0	0		0	0
29	AsPC-1-F_E2_E02_050.fcs	E_GS3_98_1_mCerulean_Plate_002-2	00:07:43	A	2	RAS Circuit	6	MM6	MM6: RAS Sensor_F.L.T.	RAS Sensor_F.L.T.	NarX = EF1a_RBDCRD-6xfL NarL = EF1a_Narl-F.L.T.	EF1a	EF1a_RBDCRD-6xfL		EF1a_Narl-F.L.T.	Fugene [3.5 µL/µg]	1.5x	AsPC-1-F	mutated	KRAS G12D	no	2	0.00308755	0.0486957	4.34	1405.64	15220	114	0.0056	775	2335	0.115	12223	0	0		0	0
30	AsPC-1-F_E3_E03_051.fcs	E_GS3_98_1_mCerulean_Plate_002-2	00:08:51	A	3	RAS Circuit	6	MM6	MM6: RAS Sensor_F.L.T.	RAS Sensor_F.L.T.	NarX = EF1a_RBDCRD-6xfL NarL = EF1a_Narl-F.L.T.	EF1a	EF1a_RBDCRD-6xfL		EF1a_Narl-F.L.T.	Fugene [3.5 µL/µg]	1.5x	AsPC-1-F	mutated	KRAS G12D	no	3	0.00292176	0.0428571	3.9504	1352.06	15878	100	0.0048	823	2338	0.112	12072	0	0		0	0
31	AsPC-1-F_E4_E04_052.fcs	E_GS3_98_1_mCerulean_Plate_002-2	00:09:58	A	4	RAS Circuit	10	MM10	MM10: PY2_NarL-F.L.T.	PY2_NarL-F.L.T.	NarX = EF1a_RBDCRD-6xfL NarL = PY2_NarL-F.L.T	PY2	EF1a_RBDCRD-6xfL		PY2_NarL-F.L.T	Fugene [3.5 µL/µg]	1.5x	AsPC-1-F	mutated	KRAS G12D	no	1	0.0011939	0.0314516	1.7706	1483.04	12259	67	0.0039	454	2098	0.124	11960	0	0		0	0
32	AsPC-1-F_E5_E05_053.fcs	E_GS3_98_1_mCerulean_Plate_002-2	00:11:06	A	5	RAS Circuit	10	MM10	MM10: PY2_NarL-F.L.T.	PY2_NarL-F.L.T.	NarX = EF1a_RBDCRD-6xfL NarL = PY2_NarL-F.L.T	PY2	EF1a_RBDCRD-6xfL		PY2_NarL-F.L.T	Fugene [3.5 µL/µg]	1.5x	AsPC-1-F	mutated	KRAS G12D	no	2	0.000820953	0.0301587	1.311	1596.92	12254	66	0.0038	345	2176	0.126	12674	0	0		0	0
33	AsPC-1-F_E6_E06_054.fcs	E_GS3_98_1_mCerulean_Plate_002-2	00:12:14	A	6	RAS Circuit	10	MM10	MM10: PY2_NarL-F.L.T.	PY2_NarL-F.L.T.	NarX = EF1a_RBDCRD-6xfL NarL = PY2_NarL-F.L.T	PY2	EF1a_RBDCRD-6xfL		PY2_NarL-F.L.T	Fugene [3.5 µL/µg]	1.5x	AsPC-1-F	mutated	KRAS G12D	no	3	0.000970132	0.0322314	1.4469	1491.45	13701	73	0.0039	371	2292	0.121	12326	0	0		0	0
34	AsPC-1-F_F4_F04_058.fcs	E_GS3_98_1_mCerulean_Plate_002-2	00:16:45	B	4	RAS Circuit	11	MM11	MM11: PY2_all_F.L.T.	PY2_all_F.L.T.	NarX = PY2_RBDCRD-6xfL NarL = PY2_NarL-F.L.T	PY2	PY2_RBDCRD-6xfL		PY2_NarL-F.L.T	Fugene [3.5 µL/µg]	1.5x	AsPC-1-F	mutated	KRAS G12D	no	1	0.00470737	0.0764706	5.3144	1128.95	10419	135	0.0091	584	1761	0.119	9487	0	0		0	0
35	AsPC-1-F_F5_F05_059.fcs	E_GS3_98_1_mCerulean_Plate_002-2	00:17:53	B	5	RAS Circuit	11	MM11	MM11: PY2_all_F.L.T.	PY2_all_F.L.T.	NarX = PY2_RBDCRD-6xfL NarL = PY2_NarL-F.L.T	PY2	PY2_RBDCRD-6xfL		PY2_NarL-F.L.T	Fugene [3.5 µL/µg]	1.5x	AsPC-1-F	mutated	KRAS G12D	no	2	0.00593304	0.0741071	6.6151	1114.96	9954	116	0.0083	797	1556	0.112	9955	0	0		0	0
36	AsPC-1-F_F6_F06_060.fcs	E_GS3_98_1_mCerulean_Plate_002-2	00:19:01	B	6	RAS Circuit	11	MM11	MM11: PY2_all_F.L.T.	PY2_all_F.L.T.	NarX = PY2_RBDCRD-6xfL NarL = PY2_NarL-F.L.T	PY2	PY2_RBDCRD-6xfL		PY2_NarL-F.L.T	Fugene [3.5 µL/µg]	1.5x	AsPC-1-F	mutated	KRAS G12D	no	3	0.00179769	0.0523013	1.335	742.621	10851	76	0.005	267	1452	0.0956	7768	0	0		0	0
37	AsPC-1-F_G1_G01_004.fcs	E_GS3_98_1_mCerulean_Plate_002-3	00:48:35	C	1	RAS Circuit	8	MM8	MM8: pFos_NarL-F.L.T.	pFos_NarL-F.L.T.	NarX = EF1a_RBDCRD-6xfL NarL = pFos_NarL-F.L.T	pFos	EF1a_RBDCRD-6xfL		pFos_NarL-F.L.T	Fugene [3.5 µL/µg]	1.5x	AsPC-1-F	mutated	KRAS G12D	no	1	0.00895126	0.107965	8.9426	999.033	1102	18	0.0122	733	167	0.113	8841	0	0		0	0
38	AsPC-1-F_G2_G02_005.fcs	E_GS3_98_1_mCerulean_Plate_002-3	00:49:13	C	2	RAS Circuit	8	MM8	MM8: pFos_NarL-F.L.T.	pFos_NarL-F.L.T.	NarX = EF1a_RBDCRD-6xfL NarL = pFos_NarL-F.L.T	pFos	EF1a_RBDCRD-6xfL		pFos_NarL-F.L.T	Fugene [3.5 µL/µg]	1.5x	AsPC-1-F	mutated	KRAS G12D	no	2	0.00220385	0.051938	3.2026	1453.18	1210	11	0.0067	478	210	0.129	11265	0	0		0	0
39	AsPC-1-F_G3_G03_006.fcs	E_GS3_98_1_mCerulean_Plate_002-3	00:49:52	C	3	RAS Circuit	8	MM8	MM8: pFos_NarL-F.L.T.	pFos_NarL-F.L.T.	NarX = EF1a_RBDCRD-6xfL NarL = pFos_NarL-F.L.T	pFos	EF1a_RBDCRD-6xfL		pFos_NarL-F.L.T	Fugene [3.5 µL/µg]	1.5x	AsPC-1-F	mutated	KRAS G12D	no	3	0.00446227	0.106818	6.1476	1377.68	1149	22	0.0141	436	206	0.132	10437	0	0		0	0
40	AsPC-1-F_G4_G04_007.fcs	E_GS3_98_1_mCerulean_Plate_002-3	00:50:30	C	4	Control	12	MM12	MM12: RBDr89lCRDc168S_Sensor	RBDr89lCRDc168S_Sensor	NarX = EF1a_RBDr89lCRDc168s NarL = EF1a_Narl-F.L.T.	EF1a	EF1a_RBDr89lCRDc168s		EF1a_Narl-F.L.T.	Fugene [3.5 µL/µg]	1.5x	AsPC-1-F	mutated	KRAS G12D	no	1	0.000765022	0.0173127	0.42947	561.382	2698	2	0.00067	641	116	0.0387	14506	0	0		0	0
41	AsPC-1-F_G5_G05_008.fcs	E_GS3_98_1_mCerulean_Plate_002-3	00:51:09	C	5	Control	12	MM12	MM12: RBDr89lCRDc168S_Sensor	RBDr89lCRDc168S_Sensor	NarX = EF1a_RBDr89lCRDc168s NarL = EF1a_Narl-F.L.T.	EF1a	EF1a_RBDr89lCRDc168s		EF1a_Narl-F.L.T.	Fugene [3.5 µL/µg]	1.5x	AsPC-1-F	mutated	KRAS G12D	no	2	0.000106277	0.011811	0.1905	1792.48	1448	3	0.0015	127	253	0.127	14114	0	0		0	0
42	AsPC-1-F_G6_G06_009.fcs	E_GS3_98_1_mCerulean_Plate_002-3	00:51:47	C	6	Control	12	MM12	MM12: RBDr89lCRDc168S_Sensor	RBDr89lCRDc168S_Sensor	NarX = EF1a_RBDr89lCRDc168s NarL = EF1a_Narl-F.L.T.	EF1a	EF1a_RBDr89lCRDc168s		EF1a_Narl-F.L.T.	Fugene [3.5 µL/µg]	1.5x	AsPC-1-F	mutated	KRAS G12D	no	3	0.00012043	0.00386364	0.20553	1706.63	1418	1	0.00051	403	257	0.132	12929	0	0		0	0
43	AsPC-1-F_H1_H01_010.fcs	E_GS3_98_1_mCerulean_Plate_002-3	00:52:26	D	1	RAS Circuit	9	MM9	MM9: SRE_NarL-F.L.T.	SRE_NarL-F.L.T.	NarX = EF1a_RBDCRD-6xfL NarL = SRE_NarL-F.L.T	SRE	EF1a_RBDCRD-6xfL		SRE_NarL-F.L.T	Fugene [3.5 µL/µg]	1.5x	AsPC-1-F	mutated	KRAS G12D	no	1	0.00755426	0.159016	9.7194	1286.61	1143	30	0.0194	501	189	0.122	10546	0	0		0	0
44	AsPC-1-F_H2_H02_011.fcs	E_GS3_98_1_mCerulean_Plate_002-3	00:53:04	D	2	RAS Circuit	9	MM9	MM9: SRE_NarL-F.L.T.	SRE_NarL-F.L.T.	NarX = EF1a_RBDCRD-6xfL NarL = SRE_NarL-F.L.T	SRE	EF1a_RBDCRD-6xfL		SRE_NarL-F.L.T	Fugene [3.5 µL/µg]	1.5x	AsPC-1-F	mutated	KRAS G12D	no	2	0.00664411	0.13609	8.9595	1348.49	1158	29	0.0181	495	213	0.133	10139	0	0		1	0.00086	16267
45	AsPC-1-F_H3_H03_012.fcs	E_GS3_98_1_mCerulean_Plate_002-3	00:53:45	D	3	RAS Circuit	9	MM9	MM9: SRE_NarL-F.L.T.	SRE_NarL-F.L.T.	NarX = EF1a_RBDCRD-6xfL NarL = SRE_NarL-F.L.T	SRE	EF1a_RBDCRD-6xfL		SRE_NarL-F.L.T	Fugene [3.5 µL/µg]	1.5x	AsPC-1-F	mutated	KRAS G12D	no	3	0.0102926	0.147581	13.9446	1354.82	3460	89	0.0183	762	603	0.124	10926	0	0		0	0
46	AsPC-1-F_D4_D04_028.fcs	E_GS3_98_1_mScarlet_Plate_003	19:32:06	A	4	MAPK Sensor	15	MM15	MM15: pFos_mScarlet	pFos_mScarlet	NarX = pFos_mScarlet NarL = 0	pFos	pFos_mScarlet		0	Fugene [3.5 µL/µg]	1.5x	AsPC-1-F	mutated	KRAS G12D	no	1	0.00765405	0.247956	2.3933	312.684	23925	0	0		0	0		217	0.0091	263	878	0.0367	8520
47	AsPC-1-F_D5_D05_029.fcs	E_GS3_98_1_mScarlet_Plate_003	19:33:14	A	5	MAPK Sensor	15	MM15	MM15: pFos_mScarlet	pFos_mScarlet	NarX = pFos_mScarlet NarL = 0	pFos	pFos_mScarlet		0	Fugene [3.5 µL/µg]	1.5x	AsPC-1-F	mutated	KRAS G12D	no	2	0.00513468	0.201657	1.4673	285.763	25345	0	0		0	0		185	0.0073	201	917	0.0362	7894
48	AsPC-1-F_D6_D06_030.fcs	E_GS3_98_1_mScarlet_Plate_003	19:34:22	A	6	MAPK Sensor	15	MM15	MM15: pFos_mScarlet	pFos_mScarlet	NarX = pFos_mScarlet NarL = 0	pFos	pFos_mScarlet		0	Fugene [3.5 µL/µg]	1.5x	AsPC-1-F	mutated	KRAS G12D	no	3	0.0052275	0.219839	1.5088	288.627	24169	0	0		0	0		198	0.0082	184	901	0.0373	7738
49	AsPC-1-F_D7_D07_031.fcs	E_GS3_98_1_mScarlet_Plate_003	19:35:29	B	1	MAPK Sensor	16	MM16	MM16: PY2_mScarlet	PY2_mScarlet	NarX = PY2_mScarlet NarL = 0	PY2	PY2_mScarlet		0	Fugene [3.5 µL/µg]	1.5x	AsPC-1-F	mutated	KRAS G12D	no	1	0.000742756	0.0309598	0.192	258.497	24616	0	0		0	0		25	0.001	192	796	0.0323	8003
50	AsPC-1-F_D8_D08_032.fcs	E_GS3_98_1_mScarlet_Plate_003	19:36:38	B	2	MAPK Sensor	16	MM16	MM16: PY2_mScarlet	PY2_mScarlet	NarX = PY2_mScarlet NarL = 0	PY2	PY2_mScarlet		0	Fugene [3.5 µL/µg]	1.5x	AsPC-1-F	mutated	KRAS G12D	no	2	0.00133758	0.0384615	0.4368	326.56	21301	0	0		0	0		34	0.0016	273	887	0.0416	7850
51	AsPC-1-F_D9_D09_033.fcs	E_GS3_98_1_mScarlet_Plate_003	19:37:46	B	3	MAPK Sensor	16	MM16	MM16: PY2_mScarlet	PY2_mScarlet	NarX = PY2_mScarlet NarL = 0	PY2	PY2_mScarlet		0	Fugene [3.5 µL/µg]	1.5x	AsPC-1-F	mutated	KRAS G12D	no	3	0.00168136	0.0521542	0.6026	358.401	20718	0	0		0	0		48	0.0023	262	913	0.0441	8127
52	AsPC-1-F_D10_D10_034.fcs	E_GS3_98_1_mScarlet_Plate_003	19:38:54	B	4	MAPK Sensor	17	MM17	MM17: SRE_mScarlet	SRE_mScarlet	NarX = SRE_mScarlet NarL = 0	SRE	SRE_mScarlet		0	Fugene [3.5 µL/µg]	1.5x	AsPC-1-F	mutated	KRAS G12D	no	1	0.00415503	0.170115	1.6576	398.938	24733	0	0		0	0		184	0.0074	224	1077	0.0435	9171
53	AsPC-1-F_D11_D11_035.fcs	E_GS3_98_1_mScarlet_Plate_003	19:40:03	B	5	MAPK Sensor	17	MM17	MM17: SRE_mScarlet	SRE_mScarlet	NarX = SRE_mScarlet NarL = 0	SRE	SRE_mScarlet		0	Fugene [3.5 µL/µg]	1.5x	AsPC-1-F	mutated	KRAS G12D	no	2	0.00330112	0.147806	1.1072	335.402	25374	0	0		0	0		162	0.0064	173	1098	0.0433	7746
54	AsPC-1-F_D12_D12_036.fcs	E_GS3_98_1_mScarlet_Plate_003	19:41:12	B	6	MAPK Sensor	17	MM17	MM17: SRE_mScarlet	SRE_mScarlet	NarX = SRE_mScarlet NarL = 0	SRE	SRE_mScarlet		0	Fugene [3.5 µL/µg]	1.5x	AsPC-1-F	mutated	KRAS G12D	no	3	0.00457385	0.173034	1.7325	378.784	22850	0	0		0	0		175	0.0077	225	1017	0.0445	8512
55	HCTwt_E1_E01_049.fcs	E_GS3_98_1_mCerulean_Plate_001	16:53:23	A	1	RAS Circuit	6	MM6	MM6: RAS Sensor_F.L.T.	RAS Sensor_F.L.T.	NarX = EF1a_RBDCRD-6xfL NarL = EF1a_Narl-F.L.T.	EF1a	EF1a_RBDCRD-6xfL		EF1a_Narl-F.L.T.	Fugene [3 µL/µg]	0.5x	HCT-116_KRAS-wt	mutated	KRAS G13D	no	1	0.0128504	0.293985	100.252	7801.51		4390	0.0782	1282	14899	0.266	29329	0	0		16	0.0004	1052
56	HCTwt_E2_E02_050.fcs	E_GS3_98_1_mCerulean_Plate_001	16:54:32	A	2	RAS Circuit	6	MM6	MM6: RAS Sensor_F.L.T.	RAS Sensor_F.L.T.	NarX = EF1a_RBDCRD-6xfL NarL = EF1a_Narl-F.L.T.	EF1a	EF1a_RBDCRD-6xfL		EF1a_Narl-F.L.T.	Fugene [3 µL/µg]	0.5x	HCT-116_KRAS-wt	mutated	KRAS G13D	no	2	0.0108316	0.273401	96.0596	8868.42		4005	0.0812	1183	14645	0.297	29860	0	0		17	0.00051	1055
57	HCTwt_E3_E03_051.fcs	E_GS3_98_1_mCerulean_Plate_001	16:55:40	A	3	RAS Circuit	6	MM6	MM6: RAS Sensor_F.L.T.	RAS Sensor_F.L.T.	NarX = EF1a_RBDCRD-6xfL NarL = EF1a_Narl-F.L.T.	EF1a	EF1a_RBDCRD-6xfL		EF1a_Narl-F.L.T.	Fugene [3 µL/µg]	0.5x	HCT-116_KRAS-wt	mutated	KRAS G13D	no	3	0.0103055	0.270253	96.3312	9347.6		4650	0.0854	1128	17204	0.316	29581	0	0		20	0.00056	1042
58	HCTwt_E4_E04_052.fcs	E_GS3_98_1_mCerulean_Plate_001	16:56:48	A	4	RAS Circuit	10	MM10	MM10: PY2_NarL-F.L.T.	PY2_NarL-F.L.T.	NarX = EF1a_RBDCRD-6xfL NarL = PY2_NarL-F.L.T	PY2	EF1a_RBDCRD-6xfL		PY2_NarL-F.L.T	Fugene [3 µL/µg]	0.5x	HCT-116_KRAS-wt	mutated	KRAS G13D	no	1	0.00694175	0.224516	60.9	8773		3921	0.0696	875	17472	0.31	28300	0	0		24	0.00065	1069
59	HCTwt_E5_E05_053.fcs	E_GS3_98_1_mCerulean_Plate_001	16:57:56	A	5	RAS Circuit	10	MM10	MM10: PY2_NarL-F.L.T.	PY2_NarL-F.L.T.	NarX = EF1a_RBDCRD-6xfL NarL = PY2_NarL-F.L.T	PY2	EF1a_RBDCRD-6xfL		PY2_NarL-F.L.T	Fugene [3 µL/µg]	0.5x	HCT-116_KRAS-wt	mutated	KRAS G13D	no	2	0.00712841	0.217857	59.719	8377.6		3615	0.0671	890	16574	0.308	27200	0	0		15	0.00042	1068
60	HCTwt_E6_E06_054.fcs	E_GS3_98_1_mCerulean_Plate_001	16:59:05	A	6	RAS Circuit	10	MM10	MM10: PY2_NarL-F.L.T.	PY2_NarL-F.L.T.	NarX = EF1a_RBDCRD-6xfL NarL = PY2_NarL-F.L.T	PY2	EF1a_RBDCRD-6xfL		PY2_NarL-F.L.T	Fugene [3 µL/µg]	0.5x	HCT-116_KRAS-wt	mutated	KRAS G13D	no	3	0.00687386	0.212585	54.5	7928.59		3506	0.0625	872	16511	0.294	26968	0	0		14	0.00037	1046
61	HCTwt_F4_F04_058.fcs	E_GS3_98_1_mCerulean_Plate_001	17:03:38	B	4	RAS Circuit	11	MM11	MM11: PY2_all_F.L.T.	PY2_all_F.L.T.	NarX = PY2_RBDCRD-6xfL NarL = PY2_NarL-F.L.T	PY2	PY2_RBDCRD-6xfL		PY2_NarL-F.L.T	Fugene [3 µL/µg]	0.5x	HCT-116_KRAS-wt	mutated	KRAS G13D	no	1	0.00525519	0.204074	38.57	7339.41		2668	0.0551	700	13075	0.27	27183	0	0		13	0.00039	1064
62	HCTwt_F5_F05_059.fcs	E_GS3_98_1_mCerulean_Plate_001	17:04:46	B	5	RAS Circuit	11	MM11	MM11: PY2_all_F.L.T.	PY2_all_F.L.T.	NarX = PY2_RBDCRD-6xfL NarL = PY2_NarL-F.L.T	PY2	PY2_RBDCRD-6xfL		PY2_NarL-F.L.T	Fugene [3 µL/µg]	0.5x	HCT-116_KRAS-wt	mutated	KRAS G13D	no	2	0.00537189	0.201145	37.1535	6916.28		2806	0.0527	705	13946	0.262	26398	1	2.68E−3%	331	14	0.00037	1048
63	HCTwt_F6_F06_060.fcs	E_GS3_98_1_mCerulean_Plate_001	17:05:54	B	6	RAS Circuit	11	MM11	MM11: PY2_all_F.L.T.	PY2_all_F.L.T.	NarX = PY2_RBDCRD-6xfL NarL = PY2_NarL-F.L.T	PY2	PY2_RBDCRD-6xfL		PY2_NarL-F.L.T	Fugene [3 µL/µg]	0.5x	HCT-116_KRAS-wt	mutated	KRAS G13D	no	3	0.00549054	0.199611	36.3717	6624.43		2725	0.0513	709	13654	0.257	25776	0	0		15	0.0004	1038
64	HCTwt_G1_G01_061.fcs	E_GS3_98_1_mCerulean_Plate_001	17:07:03	C	1	RAS Circuit	8	MM8	MM8: pFos_NarL-F.L.T.	pFos_NarL-F.L.T.	NarX = EF1a_RBDCRD-6xfL NarL = pFos_NarL-F.L.T	pFos	EF1a_RBDCRD-6xfL		pFos_NarL-F.L.T	Fugene [3 µL/µg]	0.5x	HCT-116_KRAS-wt	mutated	KRAS G13D	no	1	0.00760567	0.23543	70.4601	9264.15		3206	0.0711	991	13631	0.302	30676	0	0		14	0.00046	1067
65	HCTwt_G2_G02_062.fcs	E_GS3_98_1_mCerulean_Plate_001	17:08:11	C	2	RAS Circuit	8	MM8	MM8: pFos_NarL-F.L.T.	pFos_NarL-F.L.T.	NarX = EF1a_RBDCRD-6xfL NarL = pFos_NarL-F.L.T	pFos	EF1a_RBDCRD-6xfL		pFos_NarL-F.L.T	Fugene [3 µL/µg]	0.5x	HCT-116_KRAS-wt	mutated	KRAS G13D	no	2	0.00698859	0.216294	64.4504	9222.23		3420	0.0677	952	15787	0.313	29464	0	0		10	0.0003	1079
66	HCTwt_G3_G03_063.fcs	E_GS3_98_1_mCerulean_Plate_001	17:09:19	C	3	RAS Circuit	8	MM8	MM8: pFos_NarL-F.L.T.	pFos_NarL-F.L.T.	NarX = EF1a_RBDCRD-6xfL NarL = pFos_NarL-F.L.T	pFos	EF1a_RBDCRD-6xfL		pFos_NarL-F.L.T	Fugene [3 µL/µg]	0.5x	HCT-116_KRAS-wt	mutated	KRAS G13D	no	3	0.00658966	0.212461	60.698	9211.09		3448	0.0682	890	16227	0.321	28695	0	0		15	0.00046	1024
67	HCTwt_G4_G04_064.fcs	E_GS3_98_1_mCerulean_Plate_001	17:10:27	C	4	Control	12	MM12	MM12: RBDr89lCRDc168S_Sensor	RBDr89lCRDc168S_Sensor	NarX = EF1a_RBDr89lCRDc168s NarL = EF1a_Narl-F.L.T.	EF1a	EF1a_RBDr89lCRDc168s		EF1a_Narl-F.L.T.	Fugene [3 µL/µg]	0.5x	HCT-116_KRAS-wt	mutated	KRAS G13D	no	1	0.000118838	0.0146875	1.3489	11350.7		249	0.0047	287	17100	0.32	35471	0	0		17	0.00049	1036
68	HCTwt_G5_G05_065.fcs	E_GS3_98_1_mCerulean_Plate_001	17:11:36	C	5	Control	12	MM12	MM12: RBDr89lCRDc168S_Sensor	RBDr89lCRDc168S_Sensor	NarX = EF1a_RBDr89lCRDc168s NarL = EF1a_Narl-F.L.T.	EF1a	EF1a_RBDr89lCRDc168s		EF1a_Narl-F.L.T.	Fugene [3 µL/µg]	0.5x	HCT-116_KRAS-wt	mutated	KRAS G13D	no	2	0.000122344	0.0157377	1.2624	10318.5		314	0.0048	263	19780	0.305	33831	0	0		12	0.00028	1044
69	HCTwt_G6_G06_066.fcs	E_GS3_98_1_mCerulean_Plate_001	17:12:44	C	6	Control	12	MM12	MM12: RBDr89lCRDc168S_Sensor	RBDr89lCRDc168S_Sensor	NarX = EF1a_RBDr89lCRDc168s NarL = EF1a_Narl-F.L.T.	EF1a	EF1a_RBDr89lCRDc168s		EF1a_Narl-F.L.T.	Fugene [3 µL/µg]	0.5x	HCT-116_KRAS-wt	mutated	KRAS G13D	no	3	0.000127984	0.0146758	1.2599	9844.21		297	0.0043	293	20075	0.293	33598	0	0		16	0.00035	1049
70	HCTwt_H1_H01_067.fcs	E_GS3_98_1_mCerulean_Plate_001	17:13:53	D	1	RAS Circuit	9	MM9	MM9: SRE_NarL-F.L.T.	SRE_NarL-F.L.T.	NarX = EF1a_RBDCRD-6xfL NarL = SRE_NarL-F.L.T	SRE	EF1a_RBDCRD-6xfL		SRE_NarL-F.L.T	Fugene [3 µL/µg]	0.5x	HCT-116_KRAS-wt	mutated	KRAS G13D	no	1	0.00365578	0.121613	33.7415	9229.63		1749	0.0377	895	14357	0.31	29773	1	3.30E−3%	379	11	0.00036	1048
71	HCTwt_H2_H02_068.fcs	E_GS3_98_1_mCerulean_Plate_001	17:15:01	D	2	RAS Circuit	9	MM9	MM9: SRE_NarL-F.L.T.	SRE_NarL-F.L.T.	NarX = EF1a_RBDCRD-6xfL NarL = SRE_NarL-F.L.T	SRE	EF1a_RBDCRD-6xfL		SRE_NarL-F.L.T	Fugene [3 µL/µg]	0.5x	HCT-116_KRAS-wt	mutated	KRAS G13D	no	2	0.00362455	0.129781	34.569	9537.46		1888	0.0414	835	14548	0.319	29898	0	0		17	0.00058	1048
72	HCTwt_H3_H03_069.fcs	E_GS3_98_1_mCerulean_Plate_001	17:16:09	D	3	RAS Circuit	9	MM9	MM9: SRE_NarL-F.L.T.	SRE_NarL-F.L.T.	NarX = EF1a_RBDCRD-6xfL NarL = SRE_NarL-F.L.T	SRE	EF1a_RBDCRD-6xfL		SRE_NarL-F.L.T	Fugene [3 µL/µg]	0.5x	HCT-116_KRAS-wt	mutated	KRAS G13D	no	3	0.00346666	0.128614	34.0319	9816.91		2195	0.0427	797	17063	0.332	29569	0	0		16	0.00049	1055
73	HCTwt_C1_C01_019.fcs	E_GS3_98_1_mScarlet_Plate_005	23:57:20	A	4	MAPK Sensor	15	MM15	MM15: pFos_mScarlet	pFos_mScarlet	NarX = pFos_mScarlet NarL = 0	pFos	pFos_mScarlet		0	Fugene [3 µL/µg]	0.5x	HCT-116_KRAS-wt	mutated	KRAS G13D	no	1	0.0106951	0.399441	0	13210.2		0	0		0	0		6466	0.143	988	16213	0.358	36900
74	HCTwt_C2_C02_020.fcs	E_GS3_98_1_mScarlet_Plate_005	23:58:28	A	5	MAPK Sensor	15	MM15	MM15: pFos_mScarlet	pFos_mScarlet	NarX = pFos_mScarlet NarL = 0	pFos	pFos_mScarlet		0	Fugene [3 µL/µg]	0.5x	HCT-116_KRAS-wt	mutated	KRAS G13D	no	2	0.0108143	0.390029	0	12298.5		0	0		0	0		6593	0.133	1000	16936	0.341	36066
75	HCTwt_C3_C03_021.fcs	E_GS3_98_1_mScarlet_Plate_005	23:59:36	A	6	MAPK Sensor	15	MM15	MM15: pFos_mScarlet	pFos_mScarlet	NarX = pFos_mScarlet NarL = 0	pFos	pFos_mScarlet		0	Fugene [3 µL/µg]	0.5x	HCT-116_KRAS-wt	mutated	KRAS G13D	no	3	0.0105383	0.389728	0	12216.5		0	0		0	0		7443	0.129	998	19124	0.331	36908
76	HCTwt_C4_C04_022.fcs	E_GS3_98_1_mScarlet_Plate_005	00:00:44	B	1	MAPK Sensor	16	MM16	MM16: PY2_mScarlet	PY2_mScarlet	NarX = PY2_mScarlet NarL = 0	PY2	PY2_mScarlet		0	Fugene [3 µL/µg]	0.5x	HCT-116_KRAS-wt	mutated	KRAS G13D	no	1	0.0166855	0.408805	0	11718		0	0		0	0		5722	0.13	1504	14028	0.318	36849
77	HCTwt_C5_C05_023.fcs	E_GS3_98_1_mScarlet_Plate_005	00:01:52	B	2	MAPK Sensor	16	MM16	MM16: PY2_mScarlet	PY2_mScarlet	NarX = PY2_mScarlet NarL = 0	PY2	PY2_mScarlet		0	Fugene [3 µL/µg]	0.5x	HCT-116_KRAS-wt	mutated	KRAS G13D	no	2	0.017398	0.396226	0	11037.1		0	0		0	0		6027	0.126	1524	15263	0.318	34708
78	HCTwt_C6_C06_024.fcs	E_GS3_98_1_mScarlet_Plate_005	00:03:00	B	3	MAPK Sensor	16	MM16	MM16: PY2_mScarlet	PY2_mScarlet	NarX = PY2_mScarlet NarL = 0	PY2	PY2_mScarlet		0	Fugene [3 µL/µg]	0.5x	HCT-116_KRAS-wt	mutated	KRAS G13D	no	3	0.0170875	0.399399	0	11558.4		0	0		0	0		6013	0.133	1485	14989	0.333	34710
79	HCTwt_C7_C07_025.fcs	E_GS3_98_1_mScarlet_Plate_005	00:04:07	B	4	MAPK Sensor	17	MM17	MM17: SRE_mScarlet	SRE_mScarlet	NarX = SRE_mScarlet NarL = 0	SRE	SRE_mScarlet		0	Fugene [3 µL/µg]	0.5x	HCT-116_KRAS-wt	mutated	KRAS G13D	no	1	0.00722546	0.227134	0	12342		0	0		0	0		3535	0.0745	1197	15554	0.328	37628
80	HCTwt_C8_C08_026.fcs	E_GS3_98_1_mScarlet_Plate_005	00:05:15	B	5	MAPK Sensor	17	MM17	MM17: SRE_mScarlet	SRE_mScarlet	NarX = SRE_mScarlet NarL = 0	SRE	SRE_mScarlet		0	Fugene [3 µL/µg]	0.5x	HCT-116_KRAS-wt	mutated	KRAS G13D	no	2	0.00736685	0.235758	0	12630.8		0	0		0	0		3611	0.0778	1196	15316	0.33	38275
81	HCTwt_C9_C09_027.fcs	E_GS3_98_1_mScarlet_Plate_005	00:06:23	B	6	MAPK Sensor	17	MM17	MM17: SRE_mScarlet	SRE_mScarlet	NarX = SRE_mScarlet NarL = 0	SRE	SRE_mScarlet		0	Fugene [3 µL/µg]	0.5x	HCT-116_KRAS-wt	mutated	KRAS G13D	no	3	0.00708796	0.231003	0	13210		0	0		0	0		3000	0.076	1232	12988	0.329	40152
82	HeLa-F_E1_E01_001.fcs	E_GS3_98_1_mCerulean_Plate_002-2	19:51:23	A	1	RAS Circuit	6	MM6	MM6: RAS Sensor_F.L.T.	RAS Sensor_F.L.T.	NarX = EF1a_RBDCRD-6xfL NarL = EF1a_Narl-F.L.T.	EF1a	EF1a_RBDCRD-6xfL		EF1a_Narl-F.L.T.	Fugene [3 µL/µg]	1.5x	HeLa-F	wildtype	wt	yes	1	0.00033346	0.0191176	2.9445	8830.14		129	0.0065	453	6729	0.34	25971	59	0.0057	178677	61	0.0058	1326
83	HeLa-F_E2_E02_002.fcs	E_GS3_98_1_mCerulean_Plate_002-2	19:52:31	A	2	RAS Circuit	6	MM6	MM6: RAS Sensor_F.L.T.	RAS Sensor_F.L.T.	NarX = EF1a_RBDCRD-6xfL NarL = EF1a_Narl-F.L.T.	EF1a	EF1a_RBDCRD-6xfL		EF1a_Narl-F.L.T.	Fugene [3 µL/µg]	1.5x	HeLa-F	wildtype	wt	yes	2	0.000565388	0.021813	5.2514	9288.14		283	0.0077	682	12969	0.353	26312	117	0.0059	178562	133	0.0067	1394
84	HeLa-F_E3_E03_003.fcs	E_GS3_98_1_mCerulean_Plate_002-2	19:53:39	A	3	RAS Circuit	6	MM6	MM6: RAS Sensor_F.L.T.	RAS Sensor_F.L.T.	NarX = EF1a_RBDCRD-6xfL NarL = EF1a_Narl-F.L.T.	EF1a	EF1a_RBDCRD-6xfL		EF1a_Narl-F.L.T.	Fugene [3 µL/µg]	1.5x	HeLa-F	wildtype	wt	yes	3	0.000438517	0.0207831	3.7467	8544.02		271	0.0069	543	13009	0.332	25735	97	0.0045	177059	109	0.005	1358
85	HeLa-F_E4_E04_004.fcs	E_GS3_98_1_mCerulean_Plate_002-2	19:54:47	A	4	RAS Circuit	10	MM10	MM10: PY2_NarL-F.L.T.	PY2_NarL-F.L.T.	NarX = EF1a_RBDCRD-6xfL NarL = PY2_NarL-F.L.T	PY2	EF1a_RBDCRD-6xfL		PY2_NarL-F.L.T	Fugene [3 µL/µg]	1.5x	HeLa-F	wildtype	wt	yes	1	0.000226662	0.0186544	1.9886	8773.41		269	0.0061	326	14427	0.327	26830	138	0.0059	179026	149	0.0064	1355
86	HeLa-F_E5_E05_005.fcs	E_GS3_98_1_mCerulean_Plate_002-2	19:55:55	A	5	RAS Circuit	10	MM10	MM10: PY2_NarL-F.L.T.	PY2_NarL-F.L.T.	NarX = EF1a_RBDCRD-6xfL NarL = PY2_NarL-F.L.T	PY2	EF1a_RBDCRD-6xfL		PY2_NarL-F.L.T	Fugene [3 µL/µg]	1.5x	HeLa-F	wildtype	wt	yes	2	0.000381852	0.0205438	3.4068	8921.77		208	0.0068	501	10088	0.331	26954	105	0.0063	179684	113	0.0068	1367
87	HeLa-F_E6_E06_006.fcs	E_GS3_98_1_mCerulean_Plate_002-2	19:57:04	A	6	RAS Circuit	10	MM10	MM10: PY2_NarL-F.L.T.	PY2_NarL-F.L.T.	NarX = EF1a_RBDCRD-6xfL NarL = PY2_NarL-F.L.T	PY2	EF1a_RBDCRD-6xfL		PY2_NarL-F.L.T	Fugene [3 µL/µg]	1.5x	HeLa-F	wildtype	wt	yes	3	0.000323901	0.0200599	2.8609	8832.63		258	0.0067	427	12936	0.334	26445	115	0.0059	176205	119	0.0061	1341
88	HeLa-F_F4_F04_010.fcs	E_GS3_98_1_mCerulean_Plate_002-2	20:01:36	B	4	RAS Circuit	11	MM11	MM11: PY2_all_F.L.T.	PY2_all_F.L.T.	NarX = PY2_RBDCRD-6xfL NarL = PY2_NarL-F.L.T	PY2	PY2_RBDCRD-6xfL		PY2_NarL-F.L.T	Fugene [3 µL/µg]	1.5x	HeLa-F	wildtype	wt	yes	1	0.0018698	0.0535604	16.4696	8808.21		614	0.0173	952	11453	0.323	27270	170	0.0092	183476	180	0.0097	1434
89	HeLa-F_F5_F05_011.fcs	E_GS3_98_1_mCerulean_Plate_002-2	20:02:45	B	5	RAS Circuit	11	MM11	MM11: PY2_all_F.L.T.	PY2_all_F.L.T.	NarX = PY2_RBDCRD-6xfL NarL = PY2_NarL-F.L.T	PY2	PY2_RBDCRD-6xfL		PY2_NarL-F.L.T	Fugene [3 µL/µg]	1.5x	HeLa-F	wildtype	wt	yes	2	0.00193304	0.0589666	17.2272	8911.95		550	0.0194	888	9333	0.329	27088	149	0.0094	181458	155	0.0098	1409
90	HeLa-F_F6_F06_012.fcs	E_GS3_98_1_mCerulean_Plate_002-2	20:03:53	B	6	RAS Circuit	11	MM11	MM11: PY2_all_F.L.T.	PY2_all_F.L.T.	NarX = PY2_RBDCRD-6xfL NarL = PY2_NarL-F.L.T	PY2	PY2_RBDCRD-6xfL		PY2_NarL-F.L.T	Fugene [3 µL/µg]	1.5x	HeLa-F	wildtype	wt	yes	3	0.00235021	0.0634006	21.538	9164.27		863	0.022	979	13630	0.347	26410	177	0.0087	180801	190	0.0093	1406
91	HeLa-F_G1_G01_013.fcs	E_GS3_98_1_mCerulean_Plate_002-2	20:05:01	C	1	RAS Circuit	8	MM8	MM8: pFos_NarL-F.L.T.	pFos_NarL-F.L.T.	NarX = EF1a_RBDCRD-6xfL NarL = pFos_NarL-F.L.T	pFos	EF1a_RBDCRD-6xfL		pFos_NarL-F.L.T	Fugene [3 µL/µg]	1.5x	HeLa-F	wildtype	wt	yes	1	0.000449782	0.0220544	3.9274	8731.78		233	0.0073	538	10521	0.331	26380	111	0.0069	175574	121	0.0075	1322
92	HeLa-F_G2_G02_014.fcs	E_GS3_98_1_mCerulean_Plate_002-2	20:06:09	C	2	RAS Circuit	8	MM8	MM8: pFos_NarL-F.L.T.	pFos_NarL-F.L.T.	NarX = EF1a_RBDCRD-6xfL NarL = pFos_NarL-F.L.T	pFos	EF1a_RBDCRD-6xfL		pFos_NarL-F.L.T	Fugene [3 µL/µg]	1.5x	HeLa-F	wildtype	wt	yes	2	0.000648007	0.0284507	6.3731	9834.92		405	0.0101	631	14211	0.355	27704	166	0.0081	181050	170	0.0083	1367
93	HeLa-F_G3_G03_015.fcs	E_GS3_98_1_mCerulean_Plate_002-2	20:07:18	C	3	RAS Circuit	8	MM8	MM8: pFos_NarL-F.L.T.	pFos_NarL-F.L.T.	NarX = EF1a_RBDCRD-6xfL NarL = pFos_NarL-F.L.T	pFos	EF1a_RBDCRD-6xfL		pFos_NarL-F.L.T	Fugene [3 µL/µg]	1.5x	HeLa-F	wildtype	wt	yes	3	0.000507696	0.0278932	4.5966	9053.84		378	0.0094	489	13510	0.337	26866	143	0.0065	174751	158	0.0072	1351
94	HeLa-F_G4_G04_016.fcs	E_GS3_98_1_mCerulean_Plate_002-2	20:08:26	C	4	Control	12	MM12	MM12: RBDr89lCRDc168S_Sensor	RBDr89lCRDc168S_Sensor	NarX = EF1a_RBDr89lCRDc168s NarL = EF1a_Narl-F.L.T.	EF1a	EF1a_RBDr89lCRDc168s		EF1a_Narl-F.L.T.	Fugene [3 µL/µg]	1.5x	HeLa-F	wildtype	wt	yes	1	3.36276e-05	0.00884956	0.2997	8912.31		122	0.003	99.9	13937	0.339	26290	124	0.006	178490	132	0.0064	1301
95	HeLa-F_G5_G05_017.fcs	E_GS3_98_1_mCerulean_Plate_002-2	20:09:34	C	5	Control	12	MM12	MM12: RBDr89lCRDc168S_Sensor	RBDr89lCRDc168S_Sensor	NarX = EF1a_RBDr89lCRDc168s NarL = EF1a_Narl-F.L.T.	EF1a	EF1a_RBDr89lCRDc168s		EF1a_Narl-F.L.T.	Fugene [3 µL/µg]	1.5x	HeLa-F	wildtype	wt	yes	2	4.06595e-05	0.0109467	0.37	9099.97		130	0.0037	100	11870	0.338	26923	116	0.0067	172430	128	0.0074	1314
96	HeLa-F_G6_G06_018.fcs	E_GS3_98_1_mCerulean_Plate_002-2	20:10:42	C	6	Control	12	MM12	MM12: RBDr89lCRDc168S_Sensor	RBDr89lCRDc168S_Sensor	NarX = EF1a_RBDr89lCRDc168s NarL = EF1a_Narl-F.L.T.	EF1a	EF1a_RBDr89lCRDc168s		EF1a_Narl-F.L.T.	Fugene [3 µL/µg]	1.5x	HeLa-F	wildtype	wt	yes	3	4.19867e-05	0.0104938	0.3502	8340.73		129	0.0034	103	12298	0.324	25743	95	0.0044	181449	105	0.0049	1303
97	HeLa-F_H1_H01_019.fcs	E_GS3_98_1_mCerulean_Plate_002-2	20:11:50	D	1	RAS Circuit	9	MM9	MM9: SRE_NarL-F.L.T.	SRE_NarL-F.L.T.	NarX = EF1a_RBDCRD-6xfL NarL = SRE_NarL-F.L.T	SRE	EF1a_RBDCRD-6xfL		SRE_NarL-F.L.T	Fugene [3 µL/µg]	1.5x	HeLa-F	wildtype	wt	yes	1	0.000131458	0.0112583	0.9962	7578.09		72	0.0034	293	6361	0.302	25093	59	0.0047	174054	65	0.0052	1269
98	HeLa-F_H2_H02_020.fcs	E_GS3_98_1_mCerulean_Plate_002-2	20:12:58	D	2	RAS Circuit	9	MM9	MM9: SRE_NarL-F.L.T.	SRE_NarL-F.L.T.	NarX = EF1a_RBDCRD-6xfL NarL = SRE_NarL-F.L.T	SRE	EF1a_RBDCRD-6xfL		SRE_NarL-F.L.T	Fugene [3 µL/µg]	1.5x	HeLa-F	wildtype	wt	yes	2	0.000116115	0.0145349	1.13	9731.76		190	0.005	226	13010	0.344	28290	182	0.0088	179785	191	0.0093	1328
99	HeLa-F_H3_H03_021.fcs	E_GS3_98_1_mCerulean_Plate_002-2	20:14:07	D	3	RAS Circuit	9	MM9	MM9: SRE_NarL-F.L.T.	SRE_NarL-F.L.T.	NarX = EF1a_RBDCRD-6xfL NarL = SRE_NarL-F.L.T	SRE	EF1a_RBDCRD-6xfL		SRE_NarL-F.L.T	Fugene [3 µL/µg]	1.5x	HeLa-F	wildtype	wt	yes	3	0.000123487	0.0153179	1.1713	9485.24		175	0.0053	221	11374	0.346	27414	108	0.0059	181450	118	0.0065	1337
100	HeLa-F_G1_G01_010.fcs	E_GS3_98_1_mScarlet_Plate_005-2	01:07:44	A	4	MAPK Sensor	15	MM15	MM15: pFos_mScarlet	pFos_mScarlet	NarX = pFos_mScarlet NarL = 0	pFos	pFos_mScarlet		0	Fugene [3 µL/µg]	1.5x	HeLa-F	wildtype	wt	yes	1	0.00210782	0.0762025	0	6754.5		0	0		0	0		143	0.0301	473	1876	0.395	17100
101	HeLa-F_G2_G02_011.fcs	E_GS3_98_1_mScarlet_Plate_005-2	01:08:34	A	5	MAPK Sensor	15	MM15	MM15: pFos_mScarlet	pFos_mScarlet	NarX = pFos_mScarlet NarL = 0	pFos	pFos_mScarlet		0	Fugene [3 µL/µg]	1.5x	HeLa-F	wildtype	wt	yes	2	0.00205976	0.0778061	0	6693.01		0	0		0	0		243	0.0305	452	3125	0.392	17074
102	HeLa-F_G3_G03_012.fcs	E_GS3_98_1_mScarlet_Plate_005-2	01:09:23	A	6	MAPK Sensor	15	MM15	MM15: pFos_mScarlet	pFos_mScarlet	NarX = pFos_mScarlet NarL = 0	pFos	pFos_mScarlet		0	Fugene [3 µL/µg]	1.5x	HeLa-F	wildtype	wt	yes	3	0.00208964	0.0826506	0	7337.2		0	0		0	0		312	0.0343	447	3772	0.415	17680
103	HeLa-F_G4_G04_013.fcs	E_GS3_98_1_mScarlet_Plate_005-2	01:10:13	B	1	MAPK Sensor	16	MM16	MM16: PY2_mScarlet	PY2_mScarlet	NarX = PY2_mScarlet NarL = 0	PY2	PY2_mScarlet		0	Fugene [3 µL/µg]	1.5x	HeLa-F	wildtype	wt	yes	1	0.000542206	0.0233846	0	5228.28		0	0		0	0		63	0.0076	373	2706	0.325	16087
104	HeLa-F_G5_G05_014.fcs	E_GS3_98_1_mScarlet_Plate_005-2	01:11:03	B	2	MAPK Sensor	16	MM16	MM16: PY2_mScarlet	PY2_mScarlet	NarX = PY2_mScarlet NarL = 0	PY2	PY2_mScarlet		0	Fugene [3 µL/µg]	1.5x	HeLa-F	wildtype	wt	yes	2	0.00054838	0.0232628	0	5068.93		0	0		0	0		46	0.0077	361	1988	0.331	15314
105	HeLa-F_G6_G06_015.fcs	E_GS3_98_1_mScarlet_Plate_005-2	01:11:52	B	3	MAPK Sensor	16	MM16	MM16: PY2_mScarlet	PY2_mScarlet	NarX = PY2_mScarlet NarL = 0	PY2	PY2_mScarlet		0	Fugene [3 µL/µg]	1.5x	HeLa-F	wildtype	wt	yes	3	0.000630185	0.0259366	0	5726.89		0	0		0	0		63	0.009	401	2428	0.347	16504
106	HeLa-F_G7_G07_016.fcs	E_GS3_98_1_mScarlet_Plate_005-2	01:12:42	B	4	MAPK Sensor	17	MM17	MM17: SRE_mScarlet	SRE_mScarlet	NarX = SRE_mScarlet NarL = 0	SRE	SRE_mScarlet		0	Fugene [3 µL/µg]	1.5x	HeLa-F	wildtype	wt	yes	1	0.000191897	0.0132678	0	7428.97		0	0		0	0		32	0.0054	264	2409	0.407	18253
107	HeLa-F_G8_G08_017.fcs	E_GS3_98_1_mScarlet_Plate_005-2	01:13:32	B	5	MAPK Sensor	17	MM17	MM17: SRE_mScarlet	SRE_mScarlet	NarX = SRE_mScarlet NarL = 0	SRE	SRE_mScarlet		0	Fugene [3 µL/µg]	1.5x	HeLa-F	wildtype	wt	yes	2	0.000173417	0.0122195	0	7572.48		0	0		0	0		54	0.0049	268	4428	0.401	18884
108	HeLa-F_G9_G09_018.fcs	E_GS3_98_1_mScarlet_Plate_005-2	01:14:21	B	6	MAPK Sensor	17	MM17	MM17: SRE_mScarlet	SRE_mScarlet	NarX = SRE_mScarlet NarL = 0	SRE	SRE_mScarlet		0	Fugene [3 µL/µg]	1.5x	HeLa-F	wildtype	wt	yes	3	0.00021281	0.0156716	0	7845.03		0	0		0	0		62	0.0063	265	3964	0.402	19515
109	HT-29_E1_E01_049.fcs	E_GS3_98_1_mCerulean_Plate_003	19:13:38	A	1	RAS Circuit	6	MM6	MM6: RAS Sensor_F.L.T.	RAS Sensor_F.L.T.	NarX = EF1a_RBDCRD-6xfL NarL = EF1a_Narl-F.L.T.	EF1a	EF1a_RBDCRD-6xfL		EF1a_Narl-F.L.T.	Lipofectamine 3000 [2 µL/µg]	1.5x	HT-29	wildtype	wt	yes	1	0.000667955	0.0137255	0.06636	99.348	121523	17	0.00014	474	1245	0.0102	9740	2	1.65E−3%	192112	21	0.00017	1065
110	HT-29_E2_E02_050.fcs	E_GS3_98_1_mCerulean_Plate_003	19:14:58	A	2	RAS Circuit	6	MM6	MM6: RAS Sensor_F.L.T.	RAS Sensor_F.L.T.	NarX = EF1a_RBDCRD-6xfL NarL = EF1a_Narl-F.L.T.	EF1a	EF1a_RBDCRD-6xfL		EF1a_Narl-F.L.T.	Lipofectamine 3000 [2 µL/µg]	1.5x	HT-29	wildtype	wt	yes	2	0.000329122	0.00983673	0.0300768	91.385	124005	12	9.64e-05	312	1220	0.0098	9325	1	8.06E−4%	171553	22	0.00018	1066
111	HT-29_E3_E03_051.fcs	E_GS3_98_1_mCerulean_Plate_003	19:16:06	A	3	RAS Circuit	6	MM6	MM6: RAS Sensor_F.L.T.	RAS Sensor_F.L.T.	NarX = EF1a_RBDCRD-6xfL NarL = EF1a_Narl-F.L.T.	EF1a	EF1a_RBDCRD-6xfL		EF1a_Narl-F.L.T.	Lipofectamine 3000 [2 µL/µg]	1.5x	HT-29	wildtype	wt	yes	3	0.000562041	0.02	0.052	92.52	91676	18	0.0002	260	916	0.01	9252	2	2.18E−3%	188648	25	0.00027	1068
112	HT-29_E4_E04_052.fcs	E_GS3_98_1_mCerulean_Plate_003	19:17:14	A	4	RAS Circuit	10	MM10	MM10: PY2_NarL-F.L.T.	PY2_NarL-F.L.T.	NarX = EF1a_RBDCRD-6xfL NarL = PY2_NarL-F.L.T	PY2	EF1a_RBDCRD-6xfL		PY2_NarL-F.L.T	Lipofectamine 3000 [2 µL/µg]	1.5x	HT-29	wildtype	wt	yes	1	0.000147544	0.00647183	0.0181962	123.327	97039	9	9.19e-05	198	1386	0.0142	8685	5	5.15E−3%	193643	41	0.00042	1076
113	HT-29_E5_E05_053.fcs	E_GS3_98_1_mCerulean_Plate_003	19:18:22	A	5	RAS Circuit	10	MM10	MM10: PY2_NarL-F.L.T.	PY2_NarL-F.L.T.	NarX = EF1a_RBDCRD-6xfL NarL = PY2_NarL-F.L.T	PY2	EF1a_RBDCRD-6xfL		PY2_NarL-F.L.T	Lipofectamine 3000 [2 µL/µg]	1.5x	HT-29	wildtype	wt	yes	2	0.000572446	0.0138211	0.06256	109.285	108115	18	0.00017	368	1333	0.0123	8885	4	3.70E−3%	130802	33	0.00031	1055
114	HT-29_E6_E06_054.fcs	E_GS3_98_1_mCerulean_Plate_003	19:19:30	A	6	RAS Circuit	10	MM10	MM10: PY2_NarL-F.L.T.	PY2_NarL-F.L.T.	NarX = EF1a_RBDCRD-6xfL NarL = PY2_NarL-F.L.T	PY2	EF1a_RBDCRD-6xfL		PY2_NarL-F.L.T	Lipofectamine 3000 [2 µL/µg]	1.5x	HT-29	wildtype	wt	yes	3	0.000729745	0.0135593	0.07712	105.681	110509	18	0.00016	482	1305	0.0118	8956	2	1.81E−3%	282	35	0.00032	1045
115	HT-29_F4_F04_058.fcs	E_GS3_98_1_mCerulean_Plate_003	19:24:03	B	4	RAS Circuit	11	MM11	MM11: PY2_all_F.L.T.	PY2_all_F.L.T.	NarX = PY2_RBDCRD-6xfL NarL = PY2_NarL-F.L.T	PY2	PY2_RBDCRD-6xfL		PY2_NarL-F.L.T	Lipofectamine 3000 [2 µL/µg]	1.5x	HT-29	wildtype	wt	yes	1	0.00493908	0.0482353	0.39606	80.189	104634	43	0.00041	966	892	0.0085	9434	2	1.91E−3%	162595	41	0.00039	1058
116	HT-29_F5_F05_059.fcs	E_GS3_98_1_mCerulean_Plate_003	19:25:12	B	5	RAS Circuit	11	MM11	MM11: PY2_all_F.L.T.	PY2_all_F.L.T.	NarX = PY2_RBDCRD-6xfL NarL = PY2_NarL-F.L.T	PY2	PY2_RBDCRD-6xfL		PY2_NarL-F.L.T	Lipofectamine 3000 [2 µL/µg]	1.5x	HT-29	wildtype	wt	yes	2	0.00518702	0.04	0.37692	72.666	94136	34	0.00036	1047	843	0.009	8074	1	1.06E−3%	150133	29	0.00031	1035
117	HT-29_F6_F06_060.fcs	E_GS3_98_1_mCerulean_Plate_003	19:26:20	B	6	RAS Circuit	11	MM11	MM11: PY2_all_F.L.T.	PY2_all_F.L.T.	NarX = PY2_RBDCRD-6xfL NarL = PY2_NarL-F.L.T	PY2	PY2_RBDCRD-6xfL		PY2_NarL-F.L.T	Lipofectamine 3000 [2 µL/µg]	1.5x	HT-29	wildtype	wt	yes	3	0.00356622	0.05	0.22058	61.8526	114790	47	0.00041	538	926	0.0082	7543	0	0		40	0.00035	1046
118	HT-29_G1_G01_061.fcs	E_GS3_98_1_mCerulean_Plate_003	19:27:28	C	1	RAS Circuit	8	MM8	MM8: pFos_NarL-F.L.T.	pFos_NarL-F.L.T.	NarX = EF1a_RBDCRD-6xfL NarL = pFos_NarL-F.L.T	pFos	EF1a_RBDCRD-6xfL		pFos_NarL-F.L.T	Lipofectamine 3000 [2 µL/µg]	1.5x	HT-29	wildtype	wt	yes	1	0.000233429	0.0107204	0.0215352	92.256	101436	10	9.97e-05	216	935	0.0093	9920	3	2.96E−3%	156784	31	0.00031	1082
119	HT-29_G2_G02_062.fcs	E_GS3_98_1_mCerulean_Plate_003	19:28:36	C	2	RAS Circuit	8	MM8	MM8: pFos_NarL-F.L.T.	pFos_NarL-F.L.T.	NarX = EF1a_RBDCRD-6xfL NarL = pFos_NarL-F.L.T	pFos	EF1a_RBDCRD-6xfL		pFos_NarL-F.L.T	Lipofectamine 3000 [2 µL/µg]	1.5x	HT-29	wildtype	wt	yes	2	0.000350503	0.00968687	0.0269479	76.8834	114106	11	9.59e-05	281	1130	0.0099	7766	0	0		36	0.00032	1039
120	HT-29_G3_G03_063.fcs	E_GS3_98_1_mCerulean_Plate_003	19:29:45	C	3	RAS Circuit	8	MM8	MM8: pFos_NarL-F.L.T.	pFos_NarL-F.L.T.	NarX = EF1a_RBDCRD-6xfL NarL = pFos_NarL-F.L.T	pFos	EF1a_RBDCRD-6xfL		pFos_NarL-F.L.T	Lipofectamine 3000 [2 µL/µg]	1.5x	HT-29	wildtype	wt	yes	3	0.000202424	0.00728421	0.0182688	90.25	101848	7	6.92e-05	264	960	0.0095	9500	2	1.96E−3%	176760	40	0.00039	1044
121	HT-29_G4_G04_064.fcs	E_GS3_98_1_mCerulean_Plate_003	19:30:53	C	4	Control	12	MM12	MM12: RBDr89lCRDc168S_Sensor	RBDr89lCRDc168S_Sensor	NarX = EF1a_RBDr89lCRDc168s NarL = EF1a_Narl-F.L.T.	EF1a	EF1a_RBDr89lCRDc168s		EF1a_Narl-F.L.T.	Lipofectamine 3000 [2 µL/µg]	1.5x	HT-29	wildtype	wt	yes	1	5.52336e-05	0.00571429	0.0060544	109.614	108859	7	6.4e-05	94.6	1223	0.0112	9787	1	9.19E−4%	181707	35	0.00032	1051
122	HT-29_G5_G05_065.fcs	E_GS3_98_1_mCerulean_Plate_003	19:32:01	C	5	Control	12	MM12	MM12: RBDr89lCRDc168S_Sensor	RBDr89lCRDc168S_Sensor	NarX = EF1a_RBDr89lCRDc168s NarL = EF1a_Narl-F.L.T.	EF1a	EF1a_RBDr89lCRDc168s		EF1a_Narl-F.L.T.	Lipofectamine 3000 [2 µL/µg]	1.5x	HT-29	wildtype	wt	yes	2	0.000117451	0.0103774	0.010362	88.2238	113460	12	0.00011	94.2	1192	0.0106	8323	3	2.64E−3%	187708	36	0.00032	1054
123	HT-29_G6_G06_066.fcs	E_GS3_98_1_mCerulean_Plate_003	19:33:09	C	6	Control	12	MM12	MM12: RBDr89lCRDc168S_Sensor	RBDr89lCRDc168S_Sensor	NarX = EF1a_RBDr89lCRDc168s NarL = EF1a_Narl-F.L.T.	EF1a	EF1a_RBDr89lCRDc168s		EF1a_Narl-F.L.T.	Lipofectamine 3000 [2 µL/µg]	1.5x	HT-29	wildtype	wt	yes	3	0.000242822	0.0104762	0.02299	94.6785	122659	13	0.00011	209	1279	0.0105	9017	4	3.26E−3%	186619	39	0.00032	1066
124	HT-29_H1_H01_067.fcs	E_GS3_98_1_mCerulean_Plate_003	19:34:18	D	1	RAS Circuit	9	MM9	MM9: SRE_NarL-F.L.T.	SRE_NarL-F.L.T.	NarX = EF1a_RBDCRD-6xfL NarL = SRE_NarL-F.L.T	SRE	EF1a_RBDCRD-6xfL		SRE_NarL-F.L.T	Lipofectamine 3000 [2 µL/µg]	1.5x	HT-29	wildtype	wt	yes	1	0.000287967	0.0074	0.0282458	98.087	98501	8	8.14e-05	347	1084	0.011	8917	0	0		17	0.00017	1033
125	HT-29_H2_H02_068.fcs	E_GS3_98_1_mCerulean_Plate_003	19:35:26	D	2	RAS Circuit	9	MM9	MM9: SRE_NarL-F.L.T.	SRE_NarL-F.L.T.	NarX = EF1a_RBDCRD-6xfL NarL = SRE_NarL-F.L.T	SRE	EF1a_RBDCRD-6xfL		SRE_NarL-F.L.T	Lipofectamine 3000 [2 µL/µg]	1.5x	HT-29	wildtype	wt	yes	2	0.000267779	0.0112069	0.02535	94.6676	106247	14	0.00013	195	1248	0.0116	8161	4	3.76E−3%	163997	18	0.00017	1101
126	HT-29_H3_H03_069.fcs	E_GS3_98_1_mCerulean_Plate_003	19:36:34	D	3	RAS Circuit	9	MM9	MM9: SRE_NarL-F.L.T.	SRE_NarL-F.L.T.	NarX = EF1a_RBDCRD-6xfL NarL = SRE_NarL-F.L.T	SRE	EF1a_RBDCRD-6xfL		SRE_NarL-F.L.T	Lipofectamine 3000 [2 µL/µg]	1.5x	HT-29	wildtype	wt	yes	3	0.000319306	0.017	0.03111	97.43	107169	18	0.00017	183	1061	0.01	9743	4	3.73E−3%	167928	28	0.00026	1049
127	HT-29_C1_C01_019.fcs	E_GS3_98_1_mScarlet_Plate_006	04:00:48	A	4	MAPK Sensor	15	MM15	MM15: pFos_mScarlet	pFos_mScarlet	NarX = pFos_mScarlet NarL = 0	pFos	pFos_mScarlet		0	Lipofectamine 3000 [2 µL/µg]	1.5x	HT-29	wildtype	wt	yes	1	0.00130077	0.0294118	0	66.4224	124758	0	0		0	0		19	0.00015	576	631	0.0051	13024
128	HT-29_C2_C02_020.fcs	E_GS3_98_1_mScarlet_Plate_006	04:01:56	A	5	MAPK Sensor	15	MM15	MM15: pFos_mScarlet	pFos_mScarlet	NarX = pFos_mScarlet NarL = 0	pFos	pFos_mScarlet		0	Lipofectamine 3000 [2 µL/µg]	1.5x	HT-29	wildtype	wt	yes	2	0.00107641	0.0269231	0	65.0312	117500	0	0		0	0		16	0.00014	500	613	0.0052	12506
129	HT-29_C3_C03_021.fcs	E_GS3_98_1_mScarlet_Plate_006	04:03:04	A	6	MAPK Sensor	15	MM15	MM15: pFos_mScarlet	pFos_mScarlet	NarX = pFos_mScarlet NarL = 0	pFos	pFos_mScarlet		0	Lipofectamine 3000 [2 µL/µg]	1.5x	HT-29	wildtype	wt	yes	3	0.0016872	0.0285714	0	60.5976	128399	0	0		0	0		16	0.00012	852	536	0.0042	14428
130	HT-29_C4_C04_022.fcs	E_GS3_98_1_mScarlet_Plate_006	04:04:12	B	1	MAPK Sensor	16	MM16	MM16: PY2_mScarlet	PY2_mScarlet	NarX = PY2_mScarlet NarL = 0	PY2	PY2_mScarlet		0	Lipofectamine 3000 [2 µL/µg]	1.5x	HT-29	wildtype	wt	yes	1	0.000895062	0.0254545	0	86.966	126159	0	0		0	0		18	0.00014	556	696	0.0055	15812
131	HT-29_C5_C05_023.fcs	E_GS3_98_1_mScarlet_Plate_006	04:05:20	B	2	MAPK Sensor	16	MM16	MM16: PY2_mScarlet	PY2_mScarlet	NarX = PY2_mScarlet NarL = 0	PY2	PY2_mScarlet		0	Lipofectamine 3000 [2 µL/µg]	1.5x	HT-29	wildtype	wt	yes	2	0.000797935	0.024	0	65.87	129527	0	0		0	0		15	0.00012	438	654	0.005	13174
132	HT-29_C6_C06_024.fcs	E_GS3_98_1_mScarlet_Plate_006	04:06:28	B	3	MAPK Sensor	16	MM16	MM16: PY2_mScarlet	PY2_mScarlet	NarX = PY2_mScarlet NarL = 0	PY2	PY2_mScarlet		0	Lipofectamine 3000 [2 µL/µg]	1.5x	HT-29	wildtype	wt	yes	3	0.00197446	0.019	0	71.45	136878	0	0		0	0		13	9.5e-05	1485	680	0.005	14290
133	HT-29_C7_C07_025.fcs	E_GS3_98_1_mScarlet_Plate_006	04:07:36	B	4	MAPK Sensor	17	MM17	MM17: SRE_mScarlet	SRE_mScarlet	NarX = SRE_mScarlet NarL = 0	SRE	SRE_mScarlet		0	Lipofectamine 3000 [2 µL/µg]	1.5x	HT-29	wildtype	wt	yes	1	0.00179505	0.0376812	0	121.523	119949	0	0		0	0		31	0.00026	839	833	0.0069	17612
134	HT-29_C8_C08_026.fcs	E_GS3_98_1_mScarlet_Plate_006	04:08:44	B	5	MAPK Sensor	17	MM17	MM17: SRE_mScarlet	SRE_mScarlet	NarX = SRE_mScarlet NarL = 0	SRE	SRE_mScarlet		0	Lipofectamine 3000 [2 µL/µg]	1.5x	HT-29	wildtype	wt	yes	2	0.00145046	0.0269231	0	105.401	118027	0	0		0	0		25	0.00021	728	923	0.0078	13513
135	HT-29_C9_C09_027.fcs	E_GS3_98_1_mScarlet_Plate_006	04:09:52	B	6	MAPK Sensor	17	MM17	MM17: SRE_mScarlet	SRE_mScarlet	NarX = SRE_mScarlet NarL = 0	SRE	SRE_mScarlet		0	Lipofectamine 3000 [2 µL/µg]	1.5x	HT-29	wildtype	wt	yes	3	0.00200356	0.0314286	0	109.585	121009	0	0		0	0		27	0.00022	998	849	0.007	15655
136	Igrov-1_A7_A07_025.fcs	E_GS3_98_1_mCerulean_Plate_003	22:45:45	A	1	RAS Circuit	6	MM6	MM6: RAS Sensor_F.L.T.	RAS Sensor_F.L.T.	NarX = EF1a_RBDCRD-6xfL NarL = EF1a_Narl-F.L.T.	EF1a	EF1a_RBDCRD-6xfL		EF1a_Narl-F.L.T.	Fugene [3 µL/µg]	1.5x	Igrov-1	wildtype	wt	yes	1	0.0017961	0.04811	13.272	7389.36	13248	307	0.014	948	6354	0.291	25393	126	0.0095	185841	137	0.0103	1349
137	Igrov-1_A8_A08_026.fcs	E_GS3_98_1_mCerulean_Plate_003	22:46:53	A	2	RAS Circuit	6	MM6	MM6: RAS Sensor_F.L.T.	RAS Sensor_F.L.T.	NarX = EF1a_RBDCRD-6xfL NarL = EF1a_Narl-F.L.T.	EF1a	EF1a_RBDCRD-6xfL		EF1a_Narl-F.L.T.	Fugene [3 µL/µg]	1.5x	Igrov-1	wildtype	wt	yes	2	0.00221064	0.0465278	15.9058	7195.1	17996	419	0.0134	1187	9009	0.288	24983	152	0.0084	191091	169	0.0094	1408
138	Igrov-1_A9_A09_027.fcs	E_GS3_98_1_mCerulean_Plate_003	22:48:02	A	3	RAS Circuit	6	MM6	MM6: RAS Sensor_F.L.T.	RAS Sensor_F.L.T.	NarX = EF1a_RBDCRD-6xfL NarL = EF1a_Narl-F.L.T.	EF1a	EF1a_RBDCRD-6xfL		EF1a_Narl-F.L.T.	Fugene [3 µL/µg]	1.5x	Igrov-1	wildtype	wt	yes	3	0.00235734	0.048951	16.59	7037.6	19957	470	0.014	1185	9620	0.286	24607	162	0.0081	188584	173	0.0087	1402
139	Igrov-1_A10_A10_028.fcs	E_GS3_98_1_mCerulean_Plate_003	22:49:11	A	4	RAS Circuit	10	MM10	MM10: PY2_NarL-F.L.T.	PY2_NarL-F.L.T.	NarX = EF1a_RBDCRD-6xfL NarL = PY2_NarL-F.L.T	PY2	EF1a_RBDCRD-6xfL		PY2_NarL-F.L.T	Fugene [3 µL/µg]	1.5x	Igrov-1	wildtype	wt	yes	1	0.00146756	0.0305842	11.0271	7513.91	19986	294	0.0089	1239	9651	0.291	25821	186	0.0093	189227	201	0.0101	1504
140	Igrov-1_A11_A11_029.fcs	E_GS3_98_1_mCerulean_Plate_003	22:50:20	A	5	RAS Circuit	10	MM10	MM10: PY2_NarL-F.L.T.	PY2_NarL-F.L.T.	NarX = EF1a_RBDCRD-6xfL NarL = PY2_NarL-F.L.T	PY2	EF1a_RBDCRD-6xfL		PY2_NarL-F.L.T	Fugene [3 µL/µg]	1.5x	Igrov-1	wildtype	wt	yes	2	0.00132953	0.0309764	10.3776	7805.46	17592	285	0.0092	1128	9143	0.297	26281	171	0.0097	189880	185	0.0105	1349
141	Igrov-1_A12_A12_030.fcs	E_GS3_98_1_mCerulean_Plate_003	22:51:29	A	6	RAS Circuit	10	MM10	MM10: PY2_NarL-F.L.T.	PY2_NarL-F.L.T.	NarX = EF1a_RBDCRD-6xfL NarL = PY2_NarL-F.L.T	PY2	EF1a_RBDCRD-6xfL		PY2_NarL-F.L.T	Fugene [3 µL/µg]	1.5x	Igrov-1	wildtype	wt	yes	3	0.00162528	0.0346939	11.985	7374.11	20509	343	0.0102	1175	9856	0.294	25082	176	0.0086	188742	194	0.0095	1378
142	Igrov-1_B10_B10_034.fcs	E_GS3_98_1_mCerulean_Plate_003	22:56:03	B	4	RAS Circuit	11	MM11	MM11: PY2_all_F.L.T.	PY2_all_F.L.T.	NarX = PY2_RBDCRD-6xfL NarL = PY2_NarL-F.L.T	PY2	PY2_RBDCRD-6xfL		PY2_NarL-F.L.T	Fugene [3 µL/µg]	1.5x	Igrov-1	wildtype	wt	yes	1	0.00137908	0.0405858	7.3623	5338.54	19310	288	0.0097	759	7067	0.239	22337	100	0.0052	188951	115	0.006	1346
143	Igrov-1_B11_B11_035.fcs	E_GS3_98_1_mCerulean_Plate_003	22:57:12	B	5	RAS Circuit	11	MM11	MM11: PY2_all_F.L.T.	PY2_all_F.L.T.	NarX = PY2_RBDCRD-6xfL NarL = PY2_NarL-F.L.T	PY2	PY2_RBDCRD-6xfL		PY2_NarL-F.L.T	Fugene [3 µL/µg]	1.5x	Igrov-1	wildtype	wt	yes	2	0.00127849	0.0431298	8.2264	6434.46	17449	318	0.0113	728	7386	0.262	24559	108	0.0062	190519	116	0.0066	1353
144	Igrov-1_B12_B12_036.fcs	E_GS3_98_1_mCerulean_Plate_003	22:58:21	B	6	RAS Circuit	11	MM11	MM11: PY2_all_F.L.T.	PY2_all_F.L.T.	NarX = PY2_RBDCRD-6xfL NarL = PY2_NarL-F.L.T	PY2	PY2_RBDCRD-6xfL		PY2_NarL-F.L.T	Fugene [3 µL/µg]	1.5x	Igrov-1	wildtype	wt	yes	3	0.0014334	0.0400749	8.132	5673.22	20690	345	0.0107	760	8613	0.267	21248	100	0.0048	187254	118	0.0057	1379
145	Igrov-1_C7_C07_037.fcs	E_GS3_98_1_mCerulean_Plate_003	22:59:29	C	1	RAS Circuit	8	MM8	MM8: pFos_NarL-F.L.T.	pFos_NarL-F.L.T.	NarX = EF1a_RBDCRD-6xfL NarL = pFos_NarL-F.L.T	pFos	EF1a_RBDCRD-6xfL		pFos_NarL-F.L.T	Fugene [3 µL/µg]	1.5x	Igrov-1	wildtype	wt	yes	1	0.000339933	0.0169935	2.7612	8122.77	15151	142	0.0052	531	8280	0.306	26545	144	0.0095	189838	156	0.0103	1339
146	Igrov-1_C8_C08_038.fcs	E_GS3_98_1_mCerulean_Plate_003	23:00:37	C	2	RAS Circuit	8	MM8	MM8: pFos_NarL-F.L.T.	pFos_NarL-F.L.T.	NarX = EF1a_RBDCRD-6xfL NarL = pFos_NarL-F.L.T	pFos	EF1a_RBDCRD-6xfL		pFos_NarL-F.L.T	Fugene [3 µL/µg]	1.5x	Igrov-1	wildtype	wt	yes	2	0.000557608	0.0199313	4.2862	7686.76	18131	183	0.0058	739	9146	0.291	26415	157	0.0087	186844	176	0.0097	1287
147	Igrov-1_C9_C09_039.fcs	E_GS3_98_1_mCerulean_Plate_003	23:01:46	C	3	RAS Circuit	8	MM8	MM8: pFos_NarL-F.L.T.	pFos_NarL-F.L.T.	NarX = EF1a_RBDCRD-6xfL NarL = pFos_NarL-F.L.T	pFos	EF1a_RBDCRD-6xfL		pFos_NarL-F.L.T	Fugene [3 µL/µg]	1.5x	Igrov-1	wildtype	wt	yes	3	0.000573755	0.0211538	4.7916	8351.3	16138	185	0.0066	726	8755	0.312	26767	159	0.0099	192729	169	0.0105	1308
148	Igrov-1_C10_C10_040.fcs	E_GS3_98_1_mCerulean_Plate_003	23:02:55	C	4	Control	12	MM12	MM12: RBDr89lCRDc168S_Sensor	RBDr89lCRDc168S_Sensor	NarX = EF1a_RBDr89lCRDc168s NarL = EF1a_Narl-F.L.T.	EF1a	EF1a_RBDr89lCRDc168s		EF1a_Narl-F.L.T.	Fugene [3 µL/µg]	1.5x	Igrov-1	wildtype	wt	yes	1	3.63153e-05	0.00708333	0.2346	6460.08	19046	49	0.0017	138	6929	0.24	26917	135	0.0071	189994	149	0.0078	1294
149	Igrov-1_C11_C11_041.fcs	E_GS3_98_1_mCerulean_Plate_003	23:04:04	C	5	Control	12	MM12	MM12: RBDr89lCRDc168S_Sensor	RBDr89lCRDc168S_Sensor	NarX = EF1a_RBDr89lCRDc168s NarL = EF1a_Narl-F.L.T.	EF1a	EF1a_RBDr89lCRDc168s		EF1a_Narl-F.L.T.	Fugene [3 µL/µg]	1.5x	Igrov-1	wildtype	wt	yes	2	3.0626e-05	0.00842912	0.2222	7255.28	18149	59	0.0022	101	7067	0.261	27798	163	0.009	188861	176	0.0097	1296
150	Igrov-1_C12_C12_042.fcs	E_GS3_98_1_mCerulean_Plate_003	23:05:13	C	6	Control	12	MM12	MM12: RBDr89lCRDc168S_Sensor	RBDr89lCRDc168S_Sensor	NarX = EF1a_RBDr89lCRDc168s NarL = EF1a_Narl-F.L.T.	EF1a	EF1a_RBDr89lCRDc168s		EF1a_Narl-F.L.T.	Fugene [3 µL/µg]	1.5x	Igrov-1	wildtype	wt	yes	3	2.59521e-05	0.00584192	0.2125	8188.16	19237	54	0.0017	125	9290	0.291	28138	192	0.01	191521	206	0.0107	1318
151	Igrov-1_D7_D07_043.fcs	E_GS3_98_1_mCerulean_Plate_003	23:06:21	D	1	RAS Circuit	9	MM9	MM9: SRE_NarL-F.L.T.	SRE_NarL-F.L.T.	NarX = EF1a_RBDCRD-6xfL NarL = SRE_NarL-F.L.T	SRE	EF1a_RBDCRD-6xfL		SRE_NarL-F.L.T	Fugene [3 µL/µg]	1.5x	Igrov-1	wildtype	wt	yes	1	0.00189627	0.0356436	14.8176	7814.07	17264	309	0.0108	1372	8644	0.303	25789	151	0.0087	191638	161	0.0093	1408
152	Igrov-1_D8_D08_044.fcs	E_GS3_98_1_mCerulean_Plate_003	23:07:28	D	2	RAS Circuit	9	MM9	MM9: SRE_NarL-F.L.T.	SRE_NarL-F.L.T.	NarX = EF1a_RBDCRD-6xfL NarL = SRE_NarL-F.L.T	SRE	EF1a_RBDCRD-6xfL		SRE_NarL-F.L.T	Fugene [3 µL/µg]	1.5x	Igrov-1	wildtype	wt	yes	2	0.00153102	0.0318182	12.3382	8058.82	18438	302	0.0098	1259	9513	0.308	26165	185	0.01	186595	198	0.0107	1429
153	Igrov-1_D9_D09_045.fcs	E_GS3_98_1_mCerulean_Plate_003	23:08:37	D	3	RAS Circuit	9	MM9	MM9: SRE_NarL-F.L.T.	SRE_NarL-F.L.T.	NarX = EF1a_RBDCRD-6xfL NarL = SRE_NarL-F.L.T	SRE	EF1a_RBDCRD-6xfL		SRE_NarL-F.L.T	Fugene [3 µL/µg]	1.5x	Igrov-1	wildtype	wt	yes	3	0.00155597	0.0326019	13.884	8923.07	16154	292	0.0104	1335	8952	0.319	27972	190	0.0118	189687	202	0.0125	1397
154	Igrov-1_F1_F01_046.fcs	E_GS3_98_1_mScarlet_Plate_006	04:32:18	A	4	MAPK Sensor	15	MM15	MM15: pFos_mScarlet	pFos_mScarlet	NarX = pFos_mScarlet NarL = 0	pFos	pFos_mScarlet		0	Fugene [3 µL/µg]	1.5x	Igrov-1	wildtype	wt	yes	1	0.000617167	0.0219512	0	2712.4	25675	0	0		0	0		93	0.0036	465	4211	0.164	16539
155	Igrov-1_F2_F02_047.fcs	E_GS3_98_1_mScarlet_Plate_006	04:33:27	A	5	MAPK Sensor	15	MM15	MM15: pFos_mScarlet	pFos_mScarlet	NarX = pFos_mScarlet NarL = 0	pFos	pFos_mScarlet		0	Fugene [3 µL/µg]	1.5x	Igrov-1	wildtype	wt	yes	2	0.000651986	0.0187919	0	2276.12	30541	0	0		0	0		84	0.0028	530	4548	0.149	15276
156	Igrov-1_F3_F03_048.fcs	E_GS3_98_1_mScarlet_Plate_006	04:34:35	A	6	MAPK Sensor	15	MM15	MM15: pFos_mScarlet	pFos_mScarlet	NarX = pFos_mScarlet NarL = 0	pFos	pFos_mScarlet		0	Fugene [3 µL/µg]	1.5x	Igrov-1	wildtype	wt	yes	3	0.000728927	0.0216216	0	2326.71	33401	0	0		0	0		106	0.0032	530	4944	0.148	15721
157	Igrov-1_F4_F04_049.fcs	E_GS3_98_1_mScarlet_Plate_006	04:35:43	B	1	MAPK Sensor	16	MM16	MM16: PY2_mScarlet	PY2_mScarlet	NarX = PY2_mScarlet NarL = 0	PY2	PY2_mScarlet		0	Fugene [3 µL/µg]	1.5x	Igrov-1	wildtype	wt	yes	1	0.00334586	0.0533333	0	4682.57	44559	0	0		0	0		608	0.0136	1152	11344	0.255	18363
158	Igrov-1_F5_F05_050.fcs	E_GS3_98_1_mScarlet_Plate_006	04:36:51	B	2	MAPK Sensor	16	MM16	MM16: PY2_mScarlet	PY2_mScarlet	NarX = PY2_mScarlet NarL = 0	PY2	PY2_mScarlet		0	Fugene [3 µL/µg]	1.5x	Igrov-1	wildtype	wt	yes	2	0.00240546	0.0517241	0	4955.61	39438	0	0		0	0		532	0.0135	883	10296	0.261	18987
159	Igrov-1_F6_F06_051.fcs	E_GS3_98_1_mScarlet_Plate_006	04:37:59	B	3	MAPK Sensor	16	MM16	MM16: PY2_mScarlet	PY2_mScarlet	NarX = PY2_mScarlet NarL = 0	PY2	PY2_mScarlet		0	Fugene [3 µL/µg]	1.5x	Igrov-1	wildtype	wt	yes	3	0.00237582	0.0501901	0	5272.62	35731	0	0		0	0		473	0.0132	949	9413	0.263	20048
160	Igrov-1_F7_F07_052.fcs	E_GS3_98_1_mScarlet_Plate_006	04:39:07	B	4	MAPK Sensor	17	MM17	MM17: SRE_mScarlet	SRE_mScarlet	NarX = SRE_mScarlet NarL = 0	SRE	SRE_mScarlet		0	Fugene [3 µL/µg]	1.5x	Igrov-1	wildtype	wt	yes	1	0.000328454	0.0105769	0	3710.72	37191	0	0		0	0		82	0.0022	554	7748	0.208	17840
161	Igrov-1_F8_F08_053.fcs	E_GS3_98_1_mScarlet_Plate_006	04:40:15	B	5	MAPK Sensor	17	MM17	MM17: SRE_mScarlet	SRE_mScarlet	NarX = SRE_mScarlet NarL = 0	SRE	SRE_mScarlet		0	Fugene [3 µL/µg]	1.5x	Igrov-1	wildtype	wt	yes	2	0.000314259	0.0130435	0	3874.83	35655	0	0		0	0		95	0.0027	451	7378	0.207	18719
162	Igrov-1_F9_F09_054.fcs	E_GS3_98_1_mScarlet_Plate_006	04:41:24	B	6	MAPK Sensor	17	MM17	MM17: SRE_mScarlet	SRE_mScarlet	NarX = SRE_mScarlet NarL = 0	SRE	SRE_mScarlet		0	Fugene [3 µL/µg]	1.5x	Igrov-1	wildtype	wt	yes	3	0.000362467	0.0115183	0	3247.19	36911	0	0		0	0		81	0.0022	535	7045	0.191	17001
163	K562_A7_A07_025.fcs	E_GS3_98_1_mCerulean_Plate_002	18:39:13	A	1	RAS Circuit	6	MM6	MM6: RAS Sensor_F.L.T.	RAS Sensor_F.L.T.	NarX = EF1a_RBDCRD-6xfL NarL = EF1a_Narl-F.L.T.	EF1a	EF1a_RBDCRD-6xfL		EF1a_Narl-F.L.T.	Lipofectamine 2000 [3 µL/µg]	1.5x	K562	mutated	BCR-ABL	no	1	0.00479669	0.0385475	13.6965	2855.41	87423	776	0.0069	1985	20034	0.179	15952	4	4.58E−3%	171869	37	0.00042	1073
164	K562_A8_A08_026.fcs	E_GS3_98_1_mCerulean_Plate_002	18:40:22	A	2	RAS Circuit	6	MM6	MM6: RAS Sensor_F.L.T.	RAS Sensor_F.L.T.	NarX = EF1a_RBDCRD-6xfL NarL = EF1a_Narl-F.L.T.	EF1a	EF1a_RBDCRD-6xfL		EF1a_Narl-F.L.T.	Lipofectamine 2000 [3 µL/µg]	1.5x	K562	mutated	BCR-ABL	no	2	0.00470009	0.0392593	9.6725	2057.94	84844	545	0.0053	1825	13906	0.135	15244	1	1.18E−3%	156448	48	0.00057	1037
165	K562_A9_A09_027.fcs	E_GS3_98_1_mCerulean_Plate_002	18:41:30	A	3	RAS Circuit	6	MM6	MM6: RAS Sensor_F.L.T.	RAS Sensor_F.L.T.	NarX = EF1a_RBDCRD-6xfL NarL = EF1a_Narl-F.L.T.	EF1a	EF1a_RBDCRD-6xfL		EF1a_Narl-F.L.T.	Lipofectamine 2000 [3 µL/µg]	1.5x	K562	mutated	BCR-ABL	no	3	0.00530601	0.0389313	10.5417	1986.75	84822	517	0.0051	2067	13373	0.131	15166	5	5.89E−3%	164155	33	0.00039	1081
166	K562_A10_A10_028.fcs	E_GS3_98_1_mCerulean_Plate_002	18:42:39	A	4	RAS Circuit	10	MM10	MM10: PY2_NarL-F.L.T.	PY2_NarL-F.L.T.	NarX = EF1a_RBDCRD-6xfL NarL = PY2_NarL-F.L.T	PY2	EF1a_RBDCRD-6xfL		PY2_NarL-F.L.T	Lipofectamine 2000 [3 µL/µg]	1.5x	K562	mutated	BCR-ABL	no	1	0.00516062	0.0394737	5.4252	1051.27	99693	370	0.0033	1644	9259	0.0836	12575	3	3.01E−3%	168895	40	0.0004	1058
167	K562_A11_A11_029.fcs	E_GS3_98_1_mCerulean_Plate_002	18:43:48	A	5	RAS Circuit	10	MM10	MM10: PY2_NarL-F.L.T.	PY2_NarL-F.L.T.	NarX = EF1a_RBDCRD-6xfL NarL = PY2_NarL-F.L.T	PY2	EF1a_RBDCRD-6xfL		PY2_NarL-F.L.T	Lipofectamine 2000 [3 µL/µg]	1.5x	K562	mutated	BCR-ABL	no	2	0.00498655	0.0362319	5.088	1020.34	98013	327	0.003	1696	9019	0.0828	12323	1	1.02E−3%	178880	42	0.00043	1054
168	K562_A12_A12_030.fcs	E_GS3_98_1_mCerulean_Plate_002	18:44:57	A	6	RAS Circuit	10	MM10	MM10: PY2_NarL-F.L.T.	PY2_NarL-F.L.T.	NarX = EF1a_RBDCRD-6xfL NarL = PY2_NarL-F.L.T	PY2	EF1a_RBDCRD-6xfL		PY2_NarL-F.L.T	Lipofectamine 2000 [3 µL/µg]	1.5x	K562	mutated	BCR-ABL	no	3	0.00507184	0.0363409	5.0025	986.328	109034	346	0.0029	1725	9623	0.0798	12360	0	0		51	0.00047	1030
169	K562_B10_B10_034.fcs	E_GS3_98_1_mCerulean_Plate_002	18:49:30	B	4	RAS Circuit	11	MM11	MM11: PY2_all_F.L.T.	PY2_all_F.L.T.	NarX = PY2_RBDCRD-6xfL NarL = PY2_NarL-F.L.T	PY2	PY2_RBDCRD-6xfL		PY2_NarL-F.L.T	Lipofectamine 2000 [3 µL/µg]	1.5x	K562	mutated	BCR-ABL	no	1	0.00683526	0.0815273	7.7341	1131.5	87088	797	0.0079	979	9802	0.0969	11677	0	0		42	0.00048	1040
170	K562_B11_B11_035.fcs	E_GS3_98_1_mCerulean_Plate_002	18:50:39	B	5	RAS Circuit	11	MM11	MM11: PY2_all_F.L.T.	PY2_all_F.L.T.	NarX = PY2_RBDCRD-6xfL NarL = PY2_NarL-F.L.T	PY2	PY2_RBDCRD-6xfL		PY2_NarL-F.L.T	Lipofectamine 2000 [3 µL/µg]	1.5x	K562	mutated	BCR-ABL	no	2	0.00838786	0.083871	7.1565	853.197	95080	679	0.0065	1101	8132	0.0775	11009	0	0		55	0.00058	1033
171	K562_B12_B12_036.fcs	E_GS3_98_1_mCerulean_Plate_002	18:51:49	B	6	RAS Circuit	11	MM11	MM11: PY2_all_F.L.T.	PY2_all_F.L.T.	NarX = PY2_RBDCRD-6xfL NarL = PY2_NarL-F.L.T	PY2	PY2_RBDCRD-6xfL		PY2_NarL-F.L.T	Lipofectamine 2000 [3 µL/µg]	1.5x	K562	mutated	BCR-ABL	no	3	0.00735427	0.0846047	5.8682	797.931	105026	699	0.0061	962	8292	0.0721	11067	1	9.52E−4%	157160	58	0.00055	1047
172	K562_C7_C07_037.fcs	E_GS3_98_1_mCerulean_Plate_002	18:52:57	C	1	RAS Circuit	8	MM8	MM8: pFos_NarL-F.L.T.	pFos_NarL-F.L.T.	NarX = EF1a_RBDCRD-6xfL NarL = pFos_NarL-F.L.T	pFos	EF1a_RBDCRD-6xfL		pFos_NarL-F.L.T	Lipofectamine 2000 [3 µL/µg]	1.5x	K562	mutated	BCR-ABL	no	1	0.00400916	0.0344828	9.684	2415.47	86995	663	0.006	1614	19280	0.174	13882	6	6.90E−3%	164398	54	0.00062	1049
173	K562_C8_C08_038.fcs	E_GS3_98_1_mCerulean_Plate_002	18:54:06	C	2	RAS Circuit	8	MM8	MM8: pFos_NarL-F.L.T.	pFos_NarL-F.L.T.	NarX = EF1a_RBDCRD-6xfL NarL = pFos_NarL-F.L.T	pFos	EF1a_RBDCRD-6xfL		pFos_NarL-F.L.T	Lipofectamine 2000 [3 µL/µg]	1.5x	K562	mutated	BCR-ABL	no	2	0.00367815	0.0337423	8.327	2263.91	81577	558	0.0055	1514	16571	0.163	13889	5	6.13E−3%	165751	40	0.00049	1074
174	K562_C9_C09_039.fcs	E_GS3_98_1_mCerulean_Plate_002	18:55:14	C	3	RAS Circuit	8	MM8	MM8: pFos_NarL-F.L.T.	pFos_NarL-F.L.T.	NarX = EF1a_RBDCRD-6xfL NarL = pFos_NarL-F.L.T	pFos	EF1a_RBDCRD-6xfL		pFos_NarL-F.L.T	Lipofectamine 2000 [3 µL/µg]	1.5x	K562	mutated	BCR-ABL	no	3	0.00354504	0.0338235	10.3293	2913.73	76104	701	0.0069	1497	20638	0.204	14283	4	5.26E−3%	131194	40	0.00053	1052
175	K562_C10_C10_040.fcs	E_GS3_98_1_mCerulean_Plate_002	18:56:23	C	4	Control	12	MM12	MM12: RBDr89lCRDc168S_Sensor	RBDr89lCRDc168S_Sensor	NarX = EF1a_RBDr89lCRDc168s NarL = EF1a_Narl-F.L.T.	EF1a	EF1a_RBDr89lCRDc168s		EF1a_Narl-F.L.T.	Lipofectamine 2000 [3 µL/µg]	1.5x	K562	mutated	BCR-ABL	no	1	8.87711e-05	0.00774125	0.12483	1406.2	93012	78	0.00073	171	10016	0.0943	14912	1	1.08E−3%	325	63	0.00068	1033
176	K562_C11_C11_041.fcs	E_GS3_98_1_mCerulean_Plate_002	18:57:32	C	5	Control	12	MM12	MM12: RBDr89lCRDc168S_Sensor	RBDr89lCRDc168S_Sensor	NarX = EF1a_RBDr89lCRDc168s NarL = EF1a_Narl-F.L.T.	EF1a	EF1a_RBDr89lCRDc168s		EF1a_Narl-F.L.T.	Lipofectamine 2000 [3 µL/µg]	1.5x	K562	mutated	BCR-ABL	no	2	0.000118691	0.00876543	0.14271	1202.36	95170	75	0.00071	201	8528	0.081	14844	1	1.05E−3%	153283	40	0.00042	1048
177	K562_C12_C12_042.fcs	E_GS3_98_1_mCerulean_Plate_002	18:58:41	C	6	Control	12	MM12	MM12: RBDr89lCRDc168S_Sensor	RBDr89lCRDc168S_Sensor	NarX = EF1a_RBDr89lCRDc168s NarL = EF1a_Narl-F.L.T.	EF1a	EF1a_RBDr89lCRDc168s		EF1a_Narl-F.L.T.	Lipofectamine 2000 [3 µL/µg]	1.5x	K562	mutated	BCR-ABL	no	3	5.2398e-05	0.00592593	0.06096	1163.4	103174	55	0.00048	127	9256	0.081	14363	2	1.94E−3%	159588	38	0.00037	1046
178	K562_D7_D07_043.fcs	E_GS3_98_1_mCerulean_Plate_002	18:59:49	D	1	RAS Circuit	9	MM9	MM9: SRE_NarL-F.L.T.	SRE_NarL-F.L.T.	NarX = EF1a_RBDCRD-6xfL NarL = SRE_NarL-F.L.T	SRE	EF1a_RBDCRD-6xfL		SRE_NarL-F.L.T	Lipofectamine 2000 [3 µL/µg]	1.5x	K562	mutated	BCR-ABL	no	1	0.00544542	0.0379518	10.3257	1896.22	89990	751	0.0063	1639	19926	0.166	11423	2	2.22E−3%	340	50	0.00056	1039
179	K562_D8_D08_044.fcs	E_GS3_98_1_mCerulean_Plate_002	19:00:58	D	2	RAS Circuit	9	MM9	MM9: SRE_NarL-F.L.T.	SRE_NarL-F.L.T.	NarX = EF1a_RBDCRD-6xfL NarL = SRE_NarL-F.L.T	SRE	EF1a_RBDCRD-6xfL		SRE_NarL-F.L.T	Lipofectamine 2000 [3 µL/µg]	1.5x	K562	mutated	BCR-ABL	no	2	0.00541936	0.0390411	8.55	1577.68	91387	640	0.0057	1500	16351	0.146	10806	2	2.19E−3%	153921	33	0.00036	1045
180	K562_D9_D09_045.fcs	E_GS3_98_1_mCerulean_Plate_002	19:02:07	D	3	RAS Circuit	9	MM9	MM9: SRE_NarL-F.L.T.	SRE_NarL-F.L.T.	NarX = EF1a_RBDCRD-6xfL NarL = SRE_NarL-F.L.T	SRE	EF1a_RBDCRD-6xfL		SRE_NarL-F.L.T	Lipofectamine 2000 [3 µL/µg]	1.5x	K562	mutated	BCR-ABL	no	3	0.00553708	0.0361111	8.7516	1580.54	94555	601	0.0052	1683	16543	0.144	10976	0	0		36	0.00038	1035
181	K562_B1_B01_010.fcs	E_GS3_98_1_mScarlet_Plate_006	03:50:35	A	4	MAPK Sensor	15	MM15	MM15: pFos_mScarlet	pFos_mScarlet	NarX = pFos_mScarlet NarL = 0	pFos	pFos_mScarlet		0	Lipofectamine 2000 [3 µL/µg]	1.5x	K562	mutated	BCR-ABL	no	1	0.00178948	0.0303704	0	1209.74	110540	0	0		0	0		457	0.0041	528	14921	0.135	8961
182	K562_B2_B02_011.fcs	E_GS3_98_1_mScarlet_Plate_006	03:51:43	A	5	MAPK Sensor	15	MM15	MM15: pFos_mScarlet	pFos_mScarlet	NarX = pFos_mScarlet NarL = 0	pFos	pFos_mScarlet		0	Lipofectamine 2000 [3 µL/µg]	1.5x	K562	mutated	BCR-ABL	no	2	0.0019069	0.0335714	0	1311.24	101248	0	0		0	0		480	0.0047	532	14199	0.14	9366
183	K562_B3_B03_012.fcs	E_GS3_98_1_mScarlet_Plate_006	03:52:51	A	6	MAPK Sensor	15	MM15	MM15: pFos_mScarlet	pFos_mScarlet	NarX = pFos_mScarlet NarL = 0	pFos	pFos_mScarlet		0	Lipofectamine 2000 [3 µL/µg]	1.5x	K562	mutated	BCR-ABL	no	3	0.00198173	0.0335714	0	1313.9	97046	0	0		0	0		453	0.0047	554	13589	0.14	9385
184	K562_B4_B04_013.fcs	E_GS3_98_1_mScarlet_Plate_006	03:53:59	B	1	MAPK Sensor	16	MM16	MM16: PY2_mScarlet	PY2_mScarlet	NarX = PY2_mScarlet NarL = 0	PY2	PY2_mScarlet		0	Lipofectamine 2000 [3 µL/µg]	1.5x	K562	mutated	BCR-ABL	no	1	0.00163327	0.0229167	0	1426.46	87179	0	0		0	0		291	0.0033	706	12585	0.144	9906
185	K562_B5_B05_014.fcs	E_GS3_98_1_mScarlet_Plate_006	03:55:07	B	2	MAPK Sensor	16	MM16	MM16: PY2_mScarlet	PY2_mScarlet	NarX = PY2_mScarlet NarL = 0	PY2	PY2_mScarlet		0	Lipofectamine 2000 [3 µL/µg]	1.5x	K562	mutated	BCR-ABL	no	2	0.00172611	0.0237762	0	1327.61	89363	0	0		0	0		306	0.0034	674	12798	0.143	9284
186	K562_B6_B06_015.fcs	E_GS3_98_1_mScarlet_Plate_006	03:56:15	B	3	MAPK Sensor	16	MM16	MM16: PY2_mScarlet	PY2_mScarlet	NarX = PY2_mScarlet NarL = 0	PY2	PY2_mScarlet		0	Lipofectamine 2000 [3 µL/µg]	1.5x	K562	mutated	BCR-ABL	no	3	0.00110347	0.0167883	0	1265.2	104252	0	0		0	0		243	0.0023	607	14276	0.137	9235
187	K562_B7_B07_016.fcs	E_GS3_98_1_mScarlet_Plate_006	03:57:23	B	4	MAPK Sensor	17	MM17	MM17: SRE_mScarlet	SRE_mScarlet	NarX = SRE_mScarlet NarL = 0	SRE	SRE_mScarlet		0	Lipofectamine 2000 [3 µL/µg]	1.5x	K562	mutated	BCR-ABL	no	1	0.00308856	0.0516667	0	1138.2	104358	0	0		0	0		650	0.0062	567	12516	0.12	9485
188	K562_B8_B08_017.fcs	E_GS3_98_1_mScarlet_Plate_006	03:58:31	B	5	MAPK Sensor	17	MM17	MM17: SRE_mScarlet	SRE_mScarlet	NarX = SRE_mScarlet NarL = 0	SRE	SRE_mScarlet		0	Lipofectamine 2000 [3 µL/µg]	1.5x	K562	mutated	BCR-ABL	no	2	0.00275848	0.0470588	0	1088.14	111478	0	0		0	0		619	0.0056	536	13288	0.119	9144
189	K562_B9_B09_018.fcs	E_GS3_98_1_mScarlet_Plate_006	03:59:39	B	6	MAPK Sensor	17	MM17	MM17: SRE_mScarlet	SRE_mScarlet	NarX = SRE_mScarlet NarL = 0	SRE	SRE_mScarlet		0	Lipofectamine 2000 [3 µL/µg]	1.5x	K562	mutated	BCR-ABL	no	3	0.00248609	0.0416	0	1144.12	124811	0	0		0	0		653	0.0052	547	15631	0.125	9153
190	LoVo_A7_A07_025.fcs	E_GS3_98_1_mCerulean_Plate_001	16:25:55	A	1	RAS Circuit	6	MM6	MM6: RAS Sensor_F.L.T.	RAS Sensor_F.L.T.	NarX = EF1a_RBDCRD-6xfL NarL = EF1a_Narl-F.L.T.	EF1a	EF1a_RBDCRD-6xfL		EF1a_Narl-F.L.T.	Fugene [3 µL/µg]	1.5x	LoVo	mutated	KRAS G13D	no	1	0.0020643	0.0311203	1.3515	654.701	16860	25	0.0015	901	823	0.0482	13583	0	0		11	0.00065	1031
191	LoVo_A8_A08_026.fcs	E_GS3_98_1_mCerulean_Plate_001	16:27:03	A	2	RAS Circuit	6	MM6	MM6: RAS Sensor_F.L.T.	RAS Sensor_F.L.T.	NarX = EF1a_RBDCRD-6xfL NarL = EF1a_Narl-F.L.T.	EF1a	EF1a_RBDCRD-6xfL		EF1a_Narl-F.L.T.	Fugene [3 µL/µg]	1.5x	LoVo	mutated	KRAS G13D	no	2	0.00160134	0.0316456	1.0395	649.143	18654	28	0.0015	693	899	0.0474	13695	0	0		22	0.0012	1024
192	LoVo_A9_A09_027.fcs	E_GS3_98_1_mCerulean_Plate_001	16:28:12	A	3	RAS Circuit	6	MM6	MM6: RAS Sensor_F.L.T.	RAS Sensor_F.L.T.	NarX = EF1a_RBDCRD-6xfL NarL = EF1a_Narl-F.L.T.	EF1a	EF1a_RBDCRD-6xfL		EF1a_Narl-F.L.T.	Fugene [3 µL/µg]	1.5x	LoVo	mutated	KRAS G13D	no	3	0.000837179	0.0311804	0.5208	622.09	24580	36	0.0014	372	1119	0.0449	13855	1	4.07E−3%	388	21	0.00085	1029
193	LoVo_A10_A10_028.fcs	E_GS3_98_1_mCerulean_Plate_001	16:29:20	A	4	RAS Circuit	10	MM10	MM10: PY2_NarL-F.L.T.	PY2_NarL-F.L.T.	NarX = EF1a_RBDCRD-6xfL NarL = PY2_NarL-F.L.T	PY2	EF1a_RBDCRD-6xfL		PY2_NarL-F.L.T	Fugene [3 µL/µg]	1.5x	LoVo	mutated	KRAS G13D	no	1	0.00119043	0.0339703	0.7968	669.338	37107	61	0.0016	498	1828	0.0471	14211	0	0		31	0.00084	1027
194	LoVo_A11_A11_029.fcs	E_GS3_98_1_mCerulean_Plate_001	16:30:29	A	5	RAS Circuit	10	MM10	MM10: PY2_NarL-F.L.T.	PY2_NarL-F.L.T.	NarX = EF1a_RBDCRD-6xfL NarL = PY2_NarL-F.L.T	PY2	EF1a_RBDCRD-6xfL		PY2_NarL-F.L.T	Fugene [3 µL/µg]	1.5x	LoVo	mutated	KRAS G13D	no	2	0.000746352	0.0277228	0.5236	701.546	34217	48	0.0014	374	1780	0.0505	13892	0	0		26	0.00076	1013
195	LoVo_A12_A12_030.fcs	E_GS3_98_1_mCerulean_Plate_001	16:31:38	A	6	RAS Circuit	10	MM10	MM10: PY2_NarL-F.L.T.	PY2_NarL-F.L.T.	NarX = EF1a_RBDCRD-6xfL NarL = PY2_NarL-F.L.T	PY2	EF1a_RBDCRD-6xfL		PY2_NarL-F.L.T	Fugene [3 µL/µg]	1.5x	LoVo	mutated	KRAS G13D	no	3	0.00162704	0.0366795	1.216	747.37	36634	70	0.0019	640	1958	0.0518	14428	0	0		21	0.00057	1016
196	LoVo_B10_B10_034.fcs	E_GS3_98_1_mCerulean_Plate_001	16:36:12	B	4	RAS Circuit	11	MM11	MM11: PY2_all_F.L.T.	PY2_all_F.L.T.	NarX = PY2_RBDCRD-6xfL NarL = PY2_NarL-F.L.T	PY2	PY2_RBDCRD-6xfL		PY2_NarL-F.L.T	Fugene [3 µL/µg]	1.5x	LoVo	mutated	KRAS G13D	no	1	0.00612899	0.127803	2.7759	452.913	38162	223	0.0057	487	1753	0.0446	10155	0	0		20	0.00052	1021
197	LoVo_B11_B11_035.fcs	E_GS3_98_1_mCerulean_Plate_001	16:37:21	B	5	RAS Circuit	11	MM11	MM11: PY2_all_F.L.T.	PY2_all_F.L.T.	NarX = PY2_RBDCRD-6xfL NarL = PY2_NarL-F.L.T	PY2	PY2_RBDCRD-6xfL		PY2_NarL-F.L.T	Fugene [3 µL/µg]	1.5x	LoVo	mutated	KRAS G13D	no	2	0.00651618	0.129176	2.8652	439.706	36781	218	0.0058	494	1700	0.0449	9793	0	0		27	0.00073	1027
198	LoVo_B12_B12_036.fcs	E_GS3_98_1_mCerulean_Plate_001	16:38:31	B	6	RAS Circuit	11	MM11	MM11: PY2_all_F.L.T.	PY2_all_F.L.T.	NarX = PY2_RBDCRD-6xfL NarL = PY2_NarL-F.L.T	PY2	PY2_RBDCRD-6xfL		PY2_NarL-F.L.T	Fugene [3 µL/µg]	1.5x	LoVo	mutated	KRAS G13D	no	3	0.00644244	0.122056	2.8272	438.84	35616	215	0.0057	496	1748	0.0467	9397	0	0		22	0.00062	1004
199	LoVo_C7_C07_037.fcs	E_GS3_98_1_mCerulean_Plate_001	16:39:39	C	1	RAS Circuit	8	MM8	MM8: pFos_NarL-F.L.T.	pFos_NarL-F.L.T.	NarX = EF1a_RBDCRD-6xfL NarL = pFos_NarL-F.L.T	pFos	EF1a_RBDCRD-6xfL		pFos_NarL-F.L.T	Fugene [3 µL/µg]	1.5x	LoVo	mutated	KRAS G13D	no	1	0.000127848	0.0109302	0.07802	610.256	33456	16	0.00047	166	1470	0.043	14192	0	0		20	0.0006	1044
200	LoVo_C8_C08_038.fcs	E_GS3_98_1_mCerulean_Plate_001	16:40:48	C	2	RAS Circuit	8	MM8	MM8: pFos_NarL-F.L.T.	pFos_NarL-F.L.T.	NarX = EF1a_RBDCRD-6xfL NarL = pFos_NarL-F.L.T	pFos	EF1a_RBDCRD-6xfL		pFos_NarL-F.L.T	Fugene [3 µL/µg]	1.5x	LoVo	mutated	KRAS G13D	no	2	0.000337216	0.00898345	0.19532	579.214	30574	12	0.00038	514	1323	0.0423	13693	0	0		21	0.00069	1031
201	LoVo_C9_C09_039.fcs	E_GS3_98_1_mCerulean_Plate_001	16:41:56	C	3	RAS Circuit	8	MM8	MM8: pFos_NarL-F.L.T.	pFos_NarL-F.L.T.	NarX = EF1a_RBDCRD-6xfL NarL = pFos_NarL-F.L.T	pFos	EF1a_RBDCRD-6xfL		pFos_NarL-F.L.T	Fugene [3 µL/µg]	1.5x	LoVo	mutated	KRAS G13D	no	3	0.000340857	0.0162996	0.22126	649.129	36806	28	0.00074	299	1721	0.0454	14298	0	0		25	0.00068	1033
202	LoVo_C10_C10_040.fcs	E_GS3_98_1_mCerulean_Plate_001	16:43:05	C	4	Control	12	MM12	MM12: RBDr89lCRDc168S_Sensor	RBDr89lCRDc168S_Sensor	NarX = EF1a_RBDr89lCRDc168s NarL = EF1a_Narl-F.L.T.	EF1a	EF1a_RBDr89lCRDc168s		EF1a_Narl-F.L.T.	Fugene [3 µL/µg]	1.5x	LoVo	mutated	KRAS G13D	no	1	3.75805e-05	0.0041502	0.02898	771.144	34715	8	0.00021	138	1891	0.0506	15240	0	0		20	0.00058	1038
203	LoVo_C11_C11_041.fcs	E_GS3_98_1_mCerulean_Plate_001	16:44:14	C	5	Control	12	MM12	MM12: RBDr89lCRDc168S_Sensor	RBDr89lCRDc168S_Sensor	NarX = EF1a_RBDr89lCRDc168s NarL = EF1a_Narl-F.L.T.	EF1a	EF1a_RBDr89lCRDc168s		EF1a_Narl-F.L.T.	Fugene [3 µL/µg]	1.5x	LoVo	mutated	KRAS G13D	no	2	2.60501e-05	0.00346232	0.01887	724.372	38747	7	0.00017	111	1965	0.0491	14753	0	0		13	0.00034	1032
204	LoVo_C12_C12_042.fcs	E_GS3_98_1_mCerulean_Plate_001	16:45:23	C	6	Control	12	MM12	MM12: RBDr89lCRDc168S_Sensor	RBDr89lCRDc168S_Sensor	NarX = EF1a_RBDr89lCRDc168s NarL = EF1a_Narl-F.L.T.	EF1a	EF1a_RBDr89lCRDc168s		EF1a_Narl-F.L.T.	Fugene [3 µL/µg]	1.5x	LoVo	mutated	KRAS G13D	no	3	1.02297e-05	0.0014759	0.0071148	695.507	39534	3	7.35e-05	96.8	2032	0.0498	13966	0	0		21	0.00053	1021
205	LoVo_D7_D07_043.fcs	E_GS3_98_1_mCerulean_Plate_001	16:46:32	D	1	RAS Circuit	9	MM9	MM9: SRE_NarL-F.L.T.	SRE_NarL-F.L.T.	NarX = EF1a_RBDCRD-6xfL NarL = SRE_NarL-F.L.T	SRE	EF1a_RBDCRD-6xfL		SRE_NarL-F.L.T	Fugene [3 µL/µg]	1.5x	LoVo	mutated	KRAS G13D	no	1	0.000518199	0.0187935	0.34587	667.447	25575	21	0.00081	427	1124	0.0431	15486	0	0		14	0.00055	1005
206	LoVo_D8_D08_044.fcs	E_GS3_98_1_mCerulean_Plate_001	16:47:40	D	2	RAS Circuit	9	MM9	MM9: SRE_NarL-F.L.T.	SRE_NarL-F.L.T.	NarX = EF1a_RBDCRD-6xfL NarL = SRE_NarL-F.L.T	SRE	EF1a_RBDCRD-6xfL		SRE_NarL-F.L.T	Fugene [3 µL/µg]	1.5x	LoVo	mutated	KRAS G13D	no	2	0.000787622	0.0178414	0.48681	618.076	22944	19	0.00081	601	1065	0.0454	13614	0	0		20	0.00087	1010
207	LoVo_D9_D09_045.fcs	E_GS3_98_1_mCerulean_Plate_001	16:48:49	D	3	RAS Circuit	9	MM9	MM9: SRE_NarL-F.L.T.	SRE_NarL-F.L.T.	NarX = EF1a_RBDCRD-6xfL NarL = SRE_NarL-F.L.T	SRE	EF1a_RBDCRD-6xfL		SRE_NarL-F.L.T	Fugene [3 µL/µg]	1.5x	LoVo	mutated	KRAS G13D	no	3	0.000477784	0.022	0.3355	702.2	29046	33	0.0011	305	1496	0.05	14044	0	0		21	0.00072	1015
208	LoVo_B1_B01_010.fcs	E_GS3_98_1_mScarlet_Plate_005	23:47:09	A	4	MAPK Sensor	15	MM15	MM15: pFos_mScarlet	pFos_mScarlet	NarX = pFos_mScarlet NarL = 0	pFos	pFos_mScarlet		0	Fugene [3 µL/µg]	1.5x	LoVo	mutated	KRAS G13D	no	1	0.000409308	0.0114407	0	514.527	40674	0	0		0	0		22	0.00054	390	1919	0.0472	10901
209	LoVo_B2_B02_011.fcs	E_GS3_98_1_mScarlet_Plate_005	23:48:17	A	5	MAPK Sensor	15	MM15	MM15: pFos_mScarlet	pFos_mScarlet	NarX = pFos_mScarlet NarL = 0	pFos	pFos_mScarlet		0	Fugene [3 µL/µg]	1.5x	LoVo	mutated	KRAS G13D	no	2	0.000525589	0.0131222	0	495.482	41535	0	0		0	0		24	0.00058	449	1835	0.0442	11210
210	LoVo_B3_B03_012.fcs	E_GS3_98_1_mScarlet_Plate_005	23:49:25	A	6	MAPK Sensor	15	MM15	MM15: pFos_mScarlet	pFos_mScarlet	NarX = pFos_mScarlet NarL = 0	pFos	pFos_mScarlet		0	Fugene [3 µL/µg]	1.5x	LoVo	mutated	KRAS G13D	no	3	0.000372482	0.0103926	0	488.078	40187	0	0		0	0		18	0.00045	404	1742	0.0433	11272
211	LoVo_B4_B04_013.fcs	E_GS3_98_1_mScarlet_Plate_005	23:50:33	B	1	MAPK Sensor	16	MM16	MM16: PY2_mScarlet	PY2_mScarlet	NarX = PY2_mScarlet NarL = 0	PY2	PY2_mScarlet		0	Fugene [3 µL/µg]	1.5x	LoVo	mutated	KRAS G13D	no	1	0.00334528	0.0825959	0	497.177	28164	0	0		0	0		79	0.0028	594	956	0.0339	14666
212	LoVo_B5_B05_014.fcs	E_GS3_98_1_mScarlet_Plate_005	23:51:41	B	2	MAPK Sensor	16	MM16	MM16: PY2_mScarlet	PY2_mScarlet	NarX = PY2_mScarlet NarL = 0	PY2	PY2_mScarlet		0	Fugene [3 µL/µg]	1.5x	LoVo	mutated	KRAS G13D	no	2	0.00440231	0.0830946	0	416.985	42409	0	0		0	0		123	0.0029	633	1479	0.0349	11948
213	LoVo_B6_B06_015.fcs	E_GS3_98_1_mScarlet_Plate_005	23:52:49	B	3	MAPK Sensor	16	MM16	MM16: PY2_mScarlet	PY2_mScarlet	NarX = PY2_mScarlet NarL = 0	PY2	PY2_mScarlet		0	Fugene [3 µL/µg]	1.5x	LoVo	mutated	KRAS G13D	no	3	0.00303319	0.0591716	0	408.811	48323	0	0		0	0		95	0.002	620	1631	0.0338	12095
214	LoVo_B7_B07_016.fcs	E_GS3_98_1_mScarlet_Plate_005	23:53:56	B	4	MAPK Sensor	17	MM17	MM17: SRE_mScarlet	SRE_mScarlet	NarX = SRE_mScarlet NarL = 0	SRE	SRE_mScarlet		0	Fugene [3 µL/µg]	1.5x	LoVo	mutated	KRAS G13D	no	1	0.00059842	0.0132035	0	558.604	47451	0	0		0	0		29	0.00061	548	2194	0.0462	12091
215	LoVo_B8_B08_017.fcs	E_GS3_98_1_mScarlet_Plate_005	23:55:04	B	5	MAPK Sensor	17	MM17	MM17: SRE_mScarlet	SRE_mScarlet	NarX = SRE_mScarlet NarL = 0	SRE	SRE_mScarlet		0	Fugene [3 µL/µg]	1.5x	LoVo	mutated	KRAS G13D	no	2	0.000565934	0.0133484	0	542.113	42566	0	0		0	0		25	0.00059	520	1881	0.0442	12265
216	LoVo_B9_B09_018.fcs	E_GS3_98_1_mScarlet_Plate_005	23:56:13	B	6	MAPK Sensor	17	MM17	MM17: SRE_mScarlet	SRE_mScarlet	NarX = SRE_mScarlet NarL = 0	SRE	SRE_mScarlet		0	Fugene [3 µL/µg]	1.5x	LoVo	mutated	KRAS G13D	no	3	0.000537917	0.0122984	0	637.31	29740	0	0		0	0		18	0.00061	562	1474	0.0496	12849
217	MCF-7_A1_A01_001.fcs	E_GS3_98_1_mCerulean_Plate_003	22:18:28	A	1	RAS Circuit	6	MM6	MM6: RAS Sensor_F.L.T.	RAS Sensor_F.L.T.	NarX = EF1a_RBDCRD-6xfL NarL = EF1a_Narl-F.L.T.	EF1a	EF1a_RBDCRD-6xfL		EF1a_Narl-F.L.T.	Fugene [3 µL/µg]	1.5x	MCF-7	wildtype	wt	yes	1	0.00180887	0.0443548	1.9074	1054.47	20329	76	0.0033	578	1709	0.0744	14173	8	0.00039	174762	23	0.0011	1212
218	MCF-7_A2_A02_002.fcs	E_GS3_98_1_mCerulean_Plate_003	22:19:36	A	2	RAS Circuit	6	MM6	MM6: RAS Sensor_F.L.T.	RAS Sensor_F.L.T.	NarX = EF1a_RBDCRD-6xfL NarL = EF1a_Narl-F.L.T.	EF1a	EF1a_RBDCRD-6xfL		EF1a_Narl-F.L.T.	Fugene [3 µL/µg]	1.5x	MCF-7	wildtype	wt	yes	2	0.00195738	0.0481348	2.604	1330.35	17292	80	0.004	651	1665	0.0831	16009	9	0.00052	165693	21	0.0012	1273
219	MCF-7_A3_A03_003.fcs	E_GS3_98_1_mCerulean_Plate_003	22:20:44	A	3	RAS Circuit	6	MM6	MM6: RAS Sensor_F.L.T.	RAS Sensor_F.L.T.	NarX = EF1a_RBDCRD-6xfL NarL = EF1a_Narl-F.L.T.	EF1a	EF1a_RBDCRD-6xfL		EF1a_Narl-F.L.T.	Fugene [3 µL/µg]	1.5x	MCF-7	wildtype	wt	yes	3	0.00121012	0.0314389	1.4274	1179.55	16267	48	0.0026	549	1531	0.0827	14263	4	0.00025	169768	15	0.00092	1145
220	MCF-7_A4_A04_004.fcs	E_GS3_98_1_mCerulean_Plate_003	22:21:52	A	4	RAS Circuit	10	MM10	MM10: PY2_NarL-F.L.T.	PY2_NarL-F.L.T.	NarX = EF1a_RBDCRD-6xfL NarL = PY2_NarL-F.L.T	PY2	EF1a_RBDCRD-6xfL		PY2_NarL-F.L.T	Fugene [3 µL/µg]	1.5x	MCF-7	wildtype	wt	yes	1	0.000246761	0.018315	0.2775	1124.57	20504	35	0.0015	185	1904	0.0819	13731	5	0.00024	203910	24	0.0012	1124
221	MCF-7_A5_A05_005.fcs	E_GS3_98_1_mCerulean_Plate_003	22:23:01	A	5	RAS Circuit	10	MM10	MM10: PY2_NarL-F.L.T.	PY2_NarL-F.L.T.	NarX = EF1a_RBDCRD-6xfL NarL = PY2_NarL-F.L.T	PY2	EF1a_RBDCRD-6xfL		PY2_NarL-F.L.T	Fugene [3 µL/µg]	1.5x	MCF-7	wildtype	wt	yes	2	0.000591584	0.0247642	0.7539	1274.37	17964	41	0.0021	359	1689	0.0848	15028	3	0.00017	189348	17	0.00095	1116
222	MCF-7_A6_A06_006.fcs	E_GS3_98_1_mCerulean_Plate_003	22:24:09	A	6	RAS Circuit	10	MM10	MM10: PY2_NarL-F.L.T.	PY2_NarL-F.L.T.	NarX = EF1a_RBDCRD-6xfL NarL = PY2_NarL-F.L.T	PY2	EF1a_RBDCRD-6xfL		PY2_NarL-F.L.T	Fugene [3 µL/µg]	1.5x	MCF-7	wildtype	wt	yes	3	0.000580633	0.0206186	0.6112	1052.64	18030	32	0.0016	382	1589	0.0776	13565	1	5.55E−3%	157666	11	0.00061	1132
223	MCF-7_B4_B04_010.fcs	E_GS3_98_1_mCerulean_Plate_003	22:28:41	B	4	RAS Circuit	11	MM11	MM11: PY2_all_F.L.T.	PY2_all_F.L.T.	NarX = PY2_RBDCRD-6xfL NarL = PY2_NarL-F.L.T	PY2	PY2_RBDCRD-6xfL		PY2_NarL-F.L.T	Fugene [3 µL/µg]	1.5x	MCF-7	wildtype	wt	yes	1	0.000285786	0.0163522	0.2977	1041.69	16472	26	0.0013	229	1557	0.0795	13103	4	0.00024	136972	13	0.00079	1246
224	MCF-7_B5_B05_011.fcs	E_GS3_98_1_mCerulean_Plate_003	22:29:49	B	5	RAS Circuit	11	MM11	MM11: PY2_all_F.L.T.	PY2_all_F.L.T.	NarX = PY2_RBDCRD-6xfL NarL = PY2_NarL-F.L.T	PY2	PY2_RBDCRD-6xfL		PY2_NarL-F.L.T	Fugene [3 µL/µg]	1.5x	MCF-7	wildtype	wt	yes	2	0.000278949	0.0162822	0.2952	1058.26	17603	24	0.0012	246	1439	0.0737	14359	4	0.00023	185472	15	0.00085	1159
225	MCF-7_B6_B06_012.fcs	E_GS3_98_1_mCerulean_Plate_003	22:30:57	B	6	RAS Circuit	11	MM11	MM11: PY2_all_F.L.T.	PY2_all_F.L.T.	NarX = PY2_RBDCRD-6xfL NarL = PY2_NarL-F.L.T	PY2	PY2_RBDCRD-6xfL		PY2_NarL-F.L.T	Fugene [3 µL/µg]	1.5x	MCF-7	wildtype	wt	yes	3	0.000185082	0.014742	0.21	1134.63	17295	23	0.0012	175	1557	0.0814	13939	1	5.78E−3%	280	15	0.00087	1062
226	MCF-7_C1_C01_013.fcs	E_GS3_98_1_mCerulean_Plate_003	22:32:05	C	1	RAS Circuit	8	MM8	MM8: pFos_NarL-F.L.T.	pFos_NarL-F.L.T.	NarX = EF1a_RBDCRD-6xfL NarL = pFos_NarL-F.L.T	pFos	EF1a_RBDCRD-6xfL		pFos_NarL-F.L.T	Fugene [3 µL/µg]	1.5x	MCF-7	wildtype	wt	yes	1	0.000246538	0.0067734	0.30745	1247.07	17318	11	0.00055	559	1609	0.0812	15358	11	0.00064	160654	25	0.0014	1169
227	MCF-7_C2_C02_014.fcs	E_GS3_98_1_mCerulean_Plate_003	22:33:14	C	2	RAS Circuit	8	MM8	MM8: pFos_NarL-F.L.T.	pFos_NarL-F.L.T.	NarX = EF1a_RBDCRD-6xfL NarL = pFos_NarL-F.L.T	pFos	EF1a_RBDCRD-6xfL		pFos_NarL-F.L.T	Fugene [3 µL/µg]	1.5x	MCF-7	wildtype	wt	yes	2	0.00013197	0.00562572	0.17297	1310.68	16455	9	0.00049	353	1614	0.0871	15048	7	0.00043	183027	16	0.00097	1159
228	MCF-7_C3_C03_015.fcs	E_GS3_98_1_mCerulean_Plate_003	22:34:22	C	3	RAS Circuit	8	MM8	MM8: pFos_NarL-F.L.T.	pFos_NarL-F.L.T.	NarX = EF1a_RBDCRD-6xfL NarL = pFos_NarL-F.L.T	pFos	EF1a_RBDCRD-6xfL		pFos_NarL-F.L.T	Fugene [3 µL/µg]	1.5x	MCF-7	wildtype	wt	yes	3	0.000119359	0.00909091	0.15879	1330.35	15829	14	0.00079	201	1534	0.0869	15309	4	0.00025	184034	12	0.00076	1077
229	MCF-7_C4_C04_016.fcs	E_GS3_98_1_mCerulean_Plate_003	22:35:30	C	4	Control	12	MM12	MM12: RBDr89lCRDc168S_Sensor	RBDr89lCRDc168S_Sensor	NarX = EF1a_RBDr89lCRDc168s NarL = EF1a_Narl-F.L.T.	EF1a	EF1a_RBDr89lCRDc168s		EF1a_Narl-F.L.T.	Fugene [3 µL/µg]	1.5x	MCF-7	wildtype	wt	yes	1	0.000267256	0.0117791	0.32256	1206.93	17176	19	0.00096	336	1613	0.0815	14809	0	0		12	0.0007	1027
230	MCF-7_C5_C05_017.fcs	E_GS3_98_1_mCerulean_Plate_003	22:36:38	C	5	Control	12	MM12	MM12: RBDr89lCRDc168S_Sensor	RBDr89lCRDc168S_Sensor	NarX = EF1a_RBDr89lCRDc168s NarL = EF1a_Narl-F.L.T.	EF1a	EF1a_RBDr89lCRDc168s		EF1a_Narl-F.L.T.	Fugene [3 µL/µg]	1.5x	MCF-7	wildtype	wt	yes	2	5.41361e-05	0.00619112	0.05336	985.664	15723	8	0.00046	116	1296	0.0743	13266	0	0		11	0.0007	1064
231	MCF-7_C6_C06_018.fcs	E_GS3_98_1_mCerulean_Plate_003	22:37:47	C	6	Control	12	MM12	MM12: RBDr89lCRDc168S_Sensor	RBDr89lCRDc168S_Sensor	NarX = EF1a_RBDr89lCRDc168s NarL = EF1a_Narl-F.L.T.	EF1a	EF1a_RBDr89lCRDc168s		EF1a_Narl-F.L.T.	Fugene [3 µL/µg]	1.5x	MCF-7	wildtype	wt	yes	3	0.000182556	0.0121059	0.22656	1241.04	17448	19	0.00096	236	1568	0.0793	15650	3	0.00017	189807	12	0.00069	1210
232	MCF-7_D1_D01_019.fcs	E_GS3_98_1_mCerulean_Plate_003	22:38:55	D	1	RAS Circuit	9	MM9	MM9: SRE_NarL-F.L.T.	SRE_NarL-F.L.T.	NarX = EF1a_RBDCRD-6xfL NarL = SRE_NarL-F.L.T	SRE	EF1a_RBDCRD-6xfL		SRE_NarL-F.L.T	Fugene [3 µL/µg]	1.5x	MCF-7	wildtype	wt	yes	1	0.000163877	0.0120198	0.19303	1177.9	19006	21	0.00097	199	1740	0.0807	14596	7	0.00037	190282	19	0.001	1133
233	MCF-7_D2_D02_020.fcs	E_GS3_98_1_mCerulean_Plate_003	22:40:03	D	2	RAS Circuit	9	MM9	MM9: SRE_NarL-F.L.T.	SRE_NarL-F.L.T.	NarX = EF1a_RBDCRD-6xfL NarL = SRE_NarL-F.L.T	SRE	EF1a_RBDCRD-6xfL		SRE_NarL-F.L.T	Fugene [3 µL/µg]	1.5x	MCF-7	wildtype	wt	yes	2	0.000242308	0.0145089	0.3302	1362.73	17359	25	0.0013	254	1764	0.0896	15209	2	0.00012	236882	15	0.00086	1076
234	MCF-7_D3_D03_021.fcs	E_GS3_98_1_mCerulean_Plate_003	22:41:11	D	3	RAS Circuit	9	MM9	MM9: SRE_NarL-F.L.T.	SRE_NarL-F.L.T.	NarX = EF1a_RBDCRD-6xfL NarL = SRE_NarL-F.L.T	SRE	EF1a_RBDCRD-6xfL		SRE_NarL-F.L.T	Fugene [3 µL/µg]	1.5x	MCF-7	wildtype	wt	yes	3	0.00014687	0.00932401	0.1864	1269.15	15377	14	0.0008	233	1498	0.0858	14792	6	0.00039	193327	24	0.0016	1120
235	MCF-7_E1_E01_037.fcs	E_GS3_98_1_mScarlet_Plate_006	04:22:05	A	4	MAPK Sensor	15	MM15	MM15: pFos_mScarlet	pFos_mScarlet	NarX = pFos_mScarlet NarL = 0	pFos	pFos_mScarlet		0	Fugene [3 µL/µg]	1.5x	MCF-7	wildtype	wt	yes	1	0.000185099	0.00737952	0	802.112	24489	0	0		0	0		12	0.00049	303	1625	0.0664	12080
236	MCF-7_E2_E02_038.fcs	E_GS3_98_1_mScarlet_Plate_006	04:23:14	A	5	MAPK Sensor	15	MM15	MM15: pFos_mScarlet	pFos_mScarlet	NarX = pFos_mScarlet NarL = 0	pFos	pFos_mScarlet		0	Fugene [3 µL/µg]	1.5x	MCF-7	wildtype	wt	yes	2	0.000201866	0.00723589	0	958.555	24045	0	0		0	0		12	0.0005	387	1661	0.0691	13872
237	MCF-7_E3_E03_039.fcs	E_GS3_98_1_mScarlet_Plate_006	04:24:21	A	6	MAPK Sensor	15	MM15	MM15: pFos_mScarlet	pFos_mScarlet	NarX = pFos_mScarlet NarL = 0	pFos	pFos_mScarlet		0	Fugene [3 µL/µg]	1.5x	MCF-7	wildtype	wt	yes	3	0.000171889	0.0072238	0	913.846	23629	0	0		0	0		12	0.00051	308	1668	0.0706	12944
238	MCF-7_E4_E04_040.fcs	E_GS3_98_1_mScarlet_Plate_006	04:25:29	B	1	MAPK Sensor	16	MM16	MM16: PY2_mScarlet	PY2_mScarlet	NarX = PY2_mScarlet NarL = 0	PY2	PY2_mScarlet		0	Fugene [3 µL/µg]	1.5x	MCF-7	wildtype	wt	yes	1	0.000121895	0.00303541	0	571.474	28324	0	0		0	0		5	0.00018	387	1679	0.0593	9637
239	MCF-7_E5_E05_041.fcs	E_GS3_98_1_mScarlet_Plate_006	04:26:37	B	2	MAPK Sensor	16	MM16	MM16: PY2_mScarlet	PY2_mScarlet	NarX = PY2_mScarlet NarL = 0	PY2	PY2_mScarlet		0	Fugene [3 µL/µg]	1.5x	MCF-7	wildtype	wt	yes	2	0.000249543	0.00594595	0	474.747	27064	0	0		0	0		9	0.00033	359	1503	0.0555	8554
240	MCF-7_E6_E06_042.fcs	E_GS3_98_1_mScarlet_Plate_006	04:27:46	B	3	MAPK Sensor	16	MM16	MM16: PY2_mScarlet	PY2_mScarlet	NarX = PY2_mScarlet NarL = 0	PY2	PY2_mScarlet		0	Fugene [3 µL/µg]	1.5x	MCF-7	wildtype	wt	yes	3	0.000109382	0.00274443	0	485.639	25147	0	0		0	0		4	0.00016	332	1467	0.0583	8330
241	MCF-7_E7_E07_043.fcs	E_GS3_98_1_mScarlet_Plate_006	04:28:53	B	4	MAPK Sensor	17	MM17	MM17: SRE_mScarlet	SRE_mScarlet	NarX = SRE_mScarlet NarL = 0	SRE	SRE_mScarlet		0	Fugene [3 µL/µg]	1.5x	MCF-7	wildtype	wt	yes	1	0.000647798	0.0146179	0	631.679	18140	0	0		0	0		16	0.00088	465	1092	0.0602	10493
242	MCF-7_E8_E08_044.fcs	E_GS3_98_1_mScarlet_Plate_006	04:30:02	B	5	MAPK Sensor	17	MM17	MM17: SRE_mScarlet	SRE_mScarlet	NarX = SRE_mScarlet NarL = 0	SRE	SRE_mScarlet		0	Fugene [3 µL/µg]	1.5x	MCF-7	wildtype	wt	yes	2	0.000872004	0.00918675	0	745.008	19546	0	0		0	0		12	0.00061	1065	1298	0.0664	11220
243	MCF-7_E9_E09_045.fcs	E_GS3_98_1_mScarlet_Plate_006	04:31:11	B	6	MAPK Sensor	17	MM17	MM17: SRE_mScarlet	SRE_mScarlet	NarX = SRE_mScarlet NarL = 0	SRE	SRE_mScarlet		0	Fugene [3 µL/µg]	1.5x	MCF-7	wildtype	wt	yes	3	0.000513553	0.0112285	0	976.53	20112	0	0		0	0		17	0.00085	590	1523	0.0757	12900
244	SKOV-3_A1_A01_001.fcs	E_GS3_98_1_mCerulean_Plate_004	20:54:02	A	1	RAS Circuit	6	MM6	MM6: RAS Sensor_F.L.T.	RAS Sensor_F.L.T.	NarX = EF1a_RBDCRD-6xfL NarL = EF1a_Narl-F.L.T.	EF1a	EF1a_RBDCRD-6xfL		EF1a_Narl-F.L.T.	Fugene [3 µL/µg]	1.5x	SKOV-3	wildtype	wt	yes	1	0.00166971	0.0258152	0.9728	582.618	12142	25	0.0019	512	994	0.0736	7916	0	0		6	0.00049	1030
245	SKOV-3_A2_A02_002.fcs	E_GS3_98_1_mCerulean_Plate_004	20:55:10	A	2	RAS Circuit	6	MM6	MM6: RAS Sensor_F.L.T.	RAS Sensor_F.L.T.	NarX = EF1a_RBDCRD-6xfL NarL = EF1a_Narl-F.L.T.	EF1a	EF1a_RBDCRD-6xfL		EF1a_Narl-F.L.T.	Fugene [3 µL/µg]	1.5x	SKOV-3	wildtype	wt	yes	2	0.0015358	0.0355731	0.8964	583.671	9528	29	0.0027	332	808	0.0759	7690	0	0		6	0.00063	1045
246	SKOV-3_A3_A03_003.fcs	E_GS3_98_1_mCerulean_Plate_004	20:56:18	A	3	RAS Circuit	6	MM6	MM6: RAS Sensor_F.L.T.	RAS Sensor_F.L.T.	NarX = EF1a_RBDCRD-6xfL NarL = EF1a_Narl-F.L.T.	EF1a	EF1a_RBDCRD-6xfL		EF1a_Narl-F.L.T.	Fugene [3 µL/µg]	1.5x	SKOV-3	wildtype	wt	yes	3	0.00206691	0.0206718	1.2096	585.221	10874	20	0.0016	756	942	0.0774	7561	0	0		3	0.00028	1033
247	SKOV-3_A4_A04_004.fcs	E_GS3_98_1_mCerulean_Plate_004	20:57:26	A	4	RAS Circuit	10	MM10	MM10: PY2_NarL-F.L.T.	PY2_NarL-F.L.T.	NarX = EF1a_RBDCRD-6xfL NarL = PY2_NarL-F.L.T	PY2	EF1a_RBDCRD-6xfL		PY2_NarL-F.L.T	Fugene [3 µL/µg]	1.5x	SKOV-3	wildtype	wt	yes	1	0.000601972	0.0195838	0.4144	688.404	13971	25	0.0016	259	1287	0.0817	8426	0	0		5	0.00036	1020
248	SKOV-3_A5_A05_005.fcs	E_GS3_98_1_mCerulean_Plate_004	20:58:35	A	5	RAS Circuit	10	MM10	MM10: PY2_NarL-F.L.T.	PY2_NarL-F.L.T.	NarX = EF1a_RBDCRD-6xfL NarL = PY2_NarL-F.L.T	PY2	EF1a_RBDCRD-6xfL		PY2_NarL-F.L.T	Fugene [3 µL/µg]	1.5x	SKOV-3	wildtype	wt	yes	2	0.00119871	0.0248691	0.6897	575.368	12509	26	0.0019	363	1061	0.0764	7531	1	7.99E−3%	154333	3	0.00024	1175
249	SKOV-3_A6_A06_006.fcs	E_GS3_98_1_mCerulean_Plate_004	20:59:43	A	6	RAS Circuit	10	MM10	MM10: PY2_NarL-F.L.T.	PY2_NarL-F.L.T.	NarX = EF1a_RBDCRD-6xfL NarL = PY2_NarL-F.L.T	PY2	EF1a_RBDCRD-6xfL		PY2_NarL-F.L.T	Fugene [3 µL/µg]	1.5x	SKOV-3	wildtype	wt	yes	3	0.00105761	0.0315934	0.5773	545.854	11929	31	0.0023	251	963	0.0728	7498	0	0		6	0.0005	1042
250	SKOV-3_B4_B04_010.fcs	E_GS3_98_1_mCerulean_Plate_004	21:04:16	B	4	RAS Circuit	11	MM11	MM11: PY2_all_F.L.T.	PY2_all_F.L.T.	NarX = PY2_RBDCRD-6xfL NarL = PY2_NarL-F.L.T	PY2	PY2_RBDCRD-6xfL		PY2_NarL-F.L.T	Fugene [3 µL/µg]	1.5x	SKOV-3	wildtype	wt	yes	1	0.00272746	0.0374813	1.2025	440.887	13915	38	0.0025	481	1024	0.0667	6610	0	0		8	0.00057	1060
251	SKOV-3_B5_B05_011.fcs	E_GS3_98_1_mCerulean_Plate_004	21:05:24	B	5	RAS Circuit	11	MM11	MM11: PY2_all_F.L.T.	PY2_all_F.L.T.	NarX = PY2_RBDCRD-6xfL NarL = PY2_NarL-F.L.T	PY2	PY2_RBDCRD-6xfL		PY2_NarL-F.L.T	Fugene [3 µL/µg]	1.5x	SKOV-3	wildtype	wt	yes	2	0.0029649	0.0482115	1.2958	437.047	12853	44	0.0031	418	917	0.0643	6797	0	0		6	0.00047	1069
252	SKOV-3_B6_B06_012.fcs	E_GS3_98_1_mCerulean_Plate_004	21:06:32	B	6	RAS Circuit	11	MM11	MM11: PY2_all_F.L.T.	PY2_all_F.L.T.	NarX = PY2_RBDCRD-6xfL NarL = PY2_NarL-F.L.T	PY2	PY2_RBDCRD-6xfL		PY2_NarL-F.L.T	Fugene [3 µL/µg]	1.5x	SKOV-3	wildtype	wt	yes	3	0.00145445	0.0235294	0.6848	470.832	12261	22	0.0016	428	924	0.068	6924	0	0		3	0.00024	1001
253	SKOV-3_C1_C01_013.fcs	E_GS3_98_1_mCerulean_Plate_004	21:07:40	C	1	RAS Circuit	8	MM8	MM8: pFos_NarL-F.L.T.	pFos_NarL-F.L.T.	NarX = EF1a_RBDCRD-6xfL NarL = pFos_NarL-F.L.T	pFos	EF1a_RBDCRD-6xfL		pFos_NarL-F.L.T	Fugene [3 µL/µg]	1.5x	SKOV-3	wildtype	wt	yes	1	0.00123356	0.0272374	0.7056	572.005	10107	24	0.0021	336	873	0.0771	7419	0	0		1	9.89E−3%	1114
254	SKOV-3_C2_C02_014.fcs	E_GS3_98_1_mCerulean_Plate_004	21:08:49	C	2	RAS Circuit	8	MM8	MM8: pFos_NarL-F.L.T.	pFos_NarL-F.L.T.	NarX = EF1a_RBDCRD-6xfL NarL = pFos_NarL-F.L.T	pFos	EF1a_RBDCRD-6xfL		pFos_NarL-F.L.T	Fugene [3 µL/µg]	1.5x	SKOV-3	wildtype	wt	yes	2	0.00148771	0.0405904	0.9768	656.579	8845	33	0.0033	296	812	0.0813	8076	1	0.00011	155759	2	0.00023	1064
255	SKOV-3_C3_C03_015.fcs	E_GS3_98_1_mCerulean_Plate_004	21:09:57	C	3	RAS Circuit	8	MM8	MM8: pFos_NarL-F.L.T.	pFos_NarL-F.L.T.	NarX = EF1a_RBDCRD-6xfL NarL = pFos_NarL-F.L.T	pFos	EF1a_RBDCRD-6xfL		pFos_NarL-F.L.T	Fugene [3 µL/µg]	1.5x	SKOV-3	wildtype	wt	yes	3	0.00173143	0.033462	1.092	630.691	10880	32	0.0026	420	950	0.0777	8117	0	0		7	0.00064	1040
256	SKOV-3_C4_C04_016.fcs	E_GS3_98_1_mCerulean_Plate_004	21:11:05	C	4	Control	12	MM12	MM12: RBDr89lCRDc168S_Sensor	RBDr89lCRDc168S_Sensor	NarX = EF1a_RBDr89lCRDc168s NarL = EF1a_Narl-F.L.T.	EF1a	EF1a_RBDr89lCRDc168s		EF1a_Narl-F.L.T.	Fugene [3 µL/µg]	1.5x	SKOV-3	wildtype	wt	yes	1	0.000569624	0.0162602	0.3432	602.503	11685	16	0.0012	286	972	0.0738	8164	0	0		2	0.00017	995
257	SKOV-3_C5_C05_017.fcs	E_GS3_98_1_mCerulean_Plate_004	21:12:13	C	5	Control	12	MM12	MM12: RBDr89lCRDc168S_Sensor	RBDr89lCRDc168S_Sensor	NarX = EF1a_RBDr89lCRDc168s NarL = EF1a_Narl-F.L.T.	EF1a	EF1a_RBDr89lCRDc168s		EF1a_Narl-F.L.T.	Fugene [3 µL/µg]	1.5x	SKOV-3	wildtype	wt	yes	2	0.000329061	0.0190217	0.1806	548.835	11879	18	0.0014	129	973	0.0736	7457	1	8.42E−3%	175142	8	0.00067	1093
258	SKOV-3_C6_C06_018.fcs	E_GS3_98_1_mCerulean_Plate_004	21:13:22	C	6	Control	12	MM12	MM12: RBDr89lCRDc168S_Sensor	RBDr89lCRDc168S_Sensor	NarX = EF1a_RBDr89lCRDc168s NarL = EF1a_Narl-F.L.T.	EF1a	EF1a_RBDr89lCRDc168s		EF1a_Narl-F.L.T.	Fugene [3 µL/µg]	1.5x	SKOV-3	wildtype	wt	yes	3	0.00027124	0.0120787	0.16512	608.76	11528	11	0.00086	192	908	0.0712	8550	1	8.67E−3%	170766	4	0.00035	1195
259	SKOV-3_D1_D01_019.fcs	E_GS3_98_1_mCerulean_Plate_004	21:14:30	D	1	RAS Circuit	9	MM9	MM9: SRE_NarL-F.L.T.	SRE_NarL-F.L.T.	NarX = EF1a_RBDCRD-6xfL NarL = SRE_NarL-F.L.T	SRE	EF1a_RBDCRD-6xfL		SRE_NarL-F.L.T	Fugene [3 µL/µg]	1.5x	SKOV-3	wildtype	wt	yes	1	0.000806884	0.0239596	0.5092	631.069	8012	17	0.0019	268	714	0.0793	7958	0	0		1	0.00012	17696
260	SKOV-3_D2_D02_020.fcs	E_GS3_98_1_mCerulean_Plate_004	21:15:38	D	2	RAS Circuit	9	MM9	MM9: SRE_NarL-F.L.T.	SRE_NarL-F.L.T.	NarX = EF1a_RBDCRD-6xfL NarL = SRE_NarL-F.L.T	SRE	EF1a_RBDCRD-6xfL		SRE_NarL-F.L.T	Fugene [3 µL/µg]	1.5x	SKOV-3	wildtype	wt	yes	2	0.000434922	0.016129	0.2756	633.677	8884	13	0.0013	212	808	0.0806	7862	0	0		3	0.00034	1097
261	SKOV-3_D3_D03_021.fcs	E_GS3_98_1_mCerulean_Plate_004	21:16:46	D	3	RAS Circuit	9	MM9	MM9: SRE_NarL-F.L.T.	SRE_NarL-F.L.T.	NarX = EF1a_RBDCRD-6xfL NarL = SRE_NarL-F.L.T	SRE	EF1a_RBDCRD-6xfL		SRE_NarL-F.L.T	Fugene [3 µL/µg]	1.5x	SKOV-3	wildtype	wt	yes	3	0.000687519	0.0223048	0.4068	591.692	9653	20	0.0018	226	875	0.0807	7332	0	0		1	0.0001	1033
262	SKOV-3_D1_D01_028.fcs	E_GS3_98_1_mScarlet_Plate_006	04:11:49	A	4	MAPK Sensor	15	MM15	MM15: pFos_mScarlet	pFos_mScarlet	NarX = pFos_mScarlet NarL = 0	pFos	pFos_mScarlet		0	Fugene [3 µL/µg]	1.5x	SKOV-3	wildtype	wt	yes	1	0.000618305	0.0119734	0	258.513	14900	0	0		0	0		8	0.00054	296	672	0.0451	5732
263	SKOV-3_D2_D02_029.fcs	E_GS3_98_1_mScarlet_Plate_006	04:12:58	A	5	MAPK Sensor	15	MM15	MM15: pFos_mScarlet	pFos_mScarlet	NarX = pFos_mScarlet NarL = 0	pFos	pFos_mScarlet		0	Fugene [3 µL/µg]	1.5x	SKOV-3	wildtype	wt	yes	2	0.000326424	0.00633484	0	253.045	14538	0	0		0	0		4	0.00028	295	642	0.0442	5725
264	SKOV-3_D3_D03_030.fcs	E_GS3_98_1_mScarlet_Plate_006	04:14:06	A	6	MAPK Sensor	15	MM15	MM15: pFos_mScarlet	pFos_mScarlet	NarX = pFos_mScarlet NarL = 0	pFos	pFos_mScarlet		0	Fugene [3 µL/µg]	1.5x	SKOV-3	wildtype	wt	yes	3	0.000292265	0.00483871	0	218.432	14603	0	0		0	0		3	0.00021	304	634	0.0434	5033
265	SKOV-3_D4_D04_031.fcs	E_GS3_98_1_mScarlet_Plate_006	04:15:14	B	1	MAPK Sensor	16	MM16	MM16: PY2_mScarlet	PY2_mScarlet	NarX = PY2_mScarlet NarL = 0	PY2	PY2_mScarlet		0	Fugene [3 µL/µg]	1.5x	SKOV-3	wildtype	wt	yes	1	0.000827571	0.0168699	0	304.892	14432	0	0		0	0		12	0.00083	304	710	0.0492	6197
266	SKOV-3_D5_D05_032.fcs	E_GS3_98_1_mScarlet_Plate_006	04:16:22	B	2	MAPK Sensor	16	MM16	MM16: PY2_mScarlet	PY2_mScarlet	NarX = PY2_mScarlet NarL = 0	PY2	PY2_mScarlet		0	Fugene [3 µL/µg]	1.5x	SKOV-3	wildtype	wt	yes	2	0.000297969	0.0037702	0	308.689	14109	0	0		0	0		3	0.00021	438	786	0.0557	5542
267	SKOV-3_D6_D06_033.fcs	E_GS3_98_1_mScarlet_Plate_006	04:17:30	B	3	MAPK Sensor	16	MM16	MM16: PY2_mScarlet	PY2_mScarlet	NarX = PY2_mScarlet NarL = 0	PY2	PY2_mScarlet		0	Fugene [3 µL/µg]	1.5x	SKOV-3	wildtype	wt	yes	3	0.000438844	0.00787992	0	283.289	14157	0	0		0	0		6	0.00042	296	754	0.0533	5315
268	SKOV-3_D7_D07_034.fcs	E_GS3_98_1_mScarlet_Plate_006	04:18:39	B	4	MAPK Sensor	17	MM17	MM17: SRE_mScarlet	SRE_mScarlet	NarX = SRE_mScarlet NarL = 0	SRE	SRE_mScarlet		0	Fugene [3 µL/µg]	1.5x	SKOV-3	wildtype	wt	yes	1	0.000484929	0.00906801	0	210.092	16738	0	0		0	0		6	0.00036	283	664	0.0397	5292
269	SKOV-3_D8_D08_035.fcs	E_GS3_98_1_mScarlet_Plate_006	04:19:48	B	5	MAPK Sensor	17	MM17	MM17: SRE_mScarlet	SRE_mScarlet	NarX = SRE_mScarlet NarL = 0	SRE	SRE_mScarlet		0	Fugene [3 µL/µg]	1.5x	SKOV-3	wildtype	wt	yes	2	0.000416935	0.0078481	0	223.056	16301	0	0		0	0		5	0.00031	300	644	0.0395	5647
270	SKOV-3_D9_D09_036.fcs	E_GS3_98_1_mScarlet_Plate_006	04:20:56	B	6	MAPK Sensor	17	MM17	MM17: SRE_mScarlet	SRE_mScarlet	NarX = SRE_mScarlet NarL = 0	SRE	SRE_mScarlet		0	Fugene [3 µL/µg]	1.5x	SKOV-3	wildtype	wt	yes	3	0.000152912	0.00323529	0	218.688	17399	0	0		0	0		2	0.00011	304	591	0.034	6432
271	SW480_A1_A01_001.fcs	E_GS3_98_1_mCerulean_Plate_002	18:11:55	A	1	RAS Circuit	6	MM6	MM6: RAS Sensor_F.L.T.	RAS Sensor_F.L.T.	NarX = EF1a_RBDCRD-6xfL NarL = EF1a_Narl-F.L.T.	EF1a	EF1a_RBDCRD-6xfL		EF1a_Narl-F.L.T.	Fugene [3 µL/µg]	1.5x	SW480	mutated	KRAS G12V	no	1	0.00675347	0.116466	4.988	738.584	118385	715	0.0058	860	6179	0.0498	14831	1	8.45E−4%	287	52	0.00044	1044
272	SW480_A2_A02_002.fcs	E_GS3_98_1_mCerulean_Plate_002	18:13:03	A	2	RAS Circuit	6	MM6	MM6: RAS Sensor_F.L.T.	RAS Sensor_F.L.T.	NarX = EF1a_RBDCRD-6xfL NarL = EF1a_Narl-F.L.T.	EF1a	EF1a_RBDCRD-6xfL		EF1a_Narl-F.L.T.	Fugene [3 µL/µg]	1.5x	SW480	mutated	KRAS G12V	no	2	0.00593542	0.110108	5.1362	865.348	114857	737	0.0061	842	6724	0.0554	15620	2	1.74E−3%	319	55	0.00048	1031
273	SW480_A3_A03_003.fcs	E_GS3_98_1_mCerulean_Plate_002	18:14:12	A	3	RAS Circuit	6	MM6	MM6: RAS Sensor_F.L.T.	RAS Sensor_F.L.T.	NarX = EF1a_RBDCRD-6xfL NarL = EF1a_Narl-F.L.T.	EF1a	EF1a_RBDCRD-6xfL		EF1a_Narl-F.L.T.	Fugene [3 µL/µg]	1.5x	SW480	mutated	KRAS G12V	no	3	0.00612398	0.115732	5.408	883.086	120844	822	0.0064	845	7053	0.0553	15969	1	8.28E−4%	148230	38	0.00031	1046
274	SW480_A4_A04_004.fcs	E_GS3_98_1_mCerulean_Plate_002	18:15:20	A	4	RAS Circuit	10	MM10	MM10: PY2_NarL-F.L.T.	PY2_NarL-F.L.T.	NarX = EF1a_RBDCRD-6xfL NarL = PY2_NarL-F.L.T	PY2	EF1a_RBDCRD-6xfL		PY2_NarL-F.L.T	Fugene [3 µL/µg]	1.5x	SW480	mutated	KRAS G12V	no	1	0.00301292	0.0800712	2.5785	855.814	113524	543	0.0045	573	6751	0.0562	15228	1	8.81E−4%	162869	47	0.00041	1060
275	SW480_A5_A05_005.fcs	E_GS3_98_1_mCerulean_Plate_002	18:16:28	A	5	RAS Circuit	10	MM10	MM10: PY2_NarL-F.L.T.	PY2_NarL-F.L.T.	NarX = EF1a_RBDCRD-6xfL NarL = PY2_NarL-F.L.T	PY2	EF1a_RBDCRD-6xfL		PY2_NarL-F.L.T	Fugene [3 µL/µg]	1.5x	SW480	mutated	KRAS G12V	no	2	0.00265606	0.0692308	2.0988	790.192	64840	249	0.0036	583	3557	0.052	15196	0	0		24	0.00037	1053
276	SW480_A6_A06_006.fcs	E_GS3_98_1_mCerulean_Plate_002	18:17:36	A	6	RAS Circuit	10	MM10	MM10: PY2_NarL-F.L.T.	PY2_NarL-F.L.T.	NarX = EF1a_RBDCRD-6xfL NarL = PY2_NarL-F.L.T	PY2	EF1a_RBDCRD-6xfL		PY2_NarL-F.L.T	Fugene [3 µL/µg]	1.5x	SW480	mutated	KRAS G12V	no	3	0.00288429	0.0682819	1.9003	658.845	61667	202	0.0031	613	2923	0.0454	14512	3	4.86E−3%	106925	26	0.00042	1085
277	SW480_B4_B04_010.fcs	E_GS3_98_1_mCerulean_Plate_002	18:22:09	B	4	RAS Circuit	11	MM11	MM11: PY2_all_F.L.T.	PY2_all_F.L.T.	NarX = PY2_RBDCRD-6xfL NarL = PY2_NarL-F.L.T	PY2	PY2_RBDCRD-6xfL		PY2_NarL-F.L.T	Fugene [3 µL/µg]	1.5x	SW480	mutated	KRAS G12V	no	1	0.00618308	0.115546	3.168	512.366	127650	734	0.0055	576	6398	0.0476	10764	0	0		52	0.00041	1039
278	SW480_B5_B05_011.fcs	E_GS3_98_1_mCerulean_Plate_002	18:23:18	B	5	RAS Circuit	11	MM11	MM11: PY2_all_F.L.T.	PY2_all_F.L.T.	NarX = PY2_RBDCRD-6xfL NarL = PY2_NarL-F.L.T	PY2	PY2_RBDCRD-6xfL		PY2_NarL-F.L.T	Fugene [3 µL/µg]	1.5x	SW480	mutated	KRAS G12V	no	2	0.00481503	0.100897	2.475	514.015	64864	307	0.0045	550	3032	0.0446	11525	2	3.08E−3%	78524	23	0.00035	1051
279	SW480_B6_B06_012.fcs	E_GS3_98_1_mCerulean_Plate_002	18:24:26	B	6	RAS Circuit	11	MM11	MM11: PY2_all_F.L.T.	PY2_all_F.L.T.	NarX = PY2_RBDCRD-6xfL NarL = PY2_NarL-F.L.T	PY2	PY2_RBDCRD-6xfL		PY2_NarL-F.L.T	Fugene [3 µL/µg]	1.5x	SW480	mutated	KRAS G12V	no	3	0.00448579	0.0966184	1.908	425.344	63398	267	0.004	477	2735	0.0414	10274	1	1.58E−3%	336	30	0.00047	1052
280	SW480_C1_C01_013.fcs	E_GS3_98_1_mCerulean_Plate_002	18:25:34	C	1	RAS Circuit	8	MM8	MM8: pFos_NarL-F.L.T.	pFos_NarL-F.L.T.	NarX = EF1a_RBDCRD-6xfL NarL = pFos_NarL-F.L.T	pFos	EF1a_RBDCRD-6xfL		pFos_NarL-F.L.T	Fugene [3 µL/µg]	1.5x	SW480	mutated	KRAS G12V	no	1	0.00138488	0.0368217	1.0849	783.391	61911	127	0.0019	571	3390	0.0516	15182	0	0		19	0.00031	1043
281	SW480_C2_C02_014.fcs	E_GS3_98_1_mCerulean_Plate_002	18:26:43	C	2	RAS Circuit	8	MM8	MM8: pFos_NarL-F.L.T.	pFos_NarL-F.L.T.	NarX = EF1a_RBDCRD-6xfL NarL = pFos_NarL-F.L.T	pFos	EF1a_RBDCRD-6xfL		pFos_NarL-F.L.T	Fugene [3 µL/µg]	1.5x	SW480	mutated	KRAS G12V	no	2	0.0012047	0.0368189	1.315	1091.56	70365	186	0.0025	526	5125	0.0679	16076	3	4.26E−3%	155108	27	0.00038	1079
282	SW480_C3_C03_015.fcs	E_GS3_98_1_mCerulean_Plate_002	18:27:51	C	3	RAS Circuit	8	MM8	MM8: pFos_NarL-F.L.T.	pFos_NarL-F.L.T.	NarX = EF1a_RBDCRD-6xfL NarL = pFos_NarL-F.L.T	pFos	EF1a_RBDCRD-6xfL		pFos_NarL-F.L.T	Fugene [3 µL/µg]	1.5x	SW480	mutated	KRAS G12V	no	3	0.00117284	0.0362069	1.0584	902.422	80130	182	0.0021	504	4923	0.058	15559	1	1.25E−3%	155377	33	0.00041	1047
283	SW480_C4_C04_016.fcs	E_GS3_98_1_mCerulean_Plate_002	18:28:59	C	4	Control	12	MM12	MM12: RBDr89lCRDc168S_Sensor	RBDr89lCRDc168S_Sensor	NarX = EF1a_RBDr89lCRDc168s NarL = EF1a_Narl-F.L.T.	EF1a	EF1a_RBDr89lCRDc168s		EF1a_Narl-F.L.T.	Fugene [3 µL/µg]	1.5x	SW480	mutated	KRAS G12V	no	1	0.000186965	0.0133106	0.20202	1080.53	75410	64	0.00078	259	4836	0.0586	18439	10	0.00013	172582	39	0.00052	1148
284	SW480_C5_C05_017.fcs	E_GS3_98_1_mCerulean_Plate_002	18:30:08	C	5	Control	12	MM12	MM12: RBDr89lCRDc168S_Sensor	RBDr89lCRDc168S_Sensor	NarX = EF1a_RBDr89lCRDc168s NarL = EF1a_Narl-F.L.T.	EF1a	EF1a_RBDr89lCRDc168s		EF1a_Narl-F.L.T.	Fugene [3 µL/µg]	1.5x	SW480	mutated	KRAS G12V	no	2	0.000156488	0.0148077	0.14168	905.372	44567	36	0.00077	184	2444	0.052	17411	2	4.49E−3%	153302	16	0.00036	1063
285	SW480_C6_C06_018.fcs	E_GS3_98_1_mCerulean_Plate_002	18:31:16	C	6	Control	12	MM12	MM12: RBDr89lCRDc168S_Sensor	RBDr89lCRDc168S_Sensor	NarX = EF1a_RBDr89lCRDc168s NarL = EF1a_Narl-F.L.T.	EF1a	EF1a_RBDr89lCRDc168s		EF1a_Narl-F.L.T.	Fugene [3 µL/µg]	1.5x	SW480	mutated	KRAS G12V	no	3	0.000139985	0.0113821	0.1176	840.09	54184	32	0.00056	210	2789	0.0492	17075	8	0.00015	147476	27	0.0005	1089
286	SW480_D1_D01_019.fcs	E_GS3_98_1_mCerulean_Plate_002	18:32:24	D	1	RAS Circuit	9	MM9	MM9: SRE_NarL-F.L.T.	SRE_NarL-F.L.T.	NarX = EF1a_RBDCRD-6xfL NarL = SRE_NarL-F.L.T	SRE	EF1a_RBDCRD-6xfL		SRE_NarL-F.L.T	Fugene [3 µL/µg]	1.5x	SW480	mutated	KRAS G12V	no	1	0.00412474	0.0793319	2.7702	671.606	50749	202	0.0038	729	2542	0.0479	14021	0	0		16	0.00032	1040
287	SW480_D2_D02_020.fcs	E_GS3_98_1_mCerulean_Plate_002	18:33:32	D	2	RAS Circuit	9	MM9	MM9: SRE_NarL-F.L.T.	SRE_NarL-F.L.T.	NarX = EF1a_RBDCRD-6xfL NarL = SRE_NarL-F.L.T	SRE	EF1a_RBDCRD-6xfL		SRE_NarL-F.L.T	Fugene [3 µL/µg]	1.5x	SW480	mutated	KRAS G12V	no	2	0.00482741	0.0962963	3.6868	763.722	65887	362	0.0052	709	3762	0.054	14143	2	3.04E−3%	271	25	0.00038	1048
288	SW480_D3_D03_021.fcs	E_GS3_98_1_mCerulean_Plate_002	18:34:40	D	3	RAS Circuit	9	MM9	MM9: SRE_NarL-F.L.T.	SRE_NarL-F.L.T.	NarX = EF1a_RBDCRD-6xfL NarL = SRE_NarL-F.L.T	SRE	EF1a_RBDCRD-6xfL		SRE_NarL-F.L.T	Fugene [3 µL/µg]	1.5x	SW480	mutated	KRAS G12V	no	3	0.00483065	0.0844278	3.6	745.241	68821	326	0.0045	800	3864	0.0533	13982	1	1.45E−3%	316	28	0.00041	1046
289	SW480_A1_A01_001.fcs	E_GS3_98_1_mScarlet_Plate_006	03:40:23	A	4	MAPK Sensor	15	MM15	MM15: pFos_mScarlet	pFos_mScarlet	NarX = pFos_mScarlet NarL = 0	pFos	pFos_mScarlet		0	Fugene [3 µL/µg]	1.5x	SW480	mutated	KRAS G12V	no	1	0.000512973	0.0199637	0	911.354	131522	0	0		0	0		144	0.0011	425	7243	0.0551	16540
290	SW480_A2_A02_002.fcs	E_GS3_98_1_mScarlet_Plate_006	03:41:30	A	5	MAPK Sensor	15	MM15	MM15: pFos_mScarlet	pFos_mScarlet	NarX = pFos_mScarlet NarL = 0	pFos	pFos_mScarlet		0	Fugene [3 µL/µg]	1.5x	SW480	mutated	KRAS G12V	no	2	0.000588284	0.0223048	0	864.889	132444	0	0		0	0		155	0.0012	424	7122	0.0538	16076
291	SW480_A3_A03_003.fcs	E_GS3_98_1_mScarlet_Plate_006	03:42:38	A	6	MAPK Sensor	15	MM15	MM15: pFos_mScarlet	pFos_mScarlet	NarX = pFos_mScarlet NarL = 0	pFos	pFos_mScarlet		0	Fugene [3 µL/µg]	1.5x	SW480	mutated	KRAS G12V	no	3	0.000532959	0.0205021	0	757.582	139933	0	0		0	0		137	0.00098	412	6693	0.0478	15849
292	SW480_A4_A04_004.fcs	E_GS3_98_1_mScarlet_Plate_006	03:43:47	B	1	MAPK Sensor	16	MM16	MM16: PY2_mScarlet	PY2_mScarlet	NarX = PY2_mScarlet NarL = 0	PY2	PY2_mScarlet		0	Fugene [3 µL/µg]	1.5x	SW480	mutated	KRAS G12V	no	1	0.00175186	0.0552699	0	1443.27	49353	0	0		0	0		213	0.0043	588	3839	0.0778	18551
293	SW480_A5_A05_005.fcs	E_GS3_98_1_mScarlet_Plate_006	03:44:54	B	2	MAPK Sensor	16	MM16	MM16: PY2_mScarlet	PY2_mScarlet	NarX = PY2_mScarlet NarL = 0	PY2	PY2_mScarlet		0	Fugene [3 µL/µg]	1.5x	SW480	mutated	KRAS G12V	no	2	0.00213718	0.0598958	0	1177.34	128198	0	0		0	0		589	0.0046	547	9851	0.0768	15330
294	SW480_A6_A06_006.fcs	E_GS3_98_1_mScarlet_Plate_006	03:46:02	B	3	MAPK Sensor	16	MM16	MM16: PY2_mScarlet	PY2_mScarlet	NarX = PY2_mScarlet NarL = 0	PY2	PY2_mScarlet		0	Fugene [3 µL/µg]	1.5x	SW480	mutated	KRAS G12V	no	3	0.00191447	0.056686	0	1063.37	136658	0	0		0	0		536	0.0039	522	9401	0.0688	15456
295	SW480_A7_A07_007.fcs	E_GS3_98_1_mScarlet_Plate_006	03:47:10	B	4	MAPK Sensor	17	MM17	MM17: SRE_mScarlet	SRE_mScarlet	NarX = SRE_mScarlet NarL = 0	SRE	SRE_mScarlet		0	Fugene [3 µL/µg]	1.5x	SW480	mutated	KRAS G12V	no	1	0.00252907	0.0766667	0	1105.86	95625	0	0		0	0		441	0.0046	608	5737	0.06	18431
296	SW480_A8_A08_008.fcs	E_GS3_98_1_mScarlet_Plate_006	03:48:18	B	5	MAPK Sensor	17	MM17	MM17: SRE_mScarlet	SRE_mScarlet	NarX = SRE_mScarlet NarL = 0	SRE	SRE_mScarlet		0	Fugene [3 µL/µg]	1.5x	SW480	mutated	KRAS G12V	no	2	0.00267464	0.0738007	0	870.398	136965	0	0		0	0		552	0.004	582	7419	0.0542	16059
297	SW480_A9_A09_009.fcs	E_GS3_98_1_mScarlet_Plate_006	03:49:27	B	6	MAPK Sensor	17	MM17	MM17: SRE_mScarlet	SRE_mScarlet	NarX = SRE_mScarlet NarL = 0	SRE	SRE_mScarlet		0	Fugene [3 µL/µg]	1.5x	SW480	mutated	KRAS G12V	no	3	0.00295508	0.0799257	0	931.278	144893	0	0		0	0		626	0.0043	640	7792	0.0538	17310
298	SW620_A1_A01_001.fcs	E_GS3_98_1_mCerulean_Plate_001	15:58:36	A	1	RAS Circuit	6	MM6	MM6: RAS Sensor_F.L.T.	RAS Sensor_F.L.T.	NarX = EF1a_RBDCRD-6xfL NarL = EF1a_Narl-F.L.T.	EF1a	EF1a_RBDCRD-6xfL		EF1a_Narl-F.L.T.	Lipofectamine 3000 [2 µL/µg]	1.5x	SW620	mutated	KRAS G12V	no	1	0.00235377	0.0668421	6.1595	2616.87	121843	1982	0.0127	485	29685	0.19	13773	0	0		40	0.00033	1045
299	SW620_A2_A02_002.fcs	E_GS3_98_1_mCerulean_Plate_001	15:59:45	A	2	RAS Circuit	6	MM6	MM6: RAS Sensor_F.L.T.	RAS Sensor_F.L.T.	NarX = EF1a_RBDCRD-6xfL NarL = EF1a_Narl-F.L.T.	EF1a	EF1a_RBDCRD-6xfL		EF1a_Narl-F.L.T.	Lipofectamine 3000 [2 µL/µg]	1.5x	SW620	mutated	KRAS G12V	no	2	0.00241454	0.0626374	6.0648	2511.78	141289	2129	0.0114	532	33891	0.182	13801	2	1.42E−3%	78725	53	0.00038	1040
300	SW620_A3_A03_003.fcs	E_GS3_98_1_mCerulean_Plate_001	16:00:53	A	3	RAS Circuit	6	MM6	MM6: RAS Sensor_F.L.T.	RAS Sensor_F.L.T.	NarX = EF1a_RBDCRD-6xfL NarL = EF1a_Narl-F.L.T.	EF1a	EF1a_RBDCRD-6xfL		EF1a_Narl-F.L.T.	Lipofectamine 3000 [2 µL/µg]	1.5x	SW620	mutated	KRAS G12V	no	3	0.00237484	0.0631016	5.9944	2524.13	119741	1895	0.0118	508	30060	0.187	13498	2	1.67E−3%	87007	46	0.00038	1058
301	SW620_A4_A04_004.fcs	E_GS3_98_1_mCerulean_Plate_001	16:02:01	A	4	RAS Circuit	10	MM10	MM10: PY2_NarL-F.L.T.	PY2_NarL-F.L.T.	NarX = EF1a_RBDCRD-6xfL NarL = PY2_NarL-F.L.T	PY2	EF1a_RBDCRD-6xfL		PY2_NarL-F.L.T	Lipofectamine 3000 [2 µL/µg]	1.5x	SW620	mutated	KRAS G12V	no	1	0.00245628	0.0732323	7.105	2892.58	129305	2598	0.0145	490	35618	0.198	14609	3	2.32E−3%	49132	42	0.00032	1049
302	SW620_A5_A05_005.fcs	E_GS3_98_1_mCerulean_Plate_001	16:03:09	A	5	RAS Circuit	10	MM10	MM10: PY2_NarL-F.L.T.	PY2_NarL-F.L.T.	NarX = EF1a_RBDCRD-6xfL NarL = PY2_NarL-F.L.T	PY2	EF1a_RBDCRD-6xfL		PY2_NarL-F.L.T	Lipofectamine 3000 [2 µL/µg]	1.5x	SW620	mutated	KRAS G12V	no	2	0.00239788	0.0712042	6.6368	2767.78	147851	2583	0.0136	488	36135	0.191	14491	1	6.76E−4%	359	48	0.00032	1021
303	SW620_A6_A06_006.fcs	E_GS3_98_1_mCerulean_Plate_001	16:04:17	A	6	RAS Circuit	10	MM10	MM10: PY2_NarL-F.L.T.	PY2_NarL-F.L.T.	NarX = EF1a_RBDCRD-6xfL NarL = PY2_NarL-F.L.T	PY2	EF1a_RBDCRD-6xfL		PY2_NarL-F.L.T	Lipofectamine 3000 [2 µL/µg]	1.5x	SW620	mutated	KRAS G12V	no	3	0.00216665	0.0622549	6.2357	2878.03	141796	2441	0.0127	491	39111	0.204	14108	2	1.41E−3%	314	42	0.0003	1043
304	SW620_B4_B04_010.fcs	E_GS3_98_1_mCerulean_Plate_001	16:08:50	B	4	RAS Circuit	11	MM11	MM11: PY2_all_F.L.T.	PY2_all_F.L.T.	NarX = PY2_RBDCRD-6xfL NarL = PY2_NarL-F.L.T	PY2	PY2_RBDCRD-6xfL		PY2_NarL-F.L.T	Lipofectamine 3000 [2 µL/µg]	1.5x	SW620	mutated	KRAS G12V	no	1	0.00315783	0.0783784	6.8585	2171.9	117951	2311	0.0145	473	29501	0.185	11740	2	1.70E−3%	304	48	0.00041	1043
305	SW620_B5_B05_011.fcs	E_GS3_98_1_mCerulean_Plate_001	16:09:59	B	5	RAS Circuit	11	MM11	MM11: PY2_all_F.L.T.	PY2_all_F.L.T.	NarX = PY2_RBDCRD-6xfL NarL = PY2_NarL-F.L.T	PY2	PY2_RBDCRD-6xfL		PY2_NarL-F.L.T	Lipofectamine 3000 [2 µL/µg]	1.5x	SW620	mutated	KRAS G12V	no	2	0.00306004	0.079235	6.67	2179.71	138656	2557	0.0145	460	32308	0.183	11911	0	0		46	0.00033	1063
306	SW620_B6_B06_012.fcs	E_GS3_98_1_mCerulean_Plate_001	16:11:07	B	6	RAS Circuit	11	MM11	MM11: PY2_all_F.L.T.	PY2_all_F.L.T.	NarX = PY2_RBDCRD-6xfL NarL = PY2_NarL-F.L.T	PY2	PY2_RBDCRD-6xfL		PY2_NarL-F.L.T	Lipofectamine 3000 [2 µL/µg]	1.5x	SW620	mutated	KRAS G12V	no	3	0.00291799	0.0722826	6.2244	2133.11	144073	2443	0.0133	468	33836	0.184	11593	0	0		46	0.00032	1033
307	SW620_C1_C01_013.fcs	E_GS3_98_1_mCerulean_Plate_001	16:12:15	C	1	RAS Circuit	8	MM8	MM8: pFos_NarL-F.L.T.	pFos_NarL-F.L.T.	NarX = EF1a_RBDCRD-6xfL NarL = pFos_NarL-F.L.T	pFos	EF1a_RBDCRD-6xfL		pFos_NarL-F.L.T	Lipofectamine 3000 [2 µL/µg]	1.5x	SW620	mutated	KRAS G12V	no	1	0.000252859	0.0125714	0.6534	2584.05	135323	372	0.0022	297	29791	0.175	14766	5	3.69E−3%	34312	52	0.00038	1049
308	SW620_C2_C02_014.fcs	E_GS3_98_1_mCerulean_Plate_001	16:13:24	C	2	RAS Circuit	8	MM8	MM8: pFos_NarL-F.L.T.	pFos_NarL-F.L.T.	NarX = EF1a_RBDCRD-6xfL NarL = pFos_NarL-F.L.T	pFos	EF1a_RBDCRD-6xfL		pFos_NarL-F.L.T	Lipofectamine 3000 [2 µL/µg]	1.5x	SW620	mutated	KRAS G12V	no	2	0.000253958	0.0123596	0.682	2685.49	134496	375	0.0022	310	30273	0.178	15087	5	3.72E−3%	31143	39	0.00029	1046
309	SW620_C3_C03_015.fcs	E_GS3_98_1_mCerulean_Plate_001	16:14:32	C	3	RAS Circuit	8	MM8	MM8: pFos_NarL-F.L.T.	pFos_NarL-F.L.T.	NarX = EF1a_RBDCRD-6xfL NarL = pFos_NarL-F.L.T	pFos	EF1a_RBDCRD-6xfL		pFos_NarL-F.L.T	Lipofectamine 3000 [2 µL/µg]	1.5x	SW620	mutated	KRAS G12V	no	3	0.000245627	0.0128205	0.7175	2921.1	116970	379	0.0025	287	29623	0.195	14980	1	8.55E−4%	152589	43	0.00037	1036
310	SW620_C4_C04_016.fcs	E_GS3_98_1_mCerulean_Plate_001	16:15:40	C	4	Control	12	MM12	MM12: RBDr89lCRDc168S_Sensor	RBDr89lCRDc168S_Sensor	NarX = EF1a_RBDr89lCRDc168s NarL = EF1a_Narl-F.L.T.	EF1a	EF1a_RBDr89lCRDc168s		EF1a_Narl-F.L.T.	Lipofectamine 3000 [2 µL/µg]	1.5x	SW620	mutated	KRAS G12V	no	1	0.00019259	0.0144279	0.6467	3357.91	128591	492	0.0029	223	33738	0.201	16706	8	6.22E−3%	131218	51	0.0004	1070
311	SW620_C5_C05_017.fcs	E_GS3_98_1_mCerulean_Plate_001	16:16:48	C	5	Control	12	MM12	MM12: RBDr89lCRDc168S_Sensor	RBDr89lCRDc168S_Sensor	NarX = EF1a_RBDr89lCRDc168s NarL = EF1a_Narl-F.L.T.	EF1a	EF1a_RBDr89lCRDc168s		EF1a_Narl-F.L.T.	Lipofectamine 3000 [2 µL/µg]	1.5x	SW620	mutated	KRAS G12V	no	2	0.000461911	0.0181818	1.6264	3521.02	114940	578	0.0038	428	31748	0.209	16847	11	9.57E−3%	150112	52	0.00045	1087
312	SW620_C6_C06_018.fcs	E_GS3_98_1_mCerulean_Plate_001	16:17:57	C	6	Control	12	MM12	MM12: RBDr89lCRDc168S_Sensor	RBDr89lCRDc168S_Sensor	NarX = EF1a_RBDr89lCRDc168s NarL = EF1a_Narl-F.L.T.	EF1a	EF1a_RBDr89lCRDc168s		EF1a_Narl-F.L.T.	Lipofectamine 3000 [2 µL/µg]	1.5x	SW620	mutated	KRAS G12V	no	3	0.00015787	0.0112245	0.4862	3079.75	124144	346	0.0022	221	31500	0.196	15713	12	9.67E−3%	151584	52	0.00042	1090
313	SW620_D1_D01_019.fcs	E_GS3_98_1_mCerulean_Plate_001	16:19:05	D	1	RAS Circuit	9	MM9	MM9: SRE_NarL-F.L.T.	SRE_NarL-F.L.T.	NarX = EF1a_RBDCRD-6xfL NarL = SRE_NarL-F.L.T	SRE	EF1a_RBDCRD-6xfL		SRE_NarL-F.L.T	Lipofectamine 3000 [2 µL/µg]	1.5x	SW620	mutated	KRAS G12V	no	1	0.000953438	0.0353488	2.9336	3076.86	114086	1157	0.0076	386	32715	0.215	14311	3	2.63E−3%	167088	45	0.00039	1051
314	SW620_D2_D02_020.fcs	E_GS3_98_1_mCerulean_Plate_001	16:20:13	D	2	RAS Circuit	9	MM9	MM9: SRE_NarL-F.L.T.	SRE_NarL-F.L.T.	NarX = EF1a_RBDCRD-6xfL NarL = SRE_NarL-F.L.T	SRE	EF1a_RBDCRD-6xfL		SRE_NarL-F.L.T	Lipofectamine 3000 [2 µL/µg]	1.5x	SW620	mutated	KRAS G12V	no	2	0.000900125	0.0334928	2.779	3087.35	128780	1195	0.007	397	35596	0.209	14772	3	2.33E−3%	103784	45	0.00035	1044
315	SW620_D3_D03_021.fcs	E_GS3_98_1_mCerulean_Plate_001	16:21:22	D	3	RAS Circuit	9	MM9	MM9: SRE_NarL-F.L.T.	SRE_NarL-F.L.T.	NarX = EF1a_RBDCRD-6xfL NarL = SRE_NarL-F.L.T	SRE	EF1a_RBDCRD-6xfL		SRE_NarL-F.L.T	Lipofectamine 3000 [2 µL/µg]	1.5x	SW620	mutated	KRAS G12V	no	3	0.000963518	0.0327189	3.0246	3139.12	112438	1123	0.0071	426	34313	0.217	14466	4	3.56E−3%	122524	47	0.00042	1057
316	SW620_A1_A01_001.fcs	E_GS3_98_1_mScarlet_Plate_005	23:36:57	A	4	MAPK Sensor	15	MM15	MM15: pFos_mScarlet	pFos_mScarlet	NarX = pFos_mScarlet NarL = 0	pFos	pFos_mScarlet		0	Lipofectamine 3000 [2 µL/µg]	1.5x	SW620	mutated	KRAS G12V	no	1	0.000205765	0.00705882	0	2006.17	139238	0	0		0	0		168	0.0012	344	23617	0.17	11801
317	SW620_A2_A02_002.fcs	E_GS3_98_1_mScarlet_Plate_005	23:38:07	A	5	MAPK Sensor	15	MM15	MM15: pFos_mScarlet	pFos_mScarlet	NarX = pFos_mScarlet NarL = 0	pFos	pFos_mScarlet		0	Lipofectamine 3000 [2 µL/µg]	1.5x	SW620	mutated	KRAS G12V	no	2	0.000186833	0.00658683	0	2007.67	175520	0	0		0	0		185	0.0011	341	29257	0.167	12022
318	SW620_A3_A03_003.fcs	E_GS3_98_1_mScarlet_Plate_005	23:39:15	A	6	MAPK Sensor	15	MM15	MM15: pFos_mScarlet	pFos_mScarlet	NarX = pFos_mScarlet NarL = 0	pFos	pFos_mScarlet		0	Lipofectamine 3000 [2 µL/µg]	1.5x	SW620	mutated	KRAS G12V	no	3	0.000162741	0.00568047	0	2046.93	178621	0	0		0	0		171	0.00096	347	30191	0.169	12112
319	SW620_A4_A04_004.fcs	E_GS3_98_1_mScarlet_Plate_005	23:40:23	B	1	MAPK Sensor	16	MM16	MM16: PY2_mScarlet	PY2_mScarlet	NarX = PY2_mScarlet NarL = 0	PY2	PY2_mScarlet		0	Lipofectamine 3000 [2 µL/µg]	1.5x	SW620	mutated	KRAS G12V	no	1	0.000184648	0.00592593	0	1954.85	179355	0	0		0	0		173	0.00096	376	29028	0.162	12067
320	SW620_A5_A05_005.fcs	E_GS3_98_1_mScarlet_Plate_005	23:41:30	B	2	MAPK Sensor	16	MM16	MM16: PY2_mScarlet	PY2_mScarlet	NarX = PY2_mScarlet NarL = 0	PY2	PY2_mScarlet		0	Lipofectamine 3000 [2 µL/µg]	1.5x	SW620	mutated	KRAS G12V	no	2	0.000175876	0.00617284	0	1978.67	180194	0	0		0	0		182	0.001	348	29167	0.162	12214
321	SW620_A6_A06_006.fcs	E_GS3_98_1_mScarlet_Plate_005	23:42:38	B	3	MAPK Sensor	16	MM16	MM16: PY2_mScarlet	PY2_mScarlet	NarX = PY2_mScarlet NarL = 0	PY2	PY2_mScarlet		0	Lipofectamine 3000 [2 µL/µg]	1.5x	SW620	mutated	KRAS G12V	no	3	0.000174481	0.00573248	0	1913.67	175203	0	0		0	0		158	0.0009	371	27486	0.157	12189
322	SW620_A7_A07_007.fcs	E_GS3_98_1_mScarlet_Plate_005	23:43:46	B	4	MAPK Sensor	17	MM17	MM17: SRE_mScarlet	SRE_mScarlet	NarX = SRE_mScarlet NarL = 0	SRE	SRE_mScarlet		0	Lipofectamine 3000 [2 µL/µg]	1.5x	SW620	mutated	KRAS G12V	no	1	0.000396086	0.0125	0	2266.18	194309	0	0		0	0		427	0.0022	408	34160	0.176	12876
323	SW620_A8_A08_008.fcs	E_GS3_98_1_mScarlet_Plate_005	23:44:53	B	5	MAPK Sensor	17	MM17	MM17: SRE_mScarlet	SRE_mScarlet	NarX = SRE_mScarlet NarL = 0	SRE	SRE_mScarlet		0	Lipofectamine 3000 [2 µL/µg]	1.5x	SW620	mutated	KRAS G12V	no	2	0.000414872	0.0136364	0	2337.1	185433	0	0		0	0		447	0.0024	404	32716	0.176	13279
324	SW620_A9_A09_009.fcs	E_GS3_98_1_mScarlet_Plate_005	23:46:02	B	6	MAPK Sensor	17	MM17	MM17: SRE_mScarlet	SRE_mScarlet	NarX = SRE_mScarlet NarL = 0	SRE	SRE_mScarlet		0	Lipofectamine 3000 [2 µL/µg]	1.5x	SW620	mutated	KRAS G12V	no	3	0.000434875	0.0132075	0	2057.14	181833	0	0		0	0		384	0.0021	426	28966	0.159	12938

## Sheet: Sheet2
																	SynZip						RBDr89lCRD168s
												Average MM14 (SZ)	Average MM12 (r89l)			A549-F	0.0171077	1	0.0159428	1	0.0159428		0.000633119	1	0.000580295	1	0.000580295
			6	MM6	EF1a_RBDCRD-6xfL	EF1a_Narl-F.L.T.			A549-F	KRAS G12S	Fugene [3.5 µL/µg]	0.0159428	0.000580295	no		A549-F	0.0169951	2		1	0.00791304		0.000454503	2		1	0.000761459
			7	MM7	EF1a_RBDr89lCRDc168s	EF1a_Narl-F.L.T.			A549-V	KRAS G12S	Viafect [8 µL/µg]	0.00791304	0.000761459	no		A549-F	0.0137254	3		1	0.0185718		0.000653262	3		1	0.000330577
			8	MM8	NF1 & EF1a_RBDCRD-6xfL	EF1a_Narl-F.L.T.			AsPC-1-F	KRAS G12D	Fugene [3.5 µL/µg]	0.0185718	0.000330577	no		A549-V	0.00870152	1	0.00791304	1	0.0127492		0.000711547	1	0.000761459	1	0.000237529
			9	MM9	EF1a_RBDCRD-6xfL	PY2_NarL-F.L.T			AsPC-1-V	KRAS G12D	Viafect [8 µL/µg]	0.0127492	0.000237529	no		A549-V	0.00757272	2		1	0.0241721		0.000740057	2		1	0.000138819
			10	MM10	EF1a_RBDCRD-3xrL	PY2_NarL-F.L.T			HCT-116_KRAS-k.o.	wt	Fugene [3 µL/µg]	0.0241721	0.000138819	yes		A549-V	0.00746489	3		1	0.0316569		0.000832772	3		1	0.000123055
			11	MM11	SRE_RBDCRD-6xfL	Ef1a_NarL-F.L.T.			HCT-116_KRAS-wt	KRAS G13D	Fugene [3 µL/µg]	0.0316569	0.000123055	no		AsPC-1-F	0.020794	1	0.0185718	1	0.0169469		0.000765022	1	0.000330577	1	0.00241715
			12	MM12	PY2_RBDCRD-6xfL	PY2_NarL-F.L.T			HEK-293	wt	Lipofectamine 2000 [2 µL/µg]	0.0169469	0.00241715	yes		AsPC-1-F	0.0190264	2		1	0.0506297		0.000106277	2		1	0.001842
			13	MM13	pFos_mScarlet	0			HEK-g12d	KRAS G12D	Lipofectamine 2000 [2 µL/µg]	0.0506297	0.001842	no		AsPC-1-F	0.015895	3		1	0.0160892		0.00012043	3		1	0.00206887
			14	MM14	PY2_mScarlet	0			HEK-wt	wt	Lipofectamine 2000 [2 µL/µg]	0.0160892	0.00206887	yes		AsPC-1-V	0.00990974	1	0.0127492	1	0.0047768		9.23649e-05	1	0.000237529	1	3.87579e-05
			15	MM15	SRE_mScarlet	0			HeLa-F	wt	Fugene [3 µL/µg]	0.0047768	3.87579e-05	yes		AsPC-1-V	0.0122944	2		1	0.00399514		0.000311068	2		1	0.00024402
									HeLa-L2	wt	Lipofectamine 2000 [3 µL/µg]	0.00399514	0.00024402	yes		AsPC-1-V	0.0160435	3		1	0.0341594		0.000309154	3		1	8.77416e-05
									HepG2-F	NRAS Q61L	Fugene [3.5 µL/µg]	0.0341594	8.77416e-05	no		HCT-116_KRAS-k.o.	0.0260985	1	0.0241721	1	0.0301649		0.000137737	1	0.000138819	1	1.57843e-05
									HepG2-V	NRAS Q61L	Viafect [8 µL/µg]	0.0301649	1.57843e-05	no		HCT-116_KRAS-k.o.	0.0231123	2		1	0.00703474		0.000124783	2		1	0.000138502
									HT-29	wt	Lipofectamine 3000 [2 µL/µg]	0.00703474	0.000138502	yes		HCT-116_KRAS-k.o.	0.0233056	3		1	0.0215524		0.000153938	3		1	3.09645e-05
									Igrov-1	wt	Fugene [3 µL/µg]	0.0215524	3.09645e-05	yes		HCT-116_KRAS-wt	0.0318708	1	0.0316569	1	0.0111138		0.000118838	1	0.000123055	1	8.66201e-05
									K562	BCR-ABL	Lipofectamine 2000 [3 µL/µg]	0.0111138	8.66201e-05	no		HCT-116_KRAS-wt	0.0316335	2		1	0.0199546		0.000122344	2		1	2.46201e-05
									LoVo	KRAS G13D	Fugene [3 µL/µg]	0.0199546	2.46201e-05	no		HCT-116_KRAS-wt	0.0314663	3		1	0.00208252		0.000127984	3		1	0.000167983
									MCF-7	wt	Fugene [3 µL/µg]	0.00208252	0.000167983	yes		HEK-293	0.0176091	1	0.0169469	1	0.00111775		0.00237076	1	0.00241715	1	0.000389975
									SKOV-3	wt	Fugene [3 µL/µg]	0.00111775	0.000389975	yes		HEK-293	0.0171473	2		1	0.0212486		0.00217623	2		1	0.000161146
									SW480	KRAS G12V	Fugene [3 µL/µg]	0.0212486	0.000161146	no		HEK-293	0.0160843	3		1	0.0110072		0.00270446	3		1	0.000270791
									SW620	KRAS G12V	Lipofectamine 3000 [2 µL/µg]	0.0110072	0.000270791	no		HEK-g12d	0.0509278	1	0.0506297				0.0022157	1	0.001842
																HEK-g12d	0.0498078	2					0.0016242	2
																HEK-g12d	0.0511534	3					0.00168609	3
																HEK-wt	0.0162502	1	0.0160892				0.00215872	1	0.00206887
																HEK-wt	0.0166411	2					0.00200315	2
																HEK-wt	0.0153763	3					0.00204475	3
																HeLa-F	0.0047547	1	0.0047768				3.36276e-05	1	3.87579e-05
																HeLa-F	0.00485988	2					4.06595e-05	2
																HeLa-F	0.00471582	3					4.19867e-05	3
																HeLa-L2	0.00373523	1	0.00399514				0.000205505	1	0.00024402
																HeLa-L2	0.00335451	2					0.000394366	2
																HeLa-L2	0.00489567	3					0.000132189	3
																HepG2-F	0.0334734	1	0.0341594				5.24225e-05	1	8.77416e-05
																HepG2-F	0.0342164	2					0.000133708	2
																HepG2-F	0.0347885	3					7.70946e-05	3
																HepG2-V	0.0308221	1	0.0301649				1.52487e-05	1	1.57843e-05
																HepG2-V	0.0303713	2					2.59327e-05	2
																HepG2-V	0.0293014	3					6.17147e-06	3
																HT-29	0.00766789	1	0.00703474				5.52336e-05	1	0.000138502
																HT-29	0.00788561	2					0.000117451	2
																HT-29	0.00555074	3					0.000242822	3
																Igrov-1	0.0201583	1	0.0215524				3.63153e-05	1	3.09645e-05
																Igrov-1	0.0216645	2					3.0626e-05	2
																Igrov-1	0.0228345	3					2.59521e-05	3
																K562	0.0108868	1	0.0111138				8.87711e-05	1	8.66201e-05
																K562	0.0109148	2					0.000118691	2
																K562	0.0115398	3					5.2398e-05	3
																LoVo	0.0204933	1	0.0199546				3.75805e-05	1	2.46201e-05
																LoVo	0.0210102	2					2.60501e-05	2
																LoVo	0.0183603	3					1.02297e-05	3
																MCF-7	0.00242259	1	0.00208252				0.000267256	1	0.000167983
																MCF-7	0.00182351	2					5.41361e-05	2
																MCF-7	0.00200148	3					0.000182556	3
																SKOV-3	0.000884248	1	0.00111775				0.000569624	1	0.000389975
																SKOV-3	0.00169067	2					0.000329061	2
																SKOV-3	0.000778347	3					0.00027124	3
																SW480	0.0227901	1	0.0212486				0.000186965	1	0.000161146
																SW480	0.0212943	2					0.000156488	2
																SW480	0.0196613	3					0.000139985	3
																SW620	0.0116071	1	0.0110072				0.00019259	1	0.000270791
																SW620	0.0108451	2					0.000461911	2
																SW620	0.0105695	3					0.00015787	3
