# Supplementary material for: Synthetic gene circuits that selectively target RAS-driven cancers
Source: eLife. 2026 Feb 24;14:RP104320. doi: 10.7554/eLife.104320 (PMC12931925; doi:10.7554/eLife.104320)
Supplement: Figure 8—source data 1. [file elife-104320-fig8-data1.xlsx]

## Sheet: Sheet 1
Figure 8 - Source Data 1 | file with brightfield data from figure 8 used to create the figures. R scripts used for plotting are available on github (see data availability statement)
sample_id	Well	Plate	Cell_Line	Transfection	GCV	MM	Circuit	Identifier	0	1	2	3	4	5	6	7	8	9	10	11	12	13	14	15	16	17	18	19	21	22	23	24	25	26	27	28	29	30	31	32	33	34	35	36	37	38	39	40	41
P2_Y (A11)	A11	P2	HCT-116	F_0.5x	DMSO	MM13	Control	P2HCT-116DMSOMM13	2.3891499999999999	2.4181499999999998	2.5760000000000001	2.6534499999999999	3.1368999999999998	3.5392000000000001	3.7271999999999998	4.25725	4.5867500000000003	4.8178999999999998	4.7115499999999999	5.9066999999999998	6.0742500000000001	6.4112499999999999	6.4188999999999998	7.1417999999999999	7.5218499999999997	7.3216999999999999	7.7316000000000003	7.7061999999999999	8.5749499999999994	9.1152499999999996	9.5742999999999991	10.28135	11.0603	11.8781	12.549300000000001	12.85825	13.584199999999999	14.228149999999999	14.7606	15.79975	16.052600000000002	16.872599999999998	17.2271	18.703150000000001	19.629549999999998	21.021350000000002	22.486599999999999	23.568349999999999	25.473199999999999
P2_Y (A4)	A4	P2	HCT-116	F_0.5x	Triton	MM13	Control	P2HCT-116TritonMM13	3.9110999999999998	3.4708000000000001	3.5947499999999999	4.0422500000000001	4.0672499999999996	4.7334500000000004	5.1041499999999997	5.3590999999999998	5.9968000000000004	6.53085	6.8163999999999998	7.5045000000000002	7.6853499999999997	8.7914999999999992	9.3186999999999998	9.7119499999999999	9.8151499999999992	9.9749999999999996	10.117050000000001	10.225250000000001	10.638350000000001	11.473699999999999	12.2041	12.9978	13.129300000000001	14.31545	14.949249999999999	16.261500000000002	17.470749999999999	17.856000000000002	18.252199999999998	19.324850000000001	20.37415	21.062349999999999	22.198550000000001	23.94135	24.927099999999999	26.306750000000001	28.017749999999999	29.79025	32.110750000000003
P2_Y (A8)	A8	P2	HCT-116	F_0.5x	pos.Ctrl	MM13	Control	P2HCT-116pos.CtrlMM13	2.85955	2.8325	3.3230499999999998	3.56325	3.9734500000000001	4.48095	5.1451500000000001	5.3604000000000003	5.9142000000000001	6.2839499999999999	6.6558999999999999	7.2020499999999998	7.1611500000000001	7.5606999999999998	8.0609500000000001	8.3675999999999995	8.1768000000000001	8.9230999999999998	9.3002000000000002	9.6440000000000001	10.0036	10.24305	10.49695	11.521850000000001	12.160349999999999	13.292149999999999	14.020799999999999	14.6684	15.27365	15.8378	16.828749999999999	18.038250000000001	18.945250000000001	19.989650000000001	20.701650000000001	21.697649999999999	23.335650000000001	24.083850000000002	25.36975	26.6813	28.1462
P2_Y (B11)	B11	P2	HCT-116	F_0.5x	200	MM11	EF1a_RAS-Sensor	P2HCT-116200MM11	5.3532500000000001	4.8656499999999996	5.1239999999999997	5.8673500000000001	5.8579499999999998	6.6364000000000001	7.4302000000000001	7.1911500000000004	8.0899000000000001	8.5896000000000008	8.8603000000000005	9.5663499999999999	10.005599999999999	11.4056	11.511200000000001	11.994249999999999	12.6229	12.3263	12.647550000000001	12.977399999999999	13.6432	14.356400000000001	15.5084	17.056950000000001	17.630500000000001	18.338550000000001	19.1904	20.260950000000001	21.38015	22.745349999999998	23.742999999999999	25.306999999999999	26.386900000000001	27.064	27.978950000000001	29.0487	30.830549999999999	32.526649999999997	34.400500000000001	37.503349999999998	39.561300000000003
P2_Y (B4)	B4	P2	HCT-116	F_0.5x	0	MM11	EF1a_RAS-Sensor	P2HCT-1160MM11	1.1790499999999999	1.3633	1.3633999999999999	1.3136000000000001	1.5972999999999999	2.2637499999999999	2.5164	2.6789499999999999	2.6766999999999999	2.7214499999999999	2.7473999999999998	3.1812999999999998	3.3049499999999998	3.1537500000000001	3.5347	3.7457500000000001	4.1317500000000003	4.1564500000000004	4.1293499999999996	4.4667000000000003	4.7578500000000004	4.9318499999999998	4.9299499999999998	5.33155	5.9946000000000002	5.95845	6.5313499999999998	6.7441000000000004	7.2125500000000002	7.5378999999999996	8.4444999999999997	8.3867499999999993	9.0386500000000005	8.7012999999999998	9.5196500000000004	10.188599999999999	11.0022	12.03745	12.511850000000001	13.930149999999999	14.90915
P2_Y (B8)	B8	P2	HCT-116	F_0.5x	50	MM11	EF1a_RAS-Sensor	P2HCT-11650MM11	3.3912499999999999	3.1757499999999999	3.5942500000000002	3.7963	4.5617000000000001	4.5265000000000004	5.2567500000000003	6.1166999999999998	6.141	6.8363500000000004	7.5778999999999996	7.6356000000000002	7.7004999999999999	8.3487500000000008	8.7771000000000008	8.9925499999999996	9.1057000000000006	9.1110000000000007	9.5713500000000007	9.4774499999999993	10.168850000000001	11.3047	12.09695	13.15925	13.744149999999999	14.5845	15.7462	16.482050000000001	17.34535	17.923850000000002	18.87275	19.830249999999999	20.420349999999999	21.211749999999999	22.259899999999998	24.0822	25.548999999999999	26.895700000000001	28.164950000000001	30.1358	31.033249999999999
P2_Y (C11)	C11	P2	HCT-116	F_0.5x	200	MM11	EF1a_RAS-Sensor	P2HCT-116200MM11	4.3315000000000001	3.3038500000000002	3.7566999999999999	3.66465	3.9194	4.6334	5.4534500000000001	5.9279500000000001	6.0911	6.1494	6.8516500000000002	7.3154500000000002	8.2407000000000004	8.4635999999999996	8.51	8.4648000000000003	8.8338000000000001	9.3035499999999995	10.19985	10.45025	10.83465	11.087350000000001	11.8256	12.686299999999999	13.5373	14.0303	14.370100000000001	15.1472	15.385300000000001	16.294650000000001	17.6328	17.847950000000001	19.1812	20.267749999999999	21.331700000000001	22.059100000000001	23.670249999999999	25.066549999999999	26.533149999999999	28.059349999999998	29.232600000000001
P2_Y (C4)	C4	P2	HCT-116	F_0.5x	0	MM11	EF1a_RAS-Sensor	P2HCT-1160MM11	6.0994999999999999	4.05985	3.9533	4.0884	4.2660499999999999	4.5842000000000001	5.1555	5.5856500000000002	6.1142500000000002	6.6033999999999997	6.9657499999999999	7.4009499999999999	8.0971499999999992	8.3494499999999992	8.8049999999999997	9.0687999999999995	8.7398000000000007	9.8369999999999997	9.4033999999999995	10.374549999999999	10.7014	11.4139	12.599399999999999	13.21865	14.2433	15.60745	15.79275	16.952500000000001	17.127500000000001	18.286899999999999	18.9514	20.071300000000001	20.862950000000001	21.9682	22.957899999999999	24.653749999999999	25.398599999999998	27.292950000000001	28.289650000000002	30.525749999999999	31.285150000000002
P2_Y (C8)	C8	P2	HCT-116	F_0.5x	50	MM11	EF1a_RAS-Sensor	P2HCT-11650MM11	4.7902500000000003	4.1150500000000001	3.9009999999999998	4.3192500000000003	5.00535	5.4547999999999996	5.9988000000000001	6.5575000000000001	7.3802500000000002	7.8105000000000002	8.1921999999999997	8.8046500000000005	9.2584	9.5281500000000001	10.37875	10.760999999999999	10.6896	11.07855	11.19965	11.28275	11.4939	11.6761	12.5238	13.227349999999999	14.18305	14.754899999999999	16.267299999999999	16.99755	17.760300000000001	18.47925	19.455300000000001	20.8888	21.727699999999999	22.690149999999999	23.52365	25.036300000000001	27.241849999999999	28.473649999999999	30.210799999999999	31.473299999999998	33.074599999999997
P2_Y (D11)	D11	P2	HCT-116	F_0.5x	200	MM11	EF1a_RAS-Sensor	P2HCT-116200MM11	4.7836499999999997	3.4489000000000001	3.7063999999999999	4.0442	4.7518500000000001	5.8482000000000003	6.1287000000000003	6.4209500000000004	6.9533500000000004	7.0304500000000001	7.6324500000000004	8.0808	9.0835000000000008	8.7044499999999996	9.9414499999999997	10.203900000000001	10.9411	11.28955	11.35995	11.45195	11.77985	12.775550000000001	13.33165	14.073	15.066700000000001	15.982950000000001	16.863299999999999	18.1266	18.6677	19.818300000000001	20.4071	20.895050000000001	21.353850000000001	22.515350000000002	23.094149999999999	24.273	25.277000000000001	26.695399999999999	28.243549999999999	29.6082	31.707550000000001
P2_Y (D4)	D4	P2	HCT-116	F_0.5x	0	MM11	EF1a_RAS-Sensor	P2HCT-1160MM11	5.8750499999999999	5.6814499999999999	5.8307500000000001	6.6954500000000001	7.1311	8.2528000000000006	9.0283499999999997	9.4368999999999996	10.23	11.030150000000001	11.10365	12.25855	12.953200000000001	13.773999999999999	14.45805	14.9512	14.9724	15.860150000000001	15.793900000000001	16.396350000000002	16.9406	18.411899999999999	19.1889	20.323899999999998	22.055700000000002	23.026150000000001	24.4969	25.5458	26.824000000000002	28.054300000000001	28.95515	30.460799999999999	32.148800000000001	33.118250000000003	34.518999999999998	36.02525	37.323749999999997	39.519150000000003	40.870350000000002	43.252049999999997	45.38165
P2_Y (D8)	D8	P2	HCT-116	F_0.5x	50	MM11	EF1a_RAS-Sensor	P2HCT-11650MM11	8.9695	8.4822500000000005	8.3695500000000003	8.5383499999999994	10.045199999999999	11.413600000000001	12.828799999999999	13.285550000000001	14.8141	15.16935	15.61605	16.801449999999999	17.670500000000001	17.980250000000002	19.196650000000002	19.7898	20.347100000000001	20.91095	21.791049999999998	22.012499999999999	22.434200000000001	25.356999999999999	26.489899999999999	28.664999999999999	30.51765	31.86185	33.582149999999999	35.09825	36.804850000000002	37.6663	39.1494	40.174950000000003	42.17	43.702950000000001	46.100700000000003	47.979799999999997	51.1569	53.722149999999999	56.388300000000001	58.963700000000003	61.90175
P2_Y (E11)	E11	P2	HCT-116	F_0.5x	200	MM12	PY2_NarL-F.L.T	P2HCT-116200MM12	8.0848999999999993	7.2411500000000002	7.7453500000000002	8.1180000000000003	9.5388500000000001	10.78375	11.097899999999999	12.601900000000001	12.467000000000001	13.001200000000001	13.546200000000001	13.941700000000001	14.92775	15.9549	15.738200000000001	16.600149999999999	16.870200000000001	17.651250000000001	17.532299999999999	18.093699999999998	18.238299999999999	19.7087	20.3306	21.638850000000001	23.389500000000002	24.45975	25.58935	27.0215	28.260750000000002	29.454550000000001	30.961500000000001	32.037750000000003	33.169600000000003	35.005699999999997	36.708500000000001	37.962049999999998	39.819099999999999	41.091250000000002	43.601550000000003	45.752549999999999	47.380800000000001
P2_Y (E4)	E4	P2	HCT-116	F_0.5x	0	MM12	PY2_NarL-F.L.T	P2HCT-1160MM12	6.1976000000000004	6.6775500000000001	6.8331999999999997	6.7952000000000004	8.0061	8.5167999999999999	9.8370999999999995	10.407400000000001	11.74715	12.16555	12.5654	13.64485	13.82095	14.59755	15.351150000000001	15.28065	15.4887	16.847249999999999	16.8782	17.87135	18.828700000000001	20.278600000000001	21.010999999999999	22.8691	23.953199999999999	25.343299999999999	26.3506	27.59375	28.778300000000002	30.940850000000001	31.64855	33.251550000000002	33.430100000000003	35.3264	37.094700000000003	38.86815	40.236800000000002	41.970999999999997	43.552999999999997	46.47345	48.145150000000001
P2_Y (E8)	E8	P2	HCT-116	F_0.5x	50	MM12	PY2_NarL-F.L.T	P2HCT-11650MM12	6.3844500000000002	7.0989000000000004	7.3196500000000002	7.8936999999999999	8.6931499999999993	10.28565	10.41675	10.727449999999999	10.975250000000001	11.9636	12.743550000000001	12.87485	14.171200000000001	14.762499999999999	15.35345	15.968500000000001	16.789100000000001	16.486249999999998	16.860600000000002	17.362449999999999	17.542750000000002	18.704499999999999	20.243500000000001	22.075900000000001	23.005749999999999	24.138349999999999	26.021650000000001	26.663499999999999	28.446200000000001	28.80855	29.345849999999999	29.95645	30.750299999999999	31.905200000000001	34.130499999999998	35.565199999999997	37.074800000000003	40.009399999999999	41.298499999999997	43.946150000000003	46.038600000000002
P2_Y (F11)	F11	P2	HCT-116	F_0.5x	200	MM12	PY2_NarL-F.L.T	P2HCT-116200MM12	3.2018499999999999	3.0911499999999998	2.8364500000000001	3.2714500000000002	3.3211499999999998	4.1540499999999998	4.7083000000000004	5.0561499999999997	5.6029999999999998	5.3903999999999996	6.298	6.6417000000000002	7.5476000000000001	7.9284499999999998	8.3587500000000006	8.4787499999999998	8.3036499999999993	8.9297000000000004	8.9739000000000004	9.3781499999999998	10.0174	10.218299999999999	11.048450000000001	11.687200000000001	12.518000000000001	12.869450000000001	13.9246	14.37345	15.32775	15.949199999999999	17.121600000000001	17.553599999999999	18.340800000000002	19.164850000000001	19.742899999999999	20.386050000000001	21.602599999999999	22.15795	23.641999999999999	24.667300000000001	26.311699999999998
P2_Y (F4)	F4	P2	HCT-116	F_0.5x	0	MM12	PY2_NarL-F.L.T	P2HCT-1160MM12	5.9592999999999998	4.9996	4.9941500000000003	5.4267500000000002	5.9061500000000002	6.5686	7.2949999999999999	8.3597000000000001	8.6661999999999999	9.2021499999999996	9.5919500000000006	10.52125	10.862299999999999	11.801349999999999	11.8482	11.9093	12.1601	12.138	12.9398	13.452199999999999	14.36505	15.766450000000001	16.77225	18.458549999999999	19.3399	21.536750000000001	22.0837	22.383050000000001	23.178100000000001	23.582450000000001	25.224450000000001	26.566749999999999	27.652049999999999	28.693549999999998	30.79785	32.645249999999997	34.336100000000002	36.127549999999999	38.071750000000002	39.846499999999999	42.282800000000002
P2_Y (F8)	F8	P2	HCT-116	F_0.5x	50	MM12	PY2_NarL-F.L.T	P2HCT-11650MM12	6.1024000000000003	4.6257000000000001	5.3679500000000004	5.5237499999999997	5.6213499999999996	6.5366	7.5953999999999997	8.0065000000000008	8.8861500000000007	8.6917500000000008	8.8782999999999994	9.0049499999999991	9.7988	11.008050000000001	10.957100000000001	11.72345	12.134650000000001	13.02575	12.84965	13.13815	13.79195	14.5351	15.652100000000001	15.99785	16.902799999999999	17.52215	18.339449999999999	19.879349999999999	20.934999999999999	22.203900000000001	22.463750000000001	23.5106	24.812999999999999	25.658000000000001	26.892600000000002	27.930199999999999	29.012699999999999	29.834900000000001	31.247450000000001	32.877549999999999	35.537550000000003
P2_Y (G11)	G11	P2	HCT-116	F_0.5x	200	MM12	PY2_NarL-F.L.T	P2HCT-116200MM12	2.754	2.6184500000000002	2.6881499999999998	2.7265000000000001	3.2122000000000002	3.6436999999999999	4.17875	4.4658499999999997	4.78925	4.9744000000000002	5.4325999999999999	5.7246499999999996	5.7938499999999999	5.7198000000000002	6.5197500000000002	7.0440500000000004	7.0723500000000001	7.3740500000000004	7.5945499999999999	7.5857999999999999	7.4787999999999997	8.0410500000000003	8.6903000000000006	9.0172000000000008	9.6321999999999992	10.217750000000001	10.86965	11.36515	11.694699999999999	12.204050000000001	12.86495	12.79715	14.116899999999999	14.7362	14.485300000000001	15.8421	16.59975	17.799050000000001	18.912050000000001	19.624600000000001	20.767700000000001
P2_Y (G4)	G4	P2	HCT-116	F_0.5x	0	MM12	PY2_NarL-F.L.T	P2HCT-1160MM12	2.4733499999999999	2.34985	2.60575	2.75075	3.2021000000000002	3.9754999999999998	4.2897999999999996	4.7855999999999996	4.8727	5.6135000000000002	5.7056500000000003	6.4622000000000002	6.6091499999999996	7.2648999999999999	7.6509	8.0247499999999992	8.1249000000000002	8.5310000000000006	8.4695999999999998	8.6780500000000007	9.0157000000000007	9.8825500000000002	10.917	11.053850000000001	11.9832	12.3531	12.96255	13.874549999999999	13.93215	14.6135	15.47885	15.83525	17.15015	17.988299999999999	19.135999999999999	19.875299999999999	21.139150000000001	22.573550000000001	23.002700000000001	24.997250000000001	26.227399999999999
P2_Y (G8)	G8	P2	HCT-116	F_0.5x	50	MM12	PY2_NarL-F.L.T	P2HCT-11650MM12	3.4003000000000001	3.2864	3.8116500000000002	3.8763000000000001	4.3418000000000001	4.9942000000000002	5.4793000000000003	5.8708999999999998	6.2244000000000002	6.2999000000000001	6.64445	7.2698499999999999	7.5168999999999997	8.2858999999999998	8.9824000000000002	9.0225000000000009	9.5169499999999996	10.100949999999999	10.06995	10.28135	10.136100000000001	11.236000000000001	11.3871	12.147500000000001	12.8757	13.2729	14.38345	15.2524	15.8255	16.667349999999999	17.167100000000001	18.665649999999999	19.403500000000001	20.08005	21.054200000000002	21.961300000000001	23.269549999999999	25.003399999999999	26.607500000000002	29.033049999999999	30.090199999999999
P3_Y (B11)	B11	P3	HCT-116	F_0.5x	200	MM14	EF1a_HSVTK	P3HCT-116200MM14	2.7414000000000001	2.5224000000000002	2.7907500000000001	2.9943499999999998	3.3006000000000002	3.8161999999999998	4.1031000000000004	4.6494999999999997	5.3619500000000002	5.2803000000000004	5.8983999999999996	5.8346499999999999	6.6660500000000003	7.2689000000000004	7.9930000000000003	7.8874500000000003	7.6454500000000003	8.1216500000000007	8.4036500000000007		9.5945	11.058299999999999	11.0661	11.658799999999999	12.52525	13.412599999999999	14.33465	14.57325	15.021699999999999	15.3293	15.970800000000001	16.464400000000001	17.172899999999998	18.531700000000001	18.922799999999999	19.810749999999999	21.373249999999999	22.7209	24.096450000000001	25.310549999999999	27.3215
P3_Y (B4)	B4	P3	HCT-116	F_0.5x	0	MM14	EF1a_HSVTK	P3HCT-1160MM14	2.2783500000000001	2.5141	2.4308999999999998	2.4704999999999999	2.9462999999999999	3.5516999999999999	3.8029500000000001	4.1991500000000004	5.1226000000000003	4.7379499999999997	5.2955500000000004	5.3258000000000001	5.9615499999999999	6.5513000000000003	6.5850999999999997	6.6498499999999998	6.6778000000000004	6.7776500000000004	6.9889000000000001		8.4707500000000007	9.5050000000000008	9.9480000000000004	11.261900000000001	12.1608	12.895949999999999	13.3147	13.5223	14.477	14.78575	15.260899999999999	15.714700000000001	16.9678	18.09235	19.581499999999998	20.745000000000001	22.7272	23.854800000000001	25.313700000000001	26.20345	27.675049999999999
P3_Y (B8)	B8	P3	HCT-116	F_0.5x	50	MM14	EF1a_HSVTK	P3HCT-11650MM14	0.69105000000000005	0.71750000000000003	0.86199999999999999	1.0118	1.2137	1.4194	1.6472	1.61595	1.8063499999999999	2.0397500000000002	2.1900499999999998	2.15035	2.3551500000000001	2.6204000000000001	2.9139499999999998	3.1353	3.1845500000000002	3.3131499999999998	3.6333000000000002		3.88645	4.4445499999999996	4.6099500000000004	4.8243499999999999	5.2147500000000004	5.6557500000000003	6.0659000000000001	6.2717999999999998	6.3158000000000003	6.6094999999999997	6.8689499999999999	7.0281000000000002	7.1737000000000002	7.5223500000000003	8.0227500000000003	7.9783999999999997	8.1488499999999995	8.7747499999999992	9.1073500000000003	9.3103999999999996	10.04125
P3_Y (C11)	C11	P3	HCT-116	F_0.5x	200	MM14	EF1a_HSVTK	P3HCT-116200MM14	4.2780500000000004	4.3156999999999996	4.6679500000000003	4.9187500000000002	5.4060499999999996	6.0789	6.8481500000000004	7.1612499999999999	7.4524999999999997	7.71685	8.6386500000000002	9.2450500000000009	9.4799500000000005	10.0304	10.923550000000001	11.450950000000001	11.844250000000001	11.661199999999999	12.268599999999999		14.270849999999999	14.769299999999999	15.663349999999999	16.254349999999999	17.364699999999999	18.86815	19.473549999999999	20.606249999999999	21.149149999999999	22.139099999999999	23.162500000000001	24.620249999999999	25.31795	26.864850000000001	28.7684	29.796399999999998	31.091750000000001	32.667850000000001	34.6218	36.555050000000001	38.612699999999997
P3_Y (C4)	C4	P3	HCT-116	F_0.5x	0	MM14	EF1a_HSVTK	P3HCT-1160MM14	2.911	3.0784500000000001	3.2442500000000001	3.1377000000000002	3.7043499999999998	3.9958	5.1571999999999996	5.3973000000000004	5.899	6.4721500000000001	6.8520000000000003	7.101	7.5618499999999997	7.9698000000000002	8.3650000000000002	8.4128500000000006	9.02745	9.01145	9.3992500000000003		10.845649999999999	11.7745	13.4596	14.018599999999999	14.716950000000001	15.47575	16.501850000000001	17.214400000000001	17.7805	18.723099999999999	19.5108	20.189800000000002	21.025749999999999	22.218250000000001	23.203399999999998	24.25975	26.042300000000001	26.917649999999998	28.545999999999999	29.816849999999999	30.891749999999998
P3_Y (C8)	C8	P3	HCT-116	F_0.5x	50	MM14	EF1a_HSVTK	P3HCT-11650MM14	3.1013999999999999	3.0999500000000002	3.7038000000000002	4.1577500000000001	4.2104499999999998	4.4663000000000004	5.1348500000000001	5.4402499999999998	5.93065	6.2690000000000001	6.7521000000000004	7.5433500000000002	8.3669499999999992	8.0993999999999993	9.0403000000000002	9.3391000000000002	9.7177500000000006	10.10905	10.3149		10.93905	12.144299999999999	12.5085	13.04335	14.1707	15.122199999999999	16.029699999999998	16.989450000000001	18.20495	19.113350000000001	19.677199999999999	20.715900000000001	21.186900000000001	22.564499999999999	23.4437	25.25825	26.352350000000001	27.938300000000002	29.675850000000001	32.1023	33.418349999999997
P3_Y (D11)	D11	P3	HCT-116	F_0.5x	200	MM14	EF1a_HSVTK	P3HCT-116200MM14	6.0513500000000002	5.8246500000000001	5.8975499999999998	5.9571500000000004	6.6424500000000002	7.0864000000000003	7.69	8.4850999999999992	9.2927999999999997	9.5985499999999995	10.0641	10.53125	11.541449999999999	12.245100000000001	12.458600000000001	12.83225	13.183299999999999	13.9979	14.646699999999999		16.109349999999999	16.996549999999999	18.135899999999999	19.425350000000002	20.182649999999999	21.114249999999998	22.850300000000001	23.76895	24.790400000000002	26.0776	27.108699999999999	28.748049999999999	30.357299999999999	31.284849999999999	32.938800000000001	34.990349999999999	36.317300000000003	38.7288	40.6813	42.9514	45.91375
P3_Y (D4)	D4	P3	HCT-116	F_0.5x	0	MM14	EF1a_HSVTK	P3HCT-1160MM14	2.79095	2.8808500000000001	3.4085999999999999	3.8692500000000001	4.0446	4.62155	5.1313000000000004	5.5053000000000001	5.92605	6.2510000000000003	6.7953999999999999	7.5362	8.0944500000000001	8.4532500000000006	8.8076000000000008	9.4861500000000003	9.5246999999999993	9.7345000000000006	10.21425		10.342700000000001	11.694000000000001	12.1347	12.76995	13.464600000000001	14.11355	14.811500000000001	15.39845	15.827500000000001	16.246200000000002	16.997299999999999	18.36495	19.120049999999999	20.11035	21.4954	22.487749999999998	23.504000000000001	24.610499999999998	26.0364	27.378050000000002	28.464449999999999
P3_Y (D8)	D8	P3	HCT-116	F_0.5x	50	MM14	EF1a_HSVTK	P3HCT-11650MM14	2.8280500000000002	3.3957999999999999	3.3932500000000001	4.2037500000000003	4.0111999999999997	5.3305499999999997	6.4570499999999997	6.5355999999999996	6.6255499999999996	7.2549000000000001	7.8833000000000002	8.2108000000000008	8.7501999999999995	9.5489999999999995	10.015549999999999	10.02285	10.500400000000001	11.2666	12.064399999999999		13.324299999999999	14.103149999999999	15.36145	16.438549999999999	17.46275	18.1553	18.748799999999999	19.699649999999998	20.3565	21.3262	22.42625	23.693149999999999	25.041550000000001	26.456050000000001	28.071000000000002	29.097149999999999	30.477799999999998	31.146850000000001	32.475099999999998	33.957700000000003	36.0578
P3_Y (E11)	E11	P3	HCT-116	F_0.5x	200	MM10	GFP	P3HCT-116200MM10	4.5600500000000004	4.3620000000000001	5.0613999999999999	5.2909499999999996	6.2095500000000001	6.8556499999999998	7.0370499999999998	7.8130499999999996	8.5579999999999998	8.9310500000000008	9.6857500000000005	9.8484999999999996	10.800750000000001	11.17855	11.970700000000001	12.158799999999999	12.53975	12.8718	13.21285		14.432399999999999	15.860200000000001	16.54655	17.821149999999999	18.686150000000001	19.752749999999999	20.663900000000002	22.47805	23.450800000000001	24.4468	25.282050000000002	26.114650000000001	27.43825	27.901949999999999	29.613700000000001	31.50395	32.50235	34.209000000000003	35.989199999999997	37.908499999999997	40.186149999999998
P3_Y (E4)	E4	P3	HCT-116	F_0.5x	0	MM10	GFP	P3HCT-1160MM10	4.1052999999999997	4.4882	4.1399499999999998	5.4923999999999999	5.9385500000000002	6.7314499999999997	7.6061500000000004	7.7756499999999997	8.3246000000000002	8.7538999999999998	9.4886999999999997	9.6053999999999995	10.423	11.14715	11.929	11.8093	12.7196	12.799049999999999	13.341699999999999		14.54805	15.740399999999999	16.402249999999999	17.362449999999999	18.178349999999998	18.875599999999999	19.798549999999999	21.075299999999999	21.520949999999999	22.849250000000001	23.67	24.988800000000001	25.756350000000001	27.044350000000001	28.041049999999998	29.5398	31.07835	33.056750000000001	35.485849999999999	37.266599999999997	38.999650000000003
P3_Y (E8)	E8	P3	HCT-116	F_0.5x	50	MM10	GFP	P3HCT-11650MM10	3.1063499999999999	3.8372000000000002	3.3488500000000001	3.8767999999999998	4.0614499999999998	4.5219500000000004	4.9991500000000002	5.6272500000000001	5.9191000000000003	6.0603999999999996	6.3928500000000001	6.7988499999999998	6.7957999999999998	7.4728000000000003	7.9771000000000001	8.0646000000000004	8.2590500000000002	8.7327499999999993	9.3768999999999991		10.500249999999999	11.808149999999999	12.691750000000001	13.648849999999999	14.63805	15.0098	15.9945	16.58775	17.258800000000001	17.82075	18.56945	19.804099999999998	20.224399999999999	21.449549999999999	22.486499999999999	23.365100000000002	24.370200000000001	26.02515	27.501000000000001	28.828800000000001	30.013549999999999
P3_Y (F11)	F11	P3	HCT-116	F_0.5x	200	MM10	GFP	P3HCT-116200MM10	4.64595	4.4781000000000004	4.4008000000000003	5.0481499999999997	5.31975	5.80335	6.2670000000000003	6.4248000000000003	7.0823499999999999	7.5346000000000002	7.8304999999999998	8.6104000000000003	9.2974999999999994	9.8014500000000009	10.1698	11.05495	11.276999999999999	10.7646	11.785600000000001		13.139749999999999	13.443949999999999	14.45655	15.414350000000001	16.361149999999999	16.894200000000001	17.9116	18.6859	19.693349999999999	20.25845	20.8537	21.89695	22.8368	23.597149999999999	25.338200000000001	26.14	27.897600000000001	29.218350000000001	30.78595	32.664850000000001	34.134650000000001
P3_Y (F4)	F4	P3	HCT-116	F_0.5x	0	MM10	GFP	P3HCT-1160MM10	5.0671499999999998	5.2751000000000001	5.5287499999999996	5.9976000000000003	6.2180999999999997	6.84795	7.4038000000000004	7.9452999999999996	8.7207000000000008	8.8642000000000003	9.3572500000000005	9.8889999999999993	10.8241	11.374750000000001	11.025700000000001	12.239800000000001	12.280849999999999	12.6717	13.008649999999999		14.54365	15.6492	16.466650000000001	18.05875	19.171099999999999	19.649899999999999	21.117599999999999	22.060500000000001	23.454899999999999	24.273099999999999	24.816749999999999	26.310749999999999	26.66845	27.772649999999999	29.25515	30.971800000000002	32.915100000000002	35.321199999999997	37.1021	39.863349999999997	41.502450000000003
P3_Y (F8)	F8	P3	HCT-116	F_0.5x	50	MM10	GFP	P3HCT-11650MM10	5.0526	5.1401000000000003	5.58535	5.74655	6.4695	7.0702999999999996	7.6935500000000001	7.7133500000000002	7.8977000000000004	8.7514500000000002	9.3138500000000004	9.9192	10.50095	10.676	11.3545	11.987550000000001	11.8889	12.46045	13.5806		14.7783	15.5002	16.970400000000001	18.058399999999999	18.851700000000001	19.613900000000001	20.689399999999999	21.563800000000001	22.766649999999998	23.440049999999999	24.13345	25.262899999999998	26.500150000000001	27.882899999999999	29.370550000000001	31.234400000000001	32.578400000000002	34.572699999999998	36.745199999999997	39.097850000000001	41.076599999999999
P3_Y (G11)	G11	P3	HCT-116	F_0.5x	200	MM10	GFP	P3HCT-116200MM10	2.4035000000000002	2.5295000000000001	2.6433	2.9376500000000001	3.3477000000000001	3.67395	3.8978000000000002	4.55525	4.60745	4.8564999999999996	5.1939500000000001	5.7444499999999996	6.3023999999999996	6.8995499999999996	6.9363999999999999	7.3883000000000001	7.5750500000000001	8.0981000000000005	8.0500000000000007		8.9238	9.7561499999999999	10.4026	10.882099999999999	11.433299999999999	12.32375	13.02455	13.6183	14.430199999999999	15.1051	15.905900000000001	16.39265	16.8521	17.5672	18.743500000000001	19.231200000000001	20.31165	21.831050000000001	22.78265	24.2044	25.857099999999999
P3_Y (G4)	G4	P3	HCT-116	F_0.5x	0	MM10	GFP	P3HCT-1160MM10	4.5353000000000003	4.5112500000000004	4.9577	5.2080000000000002	5.6528999999999998	6.4476500000000003	7.2298	8.2453500000000002	8.7887000000000004	8.8422499999999999	9.7371499999999997	10.273099999999999	10.889950000000001	11.8764	11.9411	12.90305	13.2575	13.434950000000001	14.125450000000001		15.297599999999999	16.443549999999998	17.124700000000001	18.272349999999999	19.607849999999999	20.448149999999998	21.379100000000001	22.5533	23.797899999999998	24.6127	25.612400000000001	26.442049999999998	27.375299999999999	28.709700000000002	30.329049999999999	32.13935	34.108150000000002	35.9773	37.502749999999999	39.749000000000002	41.71
P3_Y (G8)	G8	P3	HCT-116	F_0.5x	50	MM10	GFP	P3HCT-11650MM10	3.968	4.0311500000000002	4.1443500000000002	4.34145	4.6558000000000002	5.4269499999999997	5.58575	6.1665999999999999	6.5242000000000004	6.7575000000000003	7.0705499999999999	7.3262	7.8591499999999996	8.3030000000000008	8.6550499999999992	8.9461999999999993	9.41845	9.1811000000000007	9.8348999999999993		10.7036	12.04655	12.65925	13.889200000000001	14.40695	15.82615	16.347799999999999	17.142499999999998	17.602799999999998	18.39085	19.739350000000002	20.823399999999999	21.290050000000001	22.405850000000001	23.6069	24.798400000000001	26.344999999999999	27.913499999999999	29.565200000000001	31.673999999999999	33.293599999999998
P4_Y (A11)	A11	P4	HCT-116	F_1x	DMSO	MM13	Control	P4HCT-116DMSOMM13	1.4162999999999999	1.5983000000000001	1.7117	2.0945	2.3837000000000002	2.5672999999999999	2.593	3.0491999999999999	3.5085999999999999	3.6766999999999999	4.1833999999999998	4.7027999999999999	4.6905000000000001	4.9123999999999999	5.0799000000000003	5.8175999999999997	6.1131000000000002	6.1361999999999997	6.3771000000000004		7.3257000000000003	7.6504000000000003	8.3207000000000004	8.9441000000000006	9.5635999999999992	10.084199999999999	10.7841	11.5746	11.9213	12.3215	12.3758	12.7126	12.835599999999999	13.1325	13.3865	13.689	13.796099999999999	13.5975	13.6921	14.111499999999999	13.9467
P4_Y (A4)	A4	P4	HCT-116	F_1x	Triton	MM13	Control	P4HCT-116TritonMM13	2.5219999999999998	3.2814999999999999	3.1293000000000002	3.2582	3.7212999999999998	4.0983999999999998	4.5152000000000001	4.9184000000000001	4.9880000000000004	5.601	5.7092999999999998	6.7564000000000002	7.4558999999999997	7.3634000000000004	7.7537000000000003	8.6692	9.5597999999999992	9.5576000000000008	10.2624		11.735300000000001	12.5939	13.2148	14.133800000000001	14.9505	15.235799999999999	16.470300000000002	16.9512	17.546199999999999	18.541799999999999	19.1341	19.343699999999998	20.157399999999999	20.638200000000001	21.500599999999999	21.708100000000002	22.116700000000002	22.876200000000001	23.206600000000002	23.5794	23.728200000000001
P4_Y (A8)	A8	P4	HCT-116	F_1x	pos.Ctrl	MM13	Control	P4HCT-116pos.CtrlMM13	2.6488999999999998	3.4102000000000001	3.6585999999999999	3.4548999999999999	3.6880000000000002	4.7276999999999996	4.8642000000000003	5.0688000000000004	5.3617999999999997	6.1304999999999996	6.3654999999999999	6.7995999999999999	7.1528	7.7156000000000002	8.4819999999999993	9.1061999999999994	9.5375999999999994	9.5576000000000008	9.6053999999999995		10.4811	10.6729	11.501300000000001	12.0319	12.5784	12.996	14.129300000000001	14.733499999999999	15.354699999999999	15.5646	16.233000000000001	16.7454	17.3384	17.0825	17.0901	17.5382	18.487200000000001	18.526599999999998	18.860700000000001	19.021000000000001	19.884699999999999
P4_Y (B11)	B11	P4	HCT-116	F_1x	200	MM11	EF1a_RAS-Sensor	P4HCT-116200MM11	5.4386000000000001	5.8646000000000003	6.0187999999999997	6.3463000000000003	7.2549999999999999	7.6666999999999996	7.7888999999999999	8.3803999999999998	8.8552999999999997	9.3780000000000001	10.062099999999999	10.820600000000001	11.826700000000001	11.6699	12.588800000000001	13.173400000000001	13.477	14.458600000000001	14.8019		15.7799	16.773900000000001	17.154399999999999	18.637499999999999	19.6907	20.6494	21.7897	22.3005	23.160499999999999	24.196000000000002	26.410699999999999	26.791699999999999	27.239799999999999	28.0794	29.117599999999999	29.998100000000001	30.285299999999999	31.415900000000001	31.861599999999999	32.685299999999998	33.420900000000003
P4_Y (B4)	B4	P4	HCT-116	F_1x	0	MM11	EF1a_RAS-Sensor	P4HCT-1160MM11	4.7019000000000002	4.8139000000000003	4.5052000000000003	5.0892999999999997	6.0510999999999999	5.8353999999999999	6.3103999999999996	7.0042999999999997	7.5664999999999996	7.8533999999999997	7.9608999999999996	9.0096000000000007	9.7429000000000006	10.183999999999999	10.756600000000001	10.6685	11.825699999999999	12.285399999999999	13.115399999999999		14.067299999999999	14.1661	15.4154	16.7836	17.547899999999998	17.903199999999998	19.1188	19.711300000000001	19.829699999999999	21.154800000000002	21.415700000000001	21.661899999999999	22.781300000000002	23.468	23.715	24.672699999999999	25.182600000000001	25.664000000000001	26.038900000000002	26.4297	26.8949
P4_Y (B8)	B8	P4	HCT-116	F_1x	50	MM11	EF1a_RAS-Sensor	P4HCT-11650MM11	4.2756999999999996	4.6315999999999997	4.9771999999999998	5.3124000000000002	6.1439000000000004	6.2922000000000002	7.0369999999999999	7.5304000000000002	7.5395000000000003	8.2402999999999995	9.1008999999999993	9.3489000000000004	9.7718000000000007	10.4674	11.073	12.058400000000001	12.0741	13.140599999999999	13.115		14.1388	14.498100000000001	15.7341	16.352799999999998	17.2803	18.328099999999999	19.264600000000002	20.197600000000001	20.971699999999998	21.752700000000001	23.135000000000002	24.268699999999999	23.916599999999999	24.619499999999999	24.450299999999999	25.728999999999999	26.253599999999999	27.232800000000001	27.735600000000002	27.678100000000001	28.706099999999999
P4_Y (C11)	C11	P4	HCT-116	F_1x	200	MM11	EF1a_RAS-Sensor	P4HCT-116200MM11	5.3886000000000003	5.4057000000000004	5.5404	5.7850000000000001	6.0030999999999999	7.0461	7.6692	7.5301	8.5257000000000005	8.9726999999999997	9.2331000000000003	10.5824	10.9915	11.8879	12.464600000000001	12.6685	12.879200000000001	14.0547	14.821		15.563599999999999	16.784400000000002	17.470600000000001	18.308599999999998	19.627099999999999	20.519300000000001	21.8093	22.750399999999999	23.144200000000001	24.116900000000001	24.846900000000002	26.2608	27.272300000000001	28.0547	29.198699999999999	29.995999999999999	30.788399999999999	31.731000000000002	31.969200000000001	33.066000000000003	33.702599999999997
P4_Y (C4)	C4	P4	HCT-116	F_1x	0	MM11	EF1a_RAS-Sensor	P4HCT-1160MM11	5.2145999999999999	6.5614999999999997	7.4455	7.8346999999999998	8.1018000000000008	8.5414999999999992	9.4060000000000006	10.5481	10.99	11.2273	11.208600000000001	12.526999999999999	13.0122	13.1159	14.6569	15.0136	15.315	15.9374	17.4907		18.316700000000001	19.2927	20.904399999999999	21.7837	22.948799999999999	24.284500000000001	25.007200000000001	27.174600000000002	27.201899999999998	28.866299999999999	29.555399999999999	31.0884	32.603900000000003	33.470199999999998	34.516399999999997	35.773299999999999	36.259300000000003	37.2425	38.034599999999998	39.262500000000003	40.745199999999997
P4_Y (C8)	C8	P4	HCT-116	F_1x	50	MM11	EF1a_RAS-Sensor	P4HCT-11650MM11	4.9208999999999996	6.3444000000000003	6.7953999999999999	6.6577000000000002	8.0031999999999996	8.5661000000000005	9.1920999999999999	9.4901	10.319000000000001	10.7662	11.153499999999999	12.342700000000001	12.8134	13.6233	14.65	14.678000000000001	15.266299999999999	15.8317	16.1677		17.3414	18.123100000000001	19.1082	20.3597	21.373100000000001	22.1495	23.241599999999998	24.962	25.725100000000001	25.729299999999999	27.1464	28.1342	28.456600000000002	29.476700000000001	30.4819	30.626799999999999	32.457500000000003	33.610700000000001	34.7468	35.750700000000002	36.772199999999998
P4_Y (D11)	D11	P4	HCT-116	F_1x	200	MM11	EF1a_RAS-Sensor	P4HCT-116200MM11	4.9443000000000001	5.5103999999999997	5.8186	5.9794	6.8365999999999998	7.2466999999999997	7.7392000000000003	7.8621999999999996	8.8773999999999997	9.2963000000000005	9.0793999999999997	10.2264	10.620799999999999	11.2279	11.554	12.339	13.2172	13.725099999999999	13.9032		15.3887	16.711500000000001	17.658200000000001	18.369900000000001	19.420500000000001	20.308199999999999	21.264399999999998	22.4223	23.222899999999999	23.808299999999999	24.497399999999999	26.2942	26.802299999999999	27.9147	28.262899999999998	29.345199999999998	29.915299999999998	31.461400000000001	31.908999999999999	33.4602	34.085099999999997
P4_Y (D4)	D4	P4	HCT-116	F_1x	0	MM11	EF1a_RAS-Sensor	P4HCT-1160MM11	5.4617000000000004	8.6504999999999992	9.3130000000000006	9.6181000000000001	10.3116	10.8628	12.021599999999999	12.452199999999999	13.5296	14.3916	15.861700000000001	15.9717	16.582899999999999	17.8947	19.139500000000002	19.9941	20.525099999999998	20.566299999999998	22.1769		23.192	24.217099999999999	26.402699999999999	27.044899999999998	29.554500000000001	31.7438	32.650300000000001	34.176499999999997	35.718400000000003	37.266199999999998	37.519799999999996	38.978200000000001	39.671500000000002	40.517899999999997	41.322899999999997	42.5565	44.172600000000003	44.956899999999997	46.173499999999997	47.754899999999999	49.123199999999997
P4_Y (D8)	D8	P4	HCT-116	F_1x	50	MM11	EF1a_RAS-Sensor	P4HCT-11650MM11	5.8982000000000001	7.7995999999999999	8.8872999999999998	9.0965000000000007	9.9108000000000001	10.780900000000001	11.8757	12.9856	12.9444	14.8812	14.5718	16.404599999999999	17.493200000000002	18.9847	19.721399999999999	20.59	20.688199999999998	22.135300000000001	22.514500000000002		23.795100000000001	23.6327	25.757999999999999	27.1995	28.6892	30.547599999999999	31.8371	33.702599999999997	35.570700000000002	37.359000000000002	38.401299999999999	38.771599999999999	39.611800000000002	42.0961	41.518599999999999	42.279499999999999	43.493099999999998	44.316800000000001	45.757899999999999	46.693100000000001	47.972499999999997
P4_Y (E11)	E11	P4	HCT-116	F_1x	200	MM12	PY2_NarL-F.L.T	P4HCT-116200MM12	4.5049000000000001	4.7001999999999997	4.8109000000000002	5.2111000000000001	5.0617000000000001	6.0702999999999996	6.5221999999999998	6.8164999999999996	7.1222000000000003	7.8110999999999997	7.9907000000000004	8.2650000000000006	9.2500999999999998	9.8498999999999999	10.083	10.980399999999999	11.1629	11.5936	12.5245		12.680400000000001	13.5616	14.4755	15.4566	15.921099999999999	17.044	17.5732	18.186199999999999	19.446000000000002	20.3733	20.8797	21.255099999999999	22.128900000000002	23.148199999999999	23.7532	24.461099999999998	24.622699999999998	26.068300000000001	26.938600000000001	27.4495	28.063700000000001
P4_Y (E4)	E4	P4	HCT-116	F_1x	0	MM12	PY2_NarL-F.L.T	P4HCT-1160MM12	9.0694999999999997	10.242000000000001	9.8785000000000007	10.8908	11.837199999999999	12.6792	13.986800000000001	15.132	15.510899999999999	15.899900000000001	17.092099999999999	18.9115	19.273700000000002	20.171399999999998	21.9876	22.800999999999998	23.543700000000001	25.087299999999999	25.2715		25.675899999999999	28.1525	30.3172	31.685300000000002	32.719200000000001	34.719200000000001	36.104599999999998	38.401200000000003	39.435499999999998	40.710299999999997	42.222499999999997	43.424300000000002	44.450099999999999	45.946599999999997	47.359299999999998	48.819000000000003	50.747999999999998	51.758400000000002	52.933300000000003	54.432899999999997	56.156999999999996
P4_Y (E8)	E8	P4	HCT-116	F_1x	50	MM12	PY2_NarL-F.L.T	P4HCT-11650MM12	5.1654999999999998	7.6772999999999998	8.1466999999999992	8.6489999999999991	9.3630999999999993	10.075900000000001	11.3231	12.036799999999999	12.496600000000001	14.3215	14.6097	16.311800000000002	16.514199999999999	17.813199999999998	18.651599999999998	20.328399999999998	19.985299999999999	22.002400000000002	22.608799999999999		23.052499999999998	25.2074	26.764199999999999	28.106200000000001	29.421399999999998	31.177800000000001	33.043300000000002	34.6098	35.848500000000001	37.384	38.028100000000002	38.547699999999999	39.816899999999997	40.317100000000003	41.448399999999999	42.4617	44.129100000000001	45.148299999999999	45.756500000000003	47.769399999999997	49.344799999999999
P4_Y (F11)	F11	P4	HCT-116	F_1x	200	MM12	PY2_NarL-F.L.T	P4HCT-116200MM12	5.2981999999999996	5.1039000000000003	5.6031000000000004	6.1092000000000004	6.1470000000000002	6.6932	7.5382999999999996	8.2491000000000003	8.2565000000000008	8.8376000000000001	9.3681999999999999	9.5223999999999993	11.1516	10.728400000000001	11.5402	12.3565	12.5829	12.865600000000001	12.9916		14.483000000000001	15.357699999999999	16.1751	17.4224	18.122599999999998	19.283899999999999	20.592400000000001	21.546299999999999	22.3977	23.252700000000001	24.063600000000001	24.535299999999999	26.011199999999999	26.760100000000001	27.976500000000001	28.6419	29.433700000000002	30.6892	31.087	32.207299999999996	33.1798
P4_Y (F4)	F4	P4	HCT-116	F_1x	0	MM12	PY2_NarL-F.L.T	P4HCT-1160MM12	7.7945000000000002	7.8845999999999998	8.8728999999999996	8.9961000000000002	10.090999999999999	11.074199999999999	11.8712	12.8095	13.744300000000001	14.293200000000001	15.166600000000001	15.4077	16.500299999999999	16.4861	17.265899999999998	18.145800000000001	18.873899999999999	19.960799999999999	20.981400000000001		21.909199999999998	23.9861	24.696300000000001	26.091000000000001	27.553899999999999	29.079699999999999	30.589400000000001	31.708400000000001	33.2697	34.1751	35.715400000000002	37.286700000000003	37.710099999999997	38.7331	39.669499999999999	41.375500000000002	42.817599999999999	43.410400000000003	44.667000000000002	46.1858	47.289499999999997
P4_Y (F8)	F8	P4	HCT-116	F_1x	50	MM12	PY2_NarL-F.L.T	P4HCT-11650MM12	8.1874000000000002	9.18	8.8286999999999995	10.2553	11.095499999999999	11.8028	12.347300000000001	12.8261	14.1859	14.616400000000001	16.036300000000001	16.944199999999999	16.840599999999998	18.1738	19.125599999999999	19.6633	20.434999999999999	21.4452	22.123200000000001		23.2972	24.896999999999998	25.8843	26.822700000000001	28.806799999999999	30.181100000000001	31.6816	32.8232	34.667700000000004	35.569200000000002	37.169800000000002	38.062600000000003	40.064100000000003	41.573799999999999	42.249400000000001	44.173900000000003	45.067	46.547400000000003	47.864600000000003	48.364400000000003	50.091999999999999
P4_Y (G11)	G11	P4	HCT-116	F_1x	200	MM12	PY2_NarL-F.L.T	P4HCT-116200MM12	4.2568000000000001	5.04	5.0190000000000001	4.8842999999999996	5.4630000000000001	5.9222000000000001	6.2744999999999997	6.8308999999999997	7.5831	7.8699000000000003	8.4060000000000006	8.9314	9.6229999999999993	10.477600000000001	10.8339	11.578900000000001	11.959199999999999	11.927899999999999	12.9184		13.6386	14.117599999999999	15.1334	15.6761	16.7758	17.918299999999999	18.587599999999998	19.703800000000001	20.2944	20.677299999999999	21.721699999999998	23.148599999999998	23.35	24.255700000000001	24.4542	24.993099999999998	26.037299999999998	26.876899999999999	26.927399999999999	28.259399999999999	28.460899999999999
P4_Y (G4)	G4	P4	HCT-116	F_1x	0	MM12	PY2_NarL-F.L.T	P4HCT-1160MM12	5.2066999999999997	6.0742000000000003	6.2233000000000001	6.4115000000000002	7.3674999999999997	8.0670999999999999	8.5800999999999998	9.4515999999999991	9.9923999999999999	10.540800000000001	11.126799999999999	12.1708	12.2727	13.4474	13.885	14.21	14.677300000000001	15.666399999999999	16.164999999999999		17.881599999999999	18.637499999999999	19.4771	20.6265	21.964500000000001	22.592600000000001	24.1496	25.443200000000001	26.1813	27.7103	28.686800000000002	29.829899999999999	31.019500000000001	31.4329	32.351799999999997	33.439599999999999	34.126600000000003	34.1875	35.761000000000003	37.189500000000002	37.719000000000001
P4_Y (G8)	G8	P4	HCT-116	F_1x	50	MM12	PY2_NarL-F.L.T	P4HCT-11650MM12	4.5839999999999996	4.9954000000000001	5.6375999999999999	5.5331999999999999	6.1220999999999997	6.8491999999999997	7.2123999999999997	7.3411	8.3116000000000003	8.9084000000000003	9.4038000000000004	10.069900000000001	10.9968	11.764099999999999	12.545299999999999	12.9716	13.3611	13.9138	14.833500000000001		15.0624	15.834899999999999	17.3111	18.3123	18.919599999999999	20.496600000000001	21.139199999999999	22.791899999999998	23.582899999999999	24.740100000000002	25.567900000000002	26.6066	27.2712	27.840199999999999	28.668600000000001	29.539000000000001	30.1477	31.8474	32.749699999999997	33.589199999999998	34.214500000000001
P5_Y (B11)	B11	P5	HCT-116	F_1x	200	MM14	EF1a_HSVTK	P5HCT-116200MM14	5.4021999999999997	5.8042499999999997	6.1311999999999998	6.4343000000000004	6.7518000000000002	7.2086499999999996	7.9240000000000004	8.1852999999999998	8.9058499999999992	9.9928500000000007	10.3401	10.890549999999999	12.1196	12.744949999999999	12.7201	13.77375	14.1313	15.1868	15.786799999999999		17.032	18.283650000000002	18.952249999999999	20.690950000000001	21.5121	22.87595	23.483650000000001	24.427350000000001	25.647549999999999	26.256450000000001	27.775300000000001	28.4329	28.883299999999998	29.620799999999999	30.4102	30.819600000000001	31.960799999999999	32.776000000000003	33.856650000000002	34.411549999999998	35.293550000000003
P5_Y (B4)	B4	P5	HCT-116	F_1x	0	MM14	EF1a_HSVTK	P5HCT-1160MM14	7.3937499999999998	7.9274500000000003	8.2508999999999997	8.6986500000000007	9.1495999999999995	9.7766500000000001	10.47095	10.786949999999999	11.7423	11.967599999999999	13.000999999999999	14.0968	14.686349999999999	15.892200000000001	16.057300000000001	17.38345	17.159800000000001	18.0566	19.019449999999999		20.495100000000001	21.9802	23.272400000000001	24.09075	26.0458	26.704650000000001	27.876899999999999	29.303750000000001	30.52195	31.42765	32.2303	32.933700000000002	33.491500000000002	34.212299999999999	34.657850000000003	35.790149999999997	36.991349999999997	37.970149999999997	38.437150000000003	39.363199999999999	40.5593
P5_Y (B8)	B8	P5	HCT-116	F_1x	50	MM14	EF1a_HSVTK	P5HCT-11650MM14	6.6471499999999999	6.4089499999999999	6.72105	7.4388500000000004	7.8474500000000003	8.6161999999999992	9.0947499999999994	9.6104500000000002	10.58685	11.2759	11.69825	12.857849999999999	13.60215	14.292899999999999	15.223699999999999	15.755850000000001	16.770900000000001	17.45795	17.952400000000001		19.033650000000002	20.667649999999998	21.7775	22.62575	23.8215	25.022950000000002	26.377050000000001	27.187249999999999	27.799050000000001	29.069050000000001	29.792649999999998	31.1614	32.091850000000001	32.996949999999998	33.629750000000001	34.861699999999999	35.501449999999998	36.543999999999997	37.707949999999997	38.791899999999998	39.453400000000002
P5_Y (C11)	C11	P5	HCT-116	F_1x	200	MM14	EF1a_HSVTK	P5HCT-116200MM14	5.96685	6.6012500000000003	6.6044499999999999	7.1921999999999997	7.7092999999999998	8.2327999999999992	8.6151499999999999	9.1922499999999996	10.134600000000001	10.7399	11.393649999999999	12.08165	12.8691	13.363849999999999	13.46505	14.861000000000001	15.123749999999999	16.120750000000001	16.759550000000001		17.915299999999998	19.099799999999998	20.273	21.410499999999999	22.068650000000002	23.098099999999999	24.387650000000001	25.521000000000001	26.756450000000001	27.266999999999999	28.118749999999999	29.02055	29.499549999999999	30.839849999999998	31.646799999999999	32.716549999999998	34.070950000000003	34.808549999999997	35.335500000000003	35.764099999999999	36.617649999999998
P5_Y (C4)	C4	P5	HCT-116	F_1x	0	MM14	EF1a_HSVTK	P5HCT-1160MM14	11.2538	10.7555	10.94685	11.75075	12.325100000000001	13.6676	14.55315	15.846349999999999	16.392299999999999	16.939800000000002	18.04975	19.211649999999999	20.492699999999999	21.176749999999998	22.332350000000002	23.3537	23.300049999999999	24.376799999999999	25.765250000000002		27.371700000000001	28.36205	29.990349999999999	31.483499999999999	32.997900000000001	34.855150000000002	36.18085	37.112200000000001	38.3245	39.672449999999998	40.550199999999997	41.136850000000003	42.234499999999997	43.248100000000001	44.227800000000002	45.0212	45.957050000000002	47.094200000000001	48.024000000000001	49.626199999999997	50.450400000000002
P5_Y (C8)	C8	P5	HCT-116	F_1x	50	MM14	EF1a_HSVTK	P5HCT-11650MM14	11.179	10.536	10.9061	12.0634	12.97475	13.784800000000001	14.725199999999999	15.78805	16.304400000000001	17.096399999999999	18.961300000000001	19.587800000000001	21.003499999999999	21.201450000000001	22.678999999999998	23.04335	24.074549999999999	25.010649999999998	26.123449999999998		27.564450000000001	29.246849999999998	30.806999999999999	32.538499999999999	34.089100000000002	35.638199999999998	36.418799999999997	37.990549999999999	39.492449999999998	40.807450000000003	41.920850000000002	42.592100000000002	43.93385	45.143149999999999	46.576549999999997	48.141199999999998	49.0518	50.594549999999998	52.416699999999999	53.881950000000003	55.508249999999997
P5_Y (D11)	D11	P5	HCT-116	F_1x	200	MM14	EF1a_HSVTK	P5HCT-116200MM14	6.6489000000000003	6.8229499999999996	6.8556999999999997	7.3061999999999996	8.3682499999999997	8.9001999999999999	9.4191000000000003	9.1994500000000006	9.82775	10.95135	11.4758	12.097149999999999	12.78805	14.01235	14.43075	14.574949999999999	15.545949999999999	16.851649999999999	17.614100000000001		18.843800000000002	20.507100000000001	21.209	22.556000000000001	23.4054	25.34545	26.373049999999999	26.9879	28.263000000000002	28.687650000000001	29.41095	29.6769	31.304099999999998	32.157499999999999	32.636749999999999	33.926850000000002	34.979849999999999	36.023249999999997	37.272350000000003	38.563450000000003	38.837850000000003
P5_Y (D4)	D4	P5	HCT-116	F_1x	0	MM14	EF1a_HSVTK	P5HCT-1160MM14	11.30655	12.08315	12.094900000000001	12.1965	13.252800000000001	14.7858	15.20645	16.367149999999999	17.236599999999999	18.114249999999998	19.685300000000002	20.02345	21.908300000000001	22.655000000000001	23.58155	24.883199999999999	24.972249999999999	25.959599999999998	27.495999999999999		28.895350000000001	30.45955	31.738350000000001	33.292549999999999	35.166499999999999	37.3994	38.92315	40.415799999999997	41.421100000000003	43.0991	44.204149999999998	44.823149999999998	46.840249999999997	47.498350000000002	49.048050000000003	49.740949999999998	50.673000000000002	52.020499999999998	52.900599999999997	54.292850000000001	55.852499999999999
P5_Y (D8)	D8	P5	HCT-116	F_1x	50	MM14	EF1a_HSVTK	P5HCT-11650MM14	12.4976	12.8339	12.87795	12.502800000000001	13.879	15.479649999999999	15.68995	16.794350000000001	17.45505	18.783349999999999	19.873799999999999	21.007400000000001	21.73545	23.088100000000001	23.748149999999999	23.957550000000001	25.821000000000002	26.378900000000002	27.4482		29.334700000000002	31.131150000000002	32.280749999999998	33.633499999999998	35.309350000000002	37.369250000000001	38.811100000000003	39.906649999999999	41.555399999999999	42.769950000000001	43.809750000000001	44.1614	45.503149999999998	45.982300000000002	47.108400000000003	48.53425	48.905700000000003	49.828499999999998	51.2575	52.216900000000003	53.082949999999997
P5_Y (E11)	E11	P5	HCT-116	F_1x	200	MM10	GFP	P5HCT-116200MM10	7.0225999999999997	7.4854500000000002	7.8159999999999998	8.4257000000000009	9.0010499999999993	9.5169499999999996	9.8948	10.091699999999999	11.31845	11.64335	12.598000000000001	13.1402	13.8047	14.8589	15.37435	16.11	16.937750000000001	16.975100000000001	17.88205		19.29485	20.74335	21.79055	22.3873	23.717949999999998	25.018049999999999	26.8309	28.167750000000002	28.879750000000001	30.286950000000001	30.601299999999998	31.583749999999998	32.207850000000001	33.226500000000001	33.775399999999998	35.132350000000002	35.28575	36.732399999999998	37.243650000000002	37.667099999999998	38.452849999999998
P5_Y (E4)	E4	P5	HCT-116	F_1x	0	MM10	GFP	P5HCT-1160MM10	12.5967	13.68515	13.518649999999999	14.242850000000001	14.594950000000001	15.83845	17.143899999999999	17.884250000000002	19.0901	19.6919	20.664200000000001	22.179600000000001	23.199000000000002	23.968	25.352150000000002	25.66705	26.864450000000001	27.495799999999999	28.695049999999998		30.54665	31.84	33.192950000000003	33.932699999999997	35.937849999999997	38.168900000000001	39.204949999999997	41.274450000000002	42.945999999999998	43.965150000000001	45.0107	46.680250000000001	47.975700000000003	48.154699999999998	49.400149999999996	50.610750000000003	51.889899999999997	52.746200000000002	54.3172	54.76905	56.450150000000001
P5_Y (E8)	E8	P5	HCT-116	F_1x	50	MM10	GFP	P5HCT-11650MM10	12.287100000000001	12.11135	12.0238	13.278449999999999	14.20115	15.033300000000001	15.814450000000001	16.563199999999998	17.774650000000001	19.243400000000001	19.98995	20.856549999999999	22.902100000000001	24.035699999999999	24.99905	24.8996	26.58605	27.618200000000002	28.133500000000002		30.520350000000001	31.649049999999999	33.558300000000003	35.271599999999999	37.093800000000002	38.595950000000002	40.670850000000002	41.877299999999998	43.784950000000002	44.905650000000001	46.08	47.532649999999997	48.035400000000003	48.947400000000002	49.672750000000001	51.055549999999997	51.809699999999999	52.588949999999997	53.6235	55.303550000000001	55.703000000000003
P5_Y (F11)	F11	P5	HCT-116	F_1x	200	MM10	GFP	P5HCT-116200MM10	5.8003	6.3673999999999999	6.4540499999999996	6.7495000000000003	7.16995	7.4476500000000003	8.4252000000000002	9.1035000000000004	9.4058499999999992	10.2806	11.17365	11.8447	12.742850000000001	13.3925	14.0945	15.148899999999999	15.449949999999999	15.8771	16.517250000000001		17.900849999999998	19.074349999999999	20.454799999999999	21.123750000000001	22.708549999999999	23.24605	25.164750000000002	26.662199999999999	27.62285	28.105149999999998	29.457699999999999	29.653449999999999	31.067499999999999	31.358799999999999	32.415750000000003	33.374650000000003	34.147100000000002	34.844200000000001	36.443950000000001	37.095700000000001	38.236049999999999
P5_Y (F4)	F4	P5	HCT-116	F_1x	0	MM10	GFP	P5HCT-1160MM10	11.32375	11.93605	12.6722	13.2941	14.3238	15.0161	16.380600000000001	16.605350000000001	17.70185	18.274049999999999	19.1402	20.702100000000002	21.783899999999999	22.58015	23.09975	24.370349999999998	24.12265	25.637049999999999	26.5398		28.346499999999999	30.35275	32.0124	33.246600000000001	35.299999999999997	37.142000000000003	38.700600000000001	39.783999999999999	41.15795	42.458199999999998	43.917499999999997	44.9649	46.064799999999998	47.118949999999998	47.298699999999997	48.436500000000002	49.279499999999999	50.135300000000001	51.494250000000001	52.672899999999998	53.930750000000003
P5_Y (F8)	F8	P5	HCT-116	F_1x	50	MM10	GFP	P5HCT-11650MM10	12.148	12.475949999999999	12.459250000000001	13.2821	13.6759	14.5572	15.94265	17.029450000000001	17.4802	18.38475	18.930900000000001	20.670300000000001	21.489049999999999	22.4453	23.146450000000002	24.6205	25.662299999999998	26.299299999999999	26.778400000000001		29.546500000000002	30.985600000000002	32.302750000000003	34.120899999999999	35.459200000000003	37.699399999999997	39.441600000000001	40.8904	42.83905	44.528350000000003	45.607700000000001	46.927100000000003	47.95185	49.450200000000002	49.793199999999999	50.807899999999997	51.926499999999997	53.151699999999998	54.683799999999998	55.662750000000003	57.175699999999999
P5_Y (G11)	G11	P5	HCT-116	F_1x	200	MM10	GFP	P5HCT-116200MM10	5.2497499999999997	5.7132500000000004	5.3910499999999999	5.7054999999999998	6.82545	7.2937000000000003	8.3207000000000004	8.6138999999999992	8.8989499999999992	9.6416500000000003	10.22845	11.286849999999999	11.66475	12.644399999999999	13.3911	13.6858	13.947050000000001	14.2502	15.29885		16.922999999999998	17.486499999999999	18.267900000000001	19.421749999999999	20.735700000000001	21.837700000000002	22.782250000000001	23.81795	24.725750000000001	25.95195	26.754799999999999	28.036750000000001	27.54645	28.634250000000002	29.23685	29.50545	29.63935	30.770849999999999	31.175750000000001	32.40305	32.570349999999998
P5_Y (G4)	G4	P5	HCT-116	F_1x	0	MM10	GFP	P5HCT-1160MM10	7.1905000000000001	7.6234999999999999	7.9619	8.2347000000000001	8.5908499999999997	9.1752500000000001	9.8610500000000005	10.348750000000001	10.78	12.096450000000001	12.557399999999999	13.394299999999999	14.306649999999999	14.972049999999999	15.32715	16.250050000000002	16.8812	17.75705	18.63655		19.621700000000001	20.508050000000001	21.68655	22.858450000000001	24.199149999999999	25.308499999999999	26.593499999999999	27.762550000000001	28.71105	29.822949999999999	30.815049999999999	31.34695	32.323149999999998	33.240299999999998	33.521999999999998	33.77525	34.414450000000002	35.270299999999999	35.531550000000003	36.213999999999999	37.247199999999999
P5_Y (G8)	G8	P5	HCT-116	F_1x	50	MM10	GFP	P5HCT-11650MM10	6.8282499999999997	7.3088499999999996	7.2361500000000003	7.9333	8.1611499999999992	9.1840499999999992	9.98245	10.2902	11.3025	11.95205	12.46865	13.067399999999999	14.5115	15.235099999999999	15.626799999999999	16.17895	16.90925	17.618950000000002	18.600149999999999		19.92775	21.363299999999999	22.217949999999998	23.581150000000001	24.684850000000001	26.14995	27.318100000000001	27.778549999999999	28.98855	30.14995	30.925149999999999	32.063749999999999	32.375	33.421950000000002	34.506799999999998	35.367699999999999	35.9253	37.2485	37.437150000000003	38.864100000000001	39.275149999999996
P2_Y (A10)	A10	P2	Igrov-1	F_1x	DMSO	MM13	Control	P2Igrov-1DMSOMM13	2.40015	2.5337499999999999	3.51885	3.66635	4.6693499999999997	5.1859500000000001	5.7818500000000004	5.84795	5.8235000000000001	6.1182499999999997	6.0929000000000002	6.6108000000000002	6.6113999999999997	6.5321999999999996	7.1437999999999997	6.8561500000000004	7.2786499999999998	7.4836	7.4302999999999999	8.0145499999999998	8.3509499999999992	9.0665499999999994	9.2270500000000002	9.25685	9.5405999999999995	10.060650000000001	10.83145	11.753299999999999	12.093400000000001	12.83015	13.07845	14.061500000000001	14.83625	15.84075	15.677199999999999	16.45045	17.12125	17.572749999999999	18.24485	18.575199999999999	18.607749999999999
P2_Y (A3)	A3	P2	Igrov-1	F_1x	Triton	MM13	Control	P2Igrov-1TritonMM13	1.3504	1.0765499999999999	1.4303999999999999	2.2569499999999998	3.2555000000000001	2.8193000000000001	2.89975	3.23265	3.4405000000000001	3.71455	3.9645000000000001	3.8100499999999999	4.0218999999999996	4.0270999999999999	4.3989000000000003	4.8240499999999997	4.7190500000000002	5.1177999999999999	5.3960499999999998	5.3124000000000002	4.9619999999999997	5.0378999999999996	5.3221499999999997	5.6822499999999998	5.5648499999999999	6.1021000000000001	6.1546500000000002	6.0500499999999997	6.8912000000000004	7.2847999999999997	7.42415	7.7376500000000004	7.6087999999999996	7.4759000000000002	8.0592500000000005	8.5669500000000003	8.7940000000000005	8.7125500000000002	8.9803999999999995	9.5368499999999994	9.4450500000000002
P2_Y (A7)	A7	P2	Igrov-1	F_1x	pos.Ctrl	MM13	Control	P2Igrov-1pos.CtrlMM13	2.1102500000000002	2.395	3.2519999999999998	3.6978	4.0827499999999999	4.1822499999999998	3.9862500000000001	4.5313999999999997	4.5655000000000001	5.0109000000000004	4.7907500000000001	5.0786499999999997	5.1593	4.9623499999999998	5.0434000000000001	5.5481999999999996	5.3308999999999997	4.9521499999999996	5.5858999999999996	6.1569000000000003	5.3931500000000003	6.0472000000000001	6.5175999999999998	5.9276	6.25725	6.8456000000000001	7.6592000000000002	7.8324999999999996	8.1938499999999994	8.7424999999999997	9.1168499999999995	9.5711999999999993	10.32075	10.309950000000001	10.5222	11.460699999999999	12.296749999999999	12.51155	12.69145	13.528449999999999	14.0404
P2_Y (B10)	B10	P2	Igrov-1	F_1x	200	MM11	EF1a_RAS-Sensor	P2Igrov-1200MM11	5.2394999999999996	4.8055500000000002	5.2446000000000002	5.5429500000000003	5.2926500000000001	5.4670500000000004	5.71915	6.0569499999999996	6.0206	6.0986500000000001	6.6261000000000001	6.8120000000000003	6.9555499999999997	7.4521499999999996	7.6555499999999999	7.665	7.9188000000000001	8.5982500000000002	8.8070000000000004	8.8817500000000003	9.3833000000000002	9.8213500000000007	10.3278	10.78825	11.3653	11.99715	12.29045	13.324249999999999	13.714600000000001	14.112299999999999	14.827299999999999	14.6126	15.3078	16.119299999999999	16.85275	18.41065	18.758299999999998	18.616250000000001	19.848800000000001	20.5288	20.71255
P2_Y (B3)	B3	P2	Igrov-1	F_1x	0	MM11	EF1a_RAS-Sensor	P2Igrov-10MM11	7.0042999999999997	8.2604000000000006	9.1883499999999998	9.5201499999999992	11.2438	11.426349999999999	12.39715	13.2462	13.2218	13.480449999999999	13.55045	14.089549999999999	15.270899999999999	15.861000000000001	15.6365	15.8575	16.644549999999999	17.072849999999999	17.443100000000001	18.100200000000001	19.716200000000001	20.0533	21.27375	22.4038	23.172799999999999	24.629249999999999	25.6401	26.134899999999998	26.630700000000001	27.624199999999998	27.6661	28.8538	29.699649999999998	29.245049999999999	30.4465	31.115549999999999	31.982800000000001	32.661499999999997	32.92015	32.968800000000002	34.185000000000002
P2_Y (B7)	B7	P2	Igrov-1	F_1x	50	MM11	EF1a_RAS-Sensor	P2Igrov-150MM11	4.9789000000000003	5.0148999999999999	6.0243000000000002	6.4435500000000001	7.4542000000000002	8.3636999999999997	8.4072499999999994	8.1828000000000003	8.4390499999999999	8.9500499999999992	9.4779	9.9132999999999996	9.6643000000000008	10.341799999999999	10.316599999999999	10.79265	11.311500000000001	11.459300000000001	11.602	12.26285	13.102349999999999	13.5322	14.28105	14.489750000000001	15.335900000000001	15.335050000000001	15.63335	16.234349999999999	17.491150000000001	18.769850000000002	19.390450000000001	20.1068	20.40765	20.35895	21.118600000000001	21.0855	22.172750000000001	22.158249999999999	23.370450000000002	23.296099999999999	23.603899999999999
P2_Y (C10)	C10	P2	Igrov-1	F_1x	200	MM11	EF1a_RAS-Sensor	P2Igrov-1200MM11	5.1660500000000003	6.0567500000000001	6.5536000000000003	7.5548999999999999	8.3823500000000006	9.0336999999999996	9.4114500000000003	9.7575500000000002	10.388450000000001	9.8838000000000008	9.7827999999999999	10.334149999999999	10.418749999999999	10.924849999999999	11.09315	11.723649999999999	12.658099999999999	12.9171	12.96705	13.607049999999999	14.768549999999999	14.86655	15.7334	15.98465	16.53875	16.959250000000001	18.1572	19.031400000000001	20.402000000000001	21.304349999999999	22.195799999999998	22.463200000000001	24.075199999999999	25.088850000000001	26.49935	26.726900000000001	27.6876	29.387699999999999	28.85135	28.18805	29.010850000000001
P2_Y (C3)	C3	P2	Igrov-1	F_1x	0	MM11	EF1a_RAS-Sensor	P2Igrov-10MM11	9.50535	10.225300000000001	11.079050000000001	11.16255	12.423999999999999	12.367599999999999	13.345599999999999	13.625299999999999	14.495050000000001	14.270200000000001	15.2683	15.347250000000001	15.6173	16.775849999999998	16.664300000000001	17.944299999999998	18.134650000000001	18.6416	20.508800000000001	20.965	22.692450000000001	23.038350000000001	24.662299999999998	25.541550000000001	26.607600000000001	28.728300000000001	29.306850000000001	31.6555	32.450049999999997	32.595050000000001	34.745649999999998	36.428649999999998	36.192500000000003	37.749749999999999	38.264850000000003	37.831400000000002	38.573999999999998	38.728099999999998	39.450400000000002	39.635950000000001	38.787599999999998
P2_Y (C7)	C7	P2	Igrov-1	F_1x	50	MM11	EF1a_RAS-Sensor	P2Igrov-150MM11	10.4718	12.00365	13.804	15.274699999999999	16.829699999999999	17.732250000000001	19.6738	20.67765	21.101949999999999	21.232900000000001	22.616499999999998	22.991499999999998	24.5808	24.562449999999998	25.71555	26.7685	27.463650000000001	28.66835	29.1295	29.47625	32.051200000000001	32.42745	33.288249999999998	35.6922	36.106749999999998	38.0548	38.832850000000001	40.6736	41.467100000000002	42.694200000000002	43.742899999999999	45.239750000000001	46.581000000000003	47.56	48.174900000000001	50.5959	51.050649999999997	51.336150000000004	51.158499999999997	51.978400000000001	52.067050000000002
P2_Y (D10)	D10	P2	Igrov-1	F_1x	200	MM11	EF1a_RAS-Sensor	P2Igrov-1200MM11	7.3019999999999996	8.8620000000000001	10.065099999999999	11.2972	11.821350000000001	12.342750000000001	13.1174	14.1557	15.075950000000001	15.931950000000001	16.829599999999999	16.778199999999998	17.189050000000002	17.525649999999999	18.379149999999999	18.412299999999998	19.475149999999999	19.77495	20.236750000000001	21.267399999999999	21.792249999999999	22.7624	23.500050000000002	23.935700000000001	25.53125	26.84065	28.60455	29.771149999999999	30.342700000000001	30.735299999999999	31.834050000000001	33.832949999999997	34.61215	36.346249999999998	36.19755	37.948900000000002	38.374450000000003	39.006799999999998	38.75	39.718000000000004	39.25985
P2_Y (D3)	D3	P2	Igrov-1	F_1x	0	MM11	EF1a_RAS-Sensor	P2Igrov-10MM11	5.0841000000000003	7.1494999999999997	7.8246500000000001	8.6720500000000005	10.672800000000001	11.0258	11.67545	12.0213	11.874000000000001	12.1006	12.5825	13.75915	13.974	13.8659	14.30415	14.91915	15.37355	15.880050000000001	16.40335	17.20795	17.895700000000001	18.277049999999999	18.757449999999999	19.733049999999999	22.086500000000001	21.965900000000001	22.682449999999999	22.76315	23.9541	25.36	24.907	28.065200000000001	28.513300000000001	29.2972	30.666	30.642600000000002	30.8979	31.978100000000001	32.5428	32.401449999999997	32.664000000000001
P2_Y (D7)	D7	P2	Igrov-1	F_1x	50	MM11	EF1a_RAS-Sensor	P2Igrov-150MM11	7.1105499999999999	10.6547	12.739800000000001	14.0375	16.054649999999999	17.156649999999999	17.731000000000002	19.051449999999999	20.428699999999999	20.990349999999999	20.849299999999999	21.606950000000001	22.5623	22.8203	23.7791	25.2745	25.902100000000001	26.81175	27.488399999999999	27.367899999999999	30.507149999999999	30.229900000000001	31.687650000000001	32.88015	35.42145	35.900199999999998	37.5899	39.0197	39.743250000000003	40.403799999999997	42.114350000000002	42.768549999999998	44.571350000000002	45.707250000000002	47.012599999999999	48.304200000000002	48.974899999999998	49.089700000000001	49.092700000000001	49.743450000000003	50.227350000000001
P2_Y (E10)	E10	P2	Igrov-1	F_1x	200	MM12	PY2_NarL-F.L.T	P2Igrov-1200MM12	8.2640999999999991	9.8361000000000001	10.842499999999999	11.971	12.297499999999999	13.12365	13.4526	13.6844	14.3736	14.880649999999999	14.8742	15.242150000000001	16.3246	17.3093	17.547550000000001	17.2422	18.373999999999999	19.267250000000001	19.409300000000002	20.035049999999998	22.557549999999999	22.783799999999999	23.9681	25.2637	25.985849999999999	26.72635	27.552399999999999	28.390999999999998	28.229199999999999	30.302800000000001	31.111149999999999	32.769599999999997	33.018749999999997	33.235950000000003	33.447200000000002	34.651350000000001	35.313949999999998	36.954099999999997	36.742049999999999	37.686300000000003	38.07085
P2_Y (E3)	E3	P2	Igrov-1	F_1x	0	MM12	PY2_NarL-F.L.T	P2Igrov-10MM12	6.2703499999999996	8.8247499999999999	10.488899999999999	11.9373	12.973649999999999	13.90025	15.73235	15.87635	16.4238	17.027200000000001	17.225950000000001	18.13625	17.873149999999999	18.090350000000001	18.8841	19.118649999999999	19.965450000000001	19.867650000000001	20.771249999999998	20.988199999999999	22.72495	22.614049999999999	23.814699999999998	24.036049999999999	24.834	26.0669	26.799099999999999	27.015799999999999	27.54365	27.928650000000001	29.403649999999999	30.585000000000001	31.730699999999999	32.152850000000001	32.865250000000003	34.537849999999999	35.2928	35.26005	34.936349999999997	35.394599999999997	35.337600000000002
P2_Y (E7)	E7	P2	Igrov-1	F_1x	50	MM12	PY2_NarL-F.L.T	P2Igrov-150MM12	4.3014999999999999	8.8210999999999995	10.014049999999999	12.22875	13.016500000000001	13.833600000000001	14.125349999999999	14.806749999999999	15.20275	15.8108	16.279599999999999	16.726749999999999	17.394300000000001	17.806850000000001	18.792100000000001	18.920000000000002	18.910900000000002	19.735800000000001	20.902999999999999	21.65165	23.32555	23.560300000000002	24.5471	25.021699999999999	25.767250000000001	26.569099999999999	27.824549999999999	29.610749999999999	30.348849999999999	31.492799999999999	31.98255	32.492350000000002	33.947699999999998	34.414149999999999	34.647449999999999	35.746099999999998	36.961649999999999	37.948599999999999	37.224850000000004	37.553249999999998	37.794800000000002
P2_Y (F10)	F10	P2	Igrov-1	F_1x	200	MM12	PY2_NarL-F.L.T	P2Igrov-1200MM12	7.4151499999999997	8.3400999999999996	8.5077999999999996	9.8362999999999996	10.834949999999999	12.209099999999999	12.73085	13.050850000000001	13.81385	14.277049999999999	14.97475	14.350199999999999	14.53505	14.42975	14.9582	15.6195	15.9581	16.69585	16.82565	17.196149999999999	18.01295	18.780449999999998	18.362400000000001	19.426300000000001	20.06315	21.0684	22.75065	22.554649999999999	23.246700000000001	24.122599999999998	25.471299999999999	24.995450000000002	26.130299999999998	26.88965	27.953150000000001	28.177600000000002	29.170649999999998	29.695650000000001	30.84055	31.764099999999999	32.074150000000003
P2_Y (F3)	F3	P2	Igrov-1	F_1x	0	MM12	PY2_NarL-F.L.T	P2Igrov-10MM12	10.494149999999999	12.33065	14.299149999999999	16.018650000000001	16.8431	18.5426	19.6555	20.206849999999999	21.686299999999999	21.286950000000001	22.672799999999999	22.968399999999999	23.890999999999998	24.383600000000001	24.1769	25.995950000000001	26.24005	27.063649999999999	27.556000000000001	27.89115	29.876049999999999	28.914999999999999	31.308250000000001	32.792850000000001	34.207900000000002	35.432600000000001	36.332850000000001	37.180599999999998	39.35295	39.4542	40.381399999999999	42.605800000000002	43.663049999999998	43.914349999999999	45.973199999999999	46.890250000000002	47.641649999999998	48.468499999999999	48.177349999999997	48.615450000000003	47.577449999999999
P2_Y (F7)	F7	P2	Igrov-1	F_1x	50	MM12	PY2_NarL-F.L.T	P2Igrov-150MM12	6.6283000000000003	7.9462000000000002	8.6971500000000006	9.8952500000000008	11.09675	12.627700000000001	12.940799999999999	13.6501	14.33675	15.511900000000001	16.190449999999998	16.898150000000001	16.574999999999999	17.724049999999998	18.29975	18.555299999999999	19.747199999999999	20.818650000000002	21.625450000000001	21.87285	23.582899999999999	24.3323	24.444900000000001	26.300149999999999	27.3507	29.052199999999999	29.2197	30.620850000000001	31.652200000000001	32.530999999999999	32.63805	33.69435	35.454450000000001	36.875050000000002	38.107500000000002	38.697400000000002	40.144799999999996	40.238900000000001	40.923000000000002	40.847999999999999	41.353549999999998
P2_Y (G10)	G10	P2	Igrov-1	F_1x	200	MM12	PY2_NarL-F.L.T	P2Igrov-1200MM12	7.9131	8.1873000000000005	8.8404500000000006	10.0137	11.259449999999999	11.928800000000001	12.453099999999999	12.9992	12.435449999999999	12.453849999999999	12.82545	13.867100000000001	14.2303	15.273099999999999	15.2301	16.308949999999999	16.841349999999998	17.449349999999999	17.632999999999999	17.999649999999999	18.959900000000001	19.36	19.860150000000001	20.865600000000001	21.297000000000001	21.998249999999999	22.967099999999999	23.219349999999999	24.25975	25.3049	25.755199999999999	27.069299999999998	28.427700000000002	29.223600000000001	30.834949999999999	31.975000000000001	32.73415	33.02055	33.440899999999999	34.543349999999997	35.535299999999999
P2_Y (G3)	G3	P2	Igrov-1	F_1x	0	MM12	PY2_NarL-F.L.T	P2Igrov-10MM12	6.7676499999999997	8.8359500000000004	9.6104500000000002	10.82185	11.57315	12.9453	13.586550000000001	14.33	14.36665	14.859450000000001	15.56565	16.13935	16.53755	16.0581	15.7117	16.836400000000001	17.154350000000001	17.688600000000001	18.6952	19.663350000000001	20.945650000000001	21.677600000000002	22.720549999999999	24.572649999999999	25.51315	25.8996	27.586300000000001	28.101900000000001	29.096150000000002	30.376899999999999	31.1251	32.001800000000003	33.958300000000001	34.855800000000002	35.40795	36.314700000000002	37.444800000000001	37.126950000000001	37.707999999999998	38.513649999999998	38.138249999999999
P2_Y (G7)	G7	P2	Igrov-1	F_1x	50	MM12	PY2_NarL-F.L.T	P2Igrov-150MM12	5.5768000000000004	6.4352499999999999	7.2329999999999997	7.8059000000000003	8.4331999999999994	9.6380499999999998	10.29975	11.00985	11.422549999999999	11.946099999999999	12.334849999999999	12.23485	12.9839	12.782249999999999	13.43135	13.6273	14.425000000000001	14.46415	14.5548	15.024050000000001	15.46655	15.11965	16.630299999999998	17.159400000000002	16.654299999999999	17.44885	17.981400000000001	18.619050000000001	19.708649999999999	20.290700000000001	21.1327	21.7743	22.793600000000001	22.761849999999999	23.84085	24.471399999999999	25.667850000000001	26.716750000000001	27.10275	26.623850000000001	26.739699999999999
P3_Y (B10)	B10	P3	Igrov-1	F_1x	200	MM14	EF1a_HSVTK	P3Igrov-1200MM14	5.9304500000000004	7.8453499999999998	8.6937499999999996	8.9893000000000001	10.051550000000001	10.52575	10.9983	11.750450000000001	12.11415	12.60585	13.266	12.985849999999999	13.6745	14.19265	14.739800000000001	15.132250000000001	15.30245	16.291350000000001	16.63495		17.449649999999998	18.616050000000001	18.8432	20.039200000000001	20.49905	21.3583	23.225000000000001	24.147200000000002	23.7639	24.527799999999999	25.422049999999999	25.938600000000001	26.176950000000001	27.5885	28.7697	28.828900000000001	28.868600000000001	29.44885	29.81465	29.3247	30.0307
P3_Y (B3)	B3	P3	Igrov-1	F_1x	0	MM14	EF1a_HSVTK	P3Igrov-10MM14	7.6570499999999999	8.3954500000000003	9.3135999999999992	10.7874	11.0045	11.83175	12.338749999999999	13.207549999999999	13.235250000000001	13.58935	13.719799999999999	14.093999999999999	14.732900000000001	15.31115	15.847	16.155750000000001	16.711950000000002	17.62125	18.3748		18.915749999999999	19.965499999999999	20.76135	22.32555	23.614699999999999	24.523700000000002	25.3049	25.614899999999999	26.8171	27.309899999999999	28.148350000000001	29.674250000000001	29.987349999999999	31.805700000000002	33.749400000000001	33.4617	34.059800000000003	34.4206	34.496250000000003	34.422800000000002	34.622999999999998
P3_Y (B7)	B7	P3	Igrov-1	F_1x	50	MM14	EF1a_HSVTK	P3Igrov-150MM14	6.5926999999999998	7.3010000000000002	8.1510999999999996	9.2168500000000009	9.5764499999999995	10.233549999999999	10.57165	10.5022	10.34975	10.289949999999999	11.0892	11.48335	11.700850000000001	12.09295	12.153499999999999	12.3513	12.4984	13.226699999999999	13.85345		14.8818	14.2889	15.099299999999999	15.800050000000001	16.851649999999999	17.524450000000002	17.993849999999998	18.947900000000001	19.62725	21.170100000000001	21.563300000000002	22.269749999999998	22.004750000000001	22.3978	22.912700000000001	23.6416	23.844850000000001	23.327400000000001	23.368549999999999	23.787700000000001	23.78745
P3_Y (C10)	C10	P3	Igrov-1	F_1x	200	MM14	EF1a_HSVTK	P3Igrov-1200MM14	7.8606499999999997	9.3884500000000006	10.9757	13.45255	14.596450000000001	14.86975	15.819800000000001	16.25705	16.504999999999999	16.354050000000001	17.525649999999999	18.13015	19.245249999999999	19.444849999999999	19.659949999999998	20.6037	22.190550000000002	22.260999999999999	22.705549999999999		23.389199999999999	25.156949999999998	25.68655	27.247250000000001	28.312249999999999	28.264199999999999	29.654350000000001	28.678450000000002	30.9024	31.7516	32.342100000000002	32.666350000000001	34.582700000000003	35.575150000000001	36.209850000000003	36.896549999999998	37.10295	38.135399999999997	38.628100000000003	39.558500000000002	39.444899999999997
P3_Y (C3)	C3	P3	Igrov-1	F_1x	0	MM14	EF1a_HSVTK	P3Igrov-10MM14	8.8678500000000007	10.03805	12.30955	13.5921	14.4482	15.0204	15.77075	16.267499999999998	16.699349999999999	17.553750000000001	18.159199999999998	18.724900000000002	19.544450000000001	20.11345	20.040400000000002	20.7623	20.69125	21.22795	22.313649999999999		23.841750000000001	24.371949999999998	25.138349999999999	26.599499999999999	27.573499999999999	28.7895	29.925149999999999	30.284649999999999	31.361049999999999	30.66255	31.647549999999999	33.073799999999999	35.16695	34.575699999999998	35.404699999999998	35.738199999999999	34.931049999999999	36.142150000000001	37.102400000000003	36.318849999999998	36.685699999999997
P3_Y (C7)	C7	P3	Igrov-1	F_1x	50	MM14	EF1a_HSVTK	P3Igrov-150MM14	8.7267499999999991	8.8769500000000008	9.6341999999999999	10.9567	12.338950000000001	11.727550000000001	12.842700000000001	13.057550000000001	13.7385	15.12555	15.13715	16.132000000000001	16.660150000000002	16.95485	17.457699999999999	18.123349999999999	18.479500000000002	19.567900000000002	19.845700000000001		21.305150000000001	21.522500000000001	22.633299999999998	23.977250000000002	24.495149999999999	26.908799999999999	28.211849999999998	29.4114	30.520700000000001	31.342500000000001	32.041899999999998	33.663899999999998	34.949649999999998	35.468850000000003	36.738700000000001	38.290649999999999	38.531849999999999	38.421599999999998	38.324550000000002	39.514749999999999	38.868749999999999
P3_Y (D10)	D10	P3	Igrov-1	F_1x	200	MM14	EF1a_HSVTK	P3Igrov-1200MM14	7.1477000000000004	7.6464999999999996	9.2235999999999994	10.165150000000001	10.614850000000001	12.234299999999999	12.02045	12.62875	13.492850000000001	14.145200000000001	14.08445	14.7773	15.1587	15.925050000000001	15.866149999999999	15.8522	16.62135	17.2805	17.688649999999999		19.26615	20.138500000000001	21.050699999999999	22.152750000000001	22.998850000000001	24.524100000000001	25.1173	24.97345	26.661750000000001	27.16835	28.348099999999999	29.555900000000001	28.9998	30.277349999999998	31.47345	32.901150000000001	32.744199999999999	33.538550000000001	33.317300000000003	33.322299999999998	33.235300000000002
P3_Y (D3)	D3	P3	Igrov-1	F_1x	0	MM14	EF1a_HSVTK	P3Igrov-10MM14	6.43865	8.8729499999999994	11.4078	12.83145	13.0535	13.51445	14.10285	14.8042	14.806699999999999	15.64085	15.82695	16.312049999999999	17.161100000000001	16.999300000000002	17.388850000000001	17.948550000000001	18.360099999999999	17.380700000000001	19.312049999999999		21.664950000000001	22.273099999999999	23.920750000000002	25.16685	25.882850000000001	26.15305	27.712	28.689699999999998	30.15305	30.05275	31.10295	32.09695	33.523150000000001	33.151499999999999	33.044649999999997	34.114649999999997	34.787550000000003	34.298400000000001	34.188249999999996	34.892899999999997	34.227150000000002
P3_Y (D7)	D7	P3	Igrov-1	F_1x	50	MM14	EF1a_HSVTK	P3Igrov-150MM14	5.8509500000000001	7.4549500000000002	8.7598000000000003	9.8705999999999996	10.07625	10.111000000000001	10.731299999999999	11.2118	11.749549999999999	12.772399999999999	13.35125	13.690899999999999	13.86495	14.868650000000001	15.20195	15.7354	16.546050000000001	16.514949999999999	17.436399999999999		17.626850000000001	18.230450000000001	19.403700000000001	20.094200000000001	20.142949999999999	21.722349999999999	22.88325	23.060949999999998	24.486699999999999	25.04795	26.097650000000002	26.00245	27.642199999999999	28.02065	28.2986	29.580749999999998	29.627700000000001	29.39385	30.467949999999998	30.6219	30.060600000000001
P3_Y (E10)	E10	P3	Igrov-1	F_1x	200	MM10	GFP	P3Igrov-1200MM10	4.5066499999999996	5.6140999999999996	7.1965000000000003	7.4730999999999996	8.2093000000000007	9.0961999999999996	9.7098499999999994	10.101800000000001	10.315250000000001	9.7621500000000001	10.4701	10.77355	11.6363	12.46105	12.367699999999999	12.6189	12.556699999999999	13.276899999999999	13.556800000000001		13.620749999999999	13.950950000000001	14.357150000000001	15.005549999999999	15.242100000000001	15.821999999999999	16.563949999999998	17.6219	18.745650000000001	20.184349999999998	20.3812	21.359749999999998	21.73395	22.8185	24.077000000000002	24.2879	25.418900000000001	25.728000000000002	27.073	26.018550000000001	26.25085
P3_Y (E3)	E3	P3	Igrov-1	F_1x	0	MM10	GFP	P3Igrov-10MM10	7.7172499999999999	8.2514000000000003	10.467599999999999	11.251200000000001	11.940899999999999	12.683149999999999	13.7623	14.347899999999999	14.73635	15.52	15.267200000000001	15.64255	16.332149999999999	16.714099999999998	17.165949999999999	18.5428	18.684650000000001	19.369800000000001	20.036999999999999		21.13175	22.747599999999998	23.88025	24.4148	25.037700000000001	25.808450000000001	27.193850000000001	28.4377	29.613250000000001	30.167950000000001	31.275300000000001	31.966049999999999	33.489400000000003	33.651299999999999	36.178800000000003	36.7012	37.877899999999997	38.817300000000003	39.894350000000003	39.034849999999999	40.223149999999997
P3_Y (E7)	E7	P3	Igrov-1	F_1x	50	MM10	GFP	P3Igrov-150MM10	5.9464499999999996	7.2408999999999999	8.5477000000000007	9.44	10.5556	10.93615	11.068099999999999	11.67545	11.89645	11.8988	12.330550000000001	12.699249999999999	13.47855	13.967650000000001	14.511850000000001	15.02895	15.7615	16.381699999999999	16.532800000000002		16.508500000000002	17.326000000000001	18.418050000000001	19.154599999999999	19.928899999999999	20.792149999999999	22.030850000000001	22.619450000000001	24.724150000000002	25.159549999999999	25.933250000000001	26.538699999999999	27.248249999999999	28.429749999999999	28.8188	30.41535	31.829049999999999	32.037399999999998	32.938800000000001	33.470050000000001	33.478549999999998
P3_Y (F10)	F10	P3	Igrov-1	F_1x	200	MM10	GFP	P3Igrov-1200MM10	6.8265000000000002	7.78965	9.0845000000000002	10.009550000000001	10.5398	11.4291	11.64955	12.58555	13.043749999999999	12.9841	13.124549999999999	13.929	14.11345	14.87345	15.067449999999999	15.48265	15.85735	16.081199999999999	16.521650000000001		18.947500000000002	19.397200000000002	21.067049999999998	21.912800000000001	23.332350000000002	24.030200000000001	26.178100000000001	26.3019	27.454750000000001	29.190449999999998	28.603149999999999	30.118300000000001	31.84545	31.934200000000001	32.679549999999999	33.61215	34.517000000000003	35.004199999999997	36.020249999999997	35.988599999999998	36.36645
P3_Y (F3)	F3	P3	Igrov-1	F_1x	0	MM10	GFP	P3Igrov-10MM10	5.6986499999999998	6.5659000000000001	7.4115000000000002	8.2652000000000001	8.6331500000000005	9.2318499999999997	9.1402000000000001	10.4696	10.335900000000001	11.1073	11.33315	12.233750000000001	12.20025	12.9983	12.96245	13.578099999999999	14.170349999999999	14.18135	14.62		15.126250000000001	14.722950000000001	16.122599999999998	16.7331	17.311699999999998	18.18845	18.878499999999999	19.849499999999999	20.536249999999999	21.844899999999999	22.960750000000001	24.689800000000002	25.654250000000001	26.525400000000001	27.934000000000001	28.03115	28.611899999999999	28.942049999999998	30.017399999999999	30.257100000000001	29.692599999999999
P3_Y (F7)	F7	P3	Igrov-1	F_1x	50	MM10	GFP	P3Igrov-150MM10	7.9212499999999997	9.5824999999999996	10.65695	11.945399999999999	13.0571	13.7889	14.233700000000001	14.85205	14.8285	15.363049999999999	15.470700000000001	15.63565	16.295349999999999	16.875599999999999	17.403749999999999	17.60145	18.44275	19.118600000000001	18.855149999999998		20.321400000000001	20.657299999999999	20.70655	21.8917	22.739899999999999	24.679099999999998	25.337350000000001	26.681799999999999	28.2195	28.847650000000002	29.835349999999998	31.208649999999999	32.403700000000001	33.051000000000002	34.207549999999998	35.627549999999999	36.442549999999997	36.484650000000002	36.924700000000001	38.38165	38.808549999999997
P3_Y (G10)	G10	P3	Igrov-1	F_1x	200	MM10	GFP	P3Igrov-1200MM10	5.4462999999999999	6.2227499999999996	6.9374500000000001	8.3125999999999998	8.91995	9.1560000000000006	9.5917499999999993	9.4187499999999993	9.6631499999999999	10.053649999999999	9.8207500000000003	9.8242999999999991	9.8670500000000008	10.56265	10.295949999999999	10.4642	10.6517	11.13565	10.9374		11.61985	12.145799999999999	12.9466	13.50695	14.36295	15.054349999999999	15.4537	15.79555	16.178750000000001	16.445550000000001	17.05415	17.3582	17.594249999999999	17.574200000000001	19.143999999999998	19.258749999999999	19.512799999999999	20.407050000000002	19.672650000000001	20.085000000000001	20.4879
P3_Y (G3)	G3	P3	Igrov-1	F_1x	0	MM10	GFP	P3Igrov-10MM10	12.036250000000001	12.42065	15.53665	16.992149999999999	17.600549999999998	19.059650000000001	20.006599999999999	20.2148	21.4023	22.15015	22.159549999999999	22.647349999999999	23.255600000000001	23.903199999999998	24.767199999999999	24.809950000000001	25.297499999999999	27.234850000000002	28.082350000000002		28.416699999999999	29.674399999999999	31.794450000000001	32.908250000000002	33.586849999999998	35.01735	36.063049999999997	36.544499999999999	37.37885	38.453099999999999	39.351900000000001	40.853850000000001	42.210650000000001	43.712899999999998	44.26925	44.745600000000003	45.528149999999997	45.386049999999997	46.286900000000003	46.681899999999999	46.720599999999997
P3_Y (G7)	G7	P3	Igrov-1	F_1x	50	MM10	GFP	P3Igrov-150MM10	5.3757000000000001	6.1176500000000003	7.4043000000000001	8.6829999999999998	9.4591999999999992	9.7804000000000002	10.17225	10.6564	11.33475	11.034800000000001	11.085000000000001	11.812200000000001	12.43695	12.8469	13.0989	13.597099999999999	13.9346	12.9666	13.863		12.65025	13.375349999999999	14.44965	15.736750000000001	16.097049999999999	16.8062	18.299949999999999	18.5488	20.073149999999998	20.489699999999999	20.190750000000001	20.636199999999999	21.307600000000001	21.943200000000001	23.706099999999999	23.284549999999999	23.6769	23.7911	24.261399999999998	24.767299999999999	25.822749999999999
P4_Y (A2)	A2	P4	SW620	F_1.5x	Triton	MM13	Control	P4SW620TritonMM13	6.8159000000000001	6.9641000000000002	7.9885000000000002	8.2905999999999995	8.4057999999999993	9.3466000000000005	8.8854000000000006	9.8155000000000001	10.092599999999999	10.602499999999999	10.955	10.6469	11.611499999999999	11.4238	12.167299999999999	12.2849	13.062799999999999	13.8085	13.872400000000001		14.8286	16.020600000000002	16.718900000000001	17.170200000000001	17.7835	18.999400000000001	19.409600000000001	19.2789	20.159400000000002	20.770900000000001	21.258600000000001	22.831700000000001	23.556799999999999	23.9544	24.084299999999999	25.886800000000001	26.3642	26.861599999999999	26.9053	27.749700000000001	28.631
P4_Y (A6)	A6	P4	SW620	F_1.5x	pos.Ctrl	MM13	Control	P4SW620pos.CtrlMM13	7.3464	8.9863	9.2463999999999995	9.6491000000000007	9.7594999999999992	10.357900000000001	10.8446	11.2997	11.2066	12.075100000000001	12.3355	12.305999999999999	12.6675	12.271599999999999	13.723100000000001	14.7262	14.1533	15.98	16.217500000000001		17.786100000000001	19.1538	19.562999999999999	19.1937	20.856100000000001	21.683900000000001	22.662800000000001	22.733499999999999	23.331700000000001	24.1358	25.5883	25.815000000000001	26.5015	26.400500000000001	27.8111	28.666	28.4237	28.802199999999999	29.6478	30.02	30.507400000000001
P4_Y (A9)	A9	P4	SW620	F_1.5x	DMSO	MM13	Control	P4SW620DMSOMM13	5.6317000000000004	6.6021000000000001	6.7544000000000004	7.0442	7.8612000000000002	7.7477	8.2613000000000003	8.2781000000000002	8.6058000000000003	9.6801999999999992	9.4763000000000002	9.4090000000000007	9.9456000000000007	10.2591	10.420400000000001	11.631500000000001	11.7484	12.0863	13.026199999999999		13.661799999999999	14.3772	15.1396	16.087299999999999	15.437799999999999	17.0823	18.1435	18.529900000000001	19.290500000000002	20.226099999999999	20.280999999999999	21.752500000000001	22.097200000000001	22.312999999999999	23.360499999999998	22.894300000000001	23.590800000000002	23.647200000000002	25.7057	25.533100000000001	26.049499999999998
P4_Y (B2)	B2	P4	SW620	F_1.5x	0	MM11	EF1a_RAS-Sensor	P4SW6200MM11	10.211499999999999	12.016	11.775600000000001	12.2342	11.8118	12.983000000000001	12.7845	13.878	13.8607	14.8794	15.612399999999999	16.1357	16.660499999999999	16.398099999999999	16.2971	17.4267	18.652100000000001	18.073	19.242699999999999		19.819199999999999	20.682300000000001	21.3032	23.098099999999999	23.816299999999998	23.818100000000001	24.856999999999999	25.215	26.6204	27.534700000000001	27.647500000000001	28.909099999999999	29.1478	30.0913	30.269600000000001	31.918500000000002	31.5703	32.014699999999998	33.003700000000002	33.927599999999998	35.084800000000001
P4_Y (B6)	B6	P4	SW620	F_1.5x	50	MM11	EF1a_RAS-Sensor	P4SW62050MM11	8.2507000000000001	10.5922	11.321099999999999	10.819100000000001	12.167299999999999	12.433199999999999	12.7441	12.4824	12.9274	13.193099999999999	14.5381	15.090400000000001	15.348000000000001	16.1586	16.117799999999999	16.143799999999999	17.1281	17.349900000000002	18.1098		19.228300000000001	22.212800000000001	21.749600000000001	23.183499999999999	24.541899999999998	25.478000000000002	26.396599999999999	26.672000000000001	27.547699999999999	27.3522	28.4269	28.427	30.082599999999999	30.4664	31.366599999999998	32.972200000000001	33.814500000000002	33.289000000000001	33.839399999999998	34.521799999999999	35.337600000000002
P4_Y (B9)	B9	P4	SW620	F_1.5x	200	MM11	EF1a_RAS-Sensor	P4SW620200MM11	10.7082	13.1485	13.090400000000001	13.2782	13.9901	14.726699999999999	14.8225	15.826700000000001	16.160399999999999	17.6935	16.8992	18.424499999999998	18.774699999999999	18.531400000000001	19.341899999999999	19.277999999999999	21.023299999999999	21.456600000000002	22.113900000000001		23.1967	24.599699999999999	25.7668	26.486000000000001	27.719100000000001	29.6968	29.831600000000002	31.1188	31.976099999999999	32.524799999999999	33.596299999999999	34.862299999999998	35.619500000000002	36.023299999999999	35.597499999999997	37.464599999999997	37.468899999999998	38.021799999999999	39.926200000000001	40.800899999999999	41.241599999999998
P4_Y (C2)	C2	P4	SW620	F_1.5x	0	MM11	EF1a_RAS-Sensor	P4SW6200MM11	11.2582	13.9292	14.4932	14.053800000000001	14.4239	14.896599999999999	16.149000000000001	15.9168	16.942	17.0427	18.1005	18.933599999999998	19.492999999999999	20.187200000000001	19.363700000000001	20.149000000000001	21.4132	22.6678	23.599		25.143799999999999	26.8949	26.7561	27.4755	28.6633	31.070599999999999	31.193999999999999	31.8355	31.684100000000001	32.964599999999997	35.150599999999997	35.697200000000002	36.876199999999997	37.697899999999997	38.216700000000003	39.645499999999998	40.320300000000003	40.471699999999998	41.600499999999997	43.088500000000003	43.91
P4_Y (C6)	C6	P4	SW620	F_1.5x	50	MM11	EF1a_RAS-Sensor	P4SW62050MM11	7.0223000000000004	12.9918	12.2392	12.952400000000001	13.0328	13.9131	14.4093	15.3424	16.1526	16.359000000000002	16.5427	17.450800000000001	18.2927	17.965900000000001	18.3325	19.294699999999999	20.109300000000001	20.827400000000001	20.991		24.6157	26.967300000000002	27.053699999999999	28.530100000000001	29.680499999999999	29.825600000000001	30.710699999999999	31.776199999999999	33.089700000000001	33.011400000000002	35.510300000000001	36.2254	37.458799999999997	38.017299999999999	39.173400000000001	39.914099999999998	40.552900000000001	41.273000000000003	41.903199999999998	42.185200000000002	42.911099999999998
P4_Y (C9)	C9	P4	SW620	F_1.5x	200	MM11	EF1a_RAS-Sensor	P4SW620200MM11	11.283899999999999	15.4878	14.919499999999999	15.309100000000001	15.8096	15.6265	16.261199999999999	17.622299999999999	18.006499999999999	18.697800000000001	19.177800000000001	20.146100000000001	20.291499999999999	20.745899999999999	21.9087	21.8279	22.648700000000002	22.4482	24.369599999999998		24.4878	24.778400000000001	26.104700000000001	27.15	28.361899999999999	30.340800000000002	30.001200000000001	31.5031	33.614600000000003	33.1462	33.942700000000002	34.816400000000002	36.848999999999997	37.720500000000001	38.645099999999999	38.690100000000001	39.485399999999998	40.730499999999999	42.206800000000001	42.044199999999996	43.202500000000001
P4_Y (D2)	D2	P4	SW620	F_1.5x	0	MM11	EF1a_RAS-Sensor	P4SW6200MM11	9.5969999999999995	10.5101	10.658200000000001	10.960900000000001	11.5801	11.808400000000001	12.555899999999999	13.1203	13.5006	14.633599999999999	14.1447	14.784000000000001	15.804600000000001	15.959	16.629100000000001	18.208400000000001	18.589200000000002	19.340299999999999	19.145499999999998		21.387799999999999	21.8249	23.340900000000001	24.665500000000002	23.8461	25.376300000000001	26.096	27.2163	28.938500000000001	27.7165	29.092300000000002	30.768599999999999	31.718699999999998	32.643000000000001	33.261099999999999	34.354500000000002	34.118899999999996	35.533299999999997	36.363399999999999	36.4724	38.004300000000001
P4_Y (D6)	D6	P4	SW620	F_1.5x	50	MM11	EF1a_RAS-Sensor	P4SW62050MM11	6.9066999999999998	11.904299999999999	11.6258	12.3508	12.283300000000001	12.2354	13.1351	12.474399999999999	13.1332	13.569900000000001	14.2136	14.350899999999999	14.519500000000001	14.798400000000001	15.428000000000001	15.5022	16.6205	16.0093	17.087700000000002		17.9346	16.4648	17.403300000000002	17.563800000000001	18.084099999999999	18.687200000000001	19.333200000000001	20.174099999999999	20.660599999999999	20.932500000000001	21.968499999999999	21.503299999999999	21.905999999999999	22.9802	23.2758	24.480499999999999	24.543099999999999	25.53	25.422799999999999	26.222100000000001	26.404699999999998
P4_Y (D9)	D9	P4	SW620	F_1.5x	200	MM11	EF1a_RAS-Sensor	P4SW620200MM11	8.89	14.3338	13.9307	13.662100000000001	14.0091	14.5434	15.664	15.7822	15.838800000000001	17.479700000000001	17.3994	18.208300000000001	19.500699999999998	19.129300000000001	20.039200000000001	20.389099999999999	22.343599999999999	21.371400000000001	23.583500000000001		25.605499999999999	26.074100000000001	27.061900000000001	28.237100000000002	29.1065	30.435199999999998	32.03	32.605200000000004	33.769199999999998	34.246699999999997	35.2654	35.3217	36.709499999999998	38.176200000000001	39.075699999999998	39.664700000000003	40.571100000000001	41.153199999999998	42.5184	42.112499999999997	43.701799999999999
P4_Y (E2)	E2	P4	SW620	F_1.5x	0	MM12	PY2_NarL-F.L.T	P4SW6200MM12	14.2294	14.205500000000001	13.5403	13.883800000000001	15.2575	16.134699999999999	16.663399999999999	16.522600000000001	17.910499999999999	16.716100000000001	18.412700000000001	18.8886	18.711300000000001	19.7073	20.2239	21.6327	22.2576	22.410499999999999	23.445900000000002		25.333400000000001	26.209700000000002	25.789300000000001	27.849399999999999	28.4924	29.001899999999999	29.811299999999999	32.302799999999998	31.920400000000001	33.561500000000002	33.981699999999996	34.983199999999997	35.820099999999996	36.752299999999998	36.925899999999999	37.944400000000002	38.5242	40.169499999999999	40.121899999999997	42.101999999999997	42.488700000000001
P4_Y (E6)	E6	P4	SW620	F_1.5x	50	MM12	PY2_NarL-F.L.T	P4SW62050MM12	7.0385	17.023	17.4254	16.5594	17.346800000000002	17.606300000000001	18.5383	19.815100000000001	19.793399999999998	20.913699999999999	21.264600000000002	21.822399999999998	22.463100000000001	22.788	22.6465	24.098199999999999	25.0154	26.430399999999999	26.8384		28.161200000000001	28.5672	30.007899999999999	29.821899999999999	31.009899999999998	33.3292	32.6798	33.755499999999998	35.762	36.609099999999998	36.363500000000002	37.073	37.971400000000003	40.366999999999997	41.136699999999998	40.834299999999999	42.285200000000003	43.091900000000003	43.5535	45.038600000000002	45.743099999999998
P4_Y (E9)	E9	P4	SW620	F_1.5x	200	MM12	PY2_NarL-F.L.T	P4SW620200MM12	12.463699999999999	14.09	14.8104	15.1745	14.9924	16.840900000000001	17.1797	17.928899999999999	18.564299999999999	18.893599999999999	19.080100000000002	20.592400000000001	21.938800000000001	21.298500000000001	22.387799999999999	22.823899999999998	23.3323	24.0062	24.404199999999999		26.7241	26.750800000000002	27.936399999999999	30.1663	30.008700000000001	31.6509	33.4373	34.251800000000003	35.390900000000002	36.426200000000001	36.304299999999998	37.551400000000001	38.6755	39.621000000000002	38.682899999999997	39.572699999999998	41.067900000000002	40.981299999999997	42.950200000000002	44.217300000000002	45.066000000000003
P4_Y (F2)	F2	P4	SW620	F_1.5x	0	MM12	PY2_NarL-F.L.T	P4SW6200MM12	12.6092	14.174099999999999	15.4739	15.488099999999999	15.7341	17.006799999999998	16.532800000000002	18.435500000000001	18.0303	19.856200000000001	19.665600000000001	20.6953	21.635200000000001	22.315899999999999	21.8125	22.2912	22.975100000000001	25.0624	25.346900000000002		27.478999999999999	28.2194	30.361000000000001	30.784800000000001	30.667300000000001	32.692700000000002	34.058199999999999	34.423000000000002	36.036099999999998	37.163600000000002	38.051499999999997	38.573099999999997	39.473700000000001	39.869	40.041400000000003	41.935000000000002	41.882399999999997	43.242199999999997	44.743200000000002	44.802	45.840699999999998
P4_Y (F6)	F6	P4	SW620	F_1.5x	50	MM12	PY2_NarL-F.L.T	P4SW62050MM12	6.3109000000000002	10.8652	10.604799999999999	11.2675	10.5976	12.0779	12.935700000000001	13.7264	13.6013	14.5739	14.654400000000001	14.9291	15.398199999999999	15.992000000000001	16.7456	17.069299999999998	16.8536	18.398700000000002	19.7332		20.039000000000001	21.474299999999999	21.958400000000001	23.042200000000001	24.563199999999998	24.3323	26.3446	26.314800000000002	27.510100000000001	29.0503	28.703600000000002	29.0763	31.610700000000001	32.494799999999998	32.5047	33.017499999999998	34.411799999999999	34.217399999999998	36.401600000000002	36.376100000000001	38.0593
P4_Y (F9)	F9	P4	SW620	F_1.5x	200	MM12	PY2_NarL-F.L.T	P4SW620200MM12	13.6976	14.4231	15.3607	16.021699999999999	15.2194	15.8711	16.5017	18.275400000000001	17.3306	18.1617	19.9191	20.514900000000001	20.488199999999999	21.2805	22.701000000000001	23.184200000000001	22.416399999999999	24.1861	25.302099999999999		25.848199999999999	27.9605	27.382400000000001	27.9983	30.910499999999999	31.987400000000001	32.7502	32.540300000000002	34.741399999999999	34.954700000000003	36.411499999999997	37.998899999999999	37.862400000000001	38.798099999999998	39.797800000000002	40.032600000000002	42.011099999999999	42.817300000000003	43.195099999999996	44.512700000000002	45.969099999999997
P4_Y (G2)	G2	P4	SW620	F_1.5x	0	MM12	PY2_NarL-F.L.T	P4SW6200MM12	8.8947000000000003	9.7957999999999998	10.578900000000001	10.4916	11.1206	12.1418	12.075100000000001	12.793200000000001	12.7401	13.9298	14.090400000000001	14.6843	15.238899999999999	15.8764	15.515499999999999	16.669899999999998	17.468599999999999	18.604800000000001	17.493500000000001		19.739899999999999	20.3965	21.980599999999999	22.293199999999999	22.886199999999999	24.752300000000002	26.0869	26.462700000000002	27.661000000000001	27.605699999999999	27.720700000000001	29.099699999999999	29.479299999999999	30.2285	31.860499999999998	33.211799999999997	32.524999999999999	33.786000000000001	33.718699999999998	35.406100000000002	35.231499999999997
P4_Y (G6)	G6	P4	SW620	F_1.5x	50	MM12	PY2_NarL-F.L.T	P4SW62050MM12	12.7667	13.463200000000001	14.514099999999999	13.693099999999999	15.351100000000001	14.638299999999999	16.186900000000001	17.469799999999999	17.393899999999999	19.286200000000001	18.7332	20.0685	20.2011	19.9786	21.366700000000002	21.6905	22.821000000000002	22.466100000000001	23.476700000000001		25.400200000000002	27.646999999999998	28.487400000000001	28.351800000000001	31.086500000000001	31.778600000000001	31.948499999999999	33.579799999999999	34.953600000000002	35.331499999999998	35.276400000000002	37.258699999999997	37.885899999999999	38.622700000000002	39.076599999999999	40.723199999999999	41.1873	42.3414	42.114400000000003	43.0182	43.850499999999997
P4_Y (G9)	G9	P4	SW620	F_1.5x	200	MM12	PY2_NarL-F.L.T	P4SW620200MM12	12.9299	14.523899999999999	14.821300000000001	14.3102	15.6371	15.8828	16.296099999999999	17.113700000000001	17.851299999999998	18.971	18.948499999999999	19.048100000000002	20.481300000000001	20.605799999999999	20.799199999999999	21.5168	22.8749	23.185700000000001	23.543099999999999		24.987200000000001	27.692399999999999	26.9664	29.5837	30.683800000000002	31.846900000000002	31.466999999999999	33.038400000000003	34.003999999999998	35.182200000000002	35.154400000000003	36.904600000000002	37.096600000000002	37.491500000000002	38.9422	39.884099999999997	40.509700000000002	40.795900000000003	41.368600000000001	42.847200000000001	43.198300000000003
P5_Y (B2)	B2	P5	SW620	F_1.5x	0	MM14	EF1a_HSVTK	P5SW6200MM14	14.386200000000001	15.3573	15.37655	17.130800000000001	17.296250000000001	17.046700000000001	18.501100000000001	18.521550000000001	19.634250000000002	19.74935	19.758500000000002	20.634499999999999	22.754950000000001	21.9438	22.422499999999999	22.764800000000001	23.7575	24.917249999999999	24.303000000000001		28.8309	28.989249999999998	30.056750000000001	30.757850000000001	32.409750000000003	34.473599999999998	35.717449999999999	35.429000000000002	37.037300000000002	36.725499999999997	38.857700000000001	37.988599999999998	40.426850000000002	40.247050000000002	40.741849999999999	40.692050000000002	42.173250000000003	42.552549999999997	43.813400000000001	44.808900000000001	44.200099999999999
P5_Y (B6)	B6	P5	SW620	F_1.5x	50	MM14	EF1a_HSVTK	P5SW62050MM14	11.883800000000001	13.437250000000001	15.05805	13.93825	15.19585	14.7646	15.925800000000001	15.86045	16.372499999999999	17.681950000000001	18.43695	18.411750000000001	19.611350000000002	18.842099999999999	20.768699999999999	21.939	22.333200000000001	22.192599999999999	23.469899999999999		25.2483	27.3261	26.697949999999999	28.18665	30.061450000000001	31.608599999999999	32.463900000000002	35.058300000000003	35.34545	36.239550000000001	37.207099999999997	37.75685	38.826900000000002	38.390599999999999	39.549149999999997	38.846550000000001	40.690550000000002	41.26135	41.872900000000001	42.277900000000002	42.746200000000002
P5_Y (B9)	B9	P5	SW620	F_1.5x	200	MM14	EF1a_HSVTK	P5SW620200MM14	11.08685	10.798	12.22	11.9237	12.817349999999999	12.927899999999999	14.290649999999999	13.6615	14.90555	16.488	16.884350000000001	15.591900000000001	16.840800000000002	17.495149999999999	18.77835	17.629249999999999	20.871500000000001	20.089849999999998	21.6967		24.484249999999999	24.475999999999999	25.19125	25.507249999999999	27.3216	28.255099999999999	29.711449999999999	31.488150000000001	32.375500000000002	32.066850000000002	33.356650000000002	34.294699999999999	35.223999999999997	36.192349999999998	36.793399999999998	36.427500000000002	37.237000000000002	38.019150000000003	38.850999999999999	39.814799999999998	39.329349999999998
P5_Y (C2)	C2	P5	SW620	F_1.5x	0	MM14	EF1a_HSVTK	P5SW6200MM14	17.836849999999998	18.835650000000001	19.281600000000001	18.975149999999999	18.947150000000001	18.919250000000002	20.626999999999999	20.548549999999999	21.846350000000001	23.85745	21.754049999999999	23.13185	23.526150000000001	26.026450000000001	25.759049999999998	27.082750000000001	26.4879	25.99765	26.900449999999999		30.145499999999998	32.136850000000003	33.297499999999999	34.12715	36.652050000000003	37.945149999999998	38.313249999999996	39.350250000000003	39.796799999999998	42.11195	41.79325	42.159399999999998	42.863149999999997	45.405900000000003	44.137749999999997	45.021299999999997	44.651350000000001	46.569450000000003	46.750349999999997	48.311700000000002	47.937399999999997
P5_Y (C6)	C6	P5	SW620	F_1.5x	50	MM14	EF1a_HSVTK	P5SW62050MM14	17.358250000000002	18.103549999999998	16.829699999999999	17.892800000000001	18.797049999999999	19.858149999999998	20.412849999999999	21.5547	22.2302	20.833200000000001	22.93375	22.561699999999998	24.999549999999999	24.671099999999999	23.659500000000001	25.875450000000001	26.61375	28.80405	27.071300000000001		30.3842	32.258650000000003	33.309449999999998	36.156599999999997	37.083449999999999	38.559699999999999	38.790300000000002	38.970750000000002	40.320250000000001	40.6464	42.984499999999997	43.1233	43.837400000000002	43.968850000000003	44.795850000000002	45.760399999999997	45.553699999999999	47.61515	48.108400000000003	48.776150000000001	48.513750000000002
P5_Y (C9)	C9	P5	SW620	F_1.5x	200	MM14	EF1a_HSVTK	P5SW620200MM14	15.0061	16.03295	16.661249999999999	15.864599999999999	15.7502	17.7667	17.775600000000001	18.578150000000001	18.37715	20.011700000000001	20.611999999999998	20.2196	22.53585	22.122150000000001	24.02205	24.665600000000001	23.69595	24.766300000000001	26.187449999999998		28.228000000000002	30.005800000000001	30.015650000000001	32.146349999999998	33.061	35.005899999999997	36.137700000000002	37.43665	38.035449999999997	38.228999999999999	38.091000000000001	39.855049999999999	39.458449999999999	40.30545	40.845700000000001	42.068199999999997	42.205750000000002	43.331850000000003	44.830649999999999	44.0304	44.30565
P5_Y (D2)	D2	P5	SW620	F_1.5x	0	MM14	EF1a_HSVTK	P5SW6200MM14	15.581849999999999	16.44125	16.976600000000001	16.767849999999999	16.904599999999999	19.027450000000002	17.872949999999999	20.673850000000002	18.831700000000001	19.660299999999999	19.4237	22.4846	23.10445	23.926600000000001	24.062249999999999	24.810700000000001	24.340800000000002	26.518699999999999	25.729600000000001		29.36035	30.722200000000001	30.329000000000001	32.78725	32.631500000000003	35.191549999999999	36.603299999999997	37.959850000000003	37.942799999999998	39.980800000000002	40.215699999999998	39.207999999999998	41.28125	41.041200000000003	43.488500000000002	42.288550000000001	43.415100000000002	44.385249999999999	43.910699999999999	45.195900000000002	46.476900000000001
P5_Y (D6)	D6	P5	SW620	F_1.5x	50	MM14	EF1a_HSVTK	P5SW62050MM14	16.7026	19.02495	19.63625	19.4834	20.00075	18.735050000000001	20.204699999999999	21.283799999999999	22.496549999999999	22.925049999999999	21.65485	24.3674	24.16525	24.48565	25.811399999999999	26.169049999999999	28.24475	28.608000000000001	30.8323		30.352550000000001	30.630700000000001	34.123049999999999	35.751649999999998	35.4739	38.527200000000001	38.548400000000001	40.212649999999996	41.698500000000003	42.58155	43.281599999999997	43.030749999999998	44.618899999999996	45.805799999999998	44.52525	46.203200000000002	47.385950000000001	47.546950000000002	47.868200000000002	48.3782	49.951349999999998
P5_Y (D9)	D9	P5	SW620	F_1.5x	200	MM14	EF1a_HSVTK	P5SW620200MM14	16.276700000000002	19.179099999999998	17.77675	18.896100000000001	20.207350000000002	19.00515	20.749649999999999	20.17285	22.41545	23.61655	22.329000000000001	24.222549999999998	24.045750000000002	25.036650000000002	26.944099999999999	26.827649999999998	28.204149999999998	27.214649999999999	27.989350000000002		30.76895	32.88165	34.718649999999997	35.000450000000001	35.5351	37.823450000000001	38.810749999999999	40.176549999999999	41.38635	42.336550000000003	42.357550000000003	43.370800000000003	43.237000000000002	44.2836	45.636749999999999	45.195749999999997	46.358800000000002	47.726700000000001	47.519199999999998	48.45675	49.630549999999999
P5_Y (E2)	E2	P5	SW620	F_1.5x	0	MM10	GFP	P5SW6200MM10	17.102650000000001	19.130849999999999	19.257000000000001	18.382549999999998	19.961749999999999	19.743849999999998	21.09965	21.149249999999999	20.0732	21.070350000000001	23.4679	22.2348	23.933450000000001	22.86495	23.656700000000001	24.071249999999999	25.6678	27.4131	26.994199999999999		28.6388	31.931799999999999	30.6815	33.51455	35.342399999999998	36.885849999999998	38.255049999999997	38.081099999999999	37.638300000000001	39.726349999999996	41.262700000000002	41.856050000000003	42.227400000000003	42.681649999999998	42.796100000000003	44.14575	44.359400000000001	43.401449999999997	46.5274	47.358350000000002	47.281300000000002
P5_Y (E6)	E6	P5	SW620	F_1.5x	50	MM10	GFP	P5SW62050MM10	18.53435	19.5063	18.6465	21.4268	21.023800000000001	21.390450000000001	22.088899999999999	23.10755	22.433350000000001	24.186250000000001	23.459599999999998	25.925899999999999	27.395700000000001	26.467449999999999	28.816949999999999	28.607500000000002	28.857150000000001	29.888200000000001	29.680900000000001		31.554349999999999	34.133049999999997	36.402250000000002	36.7515	38.681600000000003	41.638599999999997	40.746000000000002	43.297600000000003	43.234349999999999	42.825499999999998	45.034700000000001	44.53145	46.323	46.381700000000002	46.062750000000001	48.27375	49.17295	49.1571	50.400849999999998	51.528449999999999	50.745649999999998
P5_Y (E9)	E9	P5	SW620	F_1.5x	200	MM10	GFP	P5SW620200MM10	16.686499999999999	16.952449999999999	17.469200000000001	17.309999999999999	19.08155	18.391649999999998	20.65915	19.682749999999999	20.368749999999999	22.356549999999999	22.332149999999999	24.015450000000001	24.943899999999999	23.389800000000001	26.036999999999999	26.393899999999999	24.743649999999999	27.913550000000001	27.75695		30.515750000000001	32.133000000000003	33.666600000000003	34.16675	36.671199999999999	37.353099999999998	38.890999999999998	38.471600000000002	40.280250000000002	40.569899999999997	41.736400000000003	41.905799999999999	43.185899999999997	44.126449999999998	43.949599999999997	45.963999999999999	45.497750000000003	47.178800000000003	48.403399999999998	47.7577	49.282499999999999
P5_Y (F2)	F2	P5	SW620	F_1.5x	0	MM10	GFP	P5SW6200MM10	14.5174	16.565449999999998	17.74015	18.896450000000002	17.207750000000001	19.752800000000001	20.260200000000001	19.297650000000001	19.03425	21.469750000000001	21.771750000000001	21.850149999999999	24.013999999999999	23.527799999999999	24.7164	25.190799999999999	26.8627	26.959700000000002	26.402200000000001		29.145900000000001	31.02045	31.135950000000001	31.8628	34.241300000000003	36.637149999999998	37.9998	38.871450000000003	40.668050000000001	40.603000000000002	41.86365	42.294649999999997	42.592350000000003	43.960900000000002	42.930700000000002	44.556350000000002	45.47475	45.804499999999997	47.022350000000003	47.5779	49.378149999999998
P5_Y (F6)	F6	P5	SW620	F_1.5x	50	MM10	GFP	P5SW62050MM10	18.703600000000002	20.763850000000001	20.85145	19.991900000000001	21.14405	21.290849999999999	21.58905	24.427	24.415600000000001	25.583749999999998	25.06955	25.567299999999999	25.896799999999999	27.255849999999999	28.04655	29.700700000000001	30.394649999999999	29.208649999999999	32.034399999999998		32.904000000000003	34.954900000000002	36.136800000000001	38.730400000000003	38.134799999999998	39.689250000000001	41.483449999999998	42.976799999999997	44.7089	44.004649999999998	45.156700000000001	46.254350000000002	45.839199999999998	46.997250000000001	47.833150000000003	49.92915	49.482700000000001	51.029000000000003	52.33325	51.941499999999998	53.415500000000002
P5_Y (F9)	F9	P5	SW620	F_1.5x	200	MM10	GFP	P5SW620200MM10	18.142299999999999	19.192799999999998	19.1784	19.993649999999999	20.531849999999999	20.699850000000001	21.184249999999999	22.3996	21.975149999999999	22.037600000000001	23.679749999999999	23.5794	25.736699999999999	25.680050000000001	25.298500000000001	27.411799999999999	27.070250000000001	29.777550000000002	29.452349999999999		32.271349999999998	34.138849999999998	34.835349999999998	35.034350000000003	36.775700000000001	37.624000000000002	39.869199999999999	42.622999999999998	43.239150000000002	44.183549999999997	43.216949999999997	44.910200000000003	46.164200000000001	46.384149999999998	45.992550000000001	47.240400000000001	48.548000000000002	47.742249999999999	49.398850000000003	49.2727	52.119599999999998
P5_Y (G2)	G2	P5	SW620	F_1.5x	0	MM10	GFP	P5SW6200MM10	18.0992	20.68995	19.821549999999998	20.26755	20.81495	21.096450000000001	21.916699999999999	22.465599999999998	23.5764	23.084199999999999	24.529450000000001	24.867699999999999	25.294250000000002	26.063400000000001	27.361999999999998	27.707799999999999	27.79645	29.055399999999999	30.477350000000001		32.489800000000002	34.076000000000001	34.485849999999999	37.060699999999997	38.306199999999997	38.539749999999998	41.834899999999998	40.42445	40.904049999999998	42.109200000000001	42.941899999999997	45.211350000000003	44.023699999999998	46.077500000000001	46.186999999999998	48.084350000000001	48.574100000000001	48.660400000000003	50.0289	51.014299999999999	50.399900000000002
P5_Y (G6)	G6	P5	SW620	F_1.5x	50	MM10	GFP	P5SW62050MM10	18.93655	20.727399999999999	20.6435	20.921299999999999	21.366399999999999	22.003599999999999	22.602049999999998	23.712499999999999	24.720749999999999	25.795300000000001	24.684100000000001	25.9009	27.312650000000001	26.35425	26.521000000000001	28.259899999999998	28.18825	30.432549999999999	32.191600000000001		32.955150000000003	35.838299999999997	36.229799999999997	37.511049999999997	39.383450000000003	38.982300000000002	41.005299999999998	42.887549999999997	42.769449999999999	44.341700000000003	45.835250000000002	45.337649999999996	45.97925	46.622700000000002	47.648449999999997	48.215499999999999	48.458649999999999	49.474850000000004	49.879300000000001	51.023000000000003	52.0197
P5_Y (G9)	G9	P5	SW620	F_1.5x	200	MM10	GFP	P5SW620200MM10	21.948149999999998	22.950700000000001	23.4754	23.052800000000001	24.469100000000001	24.46575	24.847549999999998	24.344349999999999	27.294350000000001	26.15475	27.64095	27.55575	29.072199999999999	30.1509	30.301200000000001	31.449449999999999	31.021049999999999	33.650350000000003	33.020099999999999		35.088349999999998	36.196350000000002	38.890250000000002	39.050600000000003	41.625149999999998	42.061999999999998	44.105899999999998	43.858849999999997	45.09825	45.841000000000001	46.808900000000001	48.755200000000002	48.503349999999998	48.597450000000002	49.932099999999998	51.371499999999997	51.537199999999999	51.634799999999998	52.07835	52.471600000000002	54.903550000000003
[truncated: 145 more columns]
