# Supplementary material for: Synthetic gene circuits that selectively target RAS-driven cancers
Source: eLife. 2026 Feb 24;14:RP104320. doi: 10.7554/eLife.104320 (PMC12931925; doi:10.7554/eLife.104320)
Supplement: Figure 8—source data 2. [file elife-104320-fig8-data2.xlsx]

## Sheet: Sheet 1
Figure 8 - Source Data 2 | file with red fluorescence mCherry data from figure 8 used to create the figures. R scripts used for plotting are available on github (see data availability statement)
sample_id	Well	Plate	Cell_Line	Transfection	GCV	MM	Circuit	Identifier	0	1	2	3	4	5	6	7	8	9	10	11	12	13	14	15	16	17	18	19	21	22	23	24	25	26	27	28	29	30	31	32	33	34	35	36	37	38	39	40	41
P3_Y (E4)	E4	P3	HCT-116	F_0.5x	0	MM10	GFP	P3HCT-1160MM10	0	0	0	0	0	0	0	0	0	0	0	0	0	0	0	0	0	0	0		0	0	0	0	0	0	0	0	0	1.2449999999999999E-2	1.8849999999999999E-2	2.1149999999999999E-2	1.925E-2	6.3049999999999995E-2	9.8949999999999996E-2	0.10970000000000001	0.115	0.19539999999999999	0.21490000000000001	0.38159999999999999	0.56735000000000002
P3_Y (F4)	F4	P3	HCT-116	F_0.5x	0	MM10	GFP	P3HCT-1160MM10	0	0	0	0	0	0	0	0	0	0	0	0	0	0	0	0	0	0	0		0	6.9499999999999996E-3	0	7.2500000000000004E-3	1.5599999999999999E-2	2.1149999999999999E-2	6.0350000000000001E-2	9.0550000000000005E-2	0.104	0.15684999999999999	0.20799999999999999	0.28460000000000002	0.35885	0.45100000000000001	0.63190000000000002	0.75205	1.0143500000000001	1.2155	1.5401499999999999	1.90205	2.2519999999999998
P3_Y (G4)	G4	P3	HCT-116	F_0.5x	0	MM10	GFP	P3HCT-1160MM10	0	0	0	0	0	0	0	0	0	0	0	0	0	0	0	0	0	0	0		0	0	0	0	0	0	0	2.2200000000000001E-2	5.885E-2	6.4049999999999996E-2	9.3700000000000006E-2	0.13120000000000001	0.1709	0.24204999999999999	0.38019999999999998	0.48365000000000002	0.57040000000000002	0.74260000000000004	1.0016	1.2018	1.40635
P3_Y (E8)	E8	P3	HCT-116	F_0.5x	50	MM10	GFP	P3HCT-11650MM10	0	0	0	0	0	0	0	0	0	0	0	0	0	0	0	0	0	0	0		0	0	0	0	0	0	0	0	0	1.17E-2	5.1900000000000002E-2	0.12605	0.1842	0.26379999999999998	0.29885	0.36520000000000002	0.44929999999999998	0.65190000000000003	0.7006	0.92259999999999998	1.0987499999999999
P3_Y (F8)	F8	P3	HCT-116	F_0.5x	50	MM10	GFP	P3HCT-11650MM10	0	0	0	0	0	0	0	0	0	0	0	0	0	0	0	0	0	0	0		0	0	0	0	0	0	0	0	0	0	8.3000000000000001E-3	1.95E-2	5.0799999999999998E-2	6.9750000000000006E-2	0.10735	0.19295000000000001	0.28299999999999997	0.44095000000000001	0.56605000000000005	0.82650000000000001	1.16825
P3_Y (G8)	G8	P3	HCT-116	F_0.5x	50	MM10	GFP	P3HCT-11650MM10	0	0	0	0	0	0	0	0	0	0	0	0	0	0	0	0	0	0	0		0	0	0	0	0	0	1.61E-2	6.6650000000000001E-2	8.2250000000000004E-2	0.13925000000000001	0.21029999999999999	0.23285	0.3024	0.39629999999999999	0.55805000000000005	0.71265000000000001	0.92235	1.0951500000000001	1.3626	1.5904	1.8767499999999999
P3_Y (E11)	E11	P3	HCT-116	F_0.5x	200	MM10	GFP	P3HCT-116200MM10	9.1000000000000004E-3	7.4999999999999997E-3	7.9000000000000008E-3	7.1500000000000001E-3	7.45E-3	6.8500000000000002E-3	6.7999999999999996E-3	7.0499999999999998E-3	0	0	0	8.0999999999999996E-3	8.0499999999999999E-3	7.2500000000000004E-3	0	8.0999999999999996E-3	8.3999999999999995E-3	8.2000000000000007E-3	8.3499999999999998E-3		6.7000000000000002E-3	0	0	0	0	0	0	8.0999999999999996E-3	7.9500000000000005E-3	8.2000000000000007E-3	8.2500000000000004E-3	5.185E-2	8.5300000000000001E-2	0.12354999999999999	0.17860000000000001	0.26334999999999997	0.41835	0.57384999999999997	0.81664999999999999	1.03135	1.2865
P3_Y (F11)	F11	P3	HCT-116	F_0.5x	200	MM10	GFP	P3HCT-116200MM10	0	0	0	0	0	0	0	0	0	0	0	0	0	0	0	0	0	0	0		0	0	0	0	0	0	1.2800000000000001E-2	3.6049999999999999E-2	6.5299999999999997E-2	8.4000000000000005E-2	0.11695	0.15190000000000001	0.19825000000000001	0.24665000000000001	0.29104999999999998	0.35344999999999999	0.50495000000000001	0.63790000000000002	0.87155000000000005	1.0284	1.3550500000000001
P3_Y (G11)	G11	P3	HCT-116	F_0.5x	200	MM10	GFP	P3HCT-116200MM10	0	0	0	0	0	0	0	0	0	0	0	0	0	0	0	0	0	0	0		0	0	0	0	0	0	1.205E-2	1.3950000000000001E-2	2.93E-2	4.9500000000000002E-2	8.5699999999999998E-2	0.14044999999999999	0.22894999999999999	0.34960000000000002	0.44550000000000001	0.57665	0.7954	0.97114999999999996	1.2256	1.5146500000000001	1.7864500000000001
P2_Y (B4)	B4	P2	HCT-116	F_0.5x	0	MM11	EF1a_RAS-Sensor	P2HCT-1160MM11	1.1350000000000001E-2	7.4999999999999997E-3	8.0000000000000002E-3	8.9499999999999996E-3	9.7000000000000003E-3	9.2999999999999992E-3	9.1500000000000001E-3	9.0500000000000008E-3	8.2500000000000004E-3	8.2000000000000007E-3	1.0749999999999999E-2	9.9500000000000005E-3	1.17E-2	9.9000000000000008E-3	1.145E-2	9.9500000000000005E-3	9.75E-3	1.095E-2	1.01E-2	8.9499999999999996E-3	8.7500000000000008E-3	1.265E-2	1.35E-2	1.355E-2	1.29E-2	1.255E-2	2.2450000000000001E-2	3.175E-2	3.78E-2	4.4499999999999998E-2	6.6400000000000001E-2	9.0700000000000003E-2	0.11165	0.12670000000000001	0.11235000000000001	0.13980000000000001	0.21210000000000001	0.27765000000000001	0.40755000000000002	0.54659999999999997	0.66579999999999995
P2_Y (C4)	C4	P2	HCT-116	F_0.5x	0	MM11	EF1a_RAS-Sensor	P2HCT-1160MM11	1.0699999999999999E-2	9.1000000000000004E-3	1.0699999999999999E-2	1.06E-2	1.145E-2	1.09E-2	1.0200000000000001E-2	9.7000000000000003E-3	1.06E-2	9.5499999999999995E-3	1.38E-2	1.065E-2	9.2499999999999995E-3	8.6E-3	9.7000000000000003E-3	9.6500000000000006E-3	1.1900000000000001E-2	9.5499999999999995E-3	1.3599999999999999E-2	8.7500000000000008E-3	1.095E-2	1.925E-2	1.35E-2	1.9349999999999999E-2	1.32E-2	1.2749999999999999E-2	1.2500000000000001E-2	1.17E-2	1.685E-2	3.9149999999999997E-2	7.4349999999999999E-2	0.1246	0.22420000000000001	0.31209999999999999	0.38669999999999999	0.44740000000000002	0.54339999999999999	0.63324999999999998	0.71355000000000002	0.89859999999999995	1.1715500000000001
P2_Y (D4)	D4	P2	HCT-116	F_0.5x	0	MM11	EF1a_RAS-Sensor	P2HCT-1160MM11	1.2200000000000001E-2	1.235E-2	1.125E-2	0.01	2.5100000000000001E-2	2.53E-2	2.3050000000000001E-2	2.3550000000000001E-2	2.265E-2	2.2100000000000002E-2	2.1899999999999999E-2	2.0049999999999998E-2	2.1299999999999999E-2	1.7299999999999999E-2	1.5599999999999999E-2	1.7250000000000001E-2	1.635E-2	1.355E-2	1.315E-2	1.15E-2	1.125E-2	1.4749999999999999E-2	1.8100000000000002E-2	1.8200000000000001E-2	2.155E-2	2.2700000000000001E-2	3.6799999999999999E-2	5.0500000000000003E-2	6.0499999999999998E-2	8.5849999999999996E-2	0.10349999999999999	0.12734999999999999	0.21285000000000001	0.2581	0.31285000000000002	0.38955000000000001	0.52595000000000003	0.64510000000000001	0.81154999999999999	0.96409999999999996	1.1895
P2_Y (B8)	B8	P2	HCT-116	F_0.5x	50	MM11	EF1a_RAS-Sensor	P2HCT-11650MM11	1.21E-2	1.29E-2	1.4449999999999999E-2	1.66E-2	1.7149999999999999E-2	1.5949999999999999E-2	1.405E-2	1.47E-2	1.6049999999999998E-2	1.6650000000000002E-2	1.4500000000000001E-2	1.4200000000000001E-2	1.5100000000000001E-2	1.4500000000000001E-2	1.5699999999999999E-2	1.145E-2	1.4149999999999999E-2	1.455E-2	1.35E-2	1.295E-2	1.8849999999999999E-2	1.585E-2	1.3650000000000001E-2	1.61E-2	1.8149999999999999E-2	2.2249999999999999E-2	2.7E-2	4.5850000000000002E-2	5.1049999999999998E-2	8.2849999999999993E-2	0.13014999999999999	0.2051	0.2341	0.38595000000000002	0.51090000000000002	0.62585000000000002	0.88485000000000003	1.13795	1.4112	1.6561999999999999	1.9673
P2_Y (C8)	C8	P2	HCT-116	F_0.5x	50	MM11	EF1a_RAS-Sensor	P2HCT-11650MM11	1.1950000000000001E-2	1.34E-2	1.695E-2	1.2800000000000001E-2	1.6500000000000001E-2	1.46E-2	1.6799999999999999E-2	1.485E-2	1.515E-2	1.4149999999999999E-2	1.44E-2	1.405E-2	1.405E-2	1.38E-2	1.455E-2	1.5299999999999999E-2	1.5100000000000001E-2	1.43E-2	1.5900000000000001E-2	1.585E-2	1.61E-2	2.1000000000000001E-2	1.7049999999999999E-2	1.865E-2	1.915E-2	4.7849999999999997E-2	3.7199999999999997E-2	4.9299999999999997E-2	4.9549999999999997E-2	5.6849999999999998E-2	7.2749999999999995E-2	8.4900000000000003E-2	0.1197	0.15595000000000001	0.21115	0.27565000000000001	0.36654999999999999	0.4839	0.61294999999999999	0.77364999999999995	0.92164999999999997
P2_Y (D8)	D8	P2	HCT-116	F_0.5x	50	MM11	EF1a_RAS-Sensor	P2HCT-11650MM11	1.6449999999999999E-2	1.585E-2	2.6200000000000001E-2	2.5049999999999999E-2	2.4299999999999999E-2	2.24E-2	1.975E-2	2.1100000000000001E-2	1.9900000000000001E-2	1.9300000000000001E-2	2.0500000000000001E-2	1.8950000000000002E-2	1.77E-2	1.95E-2	1.6400000000000001E-2	1.695E-2	1.6899999999999998E-2	1.6799999999999999E-2	1.7000000000000001E-2	1.7600000000000001E-2	3.3300000000000003E-2	1.9349999999999999E-2	2.615E-2	2.385E-2	2.7949999999999999E-2	5.7149999999999999E-2	6.8949999999999997E-2	0.10165	0.13614999999999999	0.2228	0.3483	0.4239	0.50529999999999997	0.61770000000000003	0.75419999999999998	0.87695000000000001	1.0619499999999999	1.3519000000000001	1.50475	1.75475	2.0392999999999999
P2_Y (B11)	B11	P2	HCT-116	F_0.5x	200	MM11	EF1a_RAS-Sensor	P2HCT-116200MM11	1.175E-2	1.2149999999999999E-2	1.6400000000000001E-2	2.0650000000000002E-2	2.4199999999999999E-2	2.3800000000000002E-2	1.77E-2	2.155E-2	1.49E-2	1.9400000000000001E-2	1.54E-2	1.7999999999999999E-2	1.755E-2	1.435E-2	1.6400000000000001E-2	1.695E-2	1.7250000000000001E-2	1.485E-2	1.7850000000000001E-2	1.5599999999999999E-2	1.4200000000000001E-2	2.35E-2	1.9900000000000001E-2	1.685E-2	1.7899999999999999E-2	1.5350000000000001E-2	1.8450000000000001E-2	2.9399999999999999E-2	3.2300000000000002E-2	3.1800000000000002E-2	3.8249999999999999E-2	5.9200000000000003E-2	0.1016	0.12435	0.16435	0.192	0.27229999999999999	0.34815000000000002	0.49704999999999999	0.57330000000000003	0.76339999999999997
P2_Y (C11)	C11	P2	HCT-116	F_0.5x	200	MM11	EF1a_RAS-Sensor	P2HCT-116200MM11	1.0699999999999999E-2	1.345E-2	1.495E-2	1.3899999999999999E-2	1.44E-2	1.6650000000000002E-2	1.6799999999999999E-2	1.7850000000000001E-2	2.0299999999999999E-2	2.2550000000000001E-2	1.78E-2	0.02	2.0049999999999998E-2	2.4850000000000001E-2	1.5900000000000001E-2	2.1850000000000001E-2	1.8499999999999999E-2	2.0400000000000001E-2	1.9099999999999999E-2	1.515E-2	1.265E-2	1.5800000000000002E-2	2.5250000000000002E-2	1.9599999999999999E-2	1.865E-2	2.01E-2	1.6650000000000002E-2	2.0299999999999999E-2	1.6650000000000002E-2	2.35E-2	4.0349999999999997E-2	4.4350000000000001E-2	8.2949999999999996E-2	0.14230000000000001	0.18	0.18540000000000001	0.20465	0.29920000000000002	0.42570000000000002	0.52505000000000002	0.63460000000000005
P2_Y (D11)	D11	P2	HCT-116	F_0.5x	200	MM11	EF1a_RAS-Sensor	P2HCT-116200MM11	1.4149999999999999E-2	1.3849999999999999E-2	1.3100000000000001E-2	1.43E-2	1.6899999999999998E-2	1.515E-2	1.6E-2	2.0150000000000001E-2	1.5699999999999999E-2	1.7350000000000001E-2	1.44E-2	1.915E-2	1.43E-2	1.89E-2	1.49E-2	1.6049999999999998E-2	1.7600000000000001E-2	1.7250000000000001E-2	1.5900000000000001E-2	1.49E-2	1.355E-2	1.6199999999999999E-2	1.84E-2	1.7049999999999999E-2	1.67E-2	1.585E-2	1.4149999999999999E-2	1.5350000000000001E-2	1.9050000000000001E-2	1.72E-2	1.7850000000000001E-2	1.7250000000000001E-2	3.3399999999999999E-2	5.8549999999999998E-2	8.1600000000000006E-2	0.13105	0.19635	0.24199999999999999	0.33660000000000001	0.48554999999999998	0.62760000000000005
P2_Y (E4)	E4	P2	HCT-116	F_0.5x	0	MM12	PY2_NarL-F.L.T	P2HCT-1160MM12	1.17E-2	7.3000000000000001E-3	7.0000000000000001E-3	1.06E-2	9.4500000000000001E-3	1.025E-2	9.7000000000000003E-3	9.4999999999999998E-3	1.055E-2	1.0699999999999999E-2	0.01	1.0749999999999999E-2	1.1849999999999999E-2	1.205E-2	1.125E-2	1.095E-2	1.125E-2	1.01E-2	1.065E-2	1.2E-2	1.255E-2	1.355E-2	1.5949999999999999E-2	1.545E-2	3.2550000000000003E-2	3.4950000000000002E-2	4.58E-2	5.8299999999999998E-2	7.6850000000000002E-2	0.11890000000000001	0.15075	0.18645	0.23544999999999999	0.2676	0.32140000000000002	0.43559999999999999	0.53290000000000004	0.68735000000000002	0.87034999999999996	1.0549999999999999	1.3294999999999999
P2_Y (F4)	F4	P2	HCT-116	F_0.5x	0	MM12	PY2_NarL-F.L.T	P2HCT-1160MM12	1.12E-2	1.3100000000000001E-2	9.9500000000000005E-3	1.175E-2	1.555E-2	1.0749999999999999E-2	1.0749999999999999E-2	9.9500000000000005E-3	1.035E-2	9.2499999999999995E-3	1.1950000000000001E-2	1.03E-2	9.6500000000000006E-3	9.2999999999999992E-3	1.125E-2	8.8500000000000002E-3	1.005E-2	9.1000000000000004E-3	9.1500000000000001E-3	9.75E-3	1.21E-2	1.41E-2	1.6150000000000001E-2	1.515E-2	1.7000000000000001E-2	1.7999999999999999E-2	1.5949999999999999E-2	1.7500000000000002E-2	1.485E-2	2.1899999999999999E-2	2.5600000000000001E-2	3.4700000000000002E-2	2.7349999999999999E-2	4.1250000000000002E-2	4.675E-2	7.1849999999999997E-2	8.0100000000000005E-2	0.17055000000000001	0.3004	0.39040000000000002	0.53285000000000005
P2_Y (G4)	G4	P2	HCT-116	F_0.5x	0	MM12	PY2_NarL-F.L.T	P2HCT-1160MM12	1.2800000000000001E-2	7.9000000000000008E-3	1.095E-2	9.2499999999999995E-3	8.9999999999999993E-3	1.0699999999999999E-2	1.055E-2	1.3100000000000001E-2	9.9500000000000005E-3	1.005E-2	9.0500000000000008E-3	9.7000000000000003E-3	8.8500000000000002E-3	1.0800000000000001E-2	1.025E-2	9.1999999999999998E-3	1.0200000000000001E-2	9.4999999999999998E-3	9.4999999999999998E-3	8.6499999999999997E-3	1.12E-2	1.315E-2	1.205E-2	1.5800000000000002E-2	1.2449999999999999E-2	1.2449999999999999E-2	1.355E-2	4.9450000000000001E-2	9.1350000000000001E-2	0.126	0.1636	0.18454999999999999	0.21775	0.27395000000000003	0.30969999999999998	0.39150000000000001	0.51905000000000001	0.68354999999999999	0.90349999999999997	1.0802499999999999	1.2961499999999999
P2_Y (E8)	E8	P2	HCT-116	F_0.5x	50	MM12	PY2_NarL-F.L.T	P2HCT-11650MM12	1.2200000000000001E-2	1.2149999999999999E-2	1.1849999999999999E-2	1.7250000000000001E-2	2.0899999999999998E-2	1.6650000000000002E-2	1.345E-2	1.61E-2	1.37E-2	1.5650000000000001E-2	1.295E-2	1.78E-2	1.8100000000000002E-2	1.41E-2	1.32E-2	1.2200000000000001E-2	1.3650000000000001E-2	1.3650000000000001E-2	1.3100000000000001E-2	1.17E-2	1.525E-2	1.67E-2	1.6199999999999999E-2	1.72E-2	2.2700000000000001E-2	3.27E-2	4.8399999999999999E-2	6.4750000000000002E-2	7.8399999999999997E-2	0.1022	0.1484	0.17305000000000001	0.20710000000000001	0.25979999999999998	0.32579999999999998	0.37330000000000002	0.48154999999999998	0.63470000000000004	0.85019999999999996	1.04545	1.2350000000000001
P2_Y (F8)	F8	P2	HCT-116	F_0.5x	50	MM12	PY2_NarL-F.L.T	P2HCT-11650MM12	1.1650000000000001E-2	1.12E-2	1.2149999999999999E-2	1.43E-2	1.6299999999999999E-2	1.6449999999999999E-2	1.38E-2	1.5350000000000001E-2	1.495E-2	1.3650000000000001E-2	1.46E-2	1.5299999999999999E-2	1.5350000000000001E-2	1.34E-2	1.2699999999999999E-2	1.55E-2	1.4149999999999999E-2	1.32E-2	1.525E-2	1.635E-2	1.495E-2	1.5350000000000001E-2	2.1250000000000002E-2	2.2749999999999999E-2	2.1950000000000001E-2	2.2849999999999999E-2	2.23E-2	2.9350000000000001E-2	2.6950000000000002E-2	2.0750000000000001E-2	3.4950000000000002E-2	6.1499999999999999E-2	8.6550000000000002E-2	0.14699999999999999	0.22950000000000001	0.26200000000000001	0.35254999999999997	0.46084999999999998	0.56874999999999998	0.71850000000000003	0.89124999999999999
P2_Y (G8)	G8	P2	HCT-116	F_0.5x	50	MM12	PY2_NarL-F.L.T	P2HCT-11650MM12	1.1900000000000001E-2	1.0749999999999999E-2	1.1299999999999999E-2	1.915E-2	1.41E-2	1.5800000000000002E-2	1.37E-2	1.315E-2	1.24E-2	1.43E-2	1.38E-2	1.3899999999999999E-2	1.4800000000000001E-2	1.455E-2	1.5299999999999999E-2	1.44E-2	1.34E-2	1.4749999999999999E-2	1.37E-2	1.54E-2	1.6899999999999998E-2	1.465E-2	1.8200000000000001E-2	1.7749999999999998E-2	1.515E-2	2.64E-2	5.7250000000000002E-2	6.6900000000000001E-2	7.9049999999999995E-2	0.13335	0.18129999999999999	0.21595	0.2581	0.30885000000000001	0.38915	0.45365	0.57404999999999995	0.70794999999999997	0.84884999999999999	1.1194999999999999	1.2802
P2_Y (E11)	E11	P2	HCT-116	F_0.5x	200	MM12	PY2_NarL-F.L.T	P2HCT-116200MM12	1.315E-2	1.145E-2	1.34E-2	1.3899999999999999E-2	1.7049999999999999E-2	1.9400000000000001E-2	1.72E-2	1.6E-2	1.6899999999999998E-2	1.7950000000000001E-2	1.8200000000000001E-2	1.8499999999999999E-2	1.575E-2	1.5299999999999999E-2	1.9900000000000001E-2	1.6199999999999999E-2	1.6799999999999999E-2	1.7250000000000001E-2	1.575E-2	0.02	2.0650000000000002E-2	1.7350000000000001E-2	2.7400000000000001E-2	3.2050000000000002E-2	3.635E-2	5.0299999999999997E-2	5.3850000000000002E-2	6.3049999999999995E-2	6.8349999999999994E-2	6.9500000000000006E-2	8.2500000000000004E-2	9.2600000000000002E-2	0.10829999999999999	0.13084999999999999	0.19325000000000001	0.2253	0.3735	0.55020000000000002	0.83660000000000001	1.13845	1.42605
P2_Y (F11)	F11	P2	HCT-116	F_0.5x	200	MM12	PY2_NarL-F.L.T	P2HCT-116200MM12	1.065E-2	1.155E-2	1.265E-2	1.4800000000000001E-2	1.455E-2	1.3899999999999999E-2	1.6449999999999999E-2	1.49E-2	1.43E-2	1.7049999999999999E-2	1.6250000000000001E-2	1.46E-2	1.5100000000000001E-2	1.6049999999999998E-2	1.465E-2	1.5900000000000001E-2	1.485E-2	1.465E-2	1.4149999999999999E-2	1.5650000000000001E-2	1.455E-2	1.7299999999999999E-2	1.555E-2	1.5100000000000001E-2	1.685E-2	1.8749999999999999E-2	1.83E-2	2.0049999999999998E-2	1.67E-2	1.9400000000000001E-2	3.4750000000000003E-2	4.2799999999999998E-2	4.2950000000000002E-2	6.4949999999999994E-2	9.0450000000000003E-2	0.124	0.1565	0.18959999999999999	0.26545000000000002	0.40665000000000001	0.59950000000000003
P2_Y (G11)	G11	P2	HCT-116	F_0.5x	200	MM12	PY2_NarL-F.L.T	P2HCT-116200MM12	1.1650000000000001E-2	1.145E-2	1.2149999999999999E-2	1.355E-2	1.8550000000000001E-2	1.5650000000000001E-2	1.6299999999999999E-2	1.7950000000000001E-2	1.5900000000000001E-2	1.6449999999999999E-2	1.465E-2	1.465E-2	1.55E-2	1.55E-2	1.66E-2	1.485E-2	1.485E-2	1.44E-2	1.5100000000000001E-2	1.5699999999999999E-2	1.49E-2	1.7500000000000002E-2	1.8100000000000002E-2	1.95E-2	2.7699999999999999E-2	3.7150000000000002E-2	4.7399999999999998E-2	5.16E-2	8.3150000000000002E-2	0.10664999999999999	0.14954999999999999	0.21335000000000001	0.25240000000000001	0.31435000000000002	0.42470000000000002	0.52100000000000002	0.62334999999999996	0.72870000000000001	0.85424999999999995	0.93289999999999995	1.1144000000000001
P2_Y (A11)	A11	P2	HCT-116	F_0.5x	DMSO	MM13	Control	P2HCT-116DMSOMM13	1.095E-2	1.155E-2	1.29E-2	1.4149999999999999E-2	1.4149999999999999E-2	1.435E-2	1.4149999999999999E-2	1.7399999999999999E-2	1.575E-2	1.515E-2	1.6449999999999999E-2	1.44E-2	1.5599999999999999E-2	1.46E-2	1.4149999999999999E-2	1.47E-2	1.55E-2	1.515E-2	1.465E-2	1.5049999999999999E-2	1.265E-2	1.515E-2	1.3350000000000001E-2	1.465E-2	1.6299999999999999E-2	1.6299999999999999E-2	1.5049999999999999E-2	1.7350000000000001E-2	2.1000000000000001E-2	2.12E-2	4.07E-2	5.5649999999999998E-2	9.3100000000000002E-2	0.15104999999999999	0.22125	0.28999999999999998	0.44024999999999997	0.59665000000000001	0.69545000000000001	0.8397	0.96125000000000005
P2_Y (A8)	A8	P2	HCT-116	F_0.5x	pos.Ctrl	MM13	Control	P2HCT-116pos.CtrlMM13	9.9500000000000005E-3	1.025E-2	1.265E-2	1.295E-2	1.34E-2	1.4800000000000001E-2	1.2699999999999999E-2	1.485E-2	1.3299999999999999E-2	1.4449999999999999E-2	1.3100000000000001E-2	1.295E-2	1.3350000000000001E-2	1.3650000000000001E-2	1.295E-2	1.375E-2	1.4500000000000001E-2	1.315E-2	1.295E-2	1.2699999999999999E-2	1.145E-2	1.29E-2	1.17E-2	1.55E-2	1.5900000000000001E-2	3.2300000000000002E-2	3.755E-2	4.1599999999999998E-2	4.5650000000000003E-2	5.3150000000000003E-2	5.4449999999999998E-2	4.9200000000000001E-2	6.1600000000000002E-2	6.54E-2	8.2849999999999993E-2	8.7499999999999994E-2	0.1159	0.18275	0.18804999999999999	0.21625	0.24479999999999999
P2_Y (A4)	A4	P2	HCT-116	F_0.5x	Triton	MM13	Control	P2HCT-116TritonMM13	8.5000000000000006E-3	7.3000000000000001E-3	8.6999999999999994E-3	1.1350000000000001E-2	1.7950000000000001E-2	1.295E-2	1.1299999999999999E-2	1.3950000000000001E-2	1.2699999999999999E-2	9.4999999999999998E-3	1.255E-2	9.2999999999999992E-3	1.055E-2	7.8499999999999993E-3	7.7499999999999999E-3	8.0999999999999996E-3	8.8500000000000002E-3	1.1350000000000001E-2	8.2000000000000007E-3	7.7499999999999999E-3	8.1499999999999993E-3	1.12E-2	1.2200000000000001E-2	9.3500000000000007E-3	1.1900000000000001E-2	3.9750000000000001E-2	5.4399999999999997E-2	6.0299999999999999E-2	6.1449999999999998E-2	6.9400000000000003E-2	8.5949999999999999E-2	9.2249999999999999E-2	0.10895000000000001	0.11835	0.1333	0.14435000000000001	0.1532	0.20280000000000001	0.22835	0.33479999999999999	0.40155000000000002
P3_Y (B4)	B4	P3	HCT-116	F_0.5x	0	MM14	EF1a_HSVTK	P3HCT-1160MM14	0	0	0	0	0	0	0	0	0	0	0	0	0	0	0	0	0	0	0		0	0	0	0	0	8.8999999999999999E-3	0	8.6999999999999994E-3	1.1900000000000001E-2	7.0499999999999993E-2	8.4849999999999995E-2	0.16175	0.20485	0.28594999999999998	0.35599999999999998	0.49349999999999999	0.56130000000000002	0.74904999999999999	0.94299999999999995	1.1577	1.4333499999999999
P3_Y (C4)	C4	P3	HCT-116	F_0.5x	0	MM14	EF1a_HSVTK	P3HCT-1160MM14	0	0	0	0	0	0	0	0	0	0	0	0	0	0	0	0	0	0	0		0	0	0	0	0	0	7.9500000000000005E-3	2.725E-2	4.1000000000000002E-2	0.10215	0.1694	0.24590000000000001	0.37090000000000001	0.50475000000000003	0.65305000000000002	0.85645000000000004	1.01065	1.194	1.52295	1.8776999999999999	2.0383
P3_Y (D4)	D4	P3	HCT-116	F_0.5x	0	MM14	EF1a_HSVTK	P3HCT-1160MM14	0	0	0	0	0	0	0	0	0	0	0	0	0	0	0	0	0	0	0		0	0	0	0	0	1.9650000000000001E-2	3.1350000000000003E-2	6.9750000000000006E-2	9.4950000000000007E-2	0.12809999999999999	0.18920000000000001	0.24379999999999999	0.37995000000000001	0.4723	0.64059999999999995	0.83140000000000003	0.96555000000000002	1.3121499999999999	1.5177	1.7421500000000001	2.1184500000000002
P3_Y (B8)	B8	P3	HCT-116	F_0.5x	50	MM14	EF1a_HSVTK	P3HCT-11650MM14	0	0	0	0	0	0	0	0	0	0	0	0	0	0	0	0	0	0	0		0	0	0	0	0	2.1950000000000001E-2	2.2849999999999999E-2	5.2600000000000001E-2	8.9399999999999993E-2	0.14135	0.20865	0.24895	0.34620000000000001	0.39984999999999998	0.51405000000000001	0.58855000000000002	0.72850000000000004	0.80805000000000005	0.94410000000000005	1.0689500000000001	1.20825
P3_Y (C8)	C8	P3	HCT-116	F_0.5x	50	MM14	EF1a_HSVTK	P3HCT-11650MM14	0	0	0	0	0	0	0	0	0	0	0	0	0	0	0	0	0	0	0		0	0	0	0	0	0	1.805E-2	4.7649999999999998E-2	7.3150000000000007E-2	9.1450000000000004E-2	0.13800000000000001	0.20044999999999999	0.24554999999999999	0.37659999999999999	0.4234	0.52829999999999999	0.6542	0.95320000000000005	1.12225	1.3211999999999999	1.60805
P3_Y (D8)	D8	P3	HCT-116	F_0.5x	50	MM14	EF1a_HSVTK	P3HCT-11650MM14	0	0	0	0	0	0	0	0	0	0	0	0	0	0	0	0	0	0	0		0	0	0	0	8.3000000000000001E-3	1.41E-2	3.9449999999999999E-2	4.7100000000000003E-2	0.1177	0.17960000000000001	0.26429999999999998	0.35054999999999997	0.46234999999999998	0.55300000000000005	0.70315000000000005	0.85740000000000005	1.0482499999999999	1.1932499999999999	1.4823	1.9024000000000001	2.2533500000000002
P3_Y (B11)	B11	P3	HCT-116	F_0.5x	200	MM14	EF1a_HSVTK	P3HCT-116200MM14	0	0	0	0	0	0	0	0	0	0	0	0	0	0	0	0	0	0	0		0	0	0	0	0	2.845E-2	3.3250000000000002E-2	4.8349999999999997E-2	7.3150000000000007E-2	7.1650000000000005E-2	0.12005	0.20874999999999999	0.28804999999999997	0.35835	0.45100000000000001	0.62829999999999997	0.86934999999999996	1.0303500000000001	1.3253999999999999	1.60545	1.90265
P3_Y (C11)	C11	P3	HCT-116	F_0.5x	200	MM14	EF1a_HSVTK	P3HCT-116200MM14	0	0	0	0	0	0	0	0	0	0	0	0	0	0	0	0	0	0	0		0	0	0	0	9.1999999999999998E-3	1.5599999999999999E-2	3.3700000000000001E-2	6.4699999999999994E-2	0.11455	0.17660000000000001	0.21679999999999999	0.28599999999999998	0.38250000000000001	0.44774999999999998	0.54215000000000002	0.63690000000000002	0.77905000000000002	0.94089999999999996	1.2396499999999999	1.4236	1.7870999999999999
P3_Y (D11)	D11	P3	HCT-116	F_0.5x	200	MM14	EF1a_HSVTK	P3HCT-116200MM14	0	0	0	0	0	0	0	0	0	0	0	0	0	0	0	0	0	0	0		0	0	0	0	0	0	1.54E-2	4.1399999999999999E-2	7.0849999999999996E-2	0.11955	0.15140000000000001	0.24495	0.27315	0.34029999999999999	0.3926	0.46610000000000001	0.57040000000000002	0.66379999999999995	0.8095	1.0225500000000001	1.28735
P5_Y (E4)	E4	P5	HCT-116	F_1x	0	MM10	GFP	P5HCT-1160MM10	0	0	0	0	0	0	0	0	0	0	0	0	0	0	0	0	0	0	0		0	0	2.2499999999999998E-3	1.18E-2	4.0250000000000001E-2	9.4649999999999998E-2	0.1681	0.26064999999999999	0.36675000000000002	0.51315	0.77729999999999999	1.27945	1.8245	2.5143499999999999	3.4258999999999999	4.4790999999999999	5.7598000000000003	7.2451999999999996	8.7688000000000006	10.3682	12.230399999999999
P5_Y (F4)	F4	P5	HCT-116	F_1x	0	MM10	GFP	P5HCT-1160MM10	0	0	0	0	0	0	0	0	0	0	0	0	0	0	0	0	0	0	0		0	0	1.6549999999999999E-2	3.0700000000000002E-2	5.135E-2	8.2049999999999998E-2	0.1542	0.24729999999999999	0.35749999999999998	0.53220000000000001	0.77590000000000003	1.07805	1.5304	2.0514000000000001	2.7306499999999998	3.7410000000000001	5.0551000000000004	6.5407999999999999	8.1144999999999996	9.8108000000000004	11.39955
P5_Y (G4)	G4	P5	HCT-116	F_1x	0	MM10	GFP	P5HCT-1160MM10	5.7000000000000002E-3	2.5000000000000001E-3	2.2499999999999998E-3	5.1000000000000004E-3	2.7000000000000001E-3	3.5999999999999999E-3	3.2000000000000002E-3	4.6499999999999996E-3	4.8500000000000001E-3	3.65E-3	0	7.3000000000000001E-3	2.3999999999999998E-3	0	5.7999999999999996E-3	4.1999999999999997E-3	0	0	0		0	7.5500000000000003E-3	4.5999999999999999E-3	1.5900000000000001E-2	8.115E-2	0.1787	0.30285000000000001	0.44019999999999998	0.60409999999999997	0.75814999999999999	1.05725	1.3890499999999999	1.9116	2.5135000000000001	3.2593000000000001	4.0646500000000003	4.96305	6.0762999999999998	7.4716500000000003	8.7827999999999999	10.173400000000001
P5_Y (E8)	E8	P5	HCT-116	F_1x	50	MM10	GFP	P5HCT-11650MM10	0	0	0	0	0	0	0	0	0	0	0	0	0	0	0	0	0	0	0		0	0	0	1.83E-2	3.6400000000000002E-2	5.6000000000000001E-2	9.2350000000000002E-2	0.15565000000000001	0.23569999999999999	0.42204999999999998	0.65759999999999996	0.96009999999999995	1.62155	2.3159000000000001	3.2376499999999999	4.5418000000000003	6.0004	7.4919000000000002	9.0927500000000006	11.0078	12.998200000000001
P5_Y (F8)	F8	P5	HCT-116	F_1x	50	MM10	GFP	P5HCT-11650MM10	0	0	0	0	0	0	0	0	0	0	0	0	4.9500000000000004E-3	7.45E-3	9.0500000000000008E-3	6.7999999999999996E-3	6.1999999999999998E-3	6.45E-3	6.9499999999999996E-3		0	0	0	2.3E-3	1.495E-2	3.705E-2	8.4949999999999998E-2	0.19184999999999999	0.29204999999999998	0.432	0.58565	0.91315000000000002	1.3630500000000001	1.9959	2.75535	3.6791	4.8827499999999997	6.3295000000000003	7.9797500000000001	9.8341999999999992	11.735900000000001
P5_Y (G8)	G8	P5	HCT-116	F_1x	50	MM10	GFP	P5HCT-11650MM10	0	0	0	0	0	0	0	0	0	0	0	0	0	0	0	0	0	0	0		0	0	0	2.5500000000000002E-3	1.2699999999999999E-2	3.2800000000000003E-2	9.3299999999999994E-2	0.20150000000000001	0.29704999999999998	0.43459999999999999	0.60870000000000002	0.89654999999999996	1.3158000000000001	1.7265999999999999	2.3609499999999999	3.23	4.1360000000000001	5.2492000000000001	6.3572499999999996	7.7081499999999998	8.8675999999999995
P5_Y (E11)	E11	P5	HCT-116	F_1x	200	MM10	GFP	P5HCT-116200MM10	0	0	0	0	0	0	0	0	0	0	0	0	0	0	0	0	0	0	0		0	0	0	1.1299999999999999E-2	6.59E-2	0.15615000000000001	0.28065000000000001	0.41825000000000001	0.58355000000000001	0.78439999999999999	1.0327500000000001	1.4026000000000001	1.8813500000000001	2.53315	3.2628499999999998	4.0278	4.9971500000000004	5.9124999999999996	6.9726499999999998	8.1936499999999999	9.6493000000000002
P5_Y (F11)	F11	P5	HCT-116	F_1x	200	MM10	GFP	P5HCT-116200MM10	0	0	0	0	0	0	0	0	0	0	0	0	0	0	0	0	0	0	0		1.8950000000000002E-2	1.6299999999999999E-2	1.3299999999999999E-2	1.4449999999999999E-2	1.355E-2	1.4749999999999999E-2	2.2599999999999999E-2	4.8300000000000003E-2	7.2499999999999995E-2	0.1203	0.22345000000000001	0.45219999999999999	0.80210000000000004	1.2968999999999999	1.97295	2.6972999999999998	3.6145999999999998	4.6484500000000004	5.7964500000000001	6.9992999999999999	8.1994500000000006
P5_Y (G11)	G11	P5	HCT-116	F_1x	200	MM10	GFP	P5HCT-116200MM10	0	0	0	0	0	0	0	0	0	0	0	0	0	0	0	0	0	0	0		0	0	4.3499999999999997E-3	0.01	2.775E-2	5.6500000000000002E-2	0.12465	0.22439999999999999	0.35525000000000001	0.54744999999999999	0.76995000000000002	1.0423	1.4921500000000001	1.9027499999999999	2.4677500000000001	3.1487500000000002	3.9968499999999998	4.9364499999999998	5.8765000000000001	6.8845499999999999	7.7983000000000002
P4_Y (B4)	B4	P4	HCT-116	F_1x	0	MM11	EF1a_RAS-Sensor	P4HCT-1160MM11	0	0	0	0	0	0	0	0	0	0	0	0	0	4.4000000000000003E-3	0	0	0	0	0		0	0	8.6999999999999994E-3	2.7400000000000001E-2	4.0899999999999999E-2	8.1500000000000003E-2	0.21229999999999999	0.35070000000000001	0.58050000000000002	0.84189999999999998	1.1377999999999999	1.5484	2.0527000000000002	2.7944	3.5044	4.2352999999999996	4.7358000000000002	5.5083000000000002	6.1010999999999997	7.0190999999999999	7.8766999999999996
P4_Y (C4)	C4	P4	HCT-116	F_1x	0	MM11	EF1a_RAS-Sensor	P4HCT-1160MM11	4.3E-3	0	0	0	0	6.3E-3	4.4999999999999997E-3	5.4999999999999997E-3	4.4999999999999997E-3	4.7999999999999996E-3	0	6.0000000000000001E-3	0	1.2699999999999999E-2	1.2699999999999999E-2	9.1999999999999998E-3	1.37E-2	1.34E-2	2.9399999999999999E-2		1.7999999999999999E-2	0	0	1.34E-2	2.7400000000000001E-2	0.1065	0.19789999999999999	0.24260000000000001	0.37819999999999998	0.56310000000000004	0.83030000000000004	1.1828000000000001	1.5976999999999999	2.0771999999999999	2.6301999999999999	3.4060999999999999	4.3559000000000001	5.3011999999999997	6.5785999999999998	7.4740000000000002	8.5020000000000007
P4_Y (D4)	D4	P4	HCT-116	F_1x	0	MM11	EF1a_RAS-Sensor	P4HCT-1160MM11	0	0	0	0	0	0	0	0	0	0	0	0	0	0	0	0	0	0	0		0	0	5.4999999999999997E-3	2.8400000000000002E-2	7.22E-2	0.1051	0.1893	0.32090000000000002	0.49220000000000003	0.69650000000000001	0.92500000000000004	1.3513999999999999	1.8409	2.5596000000000001	3.5425	4.5812999999999997	5.6207000000000003	6.8159000000000001	8.0930999999999997	9.9200999999999997	11.25
P4_Y (B8)	B8	P4	HCT-116	F_1x	50	MM11	EF1a_RAS-Sensor	P4HCT-11650MM11	0	0	0	0	0	0	0	0	0	0	0	0	0	0	0	0	0	0	0		0	0	0	0	6.1699999999999998E-2	0.1822	0.26340000000000002	0.43340000000000001	0.67430000000000001	0.91620000000000001	1.1341000000000001	1.4339999999999999	1.6891	2.2955000000000001	2.9188000000000001	3.5472999999999999	4.0404999999999998	4.7191000000000001	5.5804	6.3113999999999999	7.1516999999999999
P4_Y (C8)	C8	P4	HCT-116	F_1x	50	MM11	EF1a_RAS-Sensor	P4HCT-11650MM11	0	0	0	0	0	0	0	0	0	0	0	0	0	0	0	0	0	0	0		0	0	5.3E-3	1.9E-2	7.6700000000000004E-2	0.19020000000000001	0.33560000000000001	0.52180000000000004	0.66790000000000005	0.89100000000000001	1.1716	1.5845	2.0968	2.6105999999999998	3.2374000000000001	3.9897	4.7183999999999999	5.5282999999999998	6.4386000000000001	7.3551000000000002	8.1963000000000008
P4_Y (D8)	D8	P4	HCT-116	F_1x	50	MM11	EF1a_RAS-Sensor	P4HCT-11650MM11	0	0	0	0	0	0	0	0	0	0	0	0	0	0	0	0	0	0	0		0	0	0	4.41E-2	0.11840000000000001	0.29609999999999997	0.51280000000000003	0.77569999999999995	1.0561	1.4943	2.0956000000000001	2.5762	3.3759999999999999	4.2484999999999999	5.2240000000000002	6.0989000000000004	7.4741999999999997	8.8737999999999992	10.3843	12.1248	13.769299999999999
P4_Y (B11)	B11	P4	HCT-116	F_1x	200	MM11	EF1a_RAS-Sensor	P4HCT-116200MM11	0	0	0	0	0	0	0	0	0	0	0	0	0	0	0	0	0	0	0		0	0	0	8.2000000000000007E-3	3.6900000000000002E-2	0.13719999999999999	0.2097	0.28349999999999997	0.46400000000000002	0.61839999999999995	0.84619999999999995	1.0814999999999999	1.3818999999999999	1.7979000000000001	2.2845	2.9863	3.6172	4.6280000000000001	5.5674000000000001	6.6409000000000002	7.7210999999999999
P4_Y (C11)	C11	P4	HCT-116	F_1x	200	MM11	EF1a_RAS-Sensor	P4HCT-116200MM11	0	0	0	0	0	0	0	0	0	0	0	0	0	0	0	0	0	0	0		0	0	0	2.5399999999999999E-2	5.6899999999999999E-2	0.115	0.17979999999999999	0.24990000000000001	0.41660000000000003	0.60819999999999996	0.86560000000000004	1.1132	1.4794	1.8942000000000001	2.3628	2.9758	3.5954999999999999	4.5831999999999997	5.3124000000000002	6.0755999999999997	7.0007000000000001
P4_Y (D11)	D11	P4	HCT-116	F_1x	200	MM11	EF1a_RAS-Sensor	P4HCT-116200MM11	0	0	0	0	0	0	0	0	0	0	0	0	0	0	0	0	0	0	0		0	0	0	0	0	0	4.1099999999999998E-2	7.0400000000000004E-2	0.11070000000000001	0.2049	0.33879999999999999	0.57240000000000002	0.95679999999999998	1.5057	2.0619999999999998	2.7168999999999999	3.4213	4.3009000000000004	5.0406000000000004	5.8136999999999999	6.7774999999999999
P4_Y (E4)	E4	P4	HCT-116	F_1x	0	MM12	PY2_NarL-F.L.T	P4HCT-1160MM12	0	0	0	0	0	0	0	0	0	0	0	0	0	0	0	0	0	0	0		0	0	0	0	3.39E-2	9.5799999999999996E-2	0.1726	0.31669999999999998	0.49519999999999997	0.81699999999999995	1.2185999999999999	1.6956	2.3546999999999998	3.1640000000000001	3.9887000000000001	4.8433000000000002	5.7742000000000004	6.8376000000000001	7.8975999999999997	9.3946000000000005	11.0008
P4_Y (F4)	F4	P4	HCT-116	F_1x	0	MM12	PY2_NarL-F.L.T	P4HCT-1160MM12	0	0	0	0	0	0	0	0	0	0	0	0	0	0	0	0	0	0	0		0	0	0	1.09E-2	7.2999999999999995E-2	0.13270000000000001	0.19839999999999999	0.26140000000000002	0.3861	0.55510000000000004	0.80320000000000003	1.1922999999999999	1.6687000000000001	2.3129	3.0145	3.8896000000000002	4.9237000000000002	6.1782000000000004	7.5911	8.7401999999999997	10.0884
P4_Y (G4)	G4	P4	HCT-116	F_1x	0	MM12	PY2_NarL-F.L.T	P4HCT-1160MM12	0	0	0	0	0	0	0	0	0	0	0	0	0	0	0	0	0	0	0		4.65E-2	5.96E-2	1.9099999999999999E-2	2.8400000000000002E-2	6.5000000000000002E-2	0.1052	0.192	0.33169999999999999	0.4194	0.52869999999999995	0.67769999999999997	0.89490000000000003	1.1902999999999999	1.6184000000000001	2.2309999999999999	2.8489	3.5636999999999999	4.3516000000000004	5.2328000000000001	6.2401	7.2207999999999997
P4_Y (E8)	E8	P4	HCT-116	F_1x	50	MM12	PY2_NarL-F.L.T	P4HCT-11650MM12	0	0	0	0	0	0	0	0	0	0	0	0	0	0	0	0	0	0	0		0	0	0	3.5799999999999998E-2	6.7799999999999999E-2	0.15770000000000001	0.24859999999999999	0.40860000000000002	0.58560000000000001	0.83079999999999998	1.1831	1.6211	2.0979999999999999	2.8805000000000001	3.7568000000000001	4.6203000000000003	5.6742999999999997	7.1412000000000004	8.5940999999999992	10.0426	11.4094
P4_Y (F8)	F8	P4	HCT-116	F_1x	50	MM12	PY2_NarL-F.L.T	P4HCT-11650MM12	0	0	0	0	0	0	0	0	0	0	0	0	0	0	0	0	0	0	0		0	0	0	0	2.7900000000000001E-2	2.9499999999999998E-2	4.7300000000000002E-2	8.9300000000000004E-2	0.1699	0.31090000000000001	0.61899999999999999	1.0743	1.6766000000000001	2.2610999999999999	3.1726999999999999	4.1666999999999996	5.3087999999999997	6.5712000000000002	7.9764999999999997	9.3981999999999992	10.809900000000001
P4_Y (G8)	G8	P4	HCT-116	F_1x	50	MM12	PY2_NarL-F.L.T	P4HCT-11650MM12	0	0	0	0	0	0	0	0	0	0	0	0	0	0	0	0	0	0	0		0	0	0	2.1100000000000001E-2	3.6999999999999998E-2	3.7199999999999997E-2	5.5899999999999998E-2	9.5699999999999993E-2	0.159	0.1968	0.25990000000000002	0.43230000000000002	0.67310000000000003	0.98099999999999998	1.5179	2.0956000000000001	2.7389000000000001	3.5339999999999998	4.3426999999999998	5.2221000000000002	6.0914000000000001
P4_Y (E11)	E11	P4	HCT-116	F_1x	200	MM12	PY2_NarL-F.L.T	P4HCT-116200MM12	0	0	0	0	0	0	0	0	0	0	0	0	0	0	0	0	0	0	0		0	0	0	0	2.0799999999999999E-2	4.5999999999999999E-2	9.8299999999999998E-2	0.13769999999999999	0.2097	0.3533	0.52170000000000005	0.84589999999999999	1.0541	1.4674	1.9510000000000001	2.5057	3.0914999999999999	3.6303000000000001	4.2901999999999996	4.9768999999999997	5.7370000000000001
P4_Y (F11)	F11	P4	HCT-116	F_1x	200	MM12	PY2_NarL-F.L.T	P4HCT-116200MM12	0	0	0	0	0	0	0	0	0	0	0	0	0	0	0	0	0	0	0		0	0	0	0	0	2.7099999999999999E-2	3.9300000000000002E-2	5.5899999999999998E-2	8.5099999999999995E-2	0.18240000000000001	0.29699999999999999	0.52500000000000002	0.87419999999999998	1.3658999999999999	1.8606	2.2519999999999998	2.8851	3.6244999999999998	4.4866999999999999	5.4032	6.2987000000000002
P4_Y (G11)	G11	P4	HCT-116	F_1x	200	MM12	PY2_NarL-F.L.T	P4HCT-116200MM12	0	0	5.1000000000000004E-3	5.1000000000000004E-3	0	0	0	0	0	0	0	0	0	0	0	0	0	0	0		0	0	0	0	1.3100000000000001E-2	6.7699999999999996E-2	0.1371	0.2074	0.28449999999999998	0.41949999999999998	0.55179999999999996	0.82730000000000004	1.1436999999999999	1.5271999999999999	2.0152999999999999	2.4108000000000001	2.9409000000000001	3.5390000000000001	4.3240999999999996	5.0777000000000001	5.6993
P4_Y (A11)	A11	P4	HCT-116	F_1x	DMSO	MM13	Control	P4HCT-116DMSOMM13	0	0	0	0	0	0	0	0	0	0	0	0	0	0	0	0	0	0	0		0	0	0	0	1.5299999999999999E-2	5.8599999999999999E-2	8.5800000000000001E-2	0.12130000000000001	0.15359999999999999	0.193	0.31390000000000001	0.41	0.60319999999999996	0.86509999999999998	1.1860999999999999	1.5891	1.9697	2.3336999999999999	2.7450000000000001	3.2242000000000002	3.4988000000000001
P4_Y (A8)	A8	P4	HCT-116	F_1x	pos.Ctrl	MM13	Control	P4HCT-116pos.CtrlMM13	1.37E-2	0	0	0	0	0	0	0	0	0	0	0	0	0	0	0	0	0	0		0	0	0	1.3899999999999999E-2	6.4699999999999994E-2	0.16289999999999999	0.24179999999999999	0.35020000000000001	0.44469999999999998	0.59740000000000004	0.76429999999999998	0.92259999999999998	1.1724000000000001	1.4608000000000001	1.8548	2.2069999999999999	2.6172	3.0941999999999998	3.6044999999999998	4.1398999999999999	4.5095000000000001
P4_Y (A4)	A4	P4	HCT-116	F_1x	Triton	MM13	Control	P4HCT-116TritonMM13	0	0	0	0	0	0	0	0	0	0	0	0	0	0	0	0	0	0	0		0	0	0	0	1.0800000000000001E-2	3.6299999999999999E-2	4.8500000000000001E-2	5.6800000000000003E-2	9.4299999999999995E-2	0.14249999999999999	0.2167	0.37640000000000001	0.66069999999999995	1.0233000000000001	1.4661	1.9306000000000001	2.4117999999999999	2.8016000000000001	3.3199000000000001	3.8632	4.5518000000000001
P5_Y (B4)	B4	P5	HCT-116	F_1x	0	MM14	EF1a_HSVTK	P5HCT-1160MM14	2.3E-3	2.3999999999999998E-3	0	0	0	0	0	3.2499999999999999E-3	0	5.7000000000000002E-3	6.1999999999999998E-3	3.7499999999999999E-3	0	6.0499999999999998E-3	6.4000000000000003E-3	6.1000000000000004E-3	5.9500000000000004E-3	6.3E-3	3.3999999999999998E-3		2.8999999999999998E-3	2.5000000000000001E-3	0	2.1600000000000001E-2	8.8700000000000001E-2	0.23724999999999999	0.41985	0.62955000000000005	0.92444999999999999	1.2573000000000001	1.67005	2.1618499999999998	2.8697499999999998	3.5539499999999999	4.4998500000000003	5.4347500000000002	6.5972999999999997	7.7428999999999997	9.0805500000000006	10.52	12.02075
P5_Y (C4)	C4	P5	HCT-116	F_1x	0	MM14	EF1a_HSVTK	P5HCT-1160MM14	2.2000000000000001E-3	0	4.0000000000000001E-3	0	2.5500000000000002E-3	4.7000000000000002E-3	3.5000000000000001E-3	2.8500000000000001E-3	2.3E-3	2.3999999999999998E-3	4.5999999999999999E-3	4.15E-3	7.0499999999999998E-3	8.2000000000000007E-3	8.1499999999999993E-3	5.1999999999999998E-3	3.4499999999999999E-3	4.15E-3	7.6E-3		0	3.3999999999999998E-3	7.0499999999999998E-3	2.325E-2	6.4000000000000001E-2	0.1419	0.25	0.46310000000000001	0.80289999999999995	1.2415	1.76955	2.3955000000000002	3.1071	4.08005	5.1084500000000004	6.4431000000000003	7.8824500000000004	9.6666500000000006	11.344200000000001	13.289899999999999	15.176450000000001
P5_Y (D4)	D4	P5	HCT-116	F_1x	0	MM14	EF1a_HSVTK	P5HCT-1160MM14	0	0	0	0	0	0	0	0	0	0	0	0	0	0	0	0	0	0	0		0	0	1.005E-2	3.125E-2	5.57E-2	8.8150000000000006E-2	0.13455	0.22505	0.39610000000000001	0.71935000000000004	1.1507499999999999	1.6497999999999999	2.2875000000000001	3.0812499999999998	3.8927499999999999	4.9370000000000003	5.9886499999999998	7.3135000000000003	8.89	10.81155	12.78345
P5_Y (B8)	B8	P5	HCT-116	F_1x	50	MM14	EF1a_HSVTK	P5HCT-11650MM14	0	0	0	0	0	0	0	0	0	0	0	0	0	0	0	0	0	0	0		0	0	0	3.245E-2	9.6600000000000005E-2	0.27810000000000001	0.47370000000000001	0.69335000000000002	1.0139	1.4049499999999999	1.8167	2.2628499999999998	2.8551000000000002	3.6097000000000001	4.4282000000000004	5.41465	6.3806000000000003	7.4831500000000002	8.7636000000000003	9.9708000000000006	11.30045
P5_Y (C8)	C8	P5	HCT-116	F_1x	50	MM14	EF1a_HSVTK	P5HCT-11650MM14	0	0	0	0	0	0	0	0	0	0	0	0	0	0	0	0	0	0	2.3E-3		0	0	0	2.8999999999999998E-3	5.4300000000000001E-2	0.16089999999999999	0.34684999999999999	0.54464999999999997	0.74724999999999997	0.98229999999999995	1.4032500000000001	1.8412999999999999	2.7086000000000001	3.6955499999999999	4.8046499999999996	5.9775499999999999	7.4841499999999996	8.8510500000000008	10.430249999999999	12.129300000000001	13.9483
P5_Y (D8)	D8	P5	HCT-116	F_1x	50	MM14	EF1a_HSVTK	P5HCT-11650MM14	0	0	0	0	0	0	0	0	0	0	0	0	0	0	0	0	0	0	0		0	0	8.6E-3	1.7299999999999999E-2	5.2299999999999999E-2	0.14185	0.2535	0.42695	0.67900000000000005	1.02905	1.4113	1.9452499999999999	2.5716000000000001	3.4930500000000002	4.6579499999999996	5.9099000000000004	7.2635500000000004	8.7471499999999995	10.400600000000001	12.25685	14.230499999999999
P5_Y (B11)	B11	P5	HCT-116	F_1x	200	MM14	EF1a_HSVTK	P5HCT-116200MM14	0	0	0	0	0	0	0	0	0	0	0	0	0	0	0	0	0	0	0		0	0	0	2.3949999999999999E-2	0.12575	0.17374999999999999	0.30259999999999998	0.43535000000000001	0.62080000000000002	0.82784999999999997	1.08585	1.44095	1.9059999999999999	2.4848499999999998	3.31345	4.3105500000000001	5.33195	6.4933500000000004	7.6680999999999999	8.9619	10.42435
P5_Y (C11)	C11	P5	HCT-116	F_1x	200	MM14	EF1a_HSVTK	P5HCT-116200MM14	5.6499999999999996E-3	3.3999999999999998E-3	2.7499999999999998E-3	3.0000000000000001E-3	0	0	0	2.3E-3	2.2000000000000001E-3	0	2.4499999999999999E-3	2.65E-3	2.3E-3	0	2.7000000000000001E-3	2.35E-2	2.4499999999999999E-3	0	0		2.5000000000000001E-3	2.5000000000000001E-3	6.45E-3	1.1849999999999999E-2	1.7100000000000001E-2	3.39E-2	6.2899999999999998E-2	0.12435	0.25445000000000001	0.40044999999999997	0.66810000000000003	1.028	1.5201	2.1773500000000001	2.9470000000000001	3.7911999999999999	4.8046499999999996	5.8024500000000003	6.8810000000000002	8.0927500000000006	9.2166999999999994
P5_Y (D11)	D11	P5	HCT-116	F_1x	200	MM14	EF1a_HSVTK	P5HCT-116200MM14	0	0	0	0	0	0	0	0	0	0	0	0	0	0	0	0	0	0	0		0	0	0	9.0500000000000008E-3	3.635E-2	0.11615	0.19084999999999999	0.29360000000000003	0.4637	0.66264999999999996	1.04125	1.4837499999999999	2.14615	2.8619500000000002	3.7624499999999999	4.6478999999999999	5.8388	7.0994999999999999	8.4396000000000004	9.7804000000000002	11.23415
P3_Y (E3)	E3	P3	Igrov-1	F_1x	0	MM10	GFP	P3Igrov-10MM10	6.9499999999999996E-3	0	0	0	0	0	0	0	0	0	0	0	0	0	0	0	0	0	0		0	0	0	0	1.125E-2	2.1649999999999999E-2	1.495E-2	2.2550000000000001E-2	1.7850000000000001E-2	1.9199999999999998E-2	2.2550000000000001E-2	1.9400000000000001E-2	3.075E-2	2.5149999999999999E-2	2.3550000000000001E-2	2.87E-2	2.0500000000000001E-2	4.2849999999999999E-2	9.5399999999999999E-2	0.16644999999999999	0.2402
P3_Y (F3)	F3	P3	Igrov-1	F_1x	0	MM10	GFP	P3Igrov-10MM10	0	0	0	0	0	0	0	0	0	0	0	0	0	0	0	0	0	0	0		0	0	0	0	0	0	0	0	0	0	0	0	0	8.9499999999999996E-3	1.78E-2	4.8599999999999997E-2	0.1283	0.17605000000000001	0.24825	0.29449999999999998	0.30919999999999997
P3_Y (G3)	G3	P3	Igrov-1	F_1x	0	MM10	GFP	P3Igrov-10MM10	0	0	0	0	0	0	0	0	0	0	0	0	0	0	0	0	0	0	0		0	0	0	0	0	0	0	0	0	0	1.6449999999999999E-2	2.6599999999999999E-2	2.9149999999999999E-2	2.385E-2	5.9450000000000003E-2	0.25895000000000001	0.34649999999999997	0.38950000000000001	0.47899999999999998	0.63290000000000002	0.78879999999999995
P3_Y (E7)	E7	P3	Igrov-1	F_1x	50	MM10	GFP	P3Igrov-150MM10	0	0	0	0	0	0	0	0	0	0	0	0	0	0	0	0	0	0	0		0	0	0	0	0	0	0	0	0	0	0	0	0	0	7.45E-3	2.2700000000000001E-2	2.4549999999999999E-2	5.1200000000000002E-2	8.7400000000000005E-2	0.1656	0.24575
P3_Y (F7)	F7	P3	Igrov-1	F_1x	50	MM10	GFP	P3Igrov-150MM10	0	0	0	0	0	0	0	0	0	0	0	0	0	0	0	0	0	0	0		0	0	0	0	7.0499999999999998E-3	0	0	0	0	0	0	1.8350000000000002E-2	3.2000000000000001E-2	2.6800000000000001E-2	1.9099999999999999E-2	3.1449999999999999E-2	4.9149999999999999E-2	7.3099999999999998E-2	7.5950000000000004E-2	0.16309999999999999	0.16335
P3_Y (G7)	G7	P3	Igrov-1	F_1x	50	MM10	GFP	P3Igrov-150MM10	0	0	0	0	0	0	0	0	0	0	0	0	0	0	0	0	0	0	0		0	0	0	0	0	0	0	0	0	0	0	0	0	0	0	2.7199999999999998E-2	7.2599999999999998E-2	0.11205	0.16675000000000001	0.24515000000000001	0.41239999999999999
P3_Y (E10)	E10	P3	Igrov-1	F_1x	200	MM10	GFP	P3Igrov-1200MM10	0	0	0	0	0	0	0	0	0	7.9000000000000008E-3	7.4000000000000003E-3	0	7.6E-3	6.7000000000000002E-3	7.2500000000000004E-3	8.8000000000000005E-3	7.4000000000000003E-3	8.3499999999999998E-3	0		0	8.8999999999999999E-3	0	0	0	0	0	0	0	0	0	0	0	0	1.0699999999999999E-2	0	0	0	2.41E-2	0.10705000000000001	0.1774
P3_Y (F10)	F10	P3	Igrov-1	F_1x	200	MM10	GFP	P3Igrov-1200MM10	0	0	0	0	0	0	0	0	0	0	0	0	0	0	0	0	0	0	0		0	0	0	0	0	0	0	0	0	0	0	0	0	0	2.1950000000000001E-2	5.0950000000000002E-2	0.1084	0.17485000000000001	0.22989999999999999	0.25935000000000002	0.3216
P3_Y (G10)	G10	P3	Igrov-1	F_1x	200	MM10	GFP	P3Igrov-1200MM10	0	0	0	0	0	0	0	0	0	0	0	0	0	0	0	0	0	0	0		0	0	0	0	0	0	0	0	0	0	0	0	0	1.0699999999999999E-2	5.9150000000000001E-2	0.10349999999999999	0.14924999999999999	0.19520000000000001	0.23599999999999999	0.25905	0.31664999999999999
P2_Y (B3)	B3	P2	Igrov-1	F_1x	0	MM11	EF1a_RAS-Sensor	P2Igrov-10MM11	0	0	0	0	0	0	0	0	0	0	0	0	0	0	0	0	0	0	0	0	0	0	0	0	0	0	0	0	0	3.3700000000000001E-2	6.5699999999999995E-2	9.06E-2	0.11855	7.6050000000000006E-2	0.1085	0.14904999999999999	0.17474999999999999	0.22170000000000001	0.25824999999999998	0.23265	0.26774999999999999
P2_Y (C3)	C3	P2	Igrov-1	F_1x	0	MM11	EF1a_RAS-Sensor	P2Igrov-10MM11	0	0	0	0	0	0	0	0	0	0	0	0	0	0	0	0	0	0	0	0	0	0	7.1000000000000004E-3	0	0	0	0	0	7.4999999999999997E-3	9.9500000000000005E-3	1.0999999999999999E-2	1.17E-2	0	2.6349999999999998E-2	5.4399999999999997E-2	0.1358	0.18725	0.29935	0.44845000000000002	0.54220000000000002	0.79
P2_Y (D3)	D3	P2	Igrov-1	F_1x	0	MM11	EF1a_RAS-Sensor	P2Igrov-10MM11	0	0	0	0	0	0	0	0	0	0	0	0	0	0	0	0	0	0	0	0	0	0	0	0	0	0	0	0	0	0	0	0	0	0	8.8500000000000002E-3	1.7850000000000001E-2	6.1800000000000001E-2	9.1300000000000006E-2	0.17860000000000001	0.24645	0.3468
P2_Y (B7)	B7	P2	Igrov-1	F_1x	50	MM11	EF1a_RAS-Sensor	P2Igrov-150MM11	0	0	0	0	0	0	0	0	0	0	0	0	0	0	0	0	0	0	0	0	0	8.8000000000000005E-3	9.1500000000000001E-3	7.4000000000000003E-3	0	7.6499999999999997E-3	0	0	0	0	0	0	8.8000000000000005E-3	0	1.3849999999999999E-2	0	9.1500000000000001E-3	1.0500000000000001E-2	3.0599999999999999E-2	4.7800000000000002E-2	8.8599999999999998E-2
P2_Y (C7)	C7	P2	Igrov-1	F_1x	50	MM11	EF1a_RAS-Sensor	P2Igrov-150MM11	0	0	0	0	0	0	0	0	0	0	0	0	0	0	0	0	0	0	0	0	8.5000000000000006E-3	0	6.8500000000000002E-3	1.1050000000000001E-2	6.7000000000000002E-3	1.155E-2	8.4499999999999992E-3	9.5499999999999995E-3	6.8500000000000002E-3	0	8.8999999999999999E-3	7.7499999999999999E-3	0	2.2499999999999999E-2	7.7600000000000002E-2	0.12354999999999999	0.13965	0.15595000000000001	0.25145000000000001	0.39700000000000002	0.624
P2_Y (D7)	D7	P2	Igrov-1	F_1x	50	MM11	EF1a_RAS-Sensor	P2Igrov-150MM11	0	7.3499999999999998E-3	0	0	0	0	0	0	0	0	0	0	0	0	0	0	0	0	0	0	0	0	6.9499999999999996E-3	0	7.4999999999999997E-3	0	0	0	0	0	0	0	3.1099999999999999E-2	4.2799999999999998E-2	5.04E-2	7.7100000000000002E-2	0.1386	0.24925	0.43009999999999998	0.48459999999999998	0.80615000000000003
P2_Y (B10)	B10	P2	Igrov-1	F_1x	200	MM11	EF1a_RAS-Sensor	P2Igrov-1200MM11	0	6.6499999999999997E-3	0	0	0	0	0	0	0	0	0	0	0	0	0	0	0	0	0	0	9.1000000000000004E-3	8.3999999999999995E-3	1.04E-2	7.7000000000000002E-3	0	0	0	0	0	0	2.0049999999999998E-2	2.52E-2	3.9649999999999998E-2	4.1200000000000001E-2	3.9199999999999999E-2	7.5749999999999998E-2	0.10780000000000001	0.13775000000000001	0.15325	0.20474999999999999	0.25879999999999997
P2_Y (C10)	C10	P2	Igrov-1	F_1x	200	MM11	EF1a_RAS-Sensor	P2Igrov-1200MM11	0	0	0	0	0	0	0	0	0	0	0	0	0	0	0	0	0	0	0	0	6.8500000000000002E-3	8.9499999999999996E-3	0	0	7.4999999999999997E-3	0	7.2500000000000004E-3	0	7.0000000000000001E-3	6.7499999999999999E-3	6.7999999999999996E-3	0	7.4000000000000003E-3	1.555E-2	7.5399999999999995E-2	0.1158	0.15195	0.1895	0.23524999999999999	0.24304999999999999	0.33210000000000001
P2_Y (D10)	D10	P2	Igrov-1	F_1x	200	MM11	EF1a_RAS-Sensor	P2Igrov-1200MM11	0	0	0	0	0	0	0	0	0	0	0	0	0	0	0	0	0	0	0	0	0	0	0	0	0	0	0	0	0	0	0	0	0	0	0	0	0	1.9650000000000001E-2	6.5699999999999995E-2	0.15075	0.22115000000000001
P2_Y (E3)	E3	P2	Igrov-1	F_1x	0	MM12	PY2_NarL-F.L.T	P2Igrov-10MM12	0	0	0	0	0	0	0	0	0	0	0	0	0	0	0	0	0	0	0	0	7.2500000000000004E-3	0	0	0	1.035E-2	7.2500000000000004E-3	0	0	7.3499999999999998E-3	0	0	0	0	0	2.5499999999999998E-2	3.7749999999999999E-2	7.3300000000000004E-2	0.1125	0.14460000000000001	0.20915	0.28079999999999999
P2_Y (F3)	F3	P2	Igrov-1	F_1x	0	MM12	PY2_NarL-F.L.T	P2Igrov-10MM12	0	0	0	0	0	0	0	0	0	0	0	0	0	0	0	0	0	0	0	0	0	0	0	0	0	0	0	0	0	0	0	0	0	0	0	3.39E-2	8.0149999999999999E-2	0.12239999999999999	0.20465	0.24890000000000001	0.39734999999999998
P2_Y (G3)	G3	P2	Igrov-1	F_1x	0	MM12	PY2_NarL-F.L.T	P2Igrov-10MM12	0	0	0	0	0	0	0	0	0	0	0	0	0	0	0	0	0	0	0	0	0	0	0	7.2500000000000004E-3	0	0	0	0	0	0	0	0	0	0	0	0	0	2.6100000000000002E-2	6.2549999999999994E-2	9.8500000000000004E-2	0.16814999999999999
P2_Y (E7)	E7	P2	Igrov-1	F_1x	50	MM12	PY2_NarL-F.L.T	P2Igrov-150MM12	0	0	0	0	0	0	7.7999999999999996E-3	0	0	0	0	0	0	0	0	0	0	0	0	0	0	7.9000000000000008E-3	6.7499999999999999E-3	0	0	0	0	0	0	0	0	0	0	2.1299999999999999E-2	4.2450000000000002E-2	7.1800000000000003E-2	7.5550000000000006E-2	0.1283	5.0099999999999999E-2	8.6749999999999994E-2	0.13355
P2_Y (F7)	F7	P2	Igrov-1	F_1x	50	MM12	PY2_NarL-F.L.T	P2Igrov-150MM12	0	0	0	0	0	0	0	0	0	0	0	0	0	0	0	0	0	0	0	0	0	0	0	0	0	0	0	0	7.0000000000000001E-3	0	0	3.1150000000000001E-2	5.8349999999999999E-2	8.4400000000000003E-2	8.0199999999999994E-2	6.3200000000000006E-2	0.1048	0.17385	0.20824999999999999	0.27205000000000001	0.37780000000000002
P2_Y (G7)	G7	P2	Igrov-1	F_1x	50	MM12	PY2_NarL-F.L.T	P2Igrov-150MM12	0	0	0	0	0	0	0	0	0	0	0	0	0	0	0	0	0	0	0	0	7.1000000000000004E-3	8.7500000000000008E-3	8.4499999999999992E-3	7.1000000000000004E-3	0	0	6.9499999999999996E-3	0	0	1.1299999999999999E-2	2.7150000000000001E-2	3.6450000000000003E-2	5.9799999999999999E-2	5.3800000000000001E-2	7.1150000000000005E-2	9.4E-2	7.1800000000000003E-2	6.9599999999999995E-2	0.10835	0.13639999999999999	0.15060000000000001
P2_Y (E10)	E10	P2	Igrov-1	F_1x	200	MM12	PY2_NarL-F.L.T	P2Igrov-1200MM12	0	0	7.6499999999999997E-3	0	0	0	0	0	0	0	0	0	0	0	0	0	0	0	0	0	9.1500000000000001E-3	2.5899999999999999E-2	0	7.9000000000000008E-3	0	1.12E-2	0	0	8.7500000000000008E-3	1.06E-2	8.5500000000000003E-3	2.2349999999999998E-2	1.23E-2	1.9349999999999999E-2	3.4000000000000002E-2	3.8249999999999999E-2	4.7849999999999997E-2	0.1158	0.16619999999999999	0.19400000000000001	0.19889999999999999
P2_Y (F10)	F10	P2	Igrov-1	F_1x	200	MM12	PY2_NarL-F.L.T	P2Igrov-1200MM12	0	2.5000000000000001E-2	3.85E-2	2.23E-2	2.6100000000000002E-2	3.7600000000000001E-2	3.3500000000000002E-2	1.7100000000000001E-2	1.9449999999999999E-2	2.7300000000000001E-2	9.7999999999999997E-3	2.3949999999999999E-2	2.615E-2	2.3550000000000001E-2	1.1350000000000001E-2	3.3050000000000003E-2	1.7749999999999998E-2	2.725E-2	1.065E-2	1.3350000000000001E-2	0	1.6400000000000001E-2	1.085E-2	0	7.0499999999999998E-3	0	0	0	7.3499999999999998E-3	0	7.3000000000000001E-3	0	1.9800000000000002E-2	0	0	0	0	7.1999999999999998E-3	2.2450000000000001E-2	2.265E-2	3.4950000000000002E-2
P2_Y (G10)	G10	P2	Igrov-1	F_1x	200	MM12	PY2_NarL-F.L.T	P2Igrov-1200MM12	1.2999999999999999E-2	0	0	0	0	0	0	0	0	0	0	0	0	0	0	0	0	0	0	0	0	0	0	0	0	0	0	0	0	1.4749999999999999E-2	3.245E-2	3.6049999999999999E-2	5.8299999999999998E-2	0.1094	0.11899999999999999	0.16375000000000001	0.27260000000000001	0.33825	0.45724999999999999	0.55774999999999997	0.70140000000000002
P2_Y (A10)	A10	P2	Igrov-1	F_1x	DMSO	MM13	Control	P2Igrov-1DMSOMM13	0	0	0	0	0	0	0	0	0	0	0	0	0	0	0	0	0	0	0	0	0	0	0	0	0	0	0	0	0	0	0	0	0	0	0	0	0	0	0	1.8700000000000001E-2	4.0849999999999997E-2
P2_Y (A7)	A7	P2	Igrov-1	F_1x	pos.Ctrl	MM13	Control	P2Igrov-1pos.CtrlMM13	0	0	0	0	0	0	0	0	0	0	0	0	0	0	0	0	0	0	0	0	1.6750000000000001E-2	8.6E-3	1.545E-2	1.04E-2	1.0500000000000001E-2	1.0800000000000001E-2	1.0699999999999999E-2	1.005E-2	1.09E-2	1.0699999999999999E-2	9.5499999999999995E-3	1.0149999999999999E-2	1.1900000000000001E-2	9.1999999999999998E-3	8.5500000000000003E-3	8.7500000000000008E-3	1.0749999999999999E-2	1.145E-2	2.2849999999999999E-2	2.5649999999999999E-2	3.3700000000000001E-2
P2_Y (A3)	A3	P2	Igrov-1	F_1x	Triton	MM13	Control	P2Igrov-1TritonMM13	0	0	0	0	0	0	0	0	0	0	0	0	0	0	0	0	0	0	0	0	9.4000000000000004E-3	0	8.0999999999999996E-3	0	0	0	0	0	0	0	0	0	0	0	0	0	0	9.6500000000000006E-3	1.0500000000000001E-2	0	0
P3_Y (B3)	B3	P3	Igrov-1	F_1x	0	MM14	EF1a_HSVTK	P3Igrov-10MM14	7.2500000000000004E-3	0	0	0	0	0	0	0	0	0	0	0	0	0	1.0749999999999999E-2	1.175E-2	1.2500000000000001E-2	1.4149999999999999E-2	1.225E-2		1.0149999999999999E-2	0	1.3650000000000001E-2	1.2200000000000001E-2	1.465E-2	0	1.575E-2	2.1000000000000001E-2	2.545E-2	1.915E-2	2.2800000000000001E-2	1.745E-2	1.4749999999999999E-2	1.4800000000000001E-2	1.26E-2	0	9.5499999999999995E-3	2.3400000000000001E-2	2.1350000000000001E-2	4.0250000000000001E-2	5.2900000000000003E-2
P3_Y (C3)	C3	P3	Igrov-1	F_1x	0	MM14	EF1a_HSVTK	P3Igrov-10MM14	0	0	0	0	0	0	0	0	0	0	0	0	0	0	0	0	0	0	0		6.8500000000000002E-3	0	0	1.435E-2	2.085E-2	1.7000000000000001E-2	1.5800000000000002E-2	9.5499999999999995E-3	1.585E-2	1.3950000000000001E-2	1.46E-2	1.455E-2	1.4E-2	8.2500000000000004E-3	8.3999999999999995E-3	0	7.9500000000000005E-3	1.7399999999999999E-2	2.9000000000000001E-2	6.7699999999999996E-2	0.14185
P3_Y (D3)	D3	P3	Igrov-1	F_1x	0	MM14	EF1a_HSVTK	P3Igrov-10MM14	0	0	0	0	0	0	0	0	0	0	0	0	0	0	0	0	0	0	0		0	0	0	0	0	0	0	0	0	0	7.7999999999999996E-3	2.4E-2	2.4799999999999999E-2	6.9800000000000001E-2	9.5350000000000004E-2	0.12470000000000001	0.17865	0.22359999999999999	0.25505	0.27650000000000002	0.28029999999999999
P3_Y (B7)	B7	P3	Igrov-1	F_1x	50	MM14	EF1a_HSVTK	P3Igrov-150MM14	0	0	0	0	0	0	0	0	0	0	0	0	0	0	0	0	0	0	0		0	0	0	0	7.7499999999999999E-3	0	0	0	0	0	0	0	0	2.1749999999999999E-2	6.7500000000000004E-2	7.8049999999999994E-2	0.1038	0.14685000000000001	0.17510000000000001	0.20655000000000001	0.34055000000000002
P3_Y (C7)	C7	P3	Igrov-1	F_1x	50	MM14	EF1a_HSVTK	P3Igrov-150MM14	0	0	0	0	0	0	0	0	0	0	0	0	0	0	0	0	0	0	0		0	0	0	0	0	0	6.8500000000000002E-3	0	0	0	0	1.3599999999999999E-2	7.2749999999999995E-2	0.10564999999999999	0.1686	0.25514999999999999	0.33374999999999999	0.35110000000000002	0.3775	0.47620000000000001	0.48015000000000002
P3_Y (D7)	D7	P3	Igrov-1	F_1x	50	MM14	EF1a_HSVTK	P3Igrov-150MM14	0	0	0	0	0	6.8999999999999999E-3	8.3000000000000001E-3	6.9499999999999996E-3	0	7.9000000000000008E-3	7.2500000000000004E-3	7.3499999999999998E-3	0	8.8500000000000002E-3	7.7499999999999999E-3	8.2500000000000004E-3	9.2499999999999995E-3	8.7500000000000008E-3	0		0	0	0	7.45E-3	8.0000000000000002E-3	0	0	0	1.4200000000000001E-2	1.84E-2	0.02	4.0399999999999998E-2	0	0	0	0	0	0	0	1.0449999999999999E-2	6.905E-2
P3_Y (B10)	B10	P3	Igrov-1	F_1x	200	MM14	EF1a_HSVTK	P3Igrov-1200MM14	0	0	0	0	0	0	0	0	1.15E-2	9.0500000000000008E-3	0	0	8.3000000000000001E-3	1.0149999999999999E-2	1.0699999999999999E-2	8.3499999999999998E-3	1.0500000000000001E-2	0	7.6E-3		0	0	0	0	0	0	0	0	0	0	0	0	0	9.9000000000000008E-3	1.9550000000000001E-2	7.6E-3	5.74E-2	0.1341	0.18554999999999999	0.23649999999999999	0.3115
P3_Y (C10)	C10	P3	Igrov-1	F_1x	200	MM14	EF1a_HSVTK	P3Igrov-1200MM14	0	0	0	0	0	0	0	0	0	0	0	0	0	0	0	0	0	0	0		0	0	0	0	0	0	0	0	0	0	0	0	0	0	4.0399999999999998E-2	0.10245	0.15165000000000001	0.15315000000000001	0.16095000000000001	0.16794999999999999	0.21390000000000001
P3_Y (D10)	D10	P3	Igrov-1	F_1x	200	MM14	EF1a_HSVTK	P3Igrov-1200MM14	0	0	0	0	0	0	0	0	0	0	0	0	0	0	0	0	0	0	0		0	0	0	0	0	0	0	0	0	0	0	0	0	0	2.8649999999999998E-2	6.6600000000000006E-2	0.1198	0.2162	0.2777	0.35	0.45865
P5_Y (E2)	E2	P5	SW620	F_1.5x	0	MM10	GFP	P5SW6200MM10	0	0	0	0	0	0	0	0	0	0	0	0	0	0	0	0	0	0	0		0	0	0	0	0	0	0	0	0	0	5.3499999999999997E-3	3.805E-2	7.6149999999999995E-2	0.1118	0.17050000000000001	0.27515000000000001	0.35825000000000001	0.54554999999999998	0.61475000000000002	0.75860000000000005	0.90200000000000002
P5_Y (F2)	F2	P5	SW620	F_1.5x	0	MM10	GFP	P5SW6200MM10	0	0	0	0	0	0	0	0	0	0	0	0	0	0	0	0	0	0	0		0	0	0	0	0	0	0	0	0	8.6E-3	9.6500000000000006E-3	2.6800000000000001E-2	5.2350000000000001E-2	0.1348	0.23150000000000001	0.31830000000000003	0.39545000000000002	0.50565000000000004	0.68415000000000004	0.83825000000000005	1.0308999999999999
P5_Y (G2)	G2	P5	SW620	F_1.5x	0	MM10	GFP	P5SW6200MM10	0	0	0	0	0	0	0	0	0	0	0	0	0	0	0	0	0	0	0		0	0	0	0	0	0	0	0	5.45E-3	1.8350000000000002E-2	3.9E-2	7.2499999999999995E-2	0.11169999999999999	0.18554999999999999	0.27500000000000002	0.35625000000000001	0.45824999999999999	0.57935000000000003	0.73035000000000005	0.91469999999999996	1.11215
P5_Y (E6)	E6	P5	SW620	F_1.5x	50	MM10	GFP	P5SW62050MM10	4.7000000000000002E-3	4.8999999999999998E-3	5.1500000000000001E-3	5.1500000000000001E-3	5.0000000000000001E-3	5.0000000000000001E-3	4.8999999999999998E-3	4.5999999999999999E-3	5.2500000000000003E-3	4.9500000000000004E-3	4.8999999999999998E-3	4.4999999999999997E-3	4.9500000000000004E-3	4.9500000000000004E-3	4.7499999999999999E-3	4.8500000000000001E-3	5.1000000000000004E-3	4.9500000000000004E-3	4.45E-3		5.1000000000000004E-3	5.1000000000000004E-3	4.7499999999999999E-3	4.6499999999999996E-3	5.0000000000000001E-3	5.0000000000000001E-3	4.7499999999999999E-3	4.8999999999999998E-3	5.2500000000000003E-3	1.3650000000000001E-2	1.6799999999999999E-2	3.6850000000000001E-2	7.145E-2	0.11	0.17505000000000001	0.22585	0.30595	0.38579999999999998	0.47949999999999998	0.59545000000000003	0.76144999999999996
P5_Y (F6)	F6	P5	SW620	F_1.5x	50	MM10	GFP	P5SW62050MM10	0	0	0	0	0	0	0	0	0	0	0	0	0	0	0	0	0	0	0		0	0	0	0	0	0	0	0	0	0	0	0	1.9349999999999999E-2	4.9599999999999998E-2	7.0599999999999996E-2	0.12095	0.18945000000000001	0.29949999999999999	0.42909999999999998	0.60119999999999996	0.78779999999999994
P5_Y (G6)	G6	P5	SW620	F_1.5x	50	MM10	GFP	P5SW62050MM10	0	0	0	0	0	0	0	0	0	0	0	0	0	0	0	0	0	0	0		0	0	0	0	0	0	5.1999999999999998E-3	2.1250000000000002E-2	2.945E-2	3.125E-2	3.8399999999999997E-2	5.7450000000000001E-2	0.1021	0.14435000000000001	0.2036	0.27725	0.36464999999999997	0.44479999999999997	0.57169999999999999	0.7329	0.90639999999999998
P5_Y (E9)	E9	P5	SW620	F_1.5x	200	MM10	GFP	P5SW620200MM10	0	0	0	0	0	0	0	0	0	0	0	0	0	0	0	0	0	0	0		0	0	0	0	0	0	0	0	0	6.5500000000000003E-3	2.2100000000000002E-2	4.2900000000000001E-2	7.7649999999999997E-2	0.1371	0.23494999999999999	0.29004999999999997	0.38314999999999999	0.50160000000000005	0.67330000000000001	0.80259999999999998	0.93410000000000004
P5_Y (F9)	F9	P5	SW620	F_1.5x	200	MM10	GFP	P5SW620200MM10	0	0	0	0	0	0	0	0	0	0	0	0	0	0	0	0	0	0	0		0	0	0	0	0	0	0	0	0	1.515E-2	2.1350000000000001E-2	3.1800000000000002E-2	5.7099999999999998E-2	0.12625	0.23895	0.33710000000000001	0.49890000000000001	0.64654999999999996	0.75744999999999996	0.92830000000000001	1.0345
P5_Y (G9)	G9	P5	SW620	F_1.5x	200	MM10	GFP	P5SW620200MM10	0	0	0	0	0	0	0	0	0	0	0	0	0	0	0	0	0	0	0		0	0	0	0	0	0	0	5.1500000000000001E-3	7.3499999999999998E-3	1.5900000000000001E-2	4.3150000000000001E-2	8.2400000000000001E-2	0.1268	0.16955000000000001	0.27260000000000001	0.41399999999999998	0.51060000000000005	0.67435	0.85	1.0306500000000001	1.23515
P4_Y (B2)	B2	P4	SW620	F_1.5x	0	MM11	EF1a_RAS-Sensor	P4SW6200MM11	0	0	0	0	0	0	0	0	0	0	0	0	0	0	0	0	0	0	0		0	0	0	0	0	3.5000000000000003E-2	7.4200000000000002E-2	0.1724	0.33139999999999997	0.47149999999999997	0.64090000000000003	0.77759999999999996	0.97740000000000005	1.1345000000000001	1.3395999999999999	1.5466	1.8877999999999999	2.2736999999999998	2.6524000000000001	2.9794999999999998	3.2999000000000001
P4_Y (C2)	C2	P4	SW620	F_1.5x	0	MM11	EF1a_RAS-Sensor	P4SW6200MM11	0	0	0	0	0	0	0	0	0	0	0	0	0	0	0	0	0	0	0		0	0	0	0	0	9.7000000000000003E-3	2.9100000000000001E-2	4.48E-2	5.2900000000000003E-2	6.25E-2	9.9599999999999994E-2	0.1593	0.25309999999999999	0.438	0.64600000000000002	0.89739999999999998	1.2528999999999999	1.6480999999999999	1.9872000000000001	2.3605999999999998	2.7416999999999998
P4_Y (D2)	D2	P4	SW620	F_1.5x	0	MM11	EF1a_RAS-Sensor	P4SW6200MM11	0	0	0	0	0	0	0	0	0	0	0	0	0	0	0	0	0	0	0		0	0	0	0	4.4999999999999997E-3	6.1999999999999998E-3	7.0000000000000001E-3	7.9000000000000008E-3	3.3300000000000003E-2	7.1400000000000005E-2	0.1154	0.21579999999999999	0.37609999999999999	0.49890000000000001	0.71779999999999999	1.0327999999999999	1.3351999999999999	1.6821999999999999	2.0676000000000001	2.4668999999999999	2.8077000000000001
P4_Y (B6)	B6	P4	SW620	F_1.5x	50	MM11	EF1a_RAS-Sensor	P4SW62050MM11	0	0	0	0	0	0	0	0	0	0	0	0	0	0	0	0	0	0	0		0	0	0	0	0	1.0999999999999999E-2	1.7500000000000002E-2	2.0500000000000001E-2	5.6099999999999997E-2	0.1308	0.18129999999999999	0.30880000000000002	0.45700000000000002	0.63039999999999996	0.79830000000000001	0.99960000000000004	1.2594000000000001	1.6509	1.9898	2.3024	2.6242999999999999
P4_Y (C6)	C6	P4	SW620	F_1.5x	50	MM11	EF1a_RAS-Sensor	P4SW62050MM11	0	0	0	0	0	0	0	0	0	0	0	0	0	0	0	0	0	0	0		0	0	0	0	0	0	0	0	2.8500000000000001E-2	6.25E-2	0.107	0.17680000000000001	0.28110000000000002	0.46429999999999999	0.6633	0.82389999999999997	1.1126	1.5474000000000001	1.9486000000000001	2.3843000000000001	2.8813
P4_Y (D6)	D6	P4	SW620	F_1.5x	50	MM11	EF1a_RAS-Sensor	P4SW62050MM11	0	0	0	0	0	0	0	0	0	0	0	0	0	0	0	0	0	0	0		0	0	0	0	2.47E-2	5.5E-2	0.1038	0.16500000000000001	0.2722	0.39929999999999999	0.52100000000000002	0.70099999999999996	0.83240000000000003	1.0206	1.2132000000000001	1.4239999999999999	1.7967	1.9117	2.3403999999999998	2.6036999999999999	3.0219999999999998
P4_Y (B9)	B9	P4	SW620	F_1.5x	200	MM11	EF1a_RAS-Sensor	P4SW620200MM11	0	0	0	0	0	0	0	0	0	0	0	0	0	0	0	0	0	0	0		0	0	0	6.1999999999999998E-3	1.66E-2	2.0299999999999999E-2	2.24E-2	2.8799999999999999E-2	3.0800000000000001E-2	3.9199999999999999E-2	4.3299999999999998E-2	8.3599999999999994E-2	0.1037	0.15090000000000001	0.19639999999999999	0.2087	0.23400000000000001	0.27439999999999998	0.30759999999999998	0.35620000000000002	0.42880000000000001
P4_Y (C9)	C9	P4	SW620	F_1.5x	200	MM11	EF1a_RAS-Sensor	P4SW620200MM11	0	0	0	0	0	0	0	0	0	0	0	0	0	0	0	0	0	0	0		0	0	0	0	0	0	1.5900000000000001E-2	4.2099999999999999E-2	8.9700000000000002E-2	0.1205	0.13489999999999999	0.18579999999999999	0.29270000000000002	0.34549999999999997	0.57579999999999998	0.81359999999999999	1.0683	1.3807	1.6987000000000001	2.1274999999999999	2.5432999999999999
P4_Y (D9)	D9	P4	SW620	F_1.5x	200	MM11	EF1a_RAS-Sensor	P4SW620200MM11	0	0	0	0	0	0	0	0	0	0	0	0	0	0	0	0	0	0	0		0	0	0	0	0	1.7000000000000001E-2	3.3700000000000001E-2	4.4400000000000002E-2	4.6300000000000001E-2	5.0599999999999999E-2	8.6400000000000005E-2	0.1293	0.22270000000000001	0.33310000000000001	0.503	0.69489999999999996	0.95150000000000001	1.2696000000000001	1.6012999999999999	2.0182000000000002	2.2755999999999998
P4_Y (E2)	E2	P4	SW620	F_1.5x	0	MM12	PY2_NarL-F.L.T	P4SW6200MM12	0	0	0	0	0	0	0	0	0	0	0	0	0	0	0	0	0	0	0		0	0	0	0	0	0	0	0	0	0	0	1.1299999999999999E-2	5.0999999999999997E-2	0.13739999999999999	0.29310000000000003	0.49199999999999999	0.75729999999999997	0.91400000000000003	1.341	1.615	1.9972000000000001
P4_Y (F2)	F2	P4	SW620	F_1.5x	0	MM12	PY2_NarL-F.L.T	P4SW6200MM12	0	4.3E-3	0	0	0	0	0	0	0	0	0	0	0	0	0	0	0	9.4999999999999998E-3	8.3000000000000001E-3		0	4.7999999999999996E-3	0	0	0	0	0	0	0	1.3100000000000001E-2	2.3E-2	6.0499999999999998E-2	0.12540000000000001	0.22589999999999999	0.33679999999999999	0.46600000000000003	0.64449999999999996	0.89490000000000003	1.1716	1.4990000000000001	1.8531
P4_Y (G2)	G2	P4	SW620	F_1.5x	0	MM12	PY2_NarL-F.L.T	P4SW6200MM12	0	0	0	0	0	0	0	0	0	0	0	0	0	0	0	0	0	0	0		0	0	0	0	0	0	2.47E-2	4.9700000000000001E-2	6.3200000000000006E-2	7.5700000000000003E-2	0.1188	0.15479999999999999	0.223	0.33879999999999999	0.5403	0.69499999999999995	0.90569999999999995	1.1548	1.4713000000000001	1.6907000000000001	2.0609000000000002
P4_Y (E6)	E6	P4	SW620	F_1.5x	50	MM12	PY2_NarL-F.L.T	P4SW62050MM12	0	0	0	0	0	0	0	0	0	0	0	0	0	0	0	0	0	0	0		0	0	0	0	8.5000000000000006E-3	1.3599999999999999E-2	1.7500000000000002E-2	2.64E-2	4.2799999999999998E-2	8.8599999999999998E-2	0.20080000000000001	0.3075	0.47499999999999998	0.64439999999999997	0.87729999999999997	1.1944999999999999	1.5501	1.9256	2.3216999999999999	2.6572	3.1215999999999999
P4_Y (F6)	F6	P4	SW620	F_1.5x	50	MM12	PY2_NarL-F.L.T	P4SW62050MM12	0	0	0	0	0	0	0	0	0	0	0	0	0	0	0	0	0	0	0		0	0	0	0	0	0	7.4000000000000003E-3	1.43E-2	1.6299999999999999E-2	2.3400000000000001E-2	6.1100000000000002E-2	0.12230000000000001	0.26950000000000002	0.39560000000000001	0.58840000000000003	0.7853	1.0056	1.3622000000000001	1.6393	2.008	2.4195000000000002
P4_Y (G6)	G6	P4	SW620	F_1.5x	50	MM12	PY2_NarL-F.L.T	P4SW62050MM12	0	0	0	0	0	0	0	0	0	0	0	0	0	0	0	0	0	0	0		0	0	0	0	0	0	0	0	5.8999999999999999E-3	1.26E-2	7.3499999999999996E-2	0.113	0.15959999999999999	0.24529999999999999	0.33910000000000001	0.46160000000000001	0.67630000000000001	0.95679999999999998	1.1873	1.4913000000000001	1.8082
P4_Y (E9)	E9	P4	SW620	F_1.5x	200	MM12	PY2_NarL-F.L.T	P4SW620200MM12	0	0	0	0	0	0	0	0	0	0	0	0	0	0	0	0	0	0	0		0	0	0	0	0	0	6.1999999999999998E-3	1.7600000000000001E-2	2.8799999999999999E-2	6.7400000000000002E-2	9.5600000000000004E-2	0.17449999999999999	0.2923	0.41339999999999999	0.58460000000000001	0.81879999999999997	1.0628	1.3806	1.6911	2.1113	2.6318000000000001
P4_Y (F9)	F9	P4	SW620	F_1.5x	200	MM12	PY2_NarL-F.L.T	P4SW620200MM12	0	0	0	0	0	0	0	0	0	0	0	0	0	0	0	0	0	0	0		0	0	0	0	0	5.8999999999999999E-3	4.2099999999999999E-2	5.4399999999999997E-2	6.1699999999999998E-2	8.4599999999999995E-2	0.12590000000000001	0.20810000000000001	0.30990000000000001	0.45810000000000001	0.59370000000000001	0.875	1.0798000000000001	1.3459000000000001	1.7327999999999999	2.0951	2.5011000000000001
P4_Y (G9)	G9	P4	SW620	F_1.5x	200	MM12	PY2_NarL-F.L.T	P4SW620200MM12	0	0	0	0	0	0	0	0	0	0	0	0	0	0	0	0	0	0	0		0	0	0	0	0	0	0	0	0	0	2.0299999999999999E-2	4.6800000000000001E-2	0.1138	0.24179999999999999	0.42030000000000001	0.64449999999999996	0.99360000000000004	1.3681000000000001	1.6981999999999999	2.0036	2.4470999999999998
P4_Y (A9)	A9	P4	SW620	F_1.5x	DMSO	MM13	Control	P4SW620DMSOMM13	0	0	0	0	0	0	0	0	0	0	0	0	0	0	0	0	0	0	0		0	0	0	0	0	0	0	0	0	2.8400000000000002E-2	5.3699999999999998E-2	8.43E-2	0.1439	0.247	0.37369999999999998	0.46800000000000003	0.57909999999999995	0.69840000000000002	0.76770000000000005	0.9456	1.1480999999999999
P4_Y (A6)	A6	P4	SW620	F_1.5x	pos.Ctrl	MM13	Control	P4SW620pos.CtrlMM13	0	0	0	0	0	0	0	0	0	0	0	0	0	0	0	0	0	0	0		0	0	0	0	0	0	6.4999999999999997E-3	1.24E-2	1.67E-2	1.8100000000000002E-2	2.69E-2	4.7300000000000002E-2	9.0499999999999997E-2	0.19520000000000001	0.29139999999999999	0.43969999999999998	0.58730000000000004	0.7883	1.0215000000000001	1.2749999999999999	1.5202
P4_Y (A2)	A2	P4	SW620	F_1.5x	Triton	MM13	Control	P4SW620TritonMM13	6.7999999999999996E-3	0	4.4999999999999997E-3	0	0	0	0	4.5999999999999999E-3	0	5.1000000000000004E-3	0	5.7999999999999996E-3	4.4000000000000003E-3	0	0	0	0	0	0		0	4.8999999999999998E-3	4.4999999999999997E-3	0	4.4000000000000003E-3	5.0000000000000001E-3	0	4.7999999999999996E-3	0	0	4.8999999999999998E-3	1.0999999999999999E-2	6.2899999999999998E-2	0.10639999999999999	0.1976	0.27310000000000001	0.35699999999999998	0.48780000000000001	0.68089999999999995	0.87380000000000002	1.0311999999999999
P5_Y (B2)	B2	P5	SW620	F_1.5x	0	MM14	EF1a_HSVTK	P5SW6200MM14	0	0	0	0	0	0	0	0	0	0	0	0	0	0	0	0	0	0	0		0	0	0	0	0	2.0150000000000001E-2	5.2150000000000002E-2	0.1046	0.16600000000000001	0.23019999999999999	0.34200000000000003	0.44935000000000003	0.53274999999999995	0.67645	0.81189999999999996	0.98975000000000002	1.16635	1.4154500000000001	1.72265	2.0554999999999999	2.4233500000000001
P5_Y (C2)	C2	P5	SW620	F_1.5x	0	MM14	EF1a_HSVTK	P5SW6200MM14	0	0	0	0	0	0	0	0	0	0	0	0	0	0	0	0	0	0	0		0	0	0	4.7499999999999999E-3	7.1000000000000004E-3	8.9999999999999993E-3	6.2399999999999997E-2	0.1128	0.18770000000000001	0.25430000000000003	0.32790000000000002	0.44114999999999999	0.62809999999999999	0.8085	1.03335	1.2764	1.4762500000000001	1.6749000000000001	2.0078499999999999	2.3157999999999999	2.8156500000000002
P5_Y (D2)	D2	P5	SW620	F_1.5x	0	MM14	EF1a_HSVTK	P5SW6200MM14	0	0	0	0	0	0	0	0	0	0	0	0	0	0	0	0	0	0	0		6.9499999999999996E-3	5.6499999999999996E-3	1.2E-2	1.3050000000000001E-2	1.4E-2	1.515E-2	2.1950000000000001E-2	3.56E-2	4.9500000000000002E-2	5.7250000000000002E-2	9.5600000000000004E-2	0.14419999999999999	0.23824999999999999	0.36275000000000002	0.49440000000000001	0.63475000000000004	0.78264999999999996	0.99045000000000005	1.2961499999999999	1.59175	1.8771
P5_Y (B6)	B6	P5	SW620	F_1.5x	50	MM14	EF1a_HSVTK	P5SW62050MM14	0	0	0	0	0	0	0	0	0	0	0	0	0	0	0	0	0	0	0		0	0	0	0	0	0	1.1050000000000001E-2	1.575E-2	6.0600000000000001E-2	8.9849999999999999E-2	0.1201	0.15690000000000001	0.20730000000000001	0.3881	0.51644999999999996	0.65300000000000002	0.78734999999999999	1.0024999999999999	1.2363999999999999	1.5488999999999999	1.7725500000000001
P5_Y (C6)	C6	P5	SW620	F_1.5x	50	MM14	EF1a_HSVTK	P5SW62050MM14	0	0	0	0	0	0	0	0	0	0	0	0	0	0	0	0	0	0	0		0	0	0	0	0	1.495E-2	2.3699999999999999E-2	3.3700000000000001E-2	5.2850000000000001E-2	8.7150000000000005E-2	0.14155000000000001	0.20795	0.29535	0.42249999999999999	0.62114999999999998	0.72245000000000004	0.94940000000000002	1.1591499999999999	1.38395	1.69685	2.1307999999999998
P5_Y (D6)	D6	P5	SW620	F_1.5x	50	MM14	EF1a_HSVTK	P5SW62050MM14	0	0	0	0	0	0	0	0	0	0	0	0	0	0	0	0	0	0	0		0	0	0	0	0	0	6.3E-3	3.4799999999999998E-2	9.6549999999999997E-2	0.14105000000000001	0.18225	0.2445	0.35089999999999999	0.44340000000000002	0.60585	0.81955	1.0583	1.3121	1.6113500000000001	1.9056	2.2308500000000002
P5_Y (B9)	B9	P5	SW620	F_1.5x	200	MM14	EF1a_HSVTK	P5SW620200MM14	0	0	0	0	0	0	0	0	0	0	0	0	0	0	0	0	0	0	0		0	0	0	0	0	0	0	0	1.025E-2	4.0750000000000001E-2	6.0299999999999999E-2	0.10535	0.14655000000000001	0.22855	0.30680000000000002	0.45639999999999997	0.56325000000000003	0.69799999999999995	0.84260000000000002	0.98599999999999999	1.1793499999999999
P5_Y (C9)	C9	P5	SW620	F_1.5x	200	MM14	EF1a_HSVTK	P5SW620200MM14	0	0	0	0	0	0	0	0	0	0	0	0	0	0	0	0	0	0	0		0	0	0	0	0	0	0	0	8.8500000000000002E-3	1.915E-2	7.8299999999999995E-2	0.15620000000000001	0.22284999999999999	0.33944999999999997	0.49535000000000001	0.63714999999999999	0.80900000000000005	1.01495	1.20825	1.4517500000000001	1.7661500000000001
P5_Y (D9)	D9	P5	SW620	F_1.5x	200	MM14	EF1a_HSVTK	P5SW620200MM14	0	0	0	0	0	0	0	0	0	0	0	0	0	0	0	0	0	0	0		0	0	0	0	0	0	5.45E-3	2.3050000000000001E-2	3.9149999999999997E-2	4.4699999999999997E-2	7.6399999999999996E-2	0.15325	0.29699999999999999	0.4501	0.51105	0.68125000000000002	0.87239999999999995	1.0550999999999999	1.3425	1.5528500000000001	1.9293499999999999
[truncated: 145 more columns]
