# Supplementary material for: Synthetic gene circuits that selectively target RAS-driven cancers
Source: eLife. 2026 Feb 24;14:RP104320. doi: 10.7554/eLife.104320 (PMC12931925; doi:10.7554/eLife.104320)
Supplement: Supplementary file 2. [file elife-104320-supp2.xlsx]

## Sheet: Table S2
	Supplementary Table 2: Sequences of Circuit Parts
		Part	Length	Sequence
	NarX
		NarX-H399Q	666	ATGCAAGAGCGGCAGCAGCAGCTCATCGTCATGGAAGAGAGGGCGACTATTGCCCGGGAGCTTCAGGATTCCATTGCACAGTCACTGTCGTGCATGAAGATGCAAGTGAGCTGTCTGCAAATGCAGGGGGACGCGCTCCCCGAGTCGAGCCGCGAACTGCTGTCCCAGATCCGAAATGAGTTGAATGCGAGCTGGGCACAGCTGAGAGAGCTTCTGACGACATTCCGCCTGCAGCTGACCGAGCCCGGTCTTAGGCCAGCTTTGGAGGCATCGTGCGAAGAGTATTCAGCGAAATTTGGATTTCCCGTCAAACTTGATTACCAACTGCCTCCTCGCCTTGTACCCTCCCACCAGGCGATTCACCTGCTTCAGATCGCGAGAGAAGCACTCTCGAATGCT…
		NarX-N509A	666	ATGCAAGAGCGGCAGCAGCAGCTCATCGTCATGGAAGAGAGGGCGACTATTGCCCGGGAGCTTCACGATTCCATTGCACAGTCACTGTCGTGCATGAAGATGCAAGTGAGCTGTCTGCAAATGCAGGGGGACGCGCTCCCCGAGTCGAGCCGCGAACTGCTGTCCCAGATCCGAAATGAGTTGAATGCGAGCTGGGCACAGCTGAGAGAGCTTCTGACGACATTCCGCCTGCAGCTGACCGAGCCCGGTCTTAGGCCAGCTTTGGAGGCATCGTGCGAAGAGTATTCAGCGAAATTTGGATTTCCCGTCAAACTTGATTACCAACTGCCTCCTCGCCTTGTACCCTCCCACCAGGCGATTCACCTGCTTCAGATCGCGAGAGAAGCACTCTCGGCAGCT…
	positive NarX dimerization controls
		full length NarX-H399Q	1803	ATGCTTAAAAGATGTCTCTCACCCCTTACTCTCGTGAACCAGGTGGCGCTTATTGTATTGTTGTCAACCGCGATCGGGCTGGCGGGCATGGCTGTGTCCGGTTGGCTCGTACAGGGGGTGCAGGGGTCGGCACATGCGATCAATAAGGCGGGTTCGCTGAGAATGCAGTCATACCGCCTGTTGGCTGCGGTGCCGCTGTCGGAAAAGGACAAGCCGCTGATCAAGGAGATGGAGCAGACAGCATTTTCAGCCGAGTTGACGAGAGCGGCGGAAAGGGATGGGCAGCTTGCACAACTTCAGGGGCTCCAAGATTATTGGCGGAACGAATTGATCCCAGCGCTTATGAGAGCCCAGAATCGGGAGACAGTCTCAGCAGATGTATCGCAGTTCGTCGCCGGG…
		full length NarX-N509A	1803	ATGCTTAAAAGATGTCTCTCACCCCTTACTCTCGTGAACCAGGTGGCGCTTATTGTATTGTTGTCAACCGCGATCGGGCTGGCGGGCATGGCTGTGTCCGGTTGGCTCGTACAGGGGGTGCAGGGGTCGGCACATGCGATCAATAAGGCGGGTTCGCTGAGAATGCAGTCATACCGCCTGTTGGCTGCGGTGCCGCTGTCGGAAAAGGACAAGCCGCTGATCAAGGAGATGGAGCAGACAGCATTTTCAGCCGAGTTGACGAGAGCGGCGGAAAGGGATGGGCAGCTTGCACAACTTCAGGGGCTCCAAGATTATTGGCGGAACGAATTGATCCCAGCGCTTATGAGAGCCCAGAATCGGGAGACAGTCTCAGCAGATGTATCGCAGTTCGTCGCCGGG…
		FKBP-NarX-H399Q	1023	ATGGGCGTGCAGGTGGAGACTATCTCCCCAGGAGACGGGCGCACCTTCCCCAAGCGCGGCCAGACCTGCGTGGTGCACTACACCGGGATGCTTGAAGATGGAAAGAAATTTGATTCCTCCCGGGACAGAAACAAGCCCTTTAAGTTTATGCTAGGCAAGCAGGAGGTGATCCGAGGCTGGGAAGAAGGGGTTGCCCAGATGAGTGTGGGTCAGAGAGCCAAACTGACTATATCTCCAGATTATGCCTATGGTGCCACTGGGCACCCAGGCATCATCCCACCACATGCCACTCTCGTCTTCGATGTGGAGCTTCTAAAACTGGAAGGTGGAGGCGGTTCAGGCGGTGGCGGGTCGcaagagcggcagcagcagctCATCGTCATGGAAGAGAGGGCGACT…
		FRB-NarX-N509A	984	ATGGTAGCCATCCTCTGGCATGAGATGTGGCATGAAGGTCTAGAAGAGGCCTCTCGCTTGTACTTTGGGGAGAGGAACGTCAAAGGCATGTTTGAGGTGCTGGAGCCCCTGCATGCTATGATGGAACGCGGTCCCCAGACCCTGAAGGAAACGTCCTTTAATCAGGCATATGGTCGAGATTTAATGGAGGCACAAGAATGGTGCCGAAAGTACATGAAATCAGGGAACGTCAAGGACCTCctgCAAGCCTGGGACCTCTACTATCACGTGTTCAGACGGATATCAGGTGGAGGCGGTTCAGGCGGTGGCGGGTCGcaagagcggcagcagcagctCATCGTCATGGAAGAGAGGGCGACTATTGCCCGGGAGCTTCACGATTCCATTGCACAGTCACTG…
	Binding Domains:
		RBDCRD	516	ATGATGCCTTCTAAGACAAGCAACACTATCCGTGTTTTCTTGCCGAACAAGCAAAGAACAGTGGTCAATGTGCGAAATGGAATGAGCTTGCATGACTGCCTTATGAAAGCACTCAAGGTGAGGGGCCTGCAACCAGAGTGCTGTGCAGTGTTCAGACTTCTCCACGAACACAAAGGTGCCAAAGCACGCTTAGATTGGAATACTGATGCTGCGTCTTTGATTGGAGAAGAACTTCAAGTAGATTTCCTGGATCATGTTCCCCTCACAACACACAACTTTGCTCGGAAGACGTTCCTGAAACTTGCCTTCTGTGACATCTGTCAGAAATTCCTGCTCAATGGATTTCGATGTCAGACTTGTGGCTACAAATTTCATGAGCACTGTAGCACCAAAGTACCT…
		RA(Rassf5)	483	ATGACACAGCGCCCGCCCACACTGCAGGAGATCAAGCAGAAGATCGACAGCTACAACACGCGAGAGAAGAACTGCCTGGGCATGAAACTGAGTGAAGACGGCACCTACACGGGTTTCATCAAAGTGCATCTGAAACTCCGGCGGCCTGTGACGGTGCCTGCTGGGATTCGGCCCCAGTCCATCTATGATGCCATCAAGGAGGTGAACCTGGCGGCTACCACGGACAAGCGGACATCCTTCTACCTGCCCCTAGATGCCATCAAGCAGCTGCACATCAGCAGCACCACCACCGTCAGTGAGGTCATCCAGGGGCTGCTCAAGAAGTTCATGGTTGTGGACAATCCCCAGAAGTTTGCACTTTTTAAGCGGATACACAAGGACGGACAAGTGCTCTTCCAG…
		K55	471	ATGGACCTTGGTAAGAAGCTCTTGGAAGCAGCCAGGGCAGGCCAAGATGACGAAGTGAGAATCCTGATGGCAAATGGAGCCGACGTCAATGCTAATGACTCCGCCGGACATACACCCTTGCACCTCGCGGCAAAGAGAGGCCATTTAGAGATAGTTGAGGTGCTCCTCAAACACGGCGCTGACGTCAATGCTATGGACAATACAGGATTTACTCCACTCCACCTCGCCGCCCTTAGGGGTCATTTGGAGATCGTTGAGGTCCTTCTCAAGAATGGGGCGGACGTCAATGCCCAGGACAGGACTGGGCGGACACCACTCCACCTTGCTGCTAAGCTCGGCCATCTGGAGATCGTTGAGGTATTGCTGAAGAATGGAGCCGACGTAAACGCCCAAGACAAA…
		RA2(PLCe)	339	ATGTCAGAGGAGGAGAGTTTCTTTGTCCAAGTGCATGATGTTTCTCCAGAGCAACCTCGAACAGTCATCAAAGCACCCCGCGTCAGCACTGCACAGGATGTCATTCAGCAGACCTTATGCAAAGCCAAATATTCCTACAGCATCCTGAGCAACCCCAATCCAAGCGACTATGTGCTTTTGGAAGAGGTGGTGAAAGACACTACCAACAAGAAGACTACCACACCAAAGTCCTCTCAGCGGGTCCTTCTGGATCAGGAGTGTGTGTTTCAAGCCCAAAGCAAGTGGAAAGGTGCAGGAAAATTCATCCTTAAGCTAAAGGAGCAGGTGCAGGCATCTCGC
		Rassf5c	795	ATGACCGTGGACAGCAGCATGAGCAGTGGGTACTGCAGCCTGGACGAGGAACTGGAAGACTGCTTCTTCACTGCTAAGACTACCTTTTTCAGAAATGCGCAGAGCAAACATCTTTCAAAGAATGTCTGTAAACCTGTGGAGGAGACACAGCGCCCGCCCACACTGCAGGAGATCAAGCAGAAGATCGACAGCTACAACACGCGAGAGAAGAACTGCCTGGGCATGAAACTGAGTGAAGACGGCACCTACACGGGTTTCATCAAAGTGCATCTGAAACTCCGGCGGCCTGTGACGGTGCCTGCTGGGATTCGGCCCCAGTCCATCTATGATGCCATCAAGGAGGTGAACCTGGCGGCTACCACGGACAAGCGGACATCCTTCTACCTGCCCCTAGATGCC…
		KRpep2d	60	ATGCGCCGCCGCCGCTGCCCGCTGTATATTAGCTATGATCCGGTGTGCCGCCGCCGCCGC
		RT11	357	ATGgaagtgcagctggtggaaagcggcggcggcctggtgcagccgggcggcagcctgcgcctgagctgcgcggcgagcggctttacctttagcagctatagcatgagctgggtgcgccaggcgccgggcaaaggcctggaatgggtgagctatattagccgcaccagccataccacctattatgcggatagcgtgaaaggccgctttaccattagccgcgataacagcaaaaacaccctgtatctgcagatgaacagcctgcgcgcggaagataccgcggtgtattattgcgcgcgcggcttttttagcattgtgatggattattggggccagggcaccctggtgaccgtgagcagc
		RBDCRD(BRAF)	408	ATGCCTATCGTTAGAGTCTTCCTGCCCAACAAACAGAGGACAGTGGTCCCTGCAAGGTGTGGAGTTACAGTCCGAGACAGTCTAAAGAAAGCACTGATGATGAGAGGTCTAATCCCAGAGTGCTGTGCTGTTTACAGAATCCAGGATGGAGAGAAGAAACCGATTGGTTGGGACACTGATATTTCCTGGCTTACTGGAGAAGAATTGCATGTGGAAGTGTTGGAGAATGTTCCACTTACAACACACAACTTTGTACGAAAAACGTTTTTCACCTTAGCATTTTGTGACTTTTGTCGAAAGCTGCTTTTCCAGGGTTTCCGCTGTCAAACATGTGGTTATAAATTTCACCAGCGTTGTAGTACAGAAGTTCCACTGATGTGTGTTAATTATGACCAACTT…
		RasIn2	264	ATGctggaagtgaaagaagcgagcccgaccagcattcagattagctggagcattgtgtttggcaaacatgattattatcgcattacctatggcgaaaccggcggcaacagcccggtgcaggaatttaccgtgccgggcagcaaaagcaccgcgaccattagcggcctgaaaccgggcgtggattataccattaccgtgtatgcggtgacctttcgctggccgaaacgccgcctggtgcgcccgattagcattaactatcgcacc
		iDab6	351	ATGGCCGAGGTGCAGCTGTTGGAGTCTGGGGGAGGCTTGGTACAGCCTGGGGGGTCCCTGAGACTCTCCTGTGCAGCCTCTGGATTCACCTTTAGTACCTTTAGCATGAACTGGGTCCGCCAGGCTCCAGGGAAGGGGCTGGAGTGGGTTTCATACATTAGTAGGACGTCGAAGACGATATACTATGCAGACTCTGTGAAGGGCCGATTCACCATCTCCAGAGACAATTCCAAGAACACACTGTATCTGCAAATGAACAGCCTGAGAGCCGAGGACACGGCTGTCTATTACTGTGCGAGAGGGAGATTCTTTGACTACTGGGGCCAGGGAACCCTGGTCACCGTTAGTTCT
	Linker
	flexible (GGGGS)n	1x	15	GGAGGCGGTGGCTCG
		3x	45	GGAGGCGGTGGCagcggaggcgggggtagtggcggcggtggaTCG
		6x	90	GGAGGCGGTGGCagcggaggcgggggtagtggcggcggtggaagcgggggtggaggctcgggtggcggaggtagcggaggcggtggaTCG
		9x	135	GGAGgtggcgggtctggaggcgggggtagtggcggcggtggaagcGGgggtggaggctcgggtggcggaggtagcggaggcggtggaAGTGGAGGAGGCGGGTCTGGAGGCGGAGGTAGTGGCGGCGGTGGATCG
		12x	180	GGAGgtggcgggtctggaggcgggggtagtggtggaggcgggtctggaggagggggtagtggcggcggtggaagcggcggcggtggaagcgggggtggaggctcgggtggcggaggtagcggaggcggtggaagtggaggaggcgggtctggaggcggaggtagtggcggcggtggatcG
	rigid (EAAAK)n	1x	18	ggagAAGCCGCTGCAAAG
		3x	48	ggaGAAGCCGCTGCAAAGGAAGCTGCAGCTAAGGAAGCAGCTGCCAAG
		6x	93	ggaGAAGCCGCTGCAAAGGAAGCTGCAGCTAAGGAAGCAGCTGCCAAGGaagcCGCTGCAAAGGAAGCTGCAGCTAAGGAAGCAGCTGCCAAG
		9x	138	ggaGAGGCAGCTGCAAAGGAAGCTGCAGCTAAGGAAGCAGCTGCCAAGGaagcCGCTGCAAAGGAAGCTGCAGCTAAGGAAGCAGCTGCCAAGGaagcCGCTGCAAAGGAAGCTGCAGCTAAGGAAGCAGCTGCCAAG
	NarL		648	atgtccaatcaggaacccgcgacaattctgctgatcgacgatcaccccatgctgcggaccggggtaaagcaacttatctcgatggcacccgacatcacagtcgtcggagaggcgtcgaatggagaacagggcatcgaacttgcggagagcctggaccctgaccttatcctcctcgacttgaatatgccagggatgaacggattggaaacactcgacaagctgcgggagaaatcgttgtcggggaggatcgtggtattctcagtgtcaaaccatgaggaagatgtcgtgacggcactcaagaggggtgccgacggatacttgttgaaagacatggagccggaggacctgttgaaggcgcttcaccaagccgcagctggagaaatggtgttgtcagaggcg…
	Transactivation Domain
		VP48	129	ggtccggcagatgcccttgatgacttcgatttggacatgctcccagcggatgccttggacgattttgatctcgatatgcttcccgccgacgcactcgatgatttcgatctggatatgctcccgggttga
		F.L.T.	456	CACGAGAAGTTCCCCAGCGACCTGGACCTGGACATGTTCAACGGCAGCCTGGAGTGCGACATGGAGAGCATCATCAGAAGCGAGCTGATGGACGCCGACGGCCTGGACTTCAACTTCGACAGCGAGGCCCAGAACGTGAGCAGCCACGTGCCCTACCCCGTGGCCCTGCACGTGAACATCGTGAACGTGCCCCAGCCCGCCGCCGCCGCCATCCAGAGACACTACAACGACGAGGACCCCGAGAAGGAGAAGAGAATCAAGGAGCTGGAGCTGCTGCTGATGAGCACCGAGAACGAGCTGAAGGGCCAGCAGGTGCTGCCCACCCAGAACCACACCTGCAGCTACCCCGGCTGGCACAGCACCCCGGGGCTCCCCAATGGCCTCCTTTCAGGAGATGAA…
		RelA	630	CCCAAGCCAGCACCCCAGCCCTATCCCTTTACGTCATCCCTGAGCACCATCAACTATGATGAGTTTCCCACCATGGTGTTTCCTTCTGGGCAGATCAGCCAGGCCTCGGCCTTGGCCCCGGCCCCTCCCCAAGTCCTGCCCCAGGCTCCAGCCCCTGCCCCTGCTCCAGCCATGGTATCAGCTCTGGCCCAGGCCCCAGCCCCTGTCCCAGTCCTAGCCCCAGGCCCTCCTCAGGCTGTGGCCCCACCTGCCCCCAAGCCCACCCAGGCTGGGGAAGGAACGCTGTCAGAGGCCCTGCTGCAGCTGCAGTTTGATGATGAAGACCTGGGGGCCTTGCTTGGCAACAGCACAGACCCAGCTGTGTTCACAGACCTGGCATCCGTCGACAACTCCGAGTTT…
	NarL response element		43	TACCCCTATAGGGGTATAGCGCCGGCTACCCCTATAGGGGTAT
	MAPK response elements
		12x(PY2)	147	CAGGAAGTGACTAACCAGGAAGTGACTAACCAGGAAGTGACTAACGCTAGCCAGGAAGTGACTAACCAGGAAGTGACTAACCAGGAAGTGACTAACACCGGTCAGGAAGTGACTAACCAGGAAGTGACTAACCAGGAAGTGACTAAC
		12x(SRE)	240	acaggatgtccatattaggACCGGAAGTccatattaggacaggatgtccatattaggACCGGAAGTccatattaggGCTAGCacaggatgtccatattaggACCGGAAGTccatattaggacaggatgtccatattaggACCGGAAGTccatattaggACCGGTacaggatgtccatattaggACCGGAAGTccatattaggacaggatgtccatattaggACCGGAAGTccatattagg
		3x(pFos)	204	gagcagttcccgtcaatccctccccccttacacaggatgtccatattaggacatctgcgtcagcGCTAGCgagcagttcccgtcaatccctccccccttacacaggatgtccatattaggacatctgcgtcagcACCGGTgagcagttcccgtcaatccctccccccttacacaggatgtccatattaggacatctgcgtcagc
		12x(AP1)	96	TGACTCATGAGTCATGACTCATGAGTCAGCTAGCTGACTCATGAGTCATGACTCATGAGTCAACCGGTTGACTCATGAGTCATGACTCATGAGTCA
		12x(Elk)	147	acaggaagtaccggaagtaccggaagtaccggaagtaccggaagtGCTAGCacaggaagtaccggaagtaccggaagtaccggaagtaccggaagtACCGGTacaggaagtaccggaagtaccggaagtaccggaagtaccggaagt
		12x(Myc)	156	AACCACGTGCTCGACCACGTGCTCAACCACGTGCTCGACCACGTGCTCGCTAGCAACCACGTGCTCGACCACGTGCTCAACCACGTGCTCGACCACGTGCTCACCGGTAACCACGTGCTCGACCACGTGCTCAACCACGTGCTCGACCACGTGCTC
	minimal Promoter	TATA	25	tctagagggtatataatgggggcca
	Output
		mCerulean	720	ATGGTGAGCAAGGGCGAGGAGCTGTTCACCGGGGTGGTGCCCATCCTGGTCGAGCTGGACGGCGACGTAAACGGCCACAAGTTCAGCGTGTCCGGCGAGGGCGAGGGCGATGCCACCTACGGCAAGCTGACCCTGAAGTTCATCTGCACCACCGGCAAGCTGCCCGTGCCCTGGCCCACCCTCGTGACCACCCTGACCTGGGGCGTGCAGTGCTTCGCCCGCTACCCCGACCACATGAAGCAGCACGACTTCTTCAAGTCCGCCATGCCCGAAGGCTACGTCCAGGAGCGCACCATCTTCTTCAAGGACGACGGCAACTACAAGACCCGCGCCGAGGTGAAGTTCGAGGGCGACACCCTGGTGAACCGCATCGAGCTGAAGGGCATCGACTTCAAGGAG…
		mEGFP	720	ATGGTGTCAAAGGGAGAAGAATTATTCACAGGTGTGGTTCCGATTTTGGTCGAACTCGACGGAGATGTCAATGGCCATAAATTTTCAGTGTCAGGTGAAGGCGAAGGCGACGCCACCTACGGCAAGCTGACCCTGAAGTTTATTTGCACCACCGGCAAACTCCCTGTTCCCTGGCCCACCTTAGTTACGACCTTAACTTATGGCGTACAATGCTTCTCAAGGTACCCAGATCATATGAAACAACATGACTTCTTTAAAAGTGCAATGCCCGAAGGTTACGTCCAAGAAAGAACTATTTTCTTCAAAGATGACGGGAATTACAAAACTCGGGCGGAAGTGAAATTTGAAGGGGATACACTTGTCAATCGCATAGAGCTTAAAGGTATCGACTTCAAGGAA…
		HSV-TK(A168H)	1131	ATGGCCTCTTATCCTTGTCACCAGCATGCTTCCGCCTTTGATCAAGCAGCCCGCTCACGGGGACACTCTAATAGGCGAACCGCTCTCCGTCCACGGCGTCAACAGGAAGCGACAGAGGTGCGATTGGAACAAAAGATGCCAACCCTGCTCAGGGTCTACATTGATGGCCCCCAcGGCATGGGCAAGACAACTACAACACAGCTTCTCGTCGCATTAGGCAGTCGGGATGACATAGTTTATGTGCCTGAACCTATGACCTATTGGCAAGTCCTTGGCGCGTCTGAAACCATTGCTAATATATATACTACTCAGCATCGGCTGGATCAGGGCGAAATCAGCGCTGGAGATGCCGCTGTCGTGATGACGTCCGCTCAAATTACaATGGGTATGCCATACGCT…
