# Supplementary material for: Synthetic gene circuits that selectively target RAS-driven cancers
Source: eLife. 2026 Feb 24;14:RP104320. doi: 10.7554/eLife.104320 (PMC12931925; doi:10.7554/eLife.104320)
Supplement: Supplementary file 4. [file elife-104320-supp4.xlsx]

## Sheet: Table S4
			Supplementary Table 4: Transfections and Experimental Layout
				Measured using	Transfection in	Cell Line(s)	Condition
								RAS plasmid		NarX Plasmid(s)		NarL Plasmid		Output Plasmid		Tansfection Ctrl
								ID	amount/well [ng]	ID	amount/well [ng]	ID	amount/well [ng]	ID	amount/well [ng]	ID	amount/well [ng]
			Figure 1
			c	Flow Cytometry	96-well plate	HEK-293	KRASg12d	pGS030	15	pGS070 & pGS071	each 30 ng	pMZ248	7.5	pMZ219	30	pKH026	30
							KRASwt	pGS029	15	"	"	"	"	"	"	"	"
			d	Flow Cytometry	96-well plate	HEK-293	WT	pGS030	1.67	pGS074 & pGS075	0, 7.5, 15, 30, 60 & 120 ng	pMZ248	7.5	pMZ219	30	pKH026	30
							R89L	"	"	pGS160 & pGS161	0, 7.5, 15, 30, 60 & 120 ng	"	"	"	"	"	"
							C168S	"	"	pGS341 & pGS342	0, 7.5, 15, 30, 60 & 120 ng	"	"	"	"	"	"
							R89L & C168S	"	"	pGS343 & pGS344	0, 7.5, 15, 30, 60 & 120 ng	"	"	"	"	"	"
							Junk	"	"	pBH265	0, 15, 30, 60, 120 & 240 ng	"	"	"	"	"	"
			e	Flow Cytometry	96-well plate	HEK-293	KRASg12d	pGS030	0.56, 1.67, 5, 15, 45 ng	pGS074 & pGS075	each 30 ng	pMZ248	7.5	pMZ219	30	pKH026	30
							KRASwt	pGS029	0.56, 1.67, 5, 15, 45 ng	"	"	"	"	"	"	"	"
							Junk	pBH265	0.56, 1.67, 5, 15, 45 ng	"	"	"	"	"	"	"	"
			f	Flow Cytometry	96-well plate	HEK-293	KRASg12d	pGS030	0, 0.19, 0.56, 1.67, 5, 15 ng	pGS074 & pGS075	each 30 ng	pMZ248	7.5	pMZ219	30	pKH026	30
							KRASwt	pGS029	0, 0.19, 0.56, 1.67, 5, 15 ng	"	"	"	"	"	"	"	"
							KRASwt & Sos-1	pGS029 & pGS034	0, 0.19, 0.56, 1.67, 5, 15 ng of pGS029 & always 15 ng of pGS034	"	"	"	"	"	"	"	"
				RAS-GTP pulldown ELISA	6-well plate	HEK-293	KRASg12d	pGS030	0, 3.7, 11.1, 33.3, 100, 300 ng	pBH265	600	pBH265	150	pBH265	600	pBH265	600
							KRASwt	pGS029	0, 3.7, 11.1, 33.3, 100, 300 ng	"	"	"	"	"	"	"	"
							KRASwt & Sos-1	pGS029 & pGS034	0, 3.7, 11.1, 33.3, 100, 300 ng & always 300 ng of pGS034	"	"	"	"	"	"	"	"
			g	Flow Cytometry	96-well plate	HEK-293	KRASwt	pGS029	0.56, 1.67, 5, 15, 45 ng	pGS074 & pGS075	each 30 ng	pLN007	7.5	pMZ219	30	pKH026	30
							KRASg12c	pGS326	0.56, 1.67, 5, 15, 45 ng	"	"	"	"	"	"	"	"
							KRASg12d	pGS030	0.56, 1.67, 5, 15, 45 ng	"	"	"	"	"	"	"	"
							KRASg12v	pGS327	0.56, 1.67, 5, 15, 45 ng	"	"	"	"	"	"	"	"
							KRASg13d	pGS329	0.56, 1.67, 5, 15, 45 ng	"	"	"	"	"	"	"	"
							KRASq61h	pGS330	0.56, 1.67, 5, 15, 45 ng	"	"	"	"	"	"	"	"
							NRASwt	pGS331	0.56, 1.67, 5, 15, 45 ng	"	"	"	"	"	"	"	"
							NRASg12d	pGS332	0.56, 1.67, 5, 15, 45 ng	"	"	"	"	"	"	"	"
							HRASwt	pGS333	0.56, 1.67, 5, 15, 45 ng	"	"	"	"	"	"	"	"
							HRASg12d	pGS334	0.56, 1.67, 5, 15, 45 ng	"	"	"	"	"	"	"	"
			Figure 2
			a	Flow Cytometry	24-well plate	HEK-293	Junk	pBH265	56	pGS146	225					pJD146	112.5
							KRASg12d	pGS030	6.5	"	"					"	"
							KRASwt	pGS029	6.5	"	"					"	"
							NF1	pGS031	56	"	"					"	"
							Sos-1	pGS034	56	"	"					"	"
			b/e	Confocal Microscopy	24-well plate	HEK-293	Junk	pBH265	56	pGS146	225					pJD146	112.5
							KRASg12d	pGS030	6.5	"	"					"	"
					re-seeded 36h after transfection to 8-well glas bottom slide		KRASwt	pGS029	6.5	"	"					"	"
							NF1	pGS031	56	"	"					"	"
							Sos-1	pGS034	56	"	"					"	"
			c	Flow Cytometry	96-well plate	HEK-293	Junk	pBH265	30	pGS311&pGS313	each 60 ng					pCS187	60
							KRASg12d	pGS030	3.33	"	"					"	"
							KRASwt	pGS029	3.33	"	"					"	"
							NF1	pGS031	30	"	"					"	"
							Sos-1	pGS034	30	"	"					"	"
			d	Flow Cytometry	96-well plate	HEK-293	Junk	pBH265	15	pGS074 & pGS075	each 30 ng	pMZ248	7.5	pMZ219	30	pKH026	30
							KRASg12d	pGS030	1.67	"	"	"	"	"	"	"	"
							KRASwt	pGS029	1.67	"	"	"	"	"	"	"	"
							NF1	pGS031	15	"	"	"	"	"	"	"	"
							Sos-1	pGS034	15	"	"	"	"	"	"	"	"
			Figure 3
			b	Flow Cytometry	96-well plate	HEK-293	1x flex	pGS029 or pGS030	15	pGS070 & pGS071	each 30 ng	pMZ248	7.5	pMZ219	30	pKH026	30
							3x flex	"	"	pGS072 & pGS073	each 30 ng	"	"	"	"	"	"
							6x flex	"	"	pGS074 & pGS075	each 30 ng	"	"	"	"	"	"
							9x flex	"	"	pGS188 & pGS189	each 30 ng	"	"	"	"	"	"
							12x flex	"	"	pGS190 & pGS191	each 30 ng	"	"	"	"	"	"
							1x rigid	"	"	pGS198 & pGS199	each 30 ng	"	"	"	"	"	"
							3x rigid	"	"	pGS200 & pGS201	each 30 ng	"	"	"	"	"	"
							6x rigid	"	"	pGS202 & pGS203	each 30 ng	"	"	"	"	"	"
							9x rigid	"	"	pGS218 & pGS219	each 30 ng	"	"	"	"	"	"
			c	Flow Cytometry	96-well plate	HEK-293	RA(Rassf5)	pGS029, pGS030 or pGS031	15	pLN037 & pLN038	each 30 ng	pMZ248	7.5	pMZ219	30	pKH026	30
							K55	"	"	pLN035 & pLN036	"	"	"	"	"	"	"
							RA2(PCLe)	"	"	pLN039 & pLN040	"	"	"	"	"	"	"
							RBDCRD	"	"	pGS074 & pGS075	"	"	"	"	"	"	"
							Rassf5c	"	"	pLN043 & pLN044	"	"	"	"	"	"	"
							KRpep2d	"	"	pLN047 & pLN048	"	"	"	"	"	"	"
							RT11	"	"	pLN045 & pLN046	"	"	"	"	"	"	"
							RBDCRD(BRAF)	"	"	pLN029 & pLN030	"	"	"	"	"	"	"
							RasIn2	"	"	pLN041 & pLN042	"	"	"	"	"	"	"
							iDab6	"	"	pLN031 & pLN032	"	"	"	"	"	"	"
			d	Flow Cytometry	96-well plate	HEK-293	VP48	pGS029, pGS030 or pGS031	15	pGS074 & pGS075	each 30 ng	pMZ248	7.5	pMZ219	30	pKH026	30
							F.L.T.	"	"	"	"	pLN007	7.5	"	"	"	"
							RelA	"	"	"	"	pLN008	7.5	"	"	"	"
			Figure 4							MAPK-TF RE		TF
			c	Flow Cytometry	96-well plate	HEK-293	PIR-Ctrl	pGS029 or pGS030	15	pLN056	30					pCS187	30
							PY2-RE	"	"	pLN058	30					"	"
							SRE-RE	"	"	pLN062	30					"	"
							pFos-RE	"	"	pLN057	30					"	"
							AP1-RE	"	"	pLN059	30					"	"
							Elk-RE	"	"	pLN060	30					"	"
							Myc-RE	"	"	pLN061	30					"	"
							Elk-RE + Elk-1	"	"	pLN060	30	pLN017	7.5			"	"
							Myc-RE + Myc	"	"	pLN061	30	pLN021	7.5			"	"
			d	Flow Cytometry	96-well plate	HEK-293	SRE-RE	pGS029, pGS030 or pBH265	0.56, 1.67, 5, 15, 45 ng	pLN062	30					pCS187	30
							pFos-RE	"	"	pLN057	30					"	"
							PY2-RE	"	"	pLN058	30					"	"
			e	Flow Cytometry	96-well plate	HEK-293	Elk-RE	pGS029, pGS030 or pBH265	0.56, 1.67, 5, 15, 45 ng	pLN060	30	pLN017	7.5			pCS187	30
			f	Flow Cytometry	96-well plate	HEK-293	all samples:	pGS029 or pGS030	1.67					pMZ219	30	pKH026	30
						Each of the RE_NarX plasmids was combined with each of the RE_NarL plasmids	RE_NarX plasmid (RE expressing the NarX-Fusion proteins):
							EF1a			pGS074 & pGS075	each 30 ng
							pFos			pLN082 & pLN087	each 1.5 ng
							PY2			pLN083 & pLN088	each 1.5 ng
							SRE			pLN085 & pLN090	each 0.38 ng
							RE_NarL plasmid (RE expressing the NarL-VP48 protein):
							EF1a					pMZ248	7.5
							pFos					pLN122	1.5
							PY2					pLN123	2
							SRE					pLN125	1
			Figure 5
			a-c		96-well plate	HEK-293	see Supplementary Table 5
			d		96-well plate	HEK-293	RAS_Sensor_F.L.T.	pGS029 or pGS030	1.67	pGS074 & pGS075	each 30 ng	pLN007	7.5	pMZ219	30	pKH026	30
							PY2_NarL-F.L.T.	"	"	pGS074 & pGS075	each 30 ng	pLN123	3	"	"	"	"
							PY2_NarX_F.L.T.	"	"	pLN083 & pLN088	each 1.5 ng	pLN007	7.5	"	"	"	"
							PY2_all_F.L.T.	"	"	pLN083 & pLN088	each 1.5 ng	pLN123	3	"	"	"	"
			Figure 6
					24-well plate
			a			HCT-116 wildtype (0.25x DNA)	Mutated Sensor			pGS160 & pGS161	each 150 ng	pMZ248	40	pMZ219	150	pKH026	150
						HCT-116 KRAS k.o. (1x DNA)	RAS Sensor			pGS074 & pGS075	each 150 ng	"	"	"	"	"	"
			b		96-well plate	HCT-116 wildtype (0.5x DNA)	VP48			pGS074 & pGS075	each 30 ng	pMZ248	7.5	pMZ219	30	pKH026	30
						HCT-116 KRAS k.o. (1x DNA)	F.L.T.			"	"	pLN007	7.5	"	"	"	"
			c		96-well plate	HCT-116 wildtype (0.3x DNA)	pFos			pLN057	3.75					pCS187	30
						HCT-116 KRAS k.o. (1x DNA)	SRE			pLN062	3.75					"	"
							PY2			pLN058	3.75					"	"
			d/e		96-well plate	HCT-116 wildtype (0.5x DNA)	PY2_NarL-F.L.T._3xrL			pGS200 & pGS201	each 30 ng	pLN069	7.5	pMZ219	30	pKH026	30
						HCT-116 KRAS k.o. (1x DNA)	RAS_Sensor_F.L.T.			pGS074 & pGS075	each 30 ng	pLN007	7.5	"	"	"	"
							PY2_NarL-F.L.T.			pGS074 & pGS075	each 30 ng	pLN069	7.5	"	"	"	"
							PY2_all_F.L.T.			pLN083 & pLN088	each 1.5 ng	pLN069	7.5	"	"	"	"
							PY2_NarX_F.L.T.			pLN083 & pLN088	each 1.5 ng	pLN007	7.5	"	"	"	"
			Figure 7
			a & b		24-well plate	A-549 (1.5x DNA)	RAS_Sensor F.L.T.			pGS074 & pGS075	each 89 ng	pLN007	44.5	pMZ219	178	pKH026	178
						AsPC-1 (1.5x DNA)	pFos_NarL-F.L.T.			pGS074 & pGS075	each 89 ng	pLN068	44.5	"	"	"	"
						HCT-116 wildtype (0.5x DNA)	SRE_NarL-F.L.T.			pGS074 & pGS075	each 89 ng	pLN073	44.5	"	"	"	"
						HeLa (1.5x DNA)	PY2_NarL-F.L.T.			pGS074 & pGS075	each 89 ng	pLN069	44.5	"	"	"	"
						HT-29 (1.5x DNA)	PY2_all_F.L.T.			pLN083 & pLN088	each 35.5 ng	pLN069	18	"	"	"	"
						Igrov-1 (1x DNA)	Mutated_Sensor_F.L.T.			pGS343 & pGS344	each 89 ng	pLN007	44.5	"	"	"	"
						K-562 (1.5x DNA)
						LoVo (1.5x DNA)
						MCF-7 (1.5x DNA)
						SKOV-3 (1.5x DNA)
						SW480 (1.5x DNA)
						SW620 (1.5x DNA)
			Figure 8
			a-c		96-well plate	HCT-116 wildtype (1x DNA)	RAS_Sensor F.L.T.			pGS074 & pGS075	each 15 ng	pLN007	7.5	pGS390	30	pKH026	30
							PY2_NarL-F.L.T.			pGS074 & pGS075	each 15 ng	pLN069	7.5	"	"	"	"
							GFP-Circuit			pLN083 & pLN088	each 6 ng	pLN069	3	pGS389	"	"	"
							Ef1a_HSV-TK							pPMT204	15	"	"
			d-f		96-well plate	Igrov-1 (1x DNA)	RAS_Sensor F.L.T.			pGS074 & pGS075	each 15 ng	pLN007	7.5	pGS390	30	pKH026	30
							PY2_NarL-F.L.T.			pGS074 & pGS075	each 15 ng	pLN069	7.5	"	"	"	"
							GFP-Circuit			pLN083 & pLN088	each 6 ng	pLN069	3	pGS389	"	"	"
							Ef1a_HSV-TK							pPMT204	15	"	"
			g-i		96-well plate	SW620 (1.5x DNA)	RAS_Sensor F.L.T.			pGS074 & pGS075	each 22.5 ng	pLN007	11.25	pGS390	45	pKH026	45
							PY2_NarL-F.L.T.			pGS074 & pGS075	each 22.5 ng	pLN069	11.25	"	"	"	"
							GFP-Circuit			pLN083 & pLN088	each 9 ng	pLN069	4.5	pGS389	"	"	"
							Ef1a_HSV-TK							pPMT204	22.25	"	"
			j-l		96-well plate	HCT-116 (0.5x DNA)	RAS_Sensor F.L.T.			pGS074 & pGS075	each 7.5 ng	pLN007	3.75	pGS390	15	pKH026	15
							PY2_NarL-F.L.T.			pGS074 & pGS075	each 7.5 ng	pLN069	3.75	"	"	"	"
							GFP-Circuit			pLN083 & pLN088	each 3 ng	pLN069	1.5	pGS389	"	"	"
							Ef1a_HSV-TK							pPMT204	7.5	"	"
