# Supplementary material for: Synthetic gene circuits that selectively target RAS-driven cancers
Source: eLife. 2026 Feb 24;14:RP104320. doi: 10.7554/eLife.104320 (PMC12931925; doi:10.7554/eLife.104320)
Supplement: Supplementary file 5. [file elife-104320-supp5.xlsx]

## Sheet: Table S5
Supplementary Table 5: Transfections for Screening of Circuit Parts in Fig.5a-c
Sample			Transfected Plasmids							Sample Descriptors								Results for HEK-293 with KRASg12d							Results for HEK-293 with KRASg12d							Fold change (KRASg12d / KRASwt)
Experiment	SampleID		RAS Plasmid (for HEKg12d samples)	RAS Plasmid (for HEKwt samples)	NarX Plasmids	NarL Plasmid	Output Plasmid	Transfection Control		BD	Linker	TAD	RE_NarX	RE_NarL	Conc_NarX plasmid [ng/well]	Conc_NarL Plasmid [ng/well]		KRASg12d_RU	KRASg12d_RU_sd	KRASg12d_mCherry_percent	KRASg12d_mCherry_mean	KRASg12d_mCerulean_percent	KRASg12d_mCerulean_mean		KRASwt_RU	KRASwt_RU_sd	KRASwt_mCherry_percent	KRASwt_mCherry_mean	KRASwt_mCerulean_percent	KRASwt_mCerulean_mean		Ratio	Ratio_error
E59	E59_P1B2		pGS030 [1.67 ng]	pGS029 [1.67 ng]	pGS074 & pGS075 [each 30 ng]	pLN122 [15 ng]	pMZ219 [30 ng]	pKH026 [30 ng]		RBDCRD	6xfL	VP48	EF1a	pFos	30	15		0.00102035	2.02e-05	0.612	7321	0.03	152.667		0.000684307	0.000100343	0.630667	4099	0.0099	178.667		1.49107	0.220622
E59	E59_P1B3		pGS030 [1.67 ng]	pGS029 [1.67 ng]	pGS074 & pGS075 [each 30 ng]	pLN122 [7.5 ng]	pMZ219 [30 ng]	pKH026 [30 ng]		RBDCRD	6xfL	VP48	EF1a	pFos	30	7.5		0.00185393	4.79e-05	0.663667	7252	0.0484333	184.667		0.000497076	7.7e-05	0.667667	4222	0.00826667	168.333		3.72966	0.585442
E59	E59_P1B4		pGS030 [1.67 ng]	pGS029 [1.67 ng]	pGS074 & pGS075 [each 30 ng]	pLN122 [3 ng]	pMZ219 [30 ng]	pKH026 [30 ng]		RBDCRD	6xfL	VP48	EF1a	pFos	30	2.5		0.00511806	0.000558981	0.665	7402.67	0.0834333	300.667		0.000202609	4.51e-05	0.635	4074.67	0.0048	109.7		25.2608	6.26618
E59	E59_P1B5		pGS030 [1.67 ng]	pGS029 [1.67 ng]	pGS074 & pGS075 [each 30 ng]	pLN122 [1 ng]	pMZ219 [30 ng]	pKH026 [30 ng]		RBDCRD	6xfL	VP48	EF1a	pFos	30	0.8		0.000177902	2.36e-05	0.682667	7290	0.00663333	134		5.75e-05	5.22e-06	0.653667	4345.67	0.00263333	62.2333		3.0915	0.496337
E59	E59_P1B6		pGS030 [1.67 ng]	pGS029 [1.67 ng]	pGS074 & pGS075 [each 30 ng]	pLN123 [17 ng]	pMZ219 [30 ng]	pKH026 [30 ng]		RBDCRD	6xfL	VP48	EF1a	PY2_	30	16.9		0.00429889	0.000666119	0.675667	7357.33	0.0794	266.333		0.000169047	5.55e-05	0.618667	3507.33	0.00353333	102.7		25.4302	9.22592
E59	E59_P1B7		pGS030 [1.67 ng]	pGS029 [1.67 ng]	pGS074 & pGS075 [each 30 ng]	pLN123 [11 ng]	pMZ219 [30 ng]	pKH026 [30 ng]		RBDCRD	6xfL	VP48	EF1a	PY2_	30	11.3		0.00512526	0.000425434	0.681333	7751.33	0.0899	298.667		0.000114284	1.01e-05	0.663333	4122	0.00373333	83.7667		44.8467	5.44325
E59	E59_P1B8		pGS030 [1.67 ng]	pGS029 [1.67 ng]	pGS074 & pGS075 [each 30 ng]	pLN123 [7.5 ng]	pMZ219 [30 ng]	pKH026 [30 ng]		RBDCRD	6xfL	VP48	EF1a	PY2_	30	7.5		0.0057223	0.000720303	0.723333	8550.67	0.100133	349		8.61e-05	1.07e-05	0.664333	4234.33	0.00316667	76.9333		66.469	11.7721
E59	E59_P1B9		pGS030 [1.67 ng]	pGS029 [1.67 ng]	pGS074 & pGS075 [each 30 ng]	pLN123 [5 ng]	pMZ219 [30 ng]	pKH026 [30 ng]		RBDCRD	6xfL	VP48	EF1a	PY2_	30	5		0.00549367	0.000180861	0.695	7774.67	0.0754333	391.333		6.16e-05	2.29e-05	0.667	4585	0.0029	63.2		89.1369	33.1909
E59	E59_P1E2		pGS030 [1.67 ng]	pGS029 [1.67 ng]	pGS074 & pGS075 [each 30 ng]	pLN125 [7.5 ng]	pMZ219 [30 ng]	pKH026 [30 ng]		RBDCRD	6xfL	VP48	EF1a	SRE_	30	7.5		0.00443161	0.000173812	0.639	8394	0.0856667	278.333		0.000365386	3.21e-05	0.650667	4898	0.00683333	171		12.1286	1.16637
E59	E59_P1E3		pGS030 [1.67 ng]	pGS029 [1.67 ng]	pGS074 & pGS075 [each 30 ng]	pLN125 [3 ng]	pMZ219 [30 ng]	pKH026 [30 ng]		RBDCRD	6xfL	VP48	EF1a	SRE_	30	2.5		0.00701429	0.000402946	0.697667	8412	0.0965333	425.667		0.00019785	7.47e-05	0.683333	5289.67	0.00503333	142.767		35.4526	13.5342
E59	E59_P1E4		pGS030 [1.67 ng]	pGS029 [1.67 ng]	pGS074 & pGS075 [each 30 ng]	pLN125 [1 ng]	pMZ219 [30 ng]	pKH026 [30 ng]		RBDCRD	6xfL	VP48	EF1a	SRE_	30	0.8		0.000214022	3.32e-05	0.733	7261.33	0.00706667	167.333		4.95e-05	1.65e-05	0.680333	4968	0.00246667	67.2667		4.3239	1.59265
E59	E59_P1E5		pGS030 [1.67 ng]	pGS029 [1.67 ng]	pGS074 & pGS075 [each 30 ng]	pLN125 [0.3 ng]	pMZ219 [30 ng]	pKH026 [30 ng]		RBDCRD	6xfL	VP48	EF1a	SRE_	30	0.3		0.00576145	0.000461434	0.652667	8360.33	0.0639667	491		0.000102054	1.75e-05	0.669	4718	0.0032	100.933		56.4548	10.6828
E59	E59_P1E6		pGS030 [1.67 ng]	pGS029 [1.67 ng]	pGS074 & pGS075 [each 30 ng]	pMZ248 [7.5 ng]	pMZ219 [30 ng]	pKH026 [30 ng]		RBDCRD	6xfL	VP48	EF1a	Ef1a	30	7.5		0.00930566	0.00130261	0.711667	8719.33	0.132	433		0.00112609	0.00017599	0.651333	4966.67	0.0195667	185.667		8.26372	1.73379
E59	E59_P1E7		pGS030 [1.67 ng]	pGS029 [1.67 ng]	pGS074 & pGS075 [each 30 ng]	pMZ248 [2 ng]	pMZ219 [30 ng]	pKH026 [30 ng]		RBDCRD	6xfL	VP48	EF1a	Ef1a	30	1.5		0.00635508	0.000423568	0.693	9021.33	0.0877	449.333		0.000394277	1.7e-05	0.658333	5152.33	0.00803333	166.333		16.1183	1.27924
E59	E59_P1E8		pGS030 [1.67 ng]	pGS029 [1.67 ng]	pGS074 & pGS075 [each 30 ng]	pMZ248 [0.3 ng]	pMZ219 [30 ng]	pKH026 [30 ng]		RBDCRD	6xfL	VP48	EF1a	Ef1a	30	0.3		0.00150376	0.000251709	0.73	8367.33	0.0306333	295.667		8.74e-05	2.83e-05	0.660667	4784.33	0.00356667	75.3667		17.2007	6.26503
E59	E59_P1E9		pGS030 [1.67 ng]	pGS029 [1.67 ng]	pGS074 & pGS075 [each 30 ng]	pMZ248 [0.1 ng]	pMZ219 [30 ng]	pKH026 [30 ng]		RBDCRD	6xfL	VP48	EF1a	Ef1a	30	0.1		0.000383419	2.56e-05	0.709667	7772.33	0.0102333	210		5.82e-05	8.64e-06	0.685667	4750.33	0.00306667	61.4		6.58751	1.07212
E59	E59_P2B2		pGS030 [1.67 ng]	pGS029 [1.67 ng]	pGS074 & pGS075 [each 30 ng]	pLN068 [7.5 ng]	pMZ219 [30 ng]	pKH026 [30 ng]		RBDCRD	6xfL	F.L.T.	EF1a	pFos	30	7.5		0.0267854	0.00116432	0.594	7524.67	0.149667	797		0.00340165	0.000571317	0.592	4370.33	0.0202	434.667		7.87425	1.36608
E59	E59_P2B3		pGS030 [1.67 ng]	pGS029 [1.67 ng]	pGS074 & pGS075 [each 30 ng]	pLN068 [3 ng]	pMZ219 [30 ng]	pKH026 [30 ng]		RBDCRD	6xfL	F.L.T.	EF1a	pFos	30	2.5		0.0446243	0.00251403	0.629333	7529.67	0.144667	1464.67		0.00162201	0.000645324	0.586667	4600.33	0.00963333	456.333		27.5118	11.0549
E59	E59_P2B4		pGS030 [1.67 ng]	pGS029 [1.67 ng]	pGS074 & pGS075 [each 30 ng]	pLN068 [1 ng]	pMZ219 [30 ng]	pKH026 [30 ng]		RBDCRD	6xfL	F.L.T.	EF1a	pFos	30	0.8		0.000285099	3.31e-05	0.596333	7315	0.0078	163.333		5.7e-05	1.39e-05	0.562	4753.67	0.00236667	64.1667		5.00563	1.35591
E59	E59_P2B5		pGS030 [1.67 ng]	pGS029 [1.67 ng]	pGS074 & pGS075 [each 30 ng]	pLN068 [0.3 ng]	pMZ219 [30 ng]	pKH026 [30 ng]		RBDCRD	6xfL	F.L.T.	EF1a	pFos	30	0.3		0.0434238	0.00293772	0.595667	7591	0.105533	1869		0.000485524	0.000121873	0.597667	4529.33	0.00523333	260.333		89.4369	23.2509
E59	E59_P2B6		pGS030 [1.67 ng]	pGS029 [1.67 ng]	pGS074 & pGS075 [each 30 ng]	pLN069 [17 ng]	pMZ219 [30 ng]	pKH026 [30 ng]		RBDCRD	6xfL	F.L.T.	EF1a	PY2_	30	16.9		0.0370607	0.00114149	0.604	6925	0.134	1160.67		0.00183538	0.000338221	0.569	3814	0.00863333	465.333		20.1924	3.77266
E59	E59_P2B7		pGS030 [1.67 ng]	pGS029 [1.67 ng]	pGS074 & pGS075 [each 30 ng]	pLN069 [11 ng]	pMZ219 [30 ng]	pKH026 [30 ng]		RBDCRD	6xfL	F.L.T.	EF1a	PY2_	30	11.3		0.046262	0.00411945	0.663	7893.33	0.162	1488		0.00104074	0.000244689	0.618333	4310	0.00713333	387.667		44.4509	11.1753
E59	E59_P2B8		pGS030 [1.67 ng]	pGS029 [1.67 ng]	pGS074 & pGS075 [each 30 ng]	pLN069 [7.5 ng]	pMZ219 [30 ng]	pKH026 [30 ng]		RBDCRD	6xfL	F.L.T.	EF1a	PY2_	30	7.5		0.0477476	0.00350354	0.619333	7817.67	0.144	1609.33		0.000784992	0.000274448	0.570667	4461	0.00553333	357.667		60.8256	21.7291
E59	E59_P2B9		pGS030 [1.67 ng]	pGS029 [1.67 ng]	pGS074 & pGS075 [each 30 ng]	pLN069 [5 ng]	pMZ219 [30 ng]	pKH026 [30 ng]		RBDCRD	6xfL	F.L.T.	EF1a	PY2_	30	5		0.0502415	0.00450354	0.594	8834.67	0.136333	1925.67		0.000300306	5.44e-05	0.593667	4831	0.0038	229.667		167.301	33.8119
E59	E59_P2E2		pGS030 [1.67 ng]	pGS029 [1.67 ng]	pGS074 & pGS075 [each 30 ng]	pLN073 [7.5 ng]	pMZ219 [30 ng]	pKH026 [30 ng]		RBDCRD	6xfL	F.L.T.	EF1a	SRE_	30	7.5		0.0217073	0.000555849	0.606667	7715	0.157667	644.333		0.00648894	0.000703656	0.626667	4541.33	0.0361	511.333		3.34528	0.372737
E59	E59_P2E3		pGS030 [1.67 ng]	pGS029 [1.67 ng]	pGS074 & pGS075 [each 30 ng]	pLN073 [3 ng]	pMZ219 [30 ng]	pKH026 [30 ng]		RBDCRD	6xfL	F.L.T.	EF1a	SRE_	30	2.5		0.040423	0.00105801	0.686667	8382.67	0.177333	1313.33		0.00416446	0.000836509	0.610667	4953.33	0.0193667	655.667		9.70668	1.96625
E59	E59_P2E4		pGS030 [1.67 ng]	pGS029 [1.67 ng]	pGS074 & pGS075 [each 30 ng]	pLN073 [1 ng]	pMZ219 [30 ng]	pKH026 [30 ng]		RBDCRD	6xfL	F.L.T.	EF1a	SRE_	30	0.8		0.000255711	6.93e-05	0.637	7750	0.00756667	162.333		3.79e-05	5.82e-06	0.599333	4780	0.0017	64.4667		6.74207	2.1003
E59	E59_P2E5		pGS030 [1.67 ng]	pGS029 [1.67 ng]	pGS074 & pGS075 [each 30 ng]	pLN073 [0.3 ng]	pMZ219 [30 ng]	pKH026 [30 ng]		RBDCRD	6xfL	F.L.T.	EF1a	SRE_	30	0.3		0.0514506	0.00302536	0.652333	8646.67	0.149	1942		0.00157789	0.00012553	0.608667	4682.33	0.00803333	562.667		32.6073	3.22576
E59	E59_P2E6		pGS030 [1.67 ng]	pGS029 [1.67 ng]	pGS074 & pGS075 [each 30 ng]	pLN007 [7.5 ng]	pMZ219 [30 ng]	pKH026 [30 ng]		RBDCRD	6xfL	F.L.T.	EF1a	Ef1a	30	7.5		0.0300061	0.00168505	0.660333	8544.67	0.0901	1885.67		0.00336515	0.000245767	0.629333	4658	0.0164667	598.333		8.91671	0.82147
E59	E59_P2E7		pGS030 [1.67 ng]	pGS029 [1.67 ng]	pGS074 & pGS075 [each 30 ng]	pLN007 [2 ng]	pMZ219 [30 ng]	pKH026 [30 ng]		RBDCRD	6xfL	F.L.T.	EF1a	Ef1a	30	1.5		0.0069529	0.000209873	0.636667	8484	0.0288667	1300.67		0.00072743	0.000149017	0.608	4942.67	0.00536667	408		9.55816	1.97916
E59	E59_P2E8		pGS030 [1.67 ng]	pGS029 [1.67 ng]	pGS074 & pGS075 [each 30 ng]	pLN007 [0.3 ng]	pMZ219 [30 ng]	pKH026 [30 ng]		RBDCRD	6xfL	F.L.T.	EF1a	Ef1a	30	0.3		0.00107479	0.000432991	0.623333	8404.67	0.011	500		0.000119451	4.11e-05	0.61	5053	0.0022	164.667		8.99779	4.76645
E59	E59_P2E9		pGS030 [1.67 ng]	pGS029 [1.67 ng]	pGS074 & pGS075 [each 30 ng]	pLN007 [0.1 ng]	pMZ219 [30 ng]	pKH026 [30 ng]		RBDCRD	6xfL	F.L.T.	EF1a	Ef1a	30	0.1		0.000328688	6.61e-05	0.646667	8217.67	0.0075	232.333		3.97e-05	9.5e-06	0.620667	5083.67	0.00186667	65.9		8.27659	2.58724
E59	E59_P3B2		pGS030 [1.67 ng]	pGS029 [1.67 ng]	pLN082 & pLN087 [each 45 ng]	pMZ248 [7.5 ng]	pMZ219 [30 ng]	pKH026 [30 ng]		RBDCRD	6xfL	VP48	pFos	EF1a	45	7.5		0.00484757	0.00023348	0.542	2098.67	0.0265667	207.667		0.00196176	0.000184976	0.556667	2007.67	0.0132	166.667		2.47103	0.261633
E59	E59_P3B3		pGS030 [1.67 ng]	pGS029 [1.67 ng]	pLN082 & pLN087 [each 30 ng]	pMZ248 [7.5 ng]	pMZ219 [30 ng]	pKH026 [30 ng]		RBDCRD	6xfL	VP48	pFos	EF1a	30	7.5		0.0108543	0.000850154	0.617	4005	0.0827333	322.667		0.00319545	0.000384261	0.617	3401	0.032	208.667		3.39679	0.487477
E59	E59_P3B4		pGS030 [1.67 ng]	pGS029 [1.67 ng]	pLN082 & pLN087 [each 20 ng]	pMZ248 [7.5 ng]	pMZ219 [30 ng]	pKH026 [30 ng]		RBDCRD	6xfL	VP48	pFos	EF1a	20	7.5		0.0168397	0.00109219	0.664	5741.33	0.144667	441		0.003073	0.000285859	0.673333	5051	0.0415667	250		5.47988	0.621425
E59	E59_P3B5		pGS030 [1.67 ng]	pGS029 [1.67 ng]	pLN082 & pLN087 [each 13 ng]	pMZ248 [7.5 ng]	pMZ219 [30 ng]	pKH026 [30 ng]		RBDCRD	6xfL	VP48	pFos	EF1a	13.3	7.5		0.0234183	0.00207201	0.737667	8393.33	0.227333	635.667		0.00145318	9.79e-05	0.703333	6215.33	0.0286333	220.333		16.1152	1.79206
E59	E59_P3B6		pGS030 [1.67 ng]	pGS029 [1.67 ng]	pLN083 & pLN088 [each 45 ng]	pMZ248 [7.5 ng]	pMZ219 [30 ng]	pKH026 [30 ng]		RBDCRD	6xfL	VP48	PY2_	EF1a	45	7.5		0.00991306	0.00106212	0.622	3065.33	0.0603	312		0.0017803	0.000192258	0.592	2100.33	0.0122	180		5.56821	0.847063
E59	E59_P3B7		pGS030 [1.67 ng]	pGS029 [1.67 ng]	pLN083 & pLN088 [each 30 ng]	pMZ248 [7.5 ng]	pMZ219 [30 ng]	pKH026 [30 ng]		RBDCRD	6xfL	VP48	PY2_	EF1a	30	7.5		0.0168957	0.00155918	0.709333	5608.33	0.144333	461		0.00264033	7.99e-05	0.667333	4102.33	0.0279667	257.333		6.3991	0.621484
E59	E59_P3B8		pGS030 [1.67 ng]	pGS029 [1.67 ng]	pLN083 & pLN088 [each 20 ng]	pMZ248 [7.5 ng]	pMZ219 [30 ng]	pKH026 [30 ng]		RBDCRD	6xfL	VP48	PY2_	EF1a	20	7.5		0.0230012	0.00233609	0.776333	8983.67	0.246	645.333		0.00146898	0.000125665	0.674333	5383.33	0.0208667	256.333		15.6579	2.07921
E59	E59_P3B9		pGS030 [1.67 ng]	pGS029 [1.67 ng]	pLN083 & pLN088 [each 13 ng]	pMZ248 [7.5 ng]	pMZ219 [30 ng]	pKH026 [30 ng]		RBDCRD	6xfL	VP48	PY2_	EF1a	13.3	7.5		0.0244092	0.00242661	0.724	10061.3	0.261	680.667		0.00134702	0.000182816	0.667	5911.33	0.0213	248		18.1209	3.04854
E59	E59_P3E2		pGS030 [1.67 ng]	pGS029 [1.67 ng]	pLN085 & pLN090 [each 45 ng]	pMZ248 [7.5 ng]	pMZ219 [30 ng]	pKH026 [30 ng]		RBDCRD	6xfL	VP48	SRE_	EF1a	45	7.5		0.00562846	0.000441165	0.653333	4043.33	0.0606	246		0.00211953	8.96e-05	0.633667	3664	0.0267333	184		2.65553	0.236464
E59	E59_P3E3		pGS030 [1.67 ng]	pGS029 [1.67 ng]	pLN085 & pLN090 [each 30 ng]	pMZ248 [7.5 ng]	pMZ219 [30 ng]	pKH026 [30 ng]		RBDCRD	6xfL	VP48	SRE_	EF1a	30	7.5		0.00785031	0.000738281	0.666	4888	0.0922667	276.333		0.00258196	0.000308949	0.693333	4337.33	0.0387	198.667		3.04044	0.462727
E59	E59_P3E4		pGS030 [1.67 ng]	pGS029 [1.67 ng]	pLN085 & pLN090 [each 20 ng]	pMZ248 [7.5 ng]	pMZ219 [30 ng]	pKH026 [30 ng]		RBDCRD	6xfL	VP48	SRE_	EF1a	20	7.5		0.0114181	0.000739417	0.702667	6531.67	0.144667	362.667		0.00286319	0.000422634	0.713	5998.67	0.0517333	234.333		3.9879	0.642811
E59	E59_P3E5		pGS030 [1.67 ng]	pGS029 [1.67 ng]	pLN085 & pLN090 [each 13 ng]	pMZ248 [7.5 ng]	pMZ219 [30 ng]	pKH026 [30 ng]		RBDCRD	6xfL	VP48	SRE_	EF1a	13.3	7.5		0.0145829	0.00101459	0.733667	7793	0.183	455.333		0.001637	0.000211954	0.745	7230.67	0.0406333	216		8.90833	1.3094
E59	E59_P3E6		pGS030 [1.67 ng]	pGS029 [1.67 ng]	pGS074 & pGS075 [each 45 ng]	pMZ248 [7.5 ng]	pMZ219 [30 ng]	pKH026 [30 ng]		RBDCRD	6xfL	VP48	Ef1a	EF1a	45	7.5		0.012223	0.0012729	0.719	6666.67	0.119667	484.667		0.00196239	0.000300601	0.687	4115.33	0.0264333	208.667		6.22866	1.15372
E59	E59_P3E7		pGS030 [1.67 ng]	pGS029 [1.67 ng]	pGS074 & pGS075 [each 30 ng]	pMZ248 [7.5 ng]	pMZ219 [30 ng]	pKH026 [30 ng]		RBDCRD	6xfL	VP48	Ef1a	EF1a	30	7.5		0.010672	0.00127519	0.672	9087	0.136667	472.333		0.00128825	0.000256874	0.674667	4933	0.0237667	179.667		8.28414	1.92572
E59	E59_P3E8		pGS030 [1.67 ng]	pGS029 [1.67 ng]	pGS074 & pGS075 [each 20 ng]	pMZ248 [7.5 ng]	pMZ219 [30 ng]	pKH026 [30 ng]		RBDCRD	6xfL	VP48	Ef1a	EF1a	20	7.5		0.00712022	0.000848763	0.72	9645.33	0.125333	390		0.000685402	0.000140123	0.701	5293	0.0154	163		10.3884	2.45846
E59	E59_P3E9		pGS030 [1.67 ng]	pGS029 [1.67 ng]	pGS074 & pGS075 [each 13 ng]	pMZ248 [7.5 ng]	pMZ219 [30 ng]	pKH026 [30 ng]		RBDCRD	6xfL	VP48	Ef1a	EF1a	13.3	7.5		0.0054271	0.000725016	0.753667	11049	0.121667	368		0.000394309	1.45e-05	0.731	6315.33	0.012	151.667		13.7636	1.90727
E59	E59_P4B2		pGS030 [1.67 ng]	pGS029 [1.67 ng]	pLN092 & pLN097 [each 45 ng]	pMZ248 [7.5 ng]	pMZ219 [30 ng]	pKH026 [30 ng]		RA	6xfL	VP48	pFos	EF1a	45	7.5		0.00030356	5.09e-05	0.565	2923	0.0058	86.3		0.000165111	3.47e-05	0.546667	2207	0.00273333	72.2333		1.83852	0.494461
E59	E59_P4B3		pGS030 [1.67 ng]	pGS029 [1.67 ng]	pLN092 & pLN097 [each 30 ng]	pMZ248 [7.5 ng]	pMZ219 [30 ng]	pKH026 [30 ng]		RA	6xfL	VP48	pFos	EF1a	30	7.5		0.00122923	0.00015505	0.638	7043	0.0406	136		0.000192391	1.59e-05	0.631667	5390.33	0.00653333	100.067		6.38922	0.96346
E59	E59_P4B4		pGS030 [1.67 ng]	pGS029 [1.67 ng]	pLN092 & pLN097 [each 20 ng]	pMZ248 [7.5 ng]	pMZ219 [30 ng]	pKH026 [30 ng]		RA	6xfL	VP48	pFos	EF1a	20	7.5		0.00134914	0.0001	0.618	7835.33	0.0469667	139		0.000156214	1.04e-05	0.697333	5880.67	0.00686667	93.4667		8.6365	0.860666
E59	E59_P4B5		pGS030 [1.67 ng]	pGS029 [1.67 ng]	pLN092 & pLN097 [each 13 ng]	pMZ248 [7.5 ng]	pMZ219 [30 ng]	pKH026 [30 ng]		RA	6xfL	VP48	pFos	EF1a	13.3	7.5		0.00225692	0.00020729	0.640667	9074.67	0.0737667	178		0.000147207	2.02e-05	0.655333	6673.33	0.00673333	94.5		15.3316	2.53127
E59	E59_P4B6		pGS030 [1.67 ng]	pGS029 [1.67 ng]	pLN093 & pLN098 [each 45 ng]	pMZ248 [7.5 ng]	pMZ219 [30 ng]	pKH026 [30 ng]		RA	6xfL	VP48	PY2_	EF1a	45	7.5		0.00595717	0.000294918	0.526	4113.67	0.0611	210.667		0.00042174	0.000126434	0.58	2660	0.0054	119.667		14.1252	4.29197
E59	E59_P4B7		pGS030 [1.67 ng]	pGS029 [1.67 ng]	pLN093 & pLN098 [each 30 ng]	pMZ248 [7.5 ng]	pMZ219 [30 ng]	pKH026 [30 ng]		RA	6xfL	VP48	PY2_	EF1a	30	7.5		0.00980722	0.00104503	0.649333	9004.67	0.173333	329.667		0.000500685	3.56e-05	0.613667	5161.67	0.0122667	129.667		19.5876	2.51019
E59	E59_P4B8		pGS030 [1.67 ng]	pGS029 [1.67 ng]	pLN093 & pLN098 [each 20 ng]	pMZ248 [7.5 ng]	pMZ219 [30 ng]	pKH026 [30 ng]		RA	6xfL	VP48	PY2_	EF1a	20	7.5		0.0104868	0.000946943	0.671667	10341.7	0.199667	364.333		0.000514505	2.69e-05	0.651667	5685.67	0.0121333	159		20.3823	2.12643
E59	E59_P4B9		pGS030 [1.67 ng]	pGS029 [1.67 ng]	pLN093 & pLN098 [each 13 ng]	pMZ248 [7.5 ng]	pMZ219 [30 ng]	pKH026 [30 ng]		RA	6xfL	VP48	PY2_	EF1a	13.3	7.5		0.010922	0.00060299	0.689667	12348	0.225667	412		0.000345172	5.03e-05	0.649	6768	0.0119	129.667		31.6423	4.93074
E59	E59_P4E2		pGS030 [1.67 ng]	pGS029 [1.67 ng]	pLN095 & pLN100 [each 45 ng]	pMZ248 [7.5 ng]	pMZ219 [30 ng]	pKH026 [30 ng]		RA	6xfL	VP48	SRE_	EF1a	45	7.5		0.00332734	7.53e-05	0.608	4799.33	0.0616667	158		0.00132416	8.37e-05	0.585	3545	0.0196333	140		2.51278	0.168761
E59	E59_P4E3		pGS030 [1.67 ng]	pGS029 [1.67 ng]	pLN095 & pLN100 [each 30 ng]	pMZ248 [7.5 ng]	pMZ219 [30 ng]	pKH026 [30 ng]		RA	6xfL	VP48	SRE_	EF1a	30	7.5		0.0068423	0.000410504	0.67	8125.33	0.155333	239.333		0.00143395	0.000127857	0.676	6547.67	0.0371333	171		4.77166	0.512808
E59	E59_P4E4		pGS030 [1.67 ng]	pGS029 [1.67 ng]	pLN095 & pLN100 [each 20 ng]	pMZ248 [7.5 ng]	pMZ219 [30 ng]	pKH026 [30 ng]		RA	6xfL	VP48	SRE_	EF1a	20	7.5		0.00768507	0.000363888	0.668	8597.67	0.169	260.667		0.00140942	9.7e-06	0.652333	6096	0.0318333	176		5.45267	0.260898
E59	E59_P4E5		pGS030 [1.67 ng]	pGS029 [1.67 ng]	pLN095 & pLN100 [each 13 ng]	pMZ248 [7.5 ng]	pMZ219 [30 ng]	pKH026 [30 ng]		RA	6xfL	VP48	SRE_	EF1a	13.3	7.5		0.0094845	0.000211703	0.658667	10652.7	0.209	318		0.000886345	9.85e-05	0.659667	7467.33	0.0285	153.667		10.7007	1.21263
E59	E59_P4E6		pGS030 [1.67 ng]	pGS029 [1.67 ng]	pLN037 & pLN038 [each 45 ng]	pMZ248 [7.5 ng]	pMZ219 [30 ng]	pKH026 [30 ng]		RA	6xfL	VP48	Ef1a	EF1a	45	7.5		0.00131882	0.000154958	0.668667	9014.33	0.0385667	206		6.88e-05	9.55e-06	0.642	4534.67	0.00286667	69.5333		19.1639	3.48378
E59	E59_P4E7		pGS030 [1.67 ng]	pGS029 [1.67 ng]	pLN037 & pLN038 [each 30 ng]	pMZ248 [7.5 ng]	pMZ219 [30 ng]	pKH026 [30 ng]		RA	6xfL	VP48	Ef1a	EF1a	30	7.5		0.00107919	2.58e-05	0.709333	11538.3	0.0412333	214		7.77e-05	3.04e-05	0.642333	5876.33	0.00303333	94.7333		13.8942	5.44316
E59	E59_P4E8		pGS030 [1.67 ng]	pGS029 [1.67 ng]	pLN037 & pLN038 [each 20 ng]	pMZ248 [7.5 ng]	pMZ219 [30 ng]	pKH026 [30 ng]		RA	6xfL	VP48	Ef1a	EF1a	20	7.5		0.000934715	0.000125025	0.673333	12564.7	0.0362	218.333		5.49e-05	1.32e-05	0.673	6182	0.00296667	77.3		17.0257	4.67646
E59	E59_P4E9		pGS030 [1.67 ng]	pGS029 [1.67 ng]	pLN037 & pLN038 [each 13 ng]	pMZ248 [7.5 ng]	pMZ219 [30 ng]	pKH026 [30 ng]		RA	6xfL	VP48	Ef1a	EF1a	13.3	7.5		0.000736102	0.000129208	0.729667	13769.7	0.0334	220		5.39e-05	9.15e-06	0.641667	7029	0.0031	78.5		13.6645	3.33729
E59	E59_P5B2		pGS030 [1.67 ng]	pGS029 [1.67 ng]	pLN102 & pLN107 [each 45 ng]	pMZ248 [7.5 ng]	pMZ219 [30 ng]	pKH026 [30 ng]		K55	6xfL	VP48	pFos	EF1a	45	7.5		0.00495396	0.000301682	0.543667	2712	0.0326667	224.667		0.000502421	8.72e-05	0.630667	2844.67	0.0067	134.333		9.86019	1.81385
E59	E59_P5B3		pGS030 [1.67 ng]	pGS029 [1.67 ng]	pLN102 & pLN107 [each 30 ng]	pMZ248 [7.5 ng]	pMZ219 [30 ng]	pKH026 [30 ng]		K55	6xfL	VP48	pFos	EF1a	30	7.5		0.0110396	0.0016065	0.6	3264	0.0665333	321		0.000491682	5.4e-05	0.668	3516.33	0.00783333	147		22.4527	4.09422
E59	E59_P5B4		pGS030 [1.67 ng]	pGS029 [1.67 ng]	pLN102 & pLN107 [each 20 ng]	pMZ248 [7.5 ng]	pMZ219 [30 ng]	pKH026 [30 ng]		K55	6xfL	VP48	pFos	EF1a	20	7.5		0.0153181	0.0016711	0.592333	4333	0.0950667	405.667		0.000450604	2.91e-05	0.689	4114.67	0.00763333	165.667		33.9945	4.3115
E59	E59_P5B5		pGS030 [1.67 ng]	pGS029 [1.67 ng]	pLN102 & pLN107 [each 13 ng]	pMZ248 [7.5 ng]	pMZ219 [30 ng]	pKH026 [30 ng]		K55	6xfL	VP48	pFos	EF1a	13.3	7.5		0.0166448	0.00358153	0.612667	4685.67	0.105667	440.667		0.000313657	6.75e-05	0.728667	4559	0.0065	159.667		53.0668	16.1505
E59	E59_P5B6		pGS030 [1.67 ng]	pGS029 [1.67 ng]	pLN103 & pLN108 [each 45 ng]	pMZ248 [7.5 ng]	pMZ219 [30 ng]	pKH026 [30 ng]		K55	6xfL	VP48	PY2_	EF1a	45	7.5		0.00917791	0.00204393	0.582333	2770.33	0.0505333	284.333		0.000774257	0.000111584	0.656333	2317	0.0068	173		11.8538	3.14441
E59	E59_P5B7		pGS030 [1.67 ng]	pGS029 [1.67 ng]	pLN103 & pLN108 [each 30 ng]	pMZ248 [7.5 ng]	pMZ219 [30 ng]	pKH026 [30 ng]		K55	6xfL	VP48	PY2_	EF1a	30	7.5		0.0120562	0.00209434	0.609333	4009.33	0.0795667	360.333		0.000771564	9.54e-05	0.674333	3305	0.0094	182.667		15.6257	3.33132
E59	E59_P5B8		pGS030 [1.67 ng]	pGS029 [1.67 ng]	pLN103 & pLN108 [each 20 ng]	pMZ248 [7.5 ng]	pMZ219 [30 ng]	pKH026 [30 ng]		K55	6xfL	VP48	PY2_	EF1a	20	7.5		0.0138824	0.00271527	0.668	6830	0.132333	465.333		0.000128086	7.66e-06	0.702667	4939.67	0.00436667	101.5		108.383	22.1679
E59	E59_P5B9		pGS030 [1.67 ng]	pGS029 [1.67 ng]	pLN103 & pLN108 [each 13 ng]	pMZ248 [7.5 ng]	pMZ219 [30 ng]	pKH026 [30 ng]		K55	6xfL	VP48	PY2_	EF1a	13.3	7.5		0.0149698	0.00227325	0.651667	6474	0.132	472		0.000226158	2.93e-05	0.709667	4752.33	0.00533333	140		66.192	13.2141
E59	E59_P5E2		pGS030 [1.67 ng]	pGS029 [1.67 ng]	pLN105 & pLN110 [each 45 ng]	pMZ248 [7.5 ng]	pMZ219 [30 ng]	pKH026 [30 ng]		K55	6xfL	VP48	SRE_	EF1a	45	7.5		0.00569738	0.00047635	0.603	3233.67	0.0464333	238.667		0.000611371	0.000206178	0.591667	2481	0.00566667	156		9.31903	3.23788
E59	E59_P5E3		pGS030 [1.67 ng]	pGS029 [1.67 ng]	pLN105 & pLN110 [each 30 ng]	pMZ248 [7.5 ng]	pMZ219 [30 ng]	pKH026 [30 ng]		K55	6xfL	VP48	SRE_	EF1a	30	7.5		0.0114753	0.00127599	0.648333	4180	0.0921	332		0.000769605	0.000113706	0.624	3455.33	0.00796667	207		14.9107	2.75719
E59	E59_P5E4		pGS030 [1.67 ng]	pGS029 [1.67 ng]	pLN105 & pLN110 [each 20 ng]	pMZ248 [7.5 ng]	pMZ219 [30 ng]	pKH026 [30 ng]		K55	6xfL	VP48	SRE_	EF1a	20	7.5		0.0148887	0.00169682	0.614667	3555	0.0797	404		0.000447708	6.94e-05	0.658667	3012.67	0.00526667	169.667		33.2553	6.40116
E59	E59_P5E5		pGS030 [1.67 ng]	pGS029 [1.67 ng]	pLN105 & pLN110 [each 13 ng]	pMZ248 [7.5 ng]	pMZ219 [30 ng]	pKH026 [30 ng]		K55	6xfL	VP48	SRE_	EF1a	13.3	7.5		0.019731	0.00209216	0.678	5544	0.140333	522.667		0.000362075	2.45e-05	0.646	4082	0.0056	174		54.4942	6.85627
E59	E59_P5E6		pGS030 [1.67 ng]	pGS029 [1.67 ng]	pLN035 & pLN036 [each 45 ng]	pMZ248 [7.5 ng]	pMZ219 [30 ng]	pKH026 [30 ng]		K55	6xfL	VP48	Ef1a	EF1a	45	7.5		0.00182243	0.000363299	0.667333	6610.67	0.0387	204		0.000218107	3.19e-05	0.682	3678	0.0036	153.667		8.35568	2.06704
E59	E59_P5E7		pGS030 [1.67 ng]	pGS029 [1.67 ng]	pLN035 & pLN036 [each 30 ng]	pMZ248 [7.5 ng]	pMZ219 [30 ng]	pKH026 [30 ng]		K55	6xfL	VP48	Ef1a	EF1a	30	7.5		0.001433	0.000374943	0.719667	6761.67	0.0351667	192.333		8.38e-05	1.66e-05	0.697667	4914	0.0031	92.9		17.107	5.61479
E59	E59_P5E8		pGS030 [1.67 ng]	pGS029 [1.67 ng]	pLN035 & pLN036 [each 20 ng]	pMZ248 [7.5 ng]	pMZ219 [30 ng]	pKH026 [30 ng]		K55	6xfL	VP48	Ef1a	EF1a	20	7.5		0.00108657	0.000266543	0.694333	7906.67	0.0311667	185		8.19e-05	1.43e-05	0.676333	4249	0.00256667	90.6		13.2709	3.99502
E59	E59_P5E9		pGS030 [1.67 ng]	pGS029 [1.67 ng]	pLN035 & pLN036 [each 13 ng]	pMZ248 [7.5 ng]	pMZ219 [30 ng]	pKH026 [30 ng]		K55	6xfL	VP48	Ef1a	EF1a	13.3	7.5		0.000771677	0.000219479	0.707	7487	0.0228333	173.333		5.95e-05	1.89e-05	0.669667	4679.33	0.0025	71.7667		12.9782	5.54161
E64	E64_P1A5		pGS030 [1.67 ng]	pGS029 [1.67 ng]	pGS074 & pGS075 [each 30 ng]	pMZ248 [7.5 ng]	pMZ219 [30 ng]	pKH026 [30 ng]		RBDCRD	6xfL	VP48	EF1a	EF1a	30	7.5		0.0161389	0.00289883	0.843125	10315.9	0.22775	606.5		0.00377429	0.000395282	0.73825	7212.38	0.0806625	249.625		4.27601	0.889069
E64	E64_P1B10		pGS030 [1.67 ng]	pGS029 [1.67 ng]	pGS074 & pGS075 [each 30 ng]	pLN073 [0.31 ng]	pMZ219 [30 ng]	pKH026 [30 ng]		RBDCRD	6xfL	F.L.T.	EF1a	SRE_	30	0.31		0.0253135	0.00338913	0.773333	4425	0.044	1981.33		0.000304133	9.55e-05	0.762667	3385.67	0.0033	243		83.2317	28.4169
E64	E64_P1B2		pGS030 [1.67 ng]	pGS029 [1.67 ng]	pGS074 & pGS075 [each 30 ng]	pLN068 [8.3 ng]	pMZ219 [30 ng]	pKH026 [30 ng]		RBDCRD	6xfL	F.L.T.	EF1a	pFos	30	8.3		0.0206294	0.00128411	0.725667	4218	0.0723	874.333		0.00090426	9.38e-05	0.739667	3244.33	0.0071	306.333		22.8136	2.76072
E64	E64_P1B3		pGS030 [1.67 ng]	pGS029 [1.67 ng]	pGS074 & pGS075 [each 30 ng]	pLN068 [2.77 ng]	pMZ219 [30 ng]	pKH026 [30 ng]		RBDCRD	6xfL	F.L.T.	EF1a	pFos	30	2.77		0.0331499	0.00318044	0.788	4760.33	0.0789	1587		0.000683109	0.000349207	0.746333	3190	0.0047	342.333		48.528	25.2407
E64	E64_P1B4		pGS030 [1.67 ng]	pGS029 [1.67 ng]	pGS074 & pGS075 [each 30 ng]	pLN068 [0.92 ng]	pMZ219 [30 ng]	pKH026 [30 ng]		RBDCRD	6xfL	F.L.T.	EF1a	pFos	30	0.92		0.0268913	0.00232831	0.746	4055.67	0.0420333	1946		0.000111477	4.91e-05	0.716667	3114.67	0.00263333	93		241.228	108.258
E64	E64_P1B5		pGS030 [1.67 ng]	pGS029 [1.67 ng]	pGS074 & pGS075 [each 30 ng]	pLN069 [5 ng]	pMZ219 [30 ng]	pKH026 [30 ng]		RBDCRD	6xfL	F.L.T.	EF1a	PY2_	30	5		0.0288674	0.00260766	0.763333	3747	0.0477667	1753		0.000173746	0.000105812	0.690333	2902.67	0.00293333	116.767		166.147	102.292
E64	E64_P1B6		pGS030 [1.67 ng]	pGS029 [1.67 ng]	pGS074 & pGS075 [each 30 ng]	pLN069 [1.67 ng]	pMZ219 [30 ng]	pKH026 [30 ng]		RBDCRD	6xfL	F.L.T.	EF1a	PY2_	30	1.67		0.0228848	0.000172954	0.796	4132.5	0.0375	2021		0.000136076	7.24e-05	0.74	3028	0.00285	99.9		168.176	89.5423
E64	E64_P1B7		pGS030 [1.67 ng]	pGS029 [1.67 ng]	pGS074 & pGS075 [each 30 ng]	pLN069 [0.56 ng]	pMZ219 [30 ng]	pKH026 [30 ng]		RBDCRD	6xfL	F.L.T.	EF1a	PY2_	30	0.56		0.012569	0.0010095	0.802333	4307.33	0.0222333	1961.67		8.76e-05	2.71e-05	0.742	3269.33	0.0025	101.967		143.469	45.7977
E64	E64_P1B8		pGS030 [1.67 ng]	pGS029 [1.67 ng]	pGS074 & pGS075 [each 30 ng]	pLN073 [2.8 ng]	pMZ219 [30 ng]	pKH026 [30 ng]		RBDCRD	6xfL	F.L.T.	EF1a	SRE_	30	2.8		0.0248007	0.000413495	0.722	3871.67	0.0734333	947.667		0.0014091	0.000221622	0.712667	3083	0.00853333	364		17.6004	2.78368
E64	E64_P1B9		pGS030 [1.67 ng]	pGS029 [1.67 ng]	pGS074 & pGS075 [each 30 ng]	pLN073 [0.93 ng]	pMZ219 [30 ng]	pKH026 [30 ng]		RBDCRD	6xfL	F.L.T.	EF1a	SRE_	30	0.93		0.0300783	0.00265112	0.793667	4791.33	0.0704333	1625.33		0.000598442	0.000138278	0.814333	3878.33	0.00696667	272		50.261	12.4297
E64	E64_P1E10		pGS030 [1.67 ng]	pGS029 [1.67 ng]	pGS074 & pGS075 [each 15 ng]	pLN073 [0.31 ng]	pMZ219 [30 ng]	pKH026 [30 ng]		RBDCRD	6xfL	F.L.T.	EF1a	SRE_	15	0.31		0.023039	0.00128824	0.757333	5180.33	0.0492667	1843.67		0.00020173	0.000121594	0.720667	3537	0.0027	180.667		114.207	69.1345
E64	E64_P1E2		pGS030 [1.67 ng]	pGS029 [1.67 ng]	pGS074 & pGS075 [each 15 ng]	pLN068 [8.3 ng]	pMZ219 [30 ng]	pKH026 [30 ng]		RBDCRD	6xfL	F.L.T.	EF1a	pFos	15	8.3		0.0132431	0.000581209	0.754	5121.67	0.0766667	670.333		0.00125176	0.000424221	0.763333	3624	0.0076	467.333		10.5795	3.61533
E64	E64_P1E3		pGS030 [1.67 ng]	pGS029 [1.67 ng]	pGS074 & pGS075 [each 15 ng]	pLN068 [2.77 ng]	pMZ219 [30 ng]	pKH026 [30 ng]		RBDCRD	6xfL	F.L.T.	EF1a	pFos	15	2.77		0.0235868	0.00109118	0.741667	4754.67	0.0633	1311		0.000285687	0.000125277	0.719333	3323.67	0.0037	184.667		82.5616	36.405
E64	E64_P1E4		pGS030 [1.67 ng]	pGS029 [1.67 ng]	pGS074 & pGS075 [each 15 ng]	pLN068 [0.92 ng]	pMZ219 [30 ng]	pKH026 [30 ng]		RBDCRD	6xfL	F.L.T.	EF1a	pFos	15	0.92		0.0262505	0.00131024	0.701333	4535.33	0.0448	1858.33		0.00015263	0.000107768	0.756	3512	0.0024	142.233		171.988	121.738
E64	E64_P1E5		pGS030 [1.67 ng]	pGS029 [1.67 ng]	pGS074 & pGS075 [each 15 ng]	pLN069 [5 ng]	pMZ219 [30 ng]	pKH026 [30 ng]		RBDCRD	6xfL	F.L.T.	EF1a	PY2_	15	5		0.0239603	0.00147567	0.7	3790	0.0412333	1547		0.000118023	5.35e-05	0.732667	3212.67	0.00196667	138.767		203.014	92.7918
E64	E64_P1E6		pGS030 [1.67 ng]	pGS029 [1.67 ng]	pGS074 & pGS075 [each 15 ng]	pLN069 [1.67 ng]	pMZ219 [30 ng]	pKH026 [30 ng]		RBDCRD	6xfL	F.L.T.	EF1a	PY2_	15	1.67		0.0214611	0.00208347	0.800667	5036.33	0.0460333	1873		6.48e-05	2.95e-05	0.802	3911.67	0.00226667	93.6333		331.095	154.057
E64	E64_P1E7		pGS030 [1.67 ng]	pGS029 [1.67 ng]	pGS074 & pGS075 [each 15 ng]	pLN069 [0.56 ng]	pMZ219 [30 ng]	pKH026 [30 ng]		RBDCRD	6xfL	F.L.T.	EF1a	PY2_	15	0.56		0.0147976	0.00171679	0.78	5250.67	0.0298667	2088.67		3.89e-05	1.11e-05	0.741	3646	0.00173333	58.8667		380.718	117.533
E64	E64_P1E8		pGS030 [1.67 ng]	pGS029 [1.67 ng]	pGS074 & pGS075 [each 15 ng]	pLN073 [2.8 ng]	pMZ219 [30 ng]	pKH026 [30 ng]		RBDCRD	6xfL	F.L.T.	EF1a	SRE_	15	2.8		0.0138721	0.00123995	0.673333	4320.33	0.0623667	687.667		0.00101244	0.000302461	0.723667	3318.33	0.0072	338.333		13.7016	4.2726
E64	E64_P1E9		pGS030 [1.67 ng]	pGS029 [1.67 ng]	pGS074 & pGS075 [each 15 ng]	pLN073 [0.93 ng]	pMZ219 [30 ng]	pKH026 [30 ng]		RBDCRD	6xfL	F.L.T.	EF1a	SRE_	15	0.93		0.0230879	0.00168229	0.691333	4390.67	0.0538667	1341		0.000518469	9.69e-05	0.729	3659.67	0.00423333	341.333		44.531	8.93142
E64	E64_P2B10		pGS030 [1.67 ng]	pGS029 [1.67 ng]	pGS200 & pGS201 [each 30 ng]	pLN073 [0.31 ng]	pMZ219 [30 ng]	pKH026 [30 ng]		RBDCRD	3xrL	F.L.T.	EF1a	SRE_	30	0.31		0.0389177	0.00404213	0.735667	4892.33	0.0687333	2069		0.00146336	0.00118064	0.754	3146.33	0.0049	703.667		26.5948	21.6338
E64	E64_P2B2		pGS030 [1.67 ng]	pGS029 [1.67 ng]	pGS200 & pGS201 [each 30 ng]	pLN068 [8.3 ng]	pMZ219 [30 ng]	pKH026 [30 ng]		RBDCRD	3xrL	F.L.T.	EF1a	pFos	30	8.3		0.0217011	0.00101571	0.724333	5182.67	0.0956	852		0.00249753	0.000615588	0.738	3179	0.0081	720.667		8.68903	2.17994
E64	E64_P2B3		pGS030 [1.67 ng]	pGS029 [1.67 ng]	pGS200 & pGS201 [each 30 ng]	pLN068 [2.77 ng]	pMZ219 [30 ng]	pKH026 [30 ng]		RBDCRD	3xrL	F.L.T.	EF1a	pFos	30	2.77		0.0449793	0.00196745	0.668333	4258.67	0.0802333	1592.33		0.000913492	0.000342617	0.725333	2858	0.0045	404.667		49.2389	18.5928
E64	E64_P2B4		pGS030 [1.67 ng]	pGS029 [1.67 ng]	pGS200 & pGS201 [each 30 ng]	pLN068 [0.92 ng]	pMZ219 [30 ng]	pKH026 [30 ng]		RBDCRD	3xrL	F.L.T.	EF1a	pFos	30	0.92		0.0449588	0.00130435	0.664667	3660	0.0549	2005.33		0.000331631	0.000199139	0.732333	3054.67	0.004	169.333		135.569	81.502
E64	E64_P2B5		pGS030 [1.67 ng]	pGS029 [1.67 ng]	pGS200 & pGS201 [each 30 ng]	pLN069 [5 ng]	pMZ219 [30 ng]	pKH026 [30 ng]		RBDCRD	3xrL	F.L.T.	EF1a	PY2_	30	5		0.0499639	0.00589404	0.671667	3295	0.0596333	1860.67		0.0010368	0.000461002	0.735333	2903	0.00486667	468.667		48.1907	22.1688
E64	E64_P2B6		pGS030 [1.67 ng]	pGS029 [1.67 ng]	pGS200 & pGS201 [each 30 ng]	pLN069 [1.67 ng]	pMZ219 [30 ng]	pKH026 [30 ng]		RBDCRD	3xrL	F.L.T.	EF1a	PY2_	30	1.67		0.0391448	0.00226028	0.712333	3876.33	0.0532333	2037.33		0.000228586	7.01e-05	0.755333	3079.33	0.00333333	159.667		171.247	53.4712
E64	E64_P2B7		pGS030 [1.67 ng]	pGS029 [1.67 ng]	pGS200 & pGS201 [each 30 ng]	pLN069 [0.56 ng]	pMZ219 [30 ng]	pKH026 [30 ng]		RBDCRD	3xrL	F.L.T.	EF1a	PY2_	30	0.56		0.027524	0.00359407	0.732333	4151.67	0.0399	2106		8.37e-05	2.25e-05	0.761667	3101.33	0.0028	71.2333		328.712	98.1942
E64	E64_P2B8		pGS030 [1.67 ng]	pGS029 [1.67 ng]	pGS200 & pGS201 [each 30 ng]	pLN073 [2.8 ng]	pMZ219 [30 ng]	pKH026 [30 ng]		RBDCRD	3xrL	F.L.T.	EF1a	SRE_	30	2.8		0.0253977	0.00173773	0.678667	3877.33	0.0798	840.667		0.00236838	0.000576217	0.757333	2989.67	0.00833333	646		10.7237	2.71022
E64	E64_P2B9		pGS030 [1.67 ng]	pGS029 [1.67 ng]	pGS200 & pGS201 [each 30 ng]	pLN073 [0.93 ng]	pMZ219 [30 ng]	pKH026 [30 ng]		RBDCRD	3xrL	F.L.T.	EF1a	SRE_	30	0.93		0.045731	0.00229494	0.761667	5054	0.104767	1704.33		0.00255325	0.000867003	0.645667	2619.33	0.0049	915.667		17.9109	6.14802
E64	E64_P2E10		pGS030 [1.67 ng]	pGS029 [1.67 ng]	pGS200 & pGS201 [each 15 ng]	pLN073 [0.31 ng]	pMZ219 [30 ng]	pKH026 [30 ng]		RBDCRD	3xrL	F.L.T.	EF1a	SRE_	15	0.31		0.0219875	0.00245831	0.759667	5319	0.0529667	1675.67		0.000645524	0.000291421	0.742667	3138.67	0.00286667	509.667		34.0614	15.8415
E64	E64_P2E2		pGS030 [1.67 ng]	pGS029 [1.67 ng]	pGS200 & pGS201 [each 15 ng]	pLN068 [8.3 ng]	pMZ219 [30 ng]	pKH026 [30 ng]		RBDCRD	3xrL	F.L.T.	EF1a	pFos	15	8.3		0.0104113	0.00120903	0.750333	5629.33	0.0684333	650.333		9.67e-05	4.01e-05	0.751333	3404.33	0.00233333	100.733		107.707	46.3984
E64	E64_P2E3		pGS030 [1.67 ng]	pGS029 [1.67 ng]	pGS200 & pGS201 [each 15 ng]	pLN068 [2.77 ng]	pMZ219 [30 ng]	pKH026 [30 ng]		RBDCRD	3xrL	F.L.T.	EF1a	pFos	15	2.77		0.0201761	0.00234439	0.771333	5697.67	0.0772	1142.33		0.000385175	0.000338579	0.738667	2815	0.00256667	311.667		52.3817	46.4454
E64	E64_P2E4		pGS030 [1.67 ng]	pGS029 [1.67 ng]	pGS200 & pGS201 [each 15 ng]	pLN068 [0.92 ng]	pMZ219 [30 ng]	pKH026 [30 ng]		RBDCRD	3xrL	F.L.T.	EF1a	pFos	15	0.92		0.0220438	0.000241717	0.781667	6281	0.0618667	1760		0.000674927	0.000661525	0.721	2907	0.0025	531.667		32.661	32.0145
E64	E64_P2E5		pGS030 [1.67 ng]	pGS029 [1.67 ng]	pGS200 & pGS201 [each 15 ng]	pLN069 [5 ng]	pMZ219 [30 ng]	pKH026 [30 ng]		RBDCRD	3xrL	F.L.T.	EF1a	PY2_	15	5		0.0243145	0.00236167	0.722333	4881	0.0586	1447.33		0.00102633	0.000134236	0.722	2815.67	0.00366667	597.333		23.6908	3.85956
E64	E64_P2E6		pGS030 [1.67 ng]	pGS029 [1.67 ng]	pGS200 & pGS201 [each 15 ng]	pLN069 [1.67 ng]	pMZ219 [30 ng]	pKH026 [30 ng]		RBDCRD	3xrL	F.L.T.	EF1a	PY2_	15	1.67		0.0259927	0.00371971	0.761333	5349.33	0.0555	1907.67		0.00166193	0.000666606	0.733667	2845	0.00573333	590.333		15.6401	6.66061
E64	E64_P2E7		pGS030 [1.67 ng]	pGS029 [1.67 ng]	pGS200 & pGS201 [each 15 ng]	pLN069 [0.56 ng]	pMZ219 [30 ng]	pKH026 [30 ng]		RBDCRD	3xrL	F.L.T.	EF1a	PY2_	15	0.56		0.0174557	0.00189345	0.787333	5277.67	0.0402667	1816.33		4.68e-05	2.08e-05	0.743	3105.67	0.00156667	64.4667		372.67	170.07
E64	E64_P2E8		pGS030 [1.67 ng]	pGS029 [1.67 ng]	pGS200 & pGS201 [each 15 ng]	pLN073 [2.8 ng]	pMZ219 [30 ng]	pKH026 [30 ng]		RBDCRD	3xrL	F.L.T.	EF1a	SRE_	15	2.8		0.00916553	0.000697672	0.718667	4362.67	0.0529333	551		0.00183769	0.000348666	0.746	2920	0.0075	533.667		4.98753	1.0196
E64	E64_P2E9		pGS030 [1.67 ng]	pGS029 [1.67 ng]	pGS200 & pGS201 [each 15 ng]	pLN073 [0.93 ng]	pMZ219 [30 ng]	pKH026 [30 ng]		RBDCRD	3xrL	F.L.T.	EF1a	SRE_	15	0.93		0.0206399	0.00221742	0.767333	5239	0.0686333	1209.67		0.00108908	0.000323758	0.761	3199	0.00406667	659		18.9517	5.99054
E64	E64_P3B10		pGS030 [1.67 ng]	pGS029 [1.67 ng]	pLN102 & pLN107 [each 1.5 ng]	pMZ248 [7.5 ng]	pMZ219 [30 ng]	pKH026 [30 ng]		K55	6xfL	VP48	pFos	EF1a	1	7.5		0.0220013	0.00146293	0.856333	9602	0.266	682		0.000162935	4.15e-05	0.847333	6309.67	0.00703333	122.433		135.031	35.5818
E64	E64_P3B2		pGS030 [1.67 ng]	pGS029 [1.67 ng]	pLN082 & pLN087 [each 13.3 ng]	pMZ248 [7.5 ng]	pMZ219 [30 ng]	pKH026 [30 ng]		RBDCRD	6xfL	VP48	pFos	EF1a	9	7.5		0.0098745	0.000266759	0.801333	5604.33	0.112667	393		0.00105627	0.000121314	0.846667	5438	0.0238333	205		9.34843	1.10298
E64	E64_P3B3		pGS030 [1.67 ng]	pGS029 [1.67 ng]	pLN082 & pLN087 [each 4.43 ng]	pMZ248 [7.5 ng]	pMZ219 [30 ng]	pKH026 [30 ng]		RBDCRD	6xfL	VP48	pFos	EF1a	3	7.5		0.0174106	0.00101052	0.851333	7395	0.182333	604		0.000435371	6.26e-05	0.873	5866	0.0119	187.667		39.9903	6.19787
E64	E64_P3B4		pGS030 [1.67 ng]	pGS029 [1.67 ng]	pLN082 & pLN087 [each 1.5 ng]	pMZ248 [7.5 ng]	pMZ219 [30 ng]	pKH026 [30 ng]		RBDCRD	6xfL	VP48	pFos	EF1a	1	7.5		0.0168228	0.00167909	0.876333	9135.33	0.197333	683.333		0.00012163	2.54e-05	0.867667	5651	0.0063	95.1		138.311	31.9626
E64	E64_P3B5		pGS030 [1.67 ng]	pGS029 [1.67 ng]	pLN092 & pLN097 [each 13.3 ng]	pMZ248 [7.5 ng]	pMZ219 [30 ng]	pKH026 [30 ng]		RA	6xfL	VP48	pFos	EF1a	9	7.5		0.00160195	0.000135825	0.843333	5890.33	0.0604333	131		8.14e-05	2.75e-05	0.853333	4659.33	0.00466667	70.6		19.6787	6.8511
E64	E64_P3B6		pGS030 [1.67 ng]	pGS029 [1.67 ng]	pLN092 & pLN097 [each 4.43 ng]	pMZ248 [7.5 ng]	pMZ219 [30 ng]	pKH026 [30 ng]		RA	6xfL	VP48	pFos	EF1a	3	7.5		0.003241	0.000514352	0.86	7964	0.111233	196.667		7.97e-05	2.54e-05	0.854	6067.67	0.00526667	75.9		40.6597	14.4546
E64	E64_P3B7		pGS030 [1.67 ng]	pGS029 [1.67 ng]	pLN092 & pLN097 [each 1.5 ng]	pMZ248 [7.5 ng]	pMZ219 [30 ng]	pKH026 [30 ng]		RA	6xfL	VP48	pFos	EF1a	1	7.5		0.0037794	0.000120642	0.890667	9513.33	0.128333	249.667		6.99e-05	2.08e-05	0.877333	7014	0.00576667	74.1667		54.0884	16.1557
E64	E64_P3B8		pGS030 [1.67 ng]	pGS029 [1.67 ng]	pLN102 & pLN107 [each 13.3 ng]	pMZ248 [7.5 ng]	pMZ219 [30 ng]	pKH026 [30 ng]		K55	6xfL	VP48	pFos	EF1a	9	7.5		0.0209159	0.000630326	0.823667	4752.33	0.18	455.667		0.00161132	0.000109559	0.815333	5288.67	0.0258	268.667		12.9806	0.965394
E64	E64_P3B9		pGS030 [1.67 ng]	pGS029 [1.67 ng]	pLN102 & pLN107 [each 4.43 ng]	pMZ248 [7.5 ng]	pMZ219 [30 ng]	pKH026 [30 ng]		K55	6xfL	VP48	pFos	EF1a	3	7.5		0.030371	0.0016932	0.849667	8039.67	0.289	717.667		0.000492752	0.000111967	0.855667	5653	0.012	196.667		61.6355	14.4207
E64	E64_P3E10		pGS030 [1.67 ng]	pGS029 [1.67 ng]	pLN102 & pLN107 [each 1.5 ng]	pMZ248 [2.5 ng]	pMZ219 [30 ng]	pKH026 [30 ng]		K55	6xfL	VP48	pFos	EF1a	1	2.5		0.0147858	0.00205514	0.906	12843.3	0.231667	741		0.000106754	2.89e-05	0.867667	6347.67	0.0035	170.333		138.504	42.1434
E64	E64_P3E2		pGS030 [1.67 ng]	pGS029 [1.67 ng]	pLN082 & pLN087 [each 13.3 ng]	pMZ248 [2.5 ng]	pMZ219 [30 ng]	pKH026 [30 ng]		RBDCRD	6xfL	VP48	pFos	EF1a	9	2.5		0.00632699	0.00063546	0.815	5359	0.0711	387.667		0.000940885	0.000172146	0.846667	5595	0.0190333	236		6.72451	1.40352
E64	E64_P3E3		pGS030 [1.67 ng]	pGS029 [1.67 ng]	pLN082 & pLN087 [each 4.43 ng]	pMZ248 [2.5 ng]	pMZ219 [30 ng]	pKH026 [30 ng]		RBDCRD	6xfL	VP48	pFos	EF1a	3	2.5		0.0147238	0.000352842	0.869333	7775.33	0.143667	691.667		0.000328999	4.33e-05	0.823333	5510.67	0.0085	180		44.7535	5.99127
E64	E64_P3E4		pGS030 [1.67 ng]	pGS029 [1.67 ng]	pLN082 & pLN087 [each 1.5 ng]	pMZ248 [2.5 ng]	pMZ219 [30 ng]	pKH026 [30 ng]		RBDCRD	6xfL	VP48	pFos	EF1a	1	2.5		0.0173293	0.00230541	0.875667	10202	0.173	884.333		0.000158611	4.48e-05	0.827667	5980	0.0046	170		109.257	34.1276
E64	E64_P3E5		pGS030 [1.67 ng]	pGS029 [1.67 ng]	pLN092 & pLN097 [each 13.3 ng]	pMZ248 [2.5 ng]	pMZ219 [30 ng]	pKH026 [30 ng]		RA	6xfL	VP48	pFos	EF1a	9	2.5		0.000513784	0.000146393	0.884333	7411.33	0.0277	119.667		4.01e-05	1.55e-05	0.875667	5339.33	0.00273333	66.8667		12.827	6.16823
E64	E64_P3E6		pGS030 [1.67 ng]	pGS029 [1.67 ng]	pLN092 & pLN097 [each 4.43 ng]	pMZ248 [2.5 ng]	pMZ219 [30 ng]	pKH026 [30 ng]		RA	6xfL	VP48	pFos	EF1a	3	2.5		0.00176169	0.000426469	0.892667	10040.7	0.0733667	208		3.71e-05	2.08e-05	0.867667	6064	0.00273333	66.1667		47.4809	28.9495
E64	E64_P3E7		pGS030 [1.67 ng]	pGS029 [1.67 ng]	pLN092 & pLN097 [each 1.5 ng]	pMZ248 [2.5 ng]	pMZ219 [30 ng]	pKH026 [30 ng]		RA	6xfL	VP48	pFos	EF1a	1	2.5		0.00322018	0.000461176	0.918	12525.3	0.105333	347.667		3.78e-05	1.1e-05	0.841333	6063.67	0.0027	68.3333		85.2299	27.7122
E64	E64_P3E8		pGS030 [1.67 ng]	pGS029 [1.67 ng]	pLN102 & pLN107 [each 13.3 ng]	pMZ248 [2.5 ng]	pMZ219 [30 ng]	pKH026 [30 ng]		K55	6xfL	VP48	pFos	EF1a	9	2.5		0.00632884	0.000652556	0.886333	7320.67	0.111667	365.667		0.00112821	0.000145588	0.824667	4841.33	0.0155667	288.333		5.60963	0.926584
E64	E64_P3E9		pGS030 [1.67 ng]	pGS029 [1.67 ng]	pLN102 & pLN107 [each 4.43 ng]	pMZ248 [2.5 ng]	pMZ219 [30 ng]	pKH026 [30 ng]		K55	6xfL	VP48	pFos	EF1a	3	2.5		0.0147121	0.00227227	0.836667	9359	0.178	635.333		0.000342539	5.56e-05	0.819333	5398.33	0.00633333	240.667		42.9502	9.61879
E64	E64_P4B10		pGS030 [1.67 ng]	pGS029 [1.67 ng]	pLN102 & pLN107 [each 1.5 ng]	pLN007 [7.5 ng]	pMZ219 [30 ng]	pKH026 [30 ng]		K55	6xfL	F.L.T.	pFos	EF1a	1	7.5		0.00741735	0.000568106	0.917	12168.7	0.125667	655.333		0.000268017	2.77e-05	0.891333	7191.33	0.0105667	162.667		27.6749	3.55912
E64	E64_P4B2		pGS030 [1.67 ng]	pGS029 [1.67 ng]	pLN082 & pLN087 [each 13.3 ng]	pLN007 [7.5 ng]	pMZ219 [30 ng]	pKH026 [30 ng]		RBDCRD	6xfL	F.L.T.	pFos	EF1a	9	7.5		0.00481038	0.000664872	0.863333	5930.67	0.0418	590.667		0.000902839	0.00016836	0.834	5521	0.0128333	326		5.32805	1.23673
E64	E64_P4B3		pGS030 [1.67 ng]	pGS029 [1.67 ng]	pLN082 & pLN087 [each 4.43 ng]	pLN007 [7.5 ng]	pMZ219 [30 ng]	pKH026 [30 ng]		RBDCRD	6xfL	F.L.T.	pFos	EF1a	3	7.5		0.0155466	0.000665481	0.882	8207	0.0970333	1162		0.000621179	8.53e-05	0.841	5436.67	0.0126	232		25.0276	3.59861
E64	E64_P4B4		pGS030 [1.67 ng]	pGS029 [1.67 ng]	pLN082 & pLN087 [each 1.5 ng]	pLN007 [7.5 ng]	pMZ219 [30 ng]	pKH026 [30 ng]		RBDCRD	6xfL	F.L.T.	pFos	EF1a	1	7.5		0.0276655	0.00190741	0.885333	9311.33	0.126	1809.67		0.000425846	0.000171871	0.849667	5695.33	0.0111333	189.667		64.9659	26.5999
E64	E64_P4B5		pGS030 [1.67 ng]	pGS029 [1.67 ng]	pLN092 & pLN097 [each 13.3 ng]	pLN007 [7.5 ng]	pMZ219 [30 ng]	pKH026 [30 ng]		RA	6xfL	F.L.T.	pFos	EF1a	9	7.5		0.000255025	8.12e-05	0.88	6826	0.0136	109.9		0.000139327	3.41e-05	0.878667	5678.67	0.00696667	99.1333		1.83041	0.73494
E64	E64_P4B6		pGS030 [1.67 ng]	pGS029 [1.67 ng]	pLN092 & pLN097 [each 4.43 ng]	pLN007 [7.5 ng]	pMZ219 [30 ng]	pKH026 [30 ng]		RA	6xfL	F.L.T.	pFos	EF1a	3	7.5		0.000337922	2.87e-05	0.909667	9614	0.0276333	107.233		0.000182666	1.65e-05	0.872333	5865.67	0.00933333	100.133		1.84994	0.229427
E64	E64_P4B7		pGS030 [1.67 ng]	pGS029 [1.67 ng]	pLN092 & pLN097 [each 1.5 ng]	pLN007 [7.5 ng]	pMZ219 [30 ng]	pKH026 [30 ng]		RA	6xfL	F.L.T.	pFos	EF1a	1	7.5		0.000510191	4.88e-05	0.926667	11906	0.0368333	153		0.000236678	2.48e-05	0.887333	6486.33	0.0108667	131		2.15563	0.305944
E64	E64_P4B8		pGS030 [1.67 ng]	pGS029 [1.67 ng]	pLN102 & pLN107 [each 13.3 ng]	pLN007 [7.5 ng]	pMZ219 [30 ng]	pKH026 [30 ng]		K55	6xfL	F.L.T.	pFos	EF1a	9	7.5		0.00114957	6.01e-05	0.87	5945	0.0284667	211		0.000426869	8.5e-05	0.858667	5086.67	0.00826667	231		2.69303	0.554561
E64	E64_P4B9		pGS030 [1.67 ng]	pGS029 [1.67 ng]	pLN102 & pLN107 [each 4.43 ng]	pLN007 [7.5 ng]	pMZ219 [30 ng]	pKH026 [30 ng]		K55	6xfL	F.L.T.	pFos	EF1a	3	7.5		0.00384043	0.000819663	0.911	9647.33	0.0922	365		0.000278721	2.56e-05	0.872	6137.33	0.009	165.333		13.7787	3.20152
E64	E64_P4E10		pGS030 [1.67 ng]	pGS029 [1.67 ng]	pLN102 & pLN107 [each 1.5 ng]	pLN007 [2.5 ng]	pMZ219 [30 ng]	pKH026 [30 ng]		K55	6xfL	F.L.T.	pFos	EF1a	1	2.5		0.00125916	0.000136403	0.894333	10764	0.0392667	306.333		6.89e-05	4.07e-05	0.866333	6930	0.00323333	121.667		18.2765	10.9834
E64	E64_P4E2		pGS030 [1.67 ng]	pGS029 [1.67 ng]	pLN082 & pLN087 [each 13.3 ng]	pLN007 [2.5 ng]	pMZ219 [30 ng]	pKH026 [30 ng]		RBDCRD	6xfL	F.L.T.	pFos	EF1a	9	2.5		0.000774112	4.67e-05	0.839333	5887.33	0.0116	330.667		0.000132474	2.19e-05	0.845	5794.33	0.00416667	158.667		5.84348	1.02736
E64	E64_P4E3		pGS030 [1.67 ng]	pGS029 [1.67 ng]	pLN082 & pLN087 [each 4.43 ng]	pLN007 [2.5 ng]	pMZ219 [30 ng]	pKH026 [30 ng]		RBDCRD	6xfL	F.L.T.	pFos	EF1a	3	2.5		0.0037839	6.75e-05	0.844333	7037.33	0.0287667	783.333		0.000179921	8.24e-05	0.879667	6443.67	0.00616667	175.667		21.0309	9.64476
E64	E64_P4E4		pGS030 [1.67 ng]	pGS029 [1.67 ng]	pLN082 & pLN087 [each 1.5 ng]	pLN007 [2.5 ng]	pMZ219 [30 ng]	pKH026 [30 ng]		RBDCRD	6xfL	F.L.T.	pFos	EF1a	1	2.5		0.00671866	0.000728364	0.849667	8479	0.0451	1063		9.37e-05	3.32e-05	0.870333	6452	0.00456667	122.233		71.7034	26.535
E64	E64_P4E5		pGS030 [1.67 ng]	pGS029 [1.67 ng]	pLN092 & pLN097 [each 13.3 ng]	pLN007 [2.5 ng]	pMZ219 [30 ng]	pKH026 [30 ng]		RA	6xfL	F.L.T.	pFos	EF1a	9	2.5		0.000103131	2.14e-05	0.844667	6435.67	0.00633333	89.4333		5.69e-05	1.55e-05	0.802333	4370.33	0.00303333	67.3667		1.81385	0.622515
E64	E64_P4E6		pGS030 [1.67 ng]	pGS029 [1.67 ng]	pLN092 & pLN097 [each 4.43 ng]	pLN007 [2.5 ng]	pMZ219 [30 ng]	pKH026 [30 ng]		RA	6xfL	F.L.T.	pFos	EF1a	3	2.5		0.000108238	3.23e-05	0.846333	7457.33	0.00913333	73.1667		6.12e-05	1.89e-05	0.803667	5412.33	0.0032	86.4333		1.76882	0.761039
E64	E64_P4E7		pGS030 [1.67 ng]	pGS029 [1.67 ng]	pLN092 & pLN097 [each 1.5 ng]	pLN007 [2.5 ng]	pMZ219 [30 ng]	pKH026 [30 ng]		RA	6xfL	F.L.T.	pFos	EF1a	1	2.5		0.000170074	8.7e-06	0.874333	9589	0.0149333	100.3		8.35e-05	4.23e-05	0.883667	6660	0.0048	100.233		2.03603	1.0368
E64	E64_P4E8		pGS030 [1.67 ng]	pGS029 [1.67 ng]	pLN102 & pLN107 [each 13.3 ng]	pLN007 [2.5 ng]	pMZ219 [30 ng]	pKH026 [30 ng]		K55	6xfL	F.L.T.	pFos	EF1a	9	2.5		0.000177476	2.57e-05	0.871333	6870.67	0.00773333	141.667		7.28e-05	1.22e-05	0.865333	5608.33	0.0033	110.067		2.43745	0.540033
E64	E64_P4E9		pGS030 [1.67 ng]	pGS029 [1.67 ng]	pLN102 & pLN107 [each 4.43 ng]	pLN007 [2.5 ng]	pMZ219 [30 ng]	pKH026 [30 ng]		K55	6xfL	F.L.T.	pFos	EF1a	3	2.5		0.00052416	8.64e-05	0.840667	7812.67	0.0205	165		0.000101981	1.35e-05	0.870333	6686.33	0.00336667	177.333		5.13977	1.08648
E64	E64_P5B10		pGS030 [1.67 ng]	pGS029 [1.67 ng]	pLN103 & pLN108 [each 1.5 ng]	pMZ248 [7.5 ng]	pMZ219 [30 ng]	pKH026 [30 ng]		K55	6xfL	VP48	PY2_	EF1a	1	7.5		0.0123027	0.000134008	0.924667	14000.3	0.276	577		0.000110181	1.77e-05	0.818333	8842.67	0.00796667	99.6333		111.659	17.9826
E64	E64_P5B2		pGS030 [1.67 ng]	pGS029 [1.67 ng]	pLN083 & pLN088 [each 13.3 ng]	pMZ248 [7.5 ng]	pMZ219 [30 ng]	pKH026 [30 ng]		RBDCRD	6xfL	VP48	PY2_	EF1a	9	7.5		0.0183201	0.000628113	0.836333	6700.33	0.192	536.333		0.00182598	0.000266337	0.780667	6748.33	0.0334333	288.333		10.033	1.5033
E64	E64_P5B3		pGS030 [1.67 ng]	pGS029 [1.67 ng]	pLN083 & pLN088 [each 4.43 ng]	pMZ248 [7.5 ng]	pMZ219 [30 ng]	pKH026 [30 ng]		RBDCRD	6xfL	VP48	PY2_	EF1a	3	7.5		0.0219167	0.00348958	0.868	9170.67	0.245667	703.333		0.000467668	1.77e-05	0.846	8147.67	0.0187	173.333		46.8638	7.66842
E64	E64_P5B4		pGS030 [1.67 ng]	pGS029 [1.67 ng]	pLN083 & pLN088 [each 1.5 ng]	pMZ248 [7.5 ng]	pMZ219 [30 ng]	pKH026 [30 ng]		RBDCRD	6xfL	VP48	PY2_	EF1a	1	7.5		0.0152469	0.0028627	0.885	10193.7	0.201333	678.333		0.00012304	2.91e-05	0.782667	9718.67	0.0086	110.433		123.918	37.3895
E64	E64_P5B5		pGS030 [1.67 ng]	pGS029 [1.67 ng]	pLN093 & pLN098 [each 13.3 ng]	pMZ248 [7.5 ng]	pMZ219 [30 ng]	pKH026 [30 ng]		RA	6xfL	VP48	PY2_	EF1a	9	7.5		0.0109131	0.00052416	0.859	8214.33	0.246667	311.333		0.000599307	0.000119926	0.789667	6844.33	0.0224667	142.667		18.2095	3.74734
E64	E64_P5B6		pGS030 [1.67 ng]	pGS029 [1.67 ng]	pLN093 & pLN098 [each 4.43 ng]	pMZ248 [7.5 ng]	pMZ219 [30 ng]	pKH026 [30 ng]		RA	6xfL	VP48	PY2_	EF1a	3	7.5		0.0119293	0.00195642	0.886333	10485.7	0.269667	407.667		0.000319738	0.000104813	0.818	9035.67	0.0163333	137		37.3096	13.6757
E64	E64_P5B7		pGS030 [1.67 ng]	pGS029 [1.67 ng]	pLN093 & pLN098 [each 1.5 ng]	pMZ248 [7.5 ng]	pMZ219 [30 ng]	pKH026 [30 ng]		RA	6xfL	VP48	PY2_	EF1a	1	7.5		0.0104454	0.000839819	0.928333	12424	0.261667	459.667		0.000109036	1.67e-05	0.795333	8985	0.00926667	85.4667		95.7977	16.5937
E64	E64_P5B8		pGS030 [1.67 ng]	pGS029 [1.67 ng]	pLN103 & pLN108 [each 13.3 ng]	pMZ248 [7.5 ng]	pMZ219 [30 ng]	pKH026 [30 ng]		K55	6xfL	VP48	PY2_	EF1a	9	7.5		0.0186808	0.000797007	0.891	7553.33	0.261333	480.333		0.00158764	0.000251914	0.821667	7129	0.0373667	248.667		11.7664	1.93331
E64	E64_P5B9		pGS030 [1.67 ng]	pGS029 [1.67 ng]	pLN103 & pLN108 [each 4.43 ng]	pMZ248 [7.5 ng]	pMZ219 [30 ng]	pKH026 [30 ng]		K55	6xfL	VP48	PY2_	EF1a	3	7.5		0.0196691	0.00171805	0.920667	11642.3	0.328667	640.333		0.000331326	4.23e-05	0.779	8833.67	0.0126	182.333		59.3646	9.19029
E64	E64_P5E10		pGS030 [1.67 ng]	pGS029 [1.67 ng]	pLN103 & pLN108 [each 1.5 ng]	pMZ248 [2.5 ng]	pMZ219 [30 ng]	pKH026 [30 ng]		K55	6xfL	VP48	PY2_	EF1a	1	2.5		0.0126183	0.000924837	0.884667	12919	0.204667	705.667		6.19e-05	8.23e-06	0.810667	9052.67	0.00346667	134.667		203.838	30.9501
E64	E64_P5E2		pGS030 [1.67 ng]	pGS029 [1.67 ng]	pLN083 & pLN088 [each 13.3 ng]	pMZ248 [2.5 ng]	pMZ219 [30 ng]	pKH026 [30 ng]		RBDCRD	6xfL	VP48	PY2_	EF1a	9	2.5		0.0136289	0.00110271	0.861	6960	0.144	565.333		0.00186506	6.39e-05	0.826667	6812	0.0291333	361		7.30749	0.642055
E64	E64_P5E3		pGS030 [1.67 ng]	pGS029 [1.67 ng]	pLN083 & pLN088 [each 4.43 ng]	pMZ248 [2.5 ng]	pMZ219 [30 ng]	pKH026 [30 ng]		RBDCRD	6xfL	VP48	PY2_	EF1a	3	2.5		0.0210097	0.00226629	0.858667	9353.33	0.206333	809		0.000480499	0.000103251	0.79	8085.67	0.0121	250.667		43.7247	10.5131
E64	E64_P5E4		pGS030 [1.67 ng]	pGS029 [1.67 ng]	pLN083 & pLN088 [each 1.5 ng]	pMZ248 [2.5 ng]	pMZ219 [30 ng]	pKH026 [30 ng]		RBDCRD	6xfL	VP48	PY2_	EF1a	1	2.5		0.0193716	0.00278719	0.870333	11029.7	0.200667	907.667		8.16e-05	2.36e-05	0.804333	8503.67	0.0046	127.1		237.389	76.7111
E64	E64_P5E5		pGS030 [1.67 ng]	pGS029 [1.67 ng]	pLN093 & pLN098 [each 13.3 ng]	pMZ248 [2.5 ng]	pMZ219 [30 ng]	pKH026 [30 ng]		RA	6xfL	VP48	PY2_	EF1a	9	2.5		0.00607587	0.00130291	0.886	8879.33	0.158667	297.667		0.000401627	8.43e-05	0.809	6604.33	0.0112333	192		15.1282	4.54046
E64	E64_P5E6		pGS030 [1.67 ng]	pGS029 [1.67 ng]	pLN093 & pLN098 [each 4.43 ng]	pMZ248 [2.5 ng]	pMZ219 [30 ng]	pKH026 [30 ng]		RA	6xfL	VP48	PY2_	EF1a	3	2.5		0.0116381	0.00168137	0.884	10415	0.205667	515		0.000211434	7.55e-05	0.758667	8680.33	0.00703333	197.333		55.0436	21.2068
E64	E64_P5E7		pGS030 [1.67 ng]	pGS029 [1.67 ng]	pLN093 & pLN098 [each 1.5 ng]	pMZ248 [2.5 ng]	pMZ219 [30 ng]	pKH026 [30 ng]		RA	6xfL	VP48	PY2_	EF1a	1	2.5		0.0121015	0.00148477	0.905	12377	0.211	644.333		7.42e-05	1.92e-05	0.820667	9466	0.0053	108.333		163.182	46.7413
E64	E64_P5E8		pGS030 [1.67 ng]	pGS029 [1.67 ng]	pLN103 & pLN108 [each 13.3 ng]	pMZ248 [2.5 ng]	pMZ219 [30 ng]	pKH026 [30 ng]		K55	6xfL	VP48	PY2_	EF1a	9	2.5		0.00812629	0.00117012	0.886667	7848.67	0.139667	403.333		0.00109849	3.88e-05	0.829667	7213.33	0.0243667	271		7.39769	1.09684
E64	E64_P5E9		pGS030 [1.67 ng]	pGS029 [1.67 ng]	pLN103 & pLN108 [each 4.43 ng]	pMZ248 [2.5 ng]	pMZ219 [30 ng]	pKH026 [30 ng]		K55	6xfL	VP48	PY2_	EF1a	3	2.5		0.0140418	0.0021897	0.868667	10146.3	0.195667	633		0.000374481	7.56e-05	0.824667	8614	0.0106	264.667		37.4967	9.56584
E64	E64_P6B10		pGS030 [1.67 ng]	pGS029 [1.67 ng]	pLN103 & pLN108 [each 1.5 ng]	pLN007 [7.5 ng]	pMZ219 [30 ng]	pKH026 [30 ng]		K55	6xfL	F.L.T.	PY2_	EF1a	1	7.5		0.0102372	0.000570073	0.883667	12673.7	0.128333	894		0.000290464	4.14e-05	0.84	8014.33	0.0114	172		35.2444	5.3962
E64	E64_P6B2		pGS030 [1.67 ng]	pGS029 [1.67 ng]	pLN083 & pLN088 [each 13.3 ng]	pLN007 [7.5 ng]	pMZ219 [30 ng]	pKH026 [30 ng]		RBDCRD	6xfL	F.L.T.	PY2_	EF1a	9	7.5		0.0195551	0.00211036	0.871333	7353.33	0.1093	1146.67		0.00163785	0.000339181	0.814333	7453	0.0228	438		11.9395	2.78814
E64	E64_P6B3		pGS030 [1.67 ng]	pGS029 [1.67 ng]	pLN083 & pLN088 [each 4.43 ng]	pLN007 [7.5 ng]	pMZ219 [30 ng]	pKH026 [30 ng]		RBDCRD	6xfL	F.L.T.	PY2_	EF1a	3	7.5		0.0385091	0.00227311	0.917333	10443.3	0.204	1805.33		0.000689129	0.000158865	0.864	8330	0.0149333	330.667		55.8808	13.2978
E64	E64_P6B4		pGS030 [1.67 ng]	pGS029 [1.67 ng]	pLN083 & pLN088 [each 1.5 ng]	pLN007 [7.5 ng]	pMZ219 [30 ng]	pKH026 [30 ng]		RBDCRD	6xfL	F.L.T.	PY2_	EF1a	1	7.5		0.0450694	0.00135095	0.928667	12335.3	0.223	2315.67		0.000324091	9.09e-05	0.884667	8673	0.0125	199.333		139.064	39.2206
E64	E64_P6B5		pGS030 [1.67 ng]	pGS029 [1.67 ng]	pLN093 & pLN098 [each 13.3 ng]	pLN007 [7.5 ng]	pMZ219 [30 ng]	pKH026 [30 ng]		RA	6xfL	F.L.T.	PY2_	EF1a	9	7.5		0.000759033	0.000216616	0.889	7252	0.0319	154.333		0.000204878	2.41e-05	0.837	6299	0.0069	157		3.70481	1.14338
E64	E64_P6B6		pGS030 [1.67 ng]	pGS029 [1.67 ng]	pLN093 & pLN098 [each 4.43 ng]	pLN007 [7.5 ng]	pMZ219 [30 ng]	pKH026 [30 ng]		RA	6xfL	F.L.T.	PY2_	EF1a	3	7.5		0.0020951	0.000131386	0.895667	9292	0.0737	237.667		0.000427381	4.62e-05	0.869	7924.67	0.0134	224.667		4.90217	0.612614
E64	E64_P6B7		pGS030 [1.67 ng]	pGS029 [1.67 ng]	pLN093 & pLN098 [each 1.5 ng]	pLN007 [7.5 ng]	pMZ219 [30 ng]	pKH026 [30 ng]		RA	6xfL	F.L.T.	PY2_	EF1a	1	7.5		0.00547099	0.000518972	0.88	10584.3	0.0983667	521		0.000341361	8.65e-05	0.896333	8917	0.0153333	176.333		16.027	4.33517
E64	E64_P6B8		pGS030 [1.67 ng]	pGS029 [1.67 ng]	pLN103 & pLN108 [each 13.3 ng]	pLN007 [7.5 ng]	pMZ219 [30 ng]	pKH026 [30 ng]		K55	6xfL	F.L.T.	PY2_	EF1a	9	7.5		0.00214792	0.00025997	0.871333	6912.33	0.0510333	254.333		0.000492171	1.13e-05	0.859333	7072.33	0.0136333	220		4.36417	0.537663
E64	E64_P6B9		pGS030 [1.67 ng]	pGS029 [1.67 ng]	pLN103 & pLN108 [each 4.43 ng]	pLN007 [7.5 ng]	pMZ219 [30 ng]	pKH026 [30 ng]		K55	6xfL	F.L.T.	PY2_	EF1a	3	7.5		0.00692153	0.000190791	0.881333	10323	0.121	519.333		0.000346238	0.00010848	0.860333	7310	0.0116	187.333		19.9907	6.28747
E64	E64_P6E10		pGS030 [1.67 ng]	pGS029 [1.67 ng]	pLN103 & pLN108 [each 1.5 ng]	pLN007 [2.5 ng]	pMZ219 [30 ng]	pKH026 [30 ng]		K55	6xfL	F.L.T.	PY2_	EF1a	1	2.5		0.00197715	3.97e-05	0.907	12600	0.0622667	363.667		7.52e-05	2.42e-05	0.843	9531.67	0.0049	129.867		26.2783	8.47613
E64	E64_P6E2		pGS030 [1.67 ng]	pGS029 [1.67 ng]	pLN083 & pLN088 [each 13.3 ng]	pLN007 [2.5 ng]	pMZ219 [30 ng]	pKH026 [30 ng]		RBDCRD	6xfL	F.L.T.	PY2_	EF1a	9	2.5		0.00359957	0.000221056	0.877667	7110.33	0.0336667	669.667		0.000452886	0.000109211	0.809667	7848	0.00833333	344.333		7.94807	1.97781
E64	E64_P6E3		pGS030 [1.67 ng]	pGS029 [1.67 ng]	pLN083 & pLN088 [each 4.43 ng]	pLN007 [2.5 ng]	pMZ219 [30 ng]	pKH026 [30 ng]		RBDCRD	6xfL	F.L.T.	PY2_	EF1a	3	2.5		0.0105463	0.000775309	0.895333	9386.67	0.0822667	1074.33		0.000204103	4.59e-05	0.851667	8880.67	0.00693333	220.667		51.6713	12.2143
E64	E64_P6E4		pGS030 [1.67 ng]	pGS029 [1.67 ng]	pLN083 & pLN088 [each 1.5 ng]	pLN007 [2.5 ng]	pMZ219 [30 ng]	pKH026 [30 ng]		RBDCRD	6xfL	F.L.T.	PY2_	EF1a	1	2.5		0.0144194	0.00062805	0.905333	11333.3	0.109667	1348.33		0.000114813	4.02e-05	0.863333	8533.67	0.00463333	186.667		125.59	44.3004
E64	E64_P6E5		pGS030 [1.67 ng]	pGS029 [1.67 ng]	pLN093 & pLN098 [each 13.3 ng]	pLN007 [2.5 ng]	pMZ219 [30 ng]	pKH026 [30 ng]		RA	6xfL	F.L.T.	PY2_	EF1a	9	2.5		0.000267667	0.000102955	0.876667	7883	0.0198333	92.0333		4.85e-05	1.62e-05	0.875	7329	0.003	103.233		5.52314	2.81527
E64	E64_P6E6		pGS030 [1.67 ng]	pGS029 [1.67 ng]	pLN093 & pLN098 [each 4.43 ng]	pLN007 [2.5 ng]	pMZ219 [30 ng]	pKH026 [30 ng]		RA	6xfL	F.L.T.	PY2_	EF1a	3	2.5		0.000391672	0.000113455	0.904	10555.7	0.0310333	118		7.78e-05	3.24e-05	0.879667	8920.67	0.0043	142.667		5.03686	2.5558
E64	E64_P6E7		pGS030 [1.67 ng]	pGS029 [1.67 ng]	pLN093 & pLN098 [each 1.5 ng]	pLN007 [2.5 ng]	pMZ219 [30 ng]	pKH026 [30 ng]		RA	6xfL	F.L.T.	PY2_	EF1a	1	2.5		0.00089028	9.25e-05	0.901	11649.7	0.0412	227.667		7.19e-05	2.68e-05	0.888333	9392.33	0.006	101.867		12.3828	4.78984
E64	E64_P6E8		pGS030 [1.67 ng]	pGS029 [1.67 ng]	pLN103 & pLN108 [each 13.3 ng]	pLN007 [2.5 ng]	pMZ219 [30 ng]	pKH026 [30 ng]		K55	6xfL	F.L.T.	PY2_	EF1a	9	2.5		0.000330376	3.97e-05	0.883667	8067.33	0.0174	135		8.38e-05	2.89e-05	0.877667	7626.33	0.004	138.667		3.9436	1.44265
E64	E64_P6E9		pGS030 [1.67 ng]	pGS029 [1.67 ng]	pLN103 & pLN108 [each 4.43 ng]	pLN007 [2.5 ng]	pMZ219 [30 ng]	pKH026 [30 ng]		K55	6xfL	F.L.T.	PY2_	EF1a	3	2.5		0.000949009	0.000157453	0.900667	10875	0.0474	195.333		9.78e-05	2.79e-05	0.868	9628	0.00453333	192.667		9.70027	3.19759
E64	E64_P7B10		pGS030 [1.67 ng]	pGS029 [1.67 ng]	pLN105 & pLN110 [each 1.5 ng]	pMZ248 [7.5 ng]	pMZ219 [30 ng]	pKH026 [30 ng]		K55	6xfL	VP48	SRE_	EF1a	1	7.5		0.0241196	0.00102352	0.916333	14330.7	0.374333	844.333		0.000295367	3.1e-05	0.879667	8865	0.0157333	147		81.6599	9.24871
E64	E64_P7B2		pGS030 [1.67 ng]	pGS029 [1.67 ng]	pLN085 & pLN090 [each 13.3 ng]	pMZ248 [7.5 ng]	pMZ219 [30 ng]	pKH026 [30 ng]		RBDCRD	6xfL	VP48	SRE_	EF1a	9	7.5		0.0163861	0.000829942	0.874667	6420.67	0.202333	454		0.00619326	0.000293655	0.858333	6819	0.111167	325.667		2.64579	0.183564
E64	E64_P7B3		pGS030 [1.67 ng]	pGS029 [1.67 ng]	pLN085 & pLN090 [each 4.43 ng]	pMZ248 [7.5 ng]	pMZ219 [30 ng]	pKH026 [30 ng]		RBDCRD	6xfL	VP48	SRE_	EF1a	3	7.5		0.0267474	0.00254131	0.862	8389.33	0.283333	677.667		0.00266397	0.00011987	0.888333	7818.67	0.0673	275		10.0404	1.05553
E64	E64_P7B4		pGS030 [1.67 ng]	pGS029 [1.67 ng]	pLN085 & pLN090 [each 1.5 ng]	pMZ248 [7.5 ng]	pMZ219 [30 ng]	pKH026 [30 ng]		RBDCRD	6xfL	VP48	SRE_	EF1a	1	7.5		0.0347646	0.00183275	0.925333	11206.7	0.364333	988.333		0.00120786	0.000142138	0.906333	8726.67	0.0390667	245		28.7819	3.71132
E64	E64_P7B5		pGS030 [1.67 ng]	pGS029 [1.67 ng]	pLN095 & pLN100 [each 13.3 ng]	pMZ248 [7.5 ng]	pMZ219 [30 ng]	pKH026 [30 ng]		RA	6xfL	VP48	SRE_	EF1a	9	7.5		0.00863531	0.000782403	0.915667	8615.33	0.257	264		0.00119395	5.13e-05	0.891	7105	0.0460333	164.333		7.23253	0.725241
E64	E64_P7B6		pGS030 [1.67 ng]	pGS029 [1.67 ng]	pLN095 & pLN100 [each 4.43 ng]	pMZ248 [7.5 ng]	pMZ219 [30 ng]	pKH026 [30 ng]		RA	6xfL	VP48	SRE_	EF1a	3	7.5		0.0126643	0.0046041	0.928333	14875.3	0.376	426		0.000602049	7.7e-05	0.891667	8751.67	0.0311	150.667		21.0353	8.1066
E64	E64_P7B7		pGS030 [1.67 ng]	pGS029 [1.67 ng]	pLN095 & pLN100 [each 1.5 ng]	pMZ248 [7.5 ng]	pMZ219 [30 ng]	pKH026 [30 ng]		RA	6xfL	VP48	SRE_	EF1a	1	7.5		0.0140716	0.00183393	0.932667	14739.7	0.358667	538		0.000336773	6.91e-05	0.891333	8018	0.0197333	121.333		41.7837	10.1542
E64	E64_P7B8		pGS030 [1.67 ng]	pGS029 [1.67 ng]	pLN105 & pLN110 [each 13.3 ng]	pMZ248 [7.5 ng]	pMZ219 [30 ng]	pKH026 [30 ng]		K55	6xfL	VP48	SRE_	EF1a	9	7.5		0.0217307	0.00201969	0.894667	8298.67	0.298	540		0.00374767	0.000335786	0.870667	8315.33	0.0768333	353.667		5.79846	0.748563
E64	E64_P7B9		pGS030 [1.67 ng]	pGS029 [1.67 ng]	pLN105 & pLN110 [each 4.43 ng]	pMZ248 [7.5 ng]	pMZ219 [30 ng]	pKH026 [30 ng]		K55	6xfL	VP48	SRE_	EF1a	3	7.5		0.0291086	0.00157169	0.901667	11812.7	0.39	793.333		0.000825769	1.63e-05	0.883667	7949.33	0.0259333	224.333		35.2504	2.0272
E64	E64_P7E10		pGS030 [1.67 ng]	pGS029 [1.67 ng]	pLN105 & pLN110 [each 1.5 ng]	pMZ248 [2.5 ng]	pMZ219 [30 ng]	pKH026 [30 ng]		K55	6xfL	VP48	SRE_	EF1a	1	2.5		0.0183277	0.00195254	0.914	14074.3	0.271	865.333		0.000172336	1.34e-05	0.894	9238	0.00743333	197.667		106.349	14.0361
E64	E64_P7E2		pGS030 [1.67 ng]	pGS029 [1.67 ng]	pLN085 & pLN090 [each 13.3 ng]	pMZ248 [2.5 ng]	pMZ219 [30 ng]	pKH026 [30 ng]		RBDCRD	6xfL	VP48	SRE_	EF1a	9	2.5		0.00891912	0.000746337	0.859667	7205	0.127	435.333		0.00433547	0.000191249	0.844	7184.67	0.0680333	387		2.05724	0.194603
E64	E64_P7E3		pGS030 [1.67 ng]	pGS029 [1.67 ng]	pLN085 & pLN090 [each 4.43 ng]	pMZ248 [2.5 ng]	pMZ219 [30 ng]	pKH026 [30 ng]		RBDCRD	6xfL	VP48	SRE_	EF1a	3	2.5		0.0153719	0.00149012	0.878333	7909	0.169667	628.333		0.00269087	0.000351489	0.851	7472.67	0.0474667	357.667		5.71262	0.929231
E64	E64_P7E4		pGS030 [1.67 ng]	pGS029 [1.67 ng]	pLN085 & pLN090 [each 1.5 ng]	pMZ248 [2.5 ng]	pMZ219 [30 ng]	pKH026 [30 ng]		RBDCRD	6xfL	VP48	SRE_	EF1a	1	2.5		0.0241757	0.0025788	0.896667	10675	0.248667	928.667		0.0010883	2.83e-05	0.882	9081	0.0274	316.333		22.2141	2.43899
E64	E64_P7E5		pGS030 [1.67 ng]	pGS029 [1.67 ng]	pLN095 & pLN100 [each 13.3 ng]	pMZ248 [2.5 ng]	pMZ219 [30 ng]	pKH026 [30 ng]		RA	6xfL	VP48	SRE_	EF1a	9	2.5		0.00360355	0.000430048	0.898333	8893.33	0.12	238.333		0.00107853	0.000191512	0.877667	8877	0.0356	235.667		3.34117	0.714825
E64	E64_P7E6		pGS030 [1.67 ng]	pGS029 [1.67 ng]	pLN095 & pLN100 [each 4.43 ng]	pMZ248 [2.5 ng]	pMZ219 [30 ng]	pKH026 [30 ng]		RA	6xfL	VP48	SRE_	EF1a	3	2.5		0.010174	0.000651843	0.920333	12689.7	0.241333	491		0.000381173	4.37e-05	0.900667	8942.67	0.0161333	191		26.6912	3.5084
E64	E64_P7E7		pGS030 [1.67 ng]	pGS029 [1.67 ng]	pLN095 & pLN100 [each 1.5 ng]	pMZ248 [2.5 ng]	pMZ219 [30 ng]	pKH026 [30 ng]		RA	6xfL	VP48	SRE_	EF1a	1	2.5		0.0137912	0.000610848	0.915667	14510.7	0.27	678.667		0.000171155	1.75e-06	0.882333	9347.33	0.0104	137		80.5772	3.66331
E64	E64_P7E8		pGS030 [1.67 ng]	pGS029 [1.67 ng]	pLN105 & pLN110 [each 13.3 ng]	pMZ248 [2.5 ng]	pMZ219 [30 ng]	pKH026 [30 ng]		K55	6xfL	VP48	SRE_	EF1a	9	2.5		0.00665481	0.000703745	0.869333	7500	0.116	373		0.00175625	0.000178368	0.897333	7708.67	0.0333667	362.667		3.78921	0.55558
E64	E64_P7E9		pGS030 [1.67 ng]	pGS029 [1.67 ng]	pLN105 & pLN110 [each 4.43 ng]	pMZ248 [2.5 ng]	pMZ219 [30 ng]	pKH026 [30 ng]		K55	6xfL	VP48	SRE_	EF1a	3	2.5		0.014109	0.00111122	0.885333	9925	0.199	623		0.000552166	6.08e-05	0.911	9195.33	0.0161	286		25.5522	3.45872
E64	E64_P8B10		pGS030 [1.67 ng]	pGS029 [1.67 ng]	pLN105 & pLN110 [each 1.5 ng]	pLN007 [7.5 ng]	pMZ219 [30 ng]	pKH026 [30 ng]		K55	6xfL	F.L.T.	SRE_	EF1a	1	7.5		0.00956156	0.00204419	0.880333	14866	0.173667	698.667		0.000488151	9.55e-05	0.868333	8081.67	0.015	229.667		19.5873	5.67581
E64	E64_P8B2		pGS030 [1.67 ng]	pGS029 [1.67 ng]	pLN085 & pLN090 [each 13.3 ng]	pLN007 [7.5 ng]	pMZ219 [30 ng]	pKH026 [30 ng]		RBDCRD	6xfL	F.L.T.	SRE_	EF1a	9	7.5		0.00730741	0.000741295	0.846	6294.33	0.0714	544.667		0.00300411	0.000457705	0.836333	7284.67	0.0370333	492.667		2.43247	0.445244
E64	E64_P8B3		pGS030 [1.67 ng]	pGS029 [1.67 ng]	pLN085 & pLN090 [each 4.43 ng]	pLN007 [7.5 ng]	pMZ219 [30 ng]	pKH026 [30 ng]		RBDCRD	6xfL	F.L.T.	SRE_	EF1a	3	7.5		0.0149974	0.0010253	0.882	8636	0.140667	813.667		0.0022335	0.000235198	0.869	7528.33	0.0327	447		6.71475	0.843038
E64	E64_P8B4		pGS030 [1.67 ng]	pGS029 [1.67 ng]	pLN085 & pLN090 [each 1.5 ng]	pLN007 [7.5 ng]	pMZ219 [30 ng]	pKH026 [30 ng]		RBDCRD	6xfL	F.L.T.	SRE_	EF1a	1	7.5		0.0280103	0.00165336	0.896667	10095	0.198667	1273.67		0.00161187	0.000223168	0.862333	7908.33	0.0270333	404		17.3776	2.61551
E64	E64_P8B5		pGS030 [1.67 ng]	pGS029 [1.67 ng]	pLN095 & pLN100 [each 13.3 ng]	pLN007 [7.5 ng]	pMZ219 [30 ng]	pKH026 [30 ng]		RA	6xfL	F.L.T.	SRE_	EF1a	9	7.5		0.000402422	0.000137479	0.892333	7430.67	0.0283333	91.2333		0.000300186	8.61e-05	0.837667	6510	0.0101333	161.667		1.34058	0.597922
E64	E64_P8B6		pGS030 [1.67 ng]	pGS029 [1.67 ng]	pLN095 & pLN100 [each 4.43 ng]	pLN007 [7.5 ng]	pMZ219 [30 ng]	pKH026 [30 ng]		RA	6xfL	F.L.T.	SRE_	EF1a	3	7.5		0.000759468	0.000210751	0.860333	10210	0.0529333	126.333		0.000379682	2.85e-05	0.861667	7897.33	0.0155667	166.667		2.00027	0.574961
E64	E64_P8B7		pGS030 [1.67 ng]	pGS029 [1.67 ng]	pLN095 & pLN100 [each 1.5 ng]	pLN007 [7.5 ng]	pMZ219 [30 ng]	pKH026 [30 ng]		RA	6xfL	F.L.T.	SRE_	EF1a	1	7.5		0.0023821	0.000434874	0.86	11691.7	0.0758	312		0.000462689	6.51e-05	0.875	8631	0.0216333	161		5.14839	1.18663
E64	E64_P8B8		pGS030 [1.67 ng]	pGS029 [1.67 ng]	pLN105 & pLN110 [each 13.3 ng]	pLN007 [7.5 ng]	pMZ219 [30 ng]	pKH026 [30 ng]		K55	6xfL	F.L.T.	SRE_	EF1a	9	7.5		0.00140277	0.000341364	0.835333	7108	0.0432667	189.333		0.000529883	3.76e-05	0.821667	6146.67	0.0136	196.333		2.64731	0.67103
E64	E64_P8B9		pGS030 [1.67 ng]	pGS029 [1.67 ng]	pLN105 & pLN110 [each 4.43 ng]	pLN007 [7.5 ng]	pMZ219 [30 ng]	pKH026 [30 ng]		K55	6xfL	F.L.T.	SRE_	EF1a	3	7.5		0.00344524	0.000369174	0.844667	9371.33	0.0951	285.667		0.000622056	7.88e-05	0.874	7532.67	0.0171	238		5.53847	0.919242
E64	E64_P8E10		pGS030 [1.67 ng]	pGS029 [1.67 ng]	pLN105 & pLN110 [each 1.5 ng]	pLN007 [2.5 ng]	pMZ219 [30 ng]	pKH026 [30 ng]		K55	6xfL	F.L.T.	SRE_	EF1a	1	2.5		0.0017027	1.89e-05	0.866	13202.7	0.0631	309.333		0.000127013	2.05e-05	0.850667	9469.67	0.0057	184		13.4057	2.16468
E64	E64_P8E2		pGS030 [1.67 ng]	pGS029 [1.67 ng]	pLN085 & pLN090 [each 13.3 ng]	pLN007 [2.5 ng]	pMZ219 [30 ng]	pKH026 [30 ng]		RBDCRD	6xfL	F.L.T.	SRE_	EF1a	9	2.5		0.00143592	0.000187027	0.842333	6871.33	0.0256	334.333		0.000481766	0.000141318	0.821667	7444.33	0.00993333	296		2.98053	0.956599
E64	E64_P8E3		pGS030 [1.67 ng]	pGS029 [1.67 ng]	pLN085 & pLN090 [each 4.43 ng]	pLN007 [2.5 ng]	pMZ219 [30 ng]	pKH026 [30 ng]		RBDCRD	6xfL	F.L.T.	SRE_	EF1a	3	2.5		0.00270742	0.000600534	0.859	8784	0.0450333	461.667		0.000473854	5.62e-05	0.885	9075.67	0.0122667	313.667		5.71362	1.43709
E64	E64_P8E4		pGS030 [1.67 ng]	pGS029 [1.67 ng]	pLN085 & pLN090 [each 1.5 ng]	pLN007 [2.5 ng]	pMZ219 [30 ng]	pKH026 [30 ng]		RBDCRD	6xfL	F.L.T.	SRE_	EF1a	1	2.5		0.00649387	0.000671653	0.903333	10618.7	0.0811	772		0.000340916	7.99e-05	0.886	9247.67	0.0105667	263.667		19.0483	4.87862
E64	E64_P8E5		pGS030 [1.67 ng]	pGS029 [1.67 ng]	pLN095 & pLN100 [each 13.3 ng]	pLN007 [2.5 ng]	pMZ219 [30 ng]	pKH026 [30 ng]		RA	6xfL	F.L.T.	SRE_	EF1a	9	2.5		0.000135258	3.78e-05	0.861667	8755.33	0.0102667	99.1333		8.42e-05	3.18e-05	0.880333	7196.33	0.00416667	125		1.60679	0.754561
E64	E64_P8E6		pGS030 [1.67 ng]	pGS029 [1.67 ng]	pLN095 & pLN100 [each 4.43 ng]	pLN007 [2.5 ng]	pMZ219 [30 ng]	pKH026 [30 ng]		RA	6xfL	F.L.T.	SRE_	EF1a	3	2.5		0.000224601	4.75e-05	0.893	11319	0.0251333	90.8333		8.06e-05	7.74e-06	0.892333	8308.67	0.0051	127.067		2.78739	0.647046
E64	E64_P8E7		pGS030 [1.67 ng]	pGS029 [1.67 ng]	pLN095 & pLN100 [each 1.5 ng]	pLN007 [2.5 ng]	pMZ219 [30 ng]	pKH026 [30 ng]		RA	6xfL	F.L.T.	SRE_	EF1a	1	2.5		0.000540746	9e-05	0.902667	12334.3	0.0444667	136.667		8.74e-05	3.18e-05	0.878333	8118.33	0.00526667	114.333		6.19055	2.47641
E64	E64_P8E8		pGS030 [1.67 ng]	pGS029 [1.67 ng]	pLN105 & pLN110 [each 13.3 ng]	pLN007 [2.5 ng]	pMZ219 [30 ng]	pKH026 [30 ng]		K55	6xfL	F.L.T.	SRE_	EF1a	9	2.5		0.000272462	7.19e-05	0.870667	8811.67	0.0163	128		0.000151054	0.000105426	0.873667	7145.67	0.00503333	167.967		1.80374	1.34592
E64	E64_P8E9		pGS030 [1.67 ng]	pGS029 [1.67 ng]	pLN105 & pLN110 [each 4.43 ng]	pLN007 [2.5 ng]	pMZ219 [30 ng]	pKH026 [30 ng]		K55	6xfL	F.L.T.	SRE_	EF1a	3	2.5		0.000560183	3.86e-05	0.886333	10174.3	0.0338667	149.333		0.000111546	1.81e-05	0.873333	8160.33	0.005	163		5.022	0.88355
