# Supplementary material for: Synthetic gene circuits that selectively target RAS-driven cancers
Source: eLife. 2026 Feb 24;14:RP104320. doi: 10.7554/eLife.104320 (PMC12931925; doi:10.7554/eLife.104320)
Supplement: Supplementary file 8. [file elife-104320-supp8.xlsx]

## Sheet: Table S12
	Supplementary File 12: Statistical tests
	Experiment	Test	Comparison	Adjusted	F-value	t-value	Degrees of freedom
				P Value
	Fig.1c	unpaired two-tailed Student’s t-test		<0.0001		17.85	4
	Fig.1 Suppl.2b	one-way ANOVA with Tukey`s multiple comparisons	KRAS-G12D vs. no RAS	0.0002	20.69		22
			KRAS-G12D vs. KRAS-G12C	>0.9999
			KRAS-G12D vs. KRAS-G12V	0.0528
			KRAS-G12D vs. KRAS-G13D	0.0971
			KRAS-G12D vs. KRAS-Q61H	0.116
			KRAS-G12D vs. KRAS-WT	0.0005
	Fig.1 Suppl.2d	one-way ANOVA with Tukey`s multiple comparisons	KRAS-G12D vs. no RAS	0.094	14.51		8
			KRAS-G12D vs. HRAS-G12D	0.0121
			KRAS-G12D vs. NRAS-G12D	0.2221
	Fig.1 Suppl.2e	one-way ANOVA with Tukey`s multiple comparisons	KRAS-G12D vs. no RAS	0.0007	40.42		8
			KRAS-G12D vs. HRAS-G12D	0.144
			KRAS-G12D vs. NRAS-G12D	0.0083
	Fig.1 Suppl.2f	one-way ANOVA with Tukey`s multiple comparisons	KRAS-G12D vs. no RAS	0.3937	18.68		8
			KRAS-G12D vs. HRAS-G12D	0.0445
			KRAS-G12D vs. NRAS-G12D	0.0017
	Fig.2a	one-way ANOVA with Dunnett`s multiple comparisons	Junk vs. KRASG12D:	<0.0001	16.98		40
			Junk vs. KRASWT:	0.6286
			Junk vs. NF1:	0.9151
			Junk vs. Sos-1:	0.0297
	Fig.2b	one-way ANOVA with Dunnett`s multiple comparisons	Junk vs. KRASG12D:	0.001	48.42		2779
			Junk vs. KRASWT:	0.2345
			Junk vs. NF1:	<0.0001
			Junk vs. Sos-1:	<0.0001
	Fig.2c	one-way ANOVA with Dunnett`s multiple comparisons	Junk vs. KRASG12D:	0.0002	26.64		10
			Junk vs. KRASWT:	0.453
			Junk vs. NF1:	0.0461
			Junk vs. Sos-1:	0.8267
	Fig.2d	one-way ANOVA with Dunnett`s multiple comparisons	Junk vs. KRASG12D:	0.4045	135.2		10
			Junk vs. KRASWT:	<0.0001
			Junk vs. NF1:	0.9996
			Junk vs. Sos-1:	0.0038
	Fig.5c	Wald test	3x rigid Linker	ON-Model: 0.088509, OFF-Model: 0.00356,		ON-Model: 1.711 OFF-Model: 2.948	208
			pFos_NarL-F.L.T.	ON-Model: 3.09e-06, OFF-Model: 0.16454,		ON-Model: 4.795 OFF-Model: 1.395
			PY2_NarL-F.L.T.	ON-Model: 4.43e-08, OFF-Model: 0.28729,		ON-Model: 5.683 OFF-Model: -1.067
			SRE_NarL-F.L.T.	ON-Model: 2.97e-07, OFF-Model: 5.34e-06,		ON-Model: 5.298 OFF-Model: 4.673
			pFos_NarL-VP48	ON-Model: 0.001663, OFF-Model: 0.13497,		ON-Model: -3.186 OFF-Model: -1.501
			PY2_NarL-VP48	ON-Model: 0.217294, OFF-Model: 1.49e-06,		ON-Model: -1.238 OFF-Model: -4.956
			SRE_NarL-VP48	ON-Model: 0.351598, OFF-Model: 0.15041,		ON-Model: -0.934 OFF-Model: -1.443
			EF1a_NarL-F.L.T.	ON-Model: < 2e-16, OFF-Model: 0.01544,		ON-Model: -10.418 OFF-Model: -2.442
			pFos_NarX	ON-Model: 0.000349, OFF-Model: 0.00024,		ON-Model: 3.636 OFF-Model: 3.738
			PY2_NarX	ON-Model: 4.38e-09, OFF-Model: 7.64e-06,		ON-Model: 6.129 OFF-Model: 4.591
			SRE_NarX	ON-Model: 1.26e-06, OFF-Model: 1.93e-12,		ON-Model: 4.993 OFF-Model: 7.49
			K55	ON-Model: 1.96e-07, OFF-Model: 9.20e-11,		ON-Model: -5.384 OFF-Model: -6.83
			RA(Rassf5)	ON-Model: < 2e-16, OFF-Model: < 2e-16,		ON-Model: -11.783 OFF-Model: -9.922
	Fig.5 – Suppl. 1a	one-way ANOVA with Tukey`s multiple comparisons	RBDCRD vs. K55	0.0003	14.6		51
			RBDCRD vs. RA(Rassf5)	<0.0001
			K55 vs. RA(Rassf5)	0.6977
	Fig.5 – Suppl. 1b	one-way ANOVA with Tukey`s multiple comparisons	RBDCRD vs. K55	0.5681	18.5		100
			RBDCRD vs. RA(Rassf5)	<0.0001
			K55 vs. RA(Rassf5)	<0.0001
	Fig.5 – Suppl. 2a	one-way ANOVA with Dunnett`s multiple comparisons	EF1a vs. pFos	0.0517	2.771		48
			EF1a vs. PY2	0.0129
			EF1a vs. SRE	0.0593
	Fig.5 – Suppl. 2b	one-way ANOVA with Dunnett`s multiple comparisons	EF1a vs. pFos	0.9644	2.41		48
			EF1a vs. PY2	0.67
			EF1a vs. SRE	0.6076
	Fig.5 – Suppl. 2c	one-way ANOVA with Dunnett`s multiple comparisons	EF1a vs. pFos	0.352	8.616		48
			EF1a vs. PY2	0.0034
			EF1a vs. SRE	0.8864
	Fig.5 – Suppl. 2d	one-way ANOVA with Dunnett`s multiple comparisons	EF1a vs. pFos	0.0654	2.24		17
			EF1a vs. PY2	0.597
			EF1a vs. SRE	0.3814
	Fig.5 – Suppl. 2e	one-way ANOVA with Dunnett`s multiple comparisons	EF1a vs. pFos	0.3788	1.983		17
			EF1a vs. PY2	0.1668
			EF1a vs. SRE	0.2135
	Fig.5 – Suppl. 2f	one-way ANOVA with Dunnett`s multiple comparisons	EF1a vs. pFos	0.9967	8.665		17
			EF1a vs. PY2	0.0005
			EF1a vs. SRE	0.2504
	Fig.5 – Suppl. 2g	one-way ANOVA with Dunnett`s multiple comparisons	EF1a vs. pFos	0.4667	3.631		161
			EF1a vs. PY2	0.0094
			EF1a vs. SRE	0.0654
	Fig.5 – Suppl. 2h	one-way ANOVA with Dunnett`s multiple comparisons	EF1a vs. pFos	0.6679	5.508		161
			EF1a vs. PY2	0.8612
			EF1a vs. SRE	0.0989
	Fig.5 – Suppl. 2i	one-way ANOVA with Dunnett`s multiple comparisons	EF1a vs. pFos	0.1278	6.076		161
			EF1a vs. PY2	0.0025
			EF1a vs. SRE	0.9038
	Fig.5 – Suppl. 3a	one-way ANOVA with Dunnett`s multiple comparisons	RBDCRD vs. K55	0.004	24.21		154
			RBDCRD vs. RA(Rassf5)	<0.0001
			K55 vs. RA(Rassf5)	0.0009
	Fig.5 – Suppl. 3b	one-way ANOVA with Dunnett`s multiple comparisons	RBDCRD vs. K55	<0.0001	23.48		154
			RBDCRD vs. RA(Rassf5)	<0.0001
			K55 vs. RA(Rassf5)	0.5484
	Fig.5 – Suppl. 3c	one-way ANOVA with Dunnett`s multiple comparisons	RBDCRD vs. K55	0.9262	1.511		154
			RBDCRD vs. RA(Rassf5)	0.4029
			K55 vs. RA(Rassf5)	0.2258
	Fig.5 – Suppl. 3d	unpaired t-test		<0.0001		4.441	115
	Fig.5 – Suppl. 3e	unpaired t-test		0.0258		2.258	115
	Fig.5 – Suppl. 3f	unpaired t-test		<0.0001		4.075	115
	Fig.5 – Suppl. 3g	unpaired t-test		0.5619		0.5846	43
	Fig.5 – Suppl. 3h	unpaired t-test		0.256		1.151	43
	Fig.5 – Suppl. 3i	unpaired t-test		0.487		0.7011	43
	Fig.7a	multiple unpaired t-tests	RAS Sensor_F.L.T.	0.001264		3.516	34
			pFos_NarL-F.L.T.	0.003105		3.184
			SRE_NarL-F.L.T.	0.000561		3.807
			PY2_NarL-F.L.T.	0.001741		3.399
			PY2_all_F.L.T.	0.000343		3.98
			RBDr89lCRDc168S_Sensor	0.469809		0.731
	Fig.8a	one-way ANOVA with Tukey`s multiple comparisons	GFP-Circuit vs. RAS_Sensor_F.L.T.	<0.0001	27.07		8
			GFP-Circuit vs. PY2_NarL-F.L.T.	0.0011
			GFP-Circuit vs. EF1a_HSV-TK	0.0013
	Fig.8b	one-way ANOVA with Tukey`s multiple comparisons	GFP-Circuit vs. RAS_Sensor_F.L.T.	<0.0001	50.98		8
			GFP-Circuit vs. PY2_NarL-F.L.T.	0.0001
			GFP-Circuit vs. EF1a_HSV-TK	0.003
	Fig.8d	one-way ANOVA with Tukey`s multiple comparisons	GFP-Circuit vs. RAS_Sensor_F.L.T.	0.078	2.246		8
			GFP-Circuit vs. PY2_NarL-F.L.T.	0.5823
			GFP-Circuit vs. EF1a_HSV-TK	0.5918
	Fig.8e	one-way ANOVA with Tukey`s multiple comparisons	GFP-Circuit vs. RAS_Sensor_F.L.T.	0.0135	5.965		8
			GFP-Circuit vs. PY2_NarL-F.L.T.	0.8721
			GFP-Circuit vs. EF1a_HSV-TK	0.9191
	Fig.8g	one-way ANOVA with Tukey`s multiple comparisons	GFP-Circuit vs. RAS_Sensor_F.L.T.	0.2034	15.23		8
			GFP-Circuit vs. PY2_NarL-F.L.T.	0.0099
			GFP-Circuit vs. EF1a_HSV-TK	0.034
	Fig.8h	one-way ANOVA with Tukey`s multiple comparisons	GFP-Circuit vs. RAS_Sensor_F.L.T.	<0.0001	31.02		8
			GFP-Circuit vs. PY2_NarL-F.L.T.	0.0002
			GFP-Circuit vs. EF1a_HSV-TK	0.0006
	Fig.8j	one-way ANOVA with Tukey`s multiple comparisons	GFP-Circuit vs. RAS_Sensor_F.L.T.	0.57	1.361		8
			GFP-Circuit vs. PY2_NarL-F.L.T.	0.1801
			GFP-Circuit vs. EF1a_HSV-TK	0.5393
	Fig.8k	one-way ANOVA with Tukey`s multiple comparisons	GFP-Circuit vs. RAS_Sensor_F.L.T.	<0.0001	50.98		8
			GFP-Circuit vs. PY2_NarL-F.L.T.	0.0001
			GFP-Circuit vs. EF1a_HSV-TK	0.003
	Suppl. File 10a	unpaired t-test		0.2615		1.126	214
